# Supplementary material for: A Risk Signature with Autophagy-Related Long Noncoding RNAs for Predicting the Prognosis of Clear Cell Renal Cell Carcinoma: Based on the TCGA Database and Bioinformatics
Source: Dis Markers. 2021 May 7;2021:8849977. doi: 10.1155/2021/8849977 (PMC8121606; doi:10.1155/2021/8849977)
Supplement: Supplementary Materials — Table S1: 232 autophagy genes obtained from the Human Autophagy Database. Table S2: 210 autophagy genes expression matrix. Table S3: 813 autophagy-related lncRNAs. Table S4: 17 autophagy genes and 19 lncRNAs used to enrichment analyses. Table S5: results of enrichment via DAVID web serve. [file 8849977.f1.zip]

Archive with 5 entries (5 files):
- 8849977.f1.xls
- 8849977.f2.xls
- 8849977.f3.xls
- 8849977.f4.xlsx
- 8849977.f5.xlsx
