# Supplementary material for: A Risk Signature with Autophagy-Related Long Noncoding RNAs for Predicting the Prognosis of Clear Cell Renal Cell Carcinoma: Based on the TCGA Database and Bioinformatics
Source: Dis Markers. 2021 May 7;2021:8849977. doi: 10.1155/2021/8849977 (PMC8121606; doi:10.1155/2021/8849977)
Supplement: Supplementary Materials — Table S1: 232 autophagy genes obtained from the Human Autophagy Database. Table S2: 210 autophagy genes expression matrix. Table S3: 813 autophagy-related lncRNAs. Table S4: 17 autophagy genes and 19 lncRNAs used to enrichment analyses. Table S5: results of enrichment via DAVID web serve. [file 8849977.f1.zip › 8849977.f2.xls]

## Sheet: ARGexp
ID	TCGA-A3-3358-11A-01R-1541-07	TCGA-CZ-4865-11A-01R-1503-07	TCGA-CW-5591-11A-01R-1541-07	TCGA-CW-6090-11A-01R-1672-07	TCGA-B0-5402-11A-01R-1503-07	TCGA-B0-5699-11A-01R-1541-07	TCGA-CJ-5679-11A-01R-1541-07	TCGA-CW-5589-11A-01R-1541-07	TCGA-CZ-5986-11A-01R-1672-07	TCGA-CZ-5462-11A-01R-1503-07	TCGA-CZ-5982-11A-01R-1672-07	TCGA-CJ-5689-11A-01R-1541-07	TCGA-CZ-5458-11A-01R-1503-07	TCGA-B8-4622-11A-01R-1758-07	TCGA-B0-5694-11A-01R-1541-07	TCGA-CZ-5987-11A-01R-1672-07	TCGA-B0-5696-11A-01R-1541-07	TCGA-CJ-5677-11A-01R-1541-07	TCGA-CZ-5470-11A-01R-1503-07	TCGA-B0-5709-11A-01R-1541-07	TCGA-B8-4619-11A-01R-1758-07	TCGA-B8-4620-11A-01R-1758-07	TCGA-CZ-5984-11A-01R-1672-07	TCGA-CW-5584-11A-01R-1541-07	TCGA-B0-5703-11A-01R-1541-07	TCGA-CJ-5678-11A-01R-1541-07	TCGA-CJ-6030-11A-01R-1672-07	TCGA-CZ-5466-11A-01R-1503-07	TCGA-B0-4712-11A-02R-1503-07	TCGA-CJ-5676-11A-01R-1541-07	TCGA-CW-5587-11A-01R-1541-07	TCGA-B0-5701-11A-01R-1541-07	TCGA-CJ-5680-11A-01R-1541-07	TCGA-CZ-5468-11A-01R-1503-07	TCGA-CJ-5681-11A-01R-1541-07	TCGA-CZ-5469-11A-01R-1503-07	TCGA-B0-5697-11A-01R-1541-07	TCGA-CZ-5461-11A-01R-1503-07	TCGA-B0-5712-11A-01R-1672-07	TCGA-B0-5691-11A-01R-1541-07	TCGA-B8-5549-11A-01R-1541-07	TCGA-CZ-4864-11A-01R-1503-07	TCGA-CZ-5454-11A-01R-1503-07	TCGA-CW-5585-11A-01R-1541-07	TCGA-CW-5580-11A-02R-1672-07	TCGA-CZ-5465-11A-01R-1503-07	TCGA-B0-5705-11A-01R-1541-07	TCGA-CZ-5985-11A-01R-1672-07	TCGA-CW-5581-11A-01R-1541-07
AMBRA1	4.10913	5.87324	4.327	5.84321	5.20179	5.47452	5.48353	6.16829	5.33052	5.85001	5.00021	6.40531	5.44062	3.99303	5.92741	6.12223	5.7747	5.57658	5.85183	5.13811	3.66659	5.3033	5.12622	7.13524	4.77036	4.76911	5.35521	4.8718	7.45855	5.02255	5.94827	6.25131	6.76081	5.95979	5.22905	6.35418	5.62598	6.32437	6.21151	5.79687	7.24393	4.6723	6.30694	5.53033	6.18968	5.9732	5.27481	5.22596	6.32813
APOL1	10.3813	21.246	313.021	13.2985	46.0182	19.3154	34.8779	14.8244	20.1362	21.4489	10.3711	36.5881	14.5931	9.95546	39.3865	37.0101	17.5426	22.1372	15.8027	20.3414	13.9854	34.0921	23.4692	32.3992	26.0124	23.3344	17.5664	19.6526	29.0956	23.9668	22.6805	25.6887	29.9156	31.5986	18.5668	22.02	15.561	20.6352	39.9245	25.8615	23.291	14.1952	24.1267	17.395	22.2122	15.3604	16.8255	16.5289	13.5189
ARNT	8.14514	17.2305	7.97423	10.5698	10.7329	10.6162	12.211	10.3326	11.0426	11.1333	8.72503	11.0451	11.5194	8.94698	11.4634	13.7946	10.4518	10.8589	13.1606	10.8277	6.64373	11.0535	9.29585	10.7177	9.26487	9.63631	7.9909	9.78474	9.77927	10.5997	10.4543	12.6428	13.9774	9.75484	9.1019	11.0908	10.3525	9.21507	12.703	11.8209	12.09	8.17249	11.1527	9.20452	12.1617	14.3707	12.4912	8.73117	10.4436
ARSA	11.1342	7.89889	13.0691	10.3622	16.244	10.5646	10.9173	12.4588	7.07001	7.44519	8.87865	11.3767	6.82081	11.3377	8.52543	5.11965	10.5856	11.5158	6.70771	11.52	11.8434	8.33993	6.89496	14.4608	11.7589	8.34201	12.9078	9.2165	5.46956	13.9851	11.7661	12.2094	14.9328	10.3499	10.1	7.66985	8.04179	5.73668	9.63381	9.59941	7.52995	9.72981	6.75906	13.175	8.31864	5.97401	5.58633	5.05137	9.00881
ARSB	14.7098	4.80283	14.8681	20.1192	7.8831	4.40055	6.83198	10.1304	5.21839	5.31597	9.14762	6.322	3.38154	5.51057	6.24461	11.5713	6.65532	8.45183	4.54655	10.1785	9.19676	4.02085	6.58768	9.65637	5.00783	4.83524	7.31546	11.2977	5.37847	9.49996	11.1248	5.96144	8.59183	3.39429	5.39978	3.6521	4.32563	4.86332	5.414	9.2273	5.48125	14.7626	6.23576	9.61738	4.25925	4.94849	4.74258	8.35989	7.5967
ATF4	57.84	48.6422	42.498	42.8454	48.6877	47.1833	72.3017	51.3433	54.4336	30.9764	37.7367	69.2241	66.6013	31.0105	71.9157	68.0192	43.3219	59.4808	51.5844	73.0093	53.4344	84.1983	63.542	57.1092	87.2702	59.4301	76.224	47.7677	42.5431	96.6817	39.9854	50.9479	80.4961	41.6302	50.3336	51.3879	54.6867	55.1832	93.7462	54.8332	39.5682	40.8101	44.1701	44.0694	48.944	36.992	50.3153	41.1024	45.4253
ATF6	10.0231	18.5931	9.90023	14.2978	12.6809	12.1912	14.8667	13.5731	12.7491	17.9475	10.3322	15.9978	15.3991	11.8661	13.2195	18.9927	11.6734	13.4478	15.1315	11.777	7.9766	12.2819	11.7785	14.9996	14.2937	11.4507	12.3604	13.999	17.5763	15.0568	13.6859	14.9065	13.6889	16.9664	12.5014	17.2982	10.6328	14.7765	14.065	14.3122	20.3824	10.6175	15.5273	11.8255	12.9296	19.4418	13.0875	12.0912	11.7642
ATG10	1.41182	1.60122	1.25318	1.40439	1.08517	1.1975	2.01768	1.45047	1.56489	2.11299	1.03579	1.1473	1.56765	1.40665	1.2211	1.88189	1.60814	1.13577	3.08953	1.62851	1.14369	1.90856	1.72202	1.3279	2.01337	1.00618	1.22754	1.31943	1.48301	1.52442	1.34148	1.39932	1.66921	1.83822	1.32315	1.74684	1.04633	1.74877	1.24309	1.14982	1.99167	1.13968	2.50622	1.10422	2.05499	2.90415	1.34738	1.04678	1.24775
ATG12	3.01821	3.16802	6.0704	2.46316	2.37236	2.0102	2.94248	2.23265	2.24633	2.30183	2.09769	2.53363	2.13587	2.93397	2.81975	3.23967	1.99296	2.22644	2.88698	2.55304	2.76139	3.34825	2.44962	2.52188	3.23142	2.09947	2.38221	2.68139	1.87046	2.88759	1.96579	2.36848	3.44943	2.1767	2.4221	1.64837	2.09361	2.06794	3.53575	2.41238	2.18529	2.08157	1.84357	1.9969	2.30395	2.99844	1.78787	1.93904	1.75558
ATG16L1	3.41451	3.65902	18.8832	4.5362	4.21367	3.49417	4.34226	3.79625	3.83433	3.85508	3.16712	3.97797	2.79034	3.19297	4.06072	4.13585	3.74566	4.29333	3.55588	4.09724	3.72794	3.83651	3.30782	4.68737	4.16916	3.16423	3.84889	3.66309	4.80549	4.70362	3.07855	3.50204	4.85557	4.25462	3.38828	3.36977	3.67818	3.90125	4.28759	3.93079	3.85644	3.62652	4.08562	3.12137	3.80144	4.04791	3.31451	3.14556	3.53891
ATG16L2	0.989911	0.631118	0.960055	0.895134	0.745476	0.414683	0.775269	0.509562	0.814654	0.405325	0.248379	0.77822	0.642603	0.348066	0.92015	0.433274	0.442052	0.618207	0.30469	1.17691	0.699411	0.844819	0.771987	0.698703	1.1917	0.331884	0.57713	0.330235	0.432602	0.514223	0.498284	0.769928	1.6716	0.673546	1.06596	0.688005	0.591367	0.400097	0.878762	0.910992	0.623414	0.543516	0.711456	0.323622	1.22928	0.376745	0.508545	0.403413	0.39102
ATG2A	4.45198	4.89528	4.82107	5.93858	4.22461	5.75698	5.39575	6.65599	4.86915	4.55796	5.10671	6.09654	4.25606	3.67341	5.43421	4.57178	6.78917	5.40712	3.97861	5.26722	3.71167	3.58144	4.82342	7.29766	4.42414	4.36866	5.50868	3.53363	4.63014	4.74014	6.11087	6.52232	6.71023	6.38155	4.98946	4.46203	6.43252	2.90565	4.15705	5.15613	6.07818	5.12086	5.13587	6.02377	6.71017	5.38295	5.27422	3.25679	6.61824
ATG2B	3.09241	4.50316	3.26216	5.01154	3.56478	3.68877	4.23981	4.25461	4.30593	5.04772	3.92004	3.83808	4.16726	3.07394	3.70929	5.03378	3.84096	4.49957	4.15699	3.67906	2.33588	3.60707	3.82208	3.93422	2.43886	3.24067	3.14396	3.56745	3.90816	3.90436	4.18227	4.14793	4.63364	4.47642	3.01684	4.34961	3.59945	3.47878	3.53485	4.56053	5.60394	3.30842	5.38061	3.30091	4.86162	5.93383	5.21991	4.07343	3.84211
ATG3	7.23365	7.68497	6.25245	6.443	6.40824	6.2732	7.30183	6.85245	7.40253	9.80426	6.21342	7.91156	7.26213	8.28226	7.25522	7.61178	6.85662	6.74303	8.89507	7.55087	7.12181	8.08575	6.87593	6.93813	8.77941	6.17686	7.45644	8.11551	8.67515	6.97378	6.81955	5.96599	7.61455	8.01674	6.34232	7.45293	7.05375	8.75664	6.79634	6.97339	6.77336	6.47842	7.59907	6.8922	7.63699	8.12818	6.33624	6.06901	6.39326
ATG4A	8.04828	7.86608	6.2266	7.46914	6.28554	6.30312	6.77546	6.06371	6.89163	8.81421	6.65682	6.51842	7.51228	7.98408	6.16064	6.50004	6.15095	6.77141	8.69589	7.35784	8.15732	5.94905	6.66174	5.4212	6.98241	6.27799	6.22279	7.17	7.45336	7.03226	6.62911	5.25303	5.71868	6.87085	5.81708	8.07164	6.41446	7.95161	4.90122	6.54658	6.7949	7.88997	6.79148	6.32653	6.09463	9.04169	5.86093	6.31454	5.87909
ATG4B	5.31728	7.66953	8.19659	4.73052	5.32047	5.16956	5.92333	5.74674	5.29697	6.43788	3.73779	6.12657	8.72486	4.1983	5.6793	4.02958	5.04363	5.9032	6.26068	6.05807	5.11144	6.36319	5.38996	5.07597	6.04896	4.69866	5.1226	4.11314	5.86073	4.76661	4.8636	5.71497	6.79641	7.50015	6.34812	8.19615	6.46858	5.20741	5.43302	4.83686	5.35617	4.40095	6.34528	5.72211	7.86637	6.17188	4.94144	3.356	5.13336
ATG4C	4.87678	5.59463	4.62356	5.83112	5.25022	4.50225	5.59172	4.85483	5.43054	6.72198	4.85814	4.88285	4.4496	6.56327	5.0622	5.06508	5.13542	5.03792	6.99213	5.76999	5.63224	5.59042	5.90671	4.6882	5.2108	4.7604	4.43744	5.90935	3.84124	5.64247	5.31704	4.11994	5.38217	4.7709	5.18009	4.23528	4.78126	4.75411	4.89927	5.36572	4.48304	4.3015	4.45334	5.54789	4.70965	7.02126	4.84157	4.91181	5.00434
ATG4D	10.5862	5.41426	4.90646	8.5953	7.20317	9.57372	9.10689	9.08979	8.41094	7.02877	9.54857	8.23307	8.8055	4.97393	8.36793	4.92807	10.2804	9.3471	6.12026	9.03363	8.68003	5.40811	9.38348	7.06919	10.5037	6.98457	10.9265	6.65757	7.36932	8.69073	7.21334	7.76413	8.79018	8.42426	9.45024	6.83092	9.84631	5.84042	5.71097	7.98897	8.3559	9.39381	8.47155	10.125	8.70674	5.94972	7.89022	5.56664	9.23565
ATG5	10.9356	11.5417	7.17187	9.51004	8.49574	8.29278	10.5226	8.7459	9.17688	14.6685	7.74049	10.0909	9.73686	12.2504	9.04058	9.66473	8.37868	8.3948	12.887	10.0054	10.9643	11.1035	9.0973	9.33572	12.6691	8.79346	9.91041	11.3243	12.0978	10.0439	9.18564	7.81501	11.0409	11.8485	8.14052	10.7925	8.24178	12.6105	9.49242	8.77284	10.1372	7.80915	10.1554	8.93457	9.43905	13.471	8.35598	7.84015	7.96053
ATG7	2.28339	2.56823	2.43297	2.35793	2.48907	2.32172	2.8845	2.67039	2.72313	3.6001	2.03537	2.95104	2.80564	2.69285	2.86692	3.30616	2.52944	2.33254	2.87055	2.77623	2.17758	3.15777	2.33878	3.25205	2.9836	2.28248	2.7053	2.77375	3.1326	2.57421	2.54655	3.0489	3.65297	3.37369	2.30114	2.46577	2.44239	2.46729	2.67615	2.68684	2.61724	2.29081	3.06331	2.60032	2.56746	2.96122	2.43988	2.08414	2.44315
ATG9A	6.74134	7.62134	15.9526	8.87469	8.07883	7.99868	8.95665	10.4055	7.79833	7.36653	6.2843	9.15159	9.46284	6.22853	8.92165	7.87655	9.23985	8.8315	6.75435	8.29778	5.84412	7.08601	7.68682	12.0051	8.04131	6.82813	8.47804	7.50789	8.4809	8.53244	9.51214	9.26556	10.6672	10.037	9.0594	8.30292	7.70332	7.30102	8.39719	8.25516	9.10066	8.00024	9.64802	10.1982	8.34959	8.41882	7.50522	6.97461	9.5991
ATG9B	0.0498953	0.0980831	0.338963	0.0404684	0.0967277	0.0759671	0.157029	0.0916059	0.0839952	0.0778446	0.0322487	0.192931	0.149383	0.0488852	0.107437	0.176056	0.0614729	0.120126	0.0741747	0.0418746	0.0441412	0.116828	0.0835562	0.124852	0.103562	0.0988906	0.0817054	0.0607169	0.0724205	0.1569	0.053468	0.159896	0.0892869	0.151357	0.242196	0.213614	0.0686236	0.171563	0.233122	0.0705696	0.165195	0.0506094	0.189621	0.0687827	0.163126	0.0985029	0.085428	0.0497957	0.0439344
ATIC	14.2372	12.8919	18.2916	19.4394	14.195	16.7109	16.7214	19.0857	15.8477	22.4569	13.8359	16.8078	16.6017	14.969	15.262	16.6336	14.0983	15.7876	13.6188	14.3578	12.1962	12.593	12.3442	20.4015	14.2254	15.2813	17.9371	20.5343	22.3241	16.6658	19.169	12.3114	16.0769	17.2901	17.6965	18.8582	14.4352	17.347	14.9412	15.0289	13.6524	13.2309	18.5579	15.9125	13.0216	15.7691	12.9777	15.6991	15.2361
BAG1	16.6785	35.2372	4.04039	11.8886	11.6262	14.5256	14.5215	16.8606	13.6018	34.2351	12.3844	20.9992	44.9474	12.6318	14.2973	11.2683	17.5427	13.2153	22.5015	14.8856	13.0286	12.3091	13.178	14.6149	27.6502	13.7558	16.5316	13.9444	30.3633	13.9394	15.3607	15.5291	10.5478	26.3808	15.033	35.8228	17.9089	22.9047	11.6245	12.8101	25.4572	13.158	24.567	14.3477	20.1227	25.4254	18.9427	12.4709	14.0872
BAG3	25.7342	22.5357	19.9438	27.9463	28.7905	28.5613	32.2748	38.2951	23.8636	25.8098	46.0036	30.3257	57.9267	22.4813	27.7035	30.2638	26.2471	32.7047	24.0935	27.9552	28.4095	28.5395	26.4657	31.5492	29.0734	22.4321	26.6444	19.3448	29.481	34.8114	27.0154	28.2151	38.7447	22.3153	31.1099	40.6328	31.8018	35.2938	25.7988	28.6211	41.44	35.8839	36.898	33.7154	42.8809	20.8051	31.136	31.574	32.592
BAK1	7.15392	26.0715	8.46636	5.179	7.61251	5.76813	7.4284	8.43466	6.35641	15.2527	4.98841	12.7132	20.031	8.41797	7.40552	9.68779	7.06579	6.90607	10.1934	6.98533	8.82308	9.62	6.90444	10.002	10.7445	5.57152	6.7841	6.92931	24.1192	7.16738	6.0248	9.40304	7.54371	16.794	8.1025	23.4072	7.90248	18.55	7.79785	5.7145	12.6411	7.11227	13.5215	6.96176	10.3397	15.5971	9.02849	5.46713	5.89351
BAX	7.49592	10.1049	12.3302	5.44566	9.52199	6.64357	12.0142	9.55249	4.63692	7.82975	4.88427	11.1714	7.01566	8.6711	10.882	10.3395	8.7355	8.48502	7.32973	8.32485	7.7523	13.1423	8.78758	18.359	12.1021	7.15806	9.87129	7.49984	10.3332	11.7959	8.09188	8.65381	16.0085	14.8059	8.90405	6.46455	7.57233	5.95554	10.3367	8.01009	5.72543	7.96671	7.20381	8.46428	6.95533	7.55799	5.84258	5.6777	7.44253
BCL2	5.41089	9.1506	9.91641	7.94529	7.06569	7.81117	9.54611	10.3937	9.11524	9.71471	7.55364	7.57191	8.07243	6.633	8.79802	8.43061	9.45775	7.20949	11.5081	6.93514	5.52068	9.25046	6.76778	12.2034	6.91836	6.88697	5.92526	8.00158	6.82823	7.82985	8.41807	8.27404	12.8048	9.66449	5.89613	7.79228	7.09499	7.263	10.3179	8.95326	9.68824	5.75406	10.1173	7.01108	10.2413	11.8961	8.73305	7.27863	7.261
BCL2L1	45.429	55.2477	38.8563	41.5463	46.5939	45.2983	52.3757	52.6123	47.3428	39.7119	46.9878	46.123	35.8649	40.3054	43.8553	42.3166	50.3372	51.3486	41.3069	51.0156	37.2464	38.9449	43.1202	59.8817	46.5704	39.6294	40.9151	40.6666	39.6564	46.6013	46.9475	38.6396	61.2208	44.9793	50.2839	41.3439	48.9971	36.8753	48.9107	39.1799	35.9475	40.4179	36.1348	50.2937	44.2712	41.5866	36.2009	38.8036	50.4185
BECN1	7.02555	10.061	6.95319	8.66003	8.64285	8.37789	10.1306	8.87552	9.81151	13.6214	7.27196	9.95935	9.40247	8.03713	8.05946	9.16193	9.23048	7.89259	12.4925	8.67209	6.09364	8.75562	7.5597	10.1022	9.284	7.49613	8.51922	7.90354	13.3634	8.49926	8.31805	9.35838	9.82409	12.0335	7.55418	9.68262	9.27004	10.5565	9.00647	8.75536	10.3191	8.04224	10.171	7.26697	9.76249	12.2803	8.72049	7.24792	7.26696
BID	2.80617	3.52479	6.32718	2.73752	2.7325	2.20585	3.33197	2.83807	2.22442	2.34075	2.35706	2.78306	2.40276	3.19968	3.15126	4.04345	2.58949	2.79105	2.36213	2.72138	3.63406	3.59265	2.50858	3.9402	2.66607	3.08826	4.39875	3.1978	1.76974	3.71835	3.16123	2.06508	5.14168	2.88458	3.02798	2.61573	2.55066	2.20176	3.03323	2.961	1.85431	2.42693	1.68584	2.78081	1.90486	2.40434	1.57701	1.99873	2.39987
BIRC5	0.313448	0.164312	0.999893	0.0957091	0.331127	0.0865384	0.341585	0.23423	0.124475	0.311381	0.0498683	0.198459	0.0816609	0.469525	0.329966	0.462509	0.107459	0.123208	0.159307	0.258446	0.24873	0.726936	0.203965	1.32148	0.368008	0.269205	0.263974	0.322097	0.190179	0.309018	0.210297	0.721169	2.86008	0.490758	5.16776	0.0994035	0.0383201	0.174815	0.350272	0.226855	0.0691848	0.172956	0.296303	0.374487	0.0843436	0.055005	0.158176	0.0513349	0.0683431
BIRC6	3.89425	5.77093	8.70147	8.98163	5.21994	6.96687	7.01986	7.32562	8.07204	5.84739	6.27074	7.05728	6.2147	4.24958	6.98099	9.82309	6.52975	6.85135	5.75899	5.37646	3.04748	4.75302	7.07557	6.6776	3.87255	5.09053	6.05402	5.52479	5.11504	6.38653	6.94361	8.4369	7.79955	5.38143	5.4011	6.06899	5.56549	5.88689	5.80221	8.58896	10.5255	5.07423	6.92343	4.36307	6.65074	10.0941	8.11245	7.51828	6.80569
BNIP1	4.36174	3.40921	3.21035	3.09887	3.61857	3.15181	4.03934	2.81614	3.15623	3.54528	2.52104	4.3264	4.04042	3.32912	3.85257	2.8297	2.67423	2.97947	3.42735	3.85614	4.44602	3.38789	3.75807	3.93166	6.00049	3.41907	3.65342	3.37504	5.33178	3.39321	3.82997	2.71904	3.80564	4.32252	3.50575	4.54862	3.8602	4.906	3.6007	2.79259	3.12427	3.52077	3.84395	3.80025	3.29683	3.9156	3.15617	2.98981	2.94265
BNIP3	22.3972	14.3798	71.8599	22.3012	15.3076	21.1832	17.0059	21.3888	17.3199	19.1815	23.5046	12.1527	14.5446	22.1734	13.731	10.156	23.3791	18.3671	17.0904	21.2195	27.8683	10.1889	19.7871	12.4103	16.5351	13.4988	21.1412	21.6868	16.481	18.0992	22.1891	11.547	21.8477	14.6782	21.4172	16.2581	21.3455	19.1723	8.5972	17.5687	13.3061	24.1112	12.8163	21.0238	14.4986	14.8013	12.1711	18.6671	17.6975
BNIP3L	35.7418	36.2478	215.393	38.0326	33.1556	33.2944	35.5392	32.8272	28.5228	36.9705	33.9239	27.0563	26.7514	50.5887	33.395	33.1243	33.9329	29.5933	37.5661	38.6716	44.9148	33.6621	30.8371	28.821	28.4804	28.8345	35.5405	44.0993	23.4267	34.5861	33.9779	32.7023	37.6471	26.8063	27.3227	20.9496	30.1847	25.8408	33.3261	35.3684	22.8833	38.1375	19.5423	37.9615	25.6431	32.5804	23.2578	30.1017	28.0794
CALCOCO2	12.2742	16.2608	15.4003	14.6204	15.2693	14.0367	15.9026	14.4989	15.498	15.1633	12.8574	15.4043	14.2127	12.2076	17.0114	16.0527	12.8157	14.9177	16.8214	15.4409	12.4245	14.7554	14.3419	14.2545	14.7685	13.8188	13.1475	15.6956	14.6663	16.2598	13.3862	15.6838	15.5654	14.1247	11.9517	17.4223	13.1577	15.1345	17.7005	16.5384	16.4631	12.3975	15.3239	15.0148	15.3715	16.5892	14.0607	13.6459	12.0991
CAMKK2	5.98966	5.73692	12.9642	10.9027	7.34085	7.20098	7.61361	8.6825	8.53749	6.07783	7.00402	7.2939	4.62967	6.96582	7.70359	8.0985	7.85436	7.75597	6.88692	7.42775	6.05722	7.47155	8.12068	7.75258	5.39102	6.64518	5.95183	7.84742	4.15288	6.6629	7.43607	7.96395	8.87423	5.96302	6.53816	3.82635	7.25577	5.04436	10.1275	7.78219	5.37167	7.63835	5.20281	7.8269	6.1838	5.6189	5.63429	6.70375	7.92867
CANX	116.122	133.277	305.642	160.563	144.075	136.767	159.423	150.81	130.145	138.897	123.175	166.433	112.012	179.515	138.634	216.573	145.747	146.16	136.011	144.512	132.052	202.571	129.762	178.782	141.042	144.232	155.298	172.286	130.354	172.659	147.287	126.604	150.943	133.106	152.899	109.303	117.398	149.356	149.034	145.611	114.222	153.83	140.034	169.277	113.249	133.724	119.921	147.012	143.043
CAPN1	14.6922	45.5701	23.0927	13.0142	19.709	17.0496	23.5161	21.5852	16.2401	42.6976	12.7621	33.3172	44.4254	19.4881	24.4911	22.9008	19.6302	17.2258	31.9642	17.7236	12.3392	25.6174	15.72	33.1553	26.8782	16.3525	17.4106	17.0839	42.7031	17.0365	18.3683	33.2809	33.0819	42.7056	17.9426	36.7693	19.0512	25.4629	23.1991	16.8761	31.9768	19.5206	34.6797	18.9844	26.8238	34.5194	26.4982	12.8997	18.2902
CAPN10	1.52262	1.4598	1.39672	1.12363	1.20471	1.4317	1.54917	1.58519	1.26797	1.83529	1.12424	1.95365	2.1312	0.858326	1.41741	1.0367	1.54725	1.54289	1.82636	1.52085	1.12206	1.67331	1.70048	1.79066	2.53053	0.845611	1.40397	0.985016	1.8511	1.40692	1.19867	1.64914	2.20487	2.35053	1.47968	2.09045	1.72407	1.48518	1.3769	1.308	1.81766	1.19442	2.10924	1.40791	2.10955	2.11235	1.57633	0.714037	1.35782
CAPN2	26.9641	39.5028	22.8594	36.6466	48.6088	47.6538	62.7445	50.6814	55.9001	47.9735	35.794	61.3456	54.2793	26.8788	49.2885	44.7133	45.1399	44.1596	52.1418	42.7701	25.4389	41.7581	48.8316	49.2908	50.9532	43.6196	42.8079	40.253	47.3974	39.3804	44.9668	30.9602	53.752	33.6742	47.3749	53.6286	34.7567	43.2581	48.1403	40.248	52.3257	29.5515	54.6566	45.9349	49.0327	47.2663	46.8337	37.9679	44.3551
CAPNS1	83.8461	112.066	126.955	74.4984	96.3439	85.7495	113.266	98.8321	87.3595	124.856	66.9577	127.621	119.664	90.4338	107.359	105.09	96.9733	85.9844	103.322	98.0746	83.4197	98.5905	79.0856	146.543	141.548	93.4386	107.588	86.6343	139.05	106.816	94.0468	104.558	128.516	142.015	83.2706	117.278	95.7994	100.547	112.905	77.6369	106.659	87.3059	117.719	99.3715	96.0909	100.571	85.611	73.1102	85.0624
CASP1	1.94019	3.53681	6.06182	1.20953	3.8812	1.10283	3.73049	1.85397	2.23886	3.07231	0.960327	3.59753	1.12779	4.42701	3.77541	5.32463	1.44116	1.8388	2.50466	2.6548	1.97651	8.30697	2.30222	3.80544	2.53824	2.19187	2.05085	3.76884	4.04907	3.45179	1.97666	2.31273	3.53974	3.7887	1.31629	1.29211	1.16903	2.02966	4.31548	3.50389	1.18396	1.7353	1.80653	1.83138	1.97692	1.79916	1.48028	1.38356	1.35045
CASP3	3.80864	9.56085	7.47261	4.10913	5.07607	3.1887	5.98837	5.10721	4.00969	5.61068	3.35236	6.58138	4.62439	8.03246	8.51534	8.78571	3.35854	5.20463	5.53878	5.36397	5.29022	9.26272	5.25771	8.3511	4.08877	4.85616	4.70895	7.63337	7.10679	7.96492	3.49007	4.23542	9.90154	5.74782	4.55951	5.58568	3.5804	7.37725	7.71955	5.31896	3.79177	4.3959	4.47537	3.70559	4.66174	6.8638	4.07884	3.73243	3.77738
CASP4	3.12575	5.56635	5.00619	2.49719	3.9209	1.65939	4.72729	2.59043	2.81701	3.89419	1.52728	4.09625	3.23121	3.99287	4.17495	5.26525	1.92331	2.94097	3.88308	3.63585	3.04317	5.57501	3.08049	6.28566	3.61823	2.59128	2.58732	3.80442	5.58051	4.68931	2.71507	3.05503	5.80527	5.09387	2.18937	3.85008	2.08672	3.56435	4.9724	3.43879	2.29593	2.68349	3.38382	2.12041	2.95696	3.87019	2.54443	1.80161	1.89339
CASP8	2.50949	2.97997	7.59213	2.97218	2.38793	2.23347	2.84353	2.82267	2.7736	3.87735	2.02689	3.68249	2.55852	3.32425	3.05614	3.7742	2.24042	2.70614	2.7237	3.06092	2.46794	3.3245	2.50673	4.02103	2.32049	2.33633	1.97744	3.33205	4.72008	3.47045	3.1425	2.66764	4.30686	2.77661	2.39013	2.9547	2.13083	4.14663	2.85435	3.24301	3.24322	2.72939	3.27038	2.73492	3.00314	3.16476	2.66405	2.78501	2.4589
CCL2	19.8799	39.2837	4.2367	7.88265	29.5032	14.8341	101.721	16.0893	21.3744	19.79	2.38688	50.1152	29.0506	15.1336	94.1222	84.2616	10.4931	25.6556	27.548	46.5254	8.41955	90.4172	27.7875	66.6674	22.9851	15.0763	20.1141	42.1496	16.2128	70.1276	7.39864	26.5983	104.787	49.2492	12.901	54.1086	21.2841	108.382	52.0881	34.7823	17.6288	35.8427	25.9568	17.0989	22.6763	21.4369	54.5768	24.2461	12.8355
CCR2	0.651344	0.766991	2.57356	0.444227	1.53001	0.228902	0.834601	0.883211	0.353975	2.13235	0.178373	1.20532	0.0484576	4.48035	2.13277	2.70586	0.709248	0.738696	1.68993	0.709358	1.39463	3.52165	0.465936	3.19653	0.424446	1.10047	0.839291	2.81528	0.231217	1.98196	0.74027	1.51614	1.13025	0.505717	0.540131	0.0541798	0.100702	0.375479	2.19306	2.78532	0.0998182	0.689692	0.182778	0.57775	0.396503	0.360426	0.561927	0.131156	0.440556
CD46	40.3751	61.7304	30.4963	45.8981	39.369	35.8431	45.7445	40.4841	47.7757	68.598	33.4393	46.6524	58.5051	40.1833	37.3995	37.5388	34.3512	36.8955	63.2673	39.2764	35.0793	39.166	40.1251	32.8645	57.4469	32.5785	42.8182	41.3135	51.2318	36.0863	44.4741	41.4088	32.0897	51.3443	40.2844	56.3567	34.6004	54.9428	32.3067	38.5015	59.636	38.0586	58.2618	40.7336	50.6837	60.3552	39.1612	33.8362	39.177
CDKN1A	10.0238	81.6598	22.816	8.05581	55.932	14.4028	78.5325	13.3457	11.0815	25.1532	19.5082	56.8602	142.397	26.6876	46.2255	67.9965	9.55441	30.1697	29.6904	23.4047	28.2191	97.1778	27.5833	36.6559	53.9354	16.1214	25.3752	27.6577	89.5943	39.4346	8.87044	51.1541	58.0044	87.3814	24.981	87.317	13.77	84.9781	58.004	16.0581	42.9125	29.2903	63.9606	20.0833	48.5041	28.5444	72.2951	40.1879	21.22
CDKN1B	17.9378	19.9554	20.2269	20.2525	21.265	24.1665	27.1066	18.8925	24.8186	20.281	23.1972	21.5935	15.0153	18.8944	25.0255	16.9571	20.5755	19.0846	25.2746	18.7954	19.734	21.6098	25.2444	19.4959	26.1854	22.0113	26.3695	23.6975	21.8855	20.1789	20.0051	19.7931	16.8121	25.3317	19.6784	20.9601	21.3377	20.9869	23.8672	21.1223	22.8111	14.475	20.353	20.4616	20.7554	23.5238	15.4257	15.3361	23.0456
CDKN2A	0.0368308	0.0391358	0.888424	0	0.102444	0.0179443	0.0311407	0.0249126	0.0190775	0.126651	0.0146491	0.0899459	0.0116073	0.144341	0.196376	0.0590715	0.0197291	0.0325736	0.0645803	0.0292833	0.0710909	0.307992	0.0140978	0.0502694	0.0324313	0.0364986	0.0258479	0.0149396	0.0433443	0.031302	0.024024	0.0254217	0.0199722	0.129746	0.658661	0.0175202	0.0144729	0.0574456	0.0496731	0.0309735	0	0.0717271	0.0423441	0.00951989	0.0445975	0.0228113	0.0199136	0	0.0185318
CFLAR	6.24291	7.52379	11.1388	8.63164	6.40357	7.39605	8.25959	7.94849	8.09316	6.1787	7.19406	6.30265	7.66397	3.57971	6.59114	8.44721	7.10053	7.8962	6.56935	6.92166	5.70089	5.06475	7.22268	6.59334	5.29699	5.00889	6.5445	5.27727	6.96002	6.14588	7.08268	8.28398	9.2358	5.82833	4.60148	7.27791	6.58543	7.13877	6.61181	8.74077	12.5577	5.85011	7.86077	5.60549	9.94121	8.05421	7.87162	7.83449	6.30641
CHMP2B	16.6576	21.5728	8.68793	16.4971	16.7748	13.8493	19.2177	16.0912	15.7476	21.8133	14.7259	18.9158	20.2641	18.7629	15.7114	18.9115	14.8542	13.6855	19.0506	14.8426	19.5277	19.8664	15.4489	15.7117	19.1008	12.7887	18.8734	19.6804	18.1032	18.4151	15.5316	14.9876	16.8632	17.2747	14.3931	16.1571	14.6447	18.9827	18.8459	15.2506	15.126	14.9538	15.9215	16.1697	15.8793	23.1456	14.821	12.516	12.6561
CHMP4B	55.1164	87.1488	102.38	50.7433	66.5492	62.8975	88.7346	72.4469	58.2397	89.3306	56.3557	95.8327	87.8696	59.9796	77.3118	79.3262	71.0343	71.2481	89.0663	68.9546	55.3899	77.8918	65.9515	107.376	97.8086	61.6747	69.793	67.8955	99.9897	80.6617	66.2975	66.3627	97.175	106.569	62.1148	95.313	73.0194	74.9507	92.5869	67.3161	74.8469	60.9789	87.6755	70.4887	74.066	78.8921	63.1443	48.2914	62.4345
CLN3	3.8929	6.81821	6.75411	3.21875	3.4651	2.92492	3.51891	4.2981	3.21528	6.70176	2.26435	4.98571	7.85185	3.34088	3.49516	3.21429	3.7469	3.1789	5.46508	3.38736	3.05242	3.4823	3.14651	5.05109	5.921	3.22332	4.13229	3.28524	5.83297	3.37937	3.53662	4.74618	4.35471	5.22728	3.48432	7.16266	2.88991	3.38735	3.87493	3.14567	6.42796	3.39635	5.7319	4.32439	5.22851	6.15952	4.27673	2.67405	3.93982
CTSB	213.242	64.1342	304.983	275.441	157.742	148.434	120.517	164.726	99.1808	79.3663	178.043	71.466	56.8609	208.654	153.139	151.074	188.567	155.578	61.8082	184.339	226.347	130.074	142.714	166.264	61.8245	148.677	182.591	236.682	65.567	185.621	232.842	111.257	185.751	72.6329	124.07	63.8967	106.098	88.7376	73.1587	175.661	56.3764	403.337	65.4718	230.168	57.6121	47.911	81.0452	158.167	192.026
CTSD	247.102	314.343	392.086	241.294	499.764	267.027	509.88	327.716	254.72	312.591	248.266	560.722	234.98	447	510.123	415.992	316.357	348.508	287.719	339.667	338.675	454.557	283.699	619.41	436.012	294.183	628.324	322.681	492.98	391.857	355.486	332.018	408.087	651.783	387.953	356.982	312.744	298.623	332.134	278.147	269.485	383.315	255.694	438.615	284.519	344.921	342.687	173.64	357.217
CX3CL1	13.2545	20.5069	28.0112	14.5246	25.649	19.5988	21.3802	23.8374	18.2276	12.1726	13.7685	22.4383	26.7238	12.7658	29.8412	32.2055	18.1835	17.9515	19.7717	25.063	16.6401	23.3901	20.5004	25.5092	29.798	25.2704	28.895	19.9202	12.758	23.0925	19.5057	23.9094	39.4306	18.0663	19.9242	23.8978	14.8073	23.3896	27.1123	16.6492	18.6061	13.5606	19.7037	24.0602	20.4582	14.3285	21.2453	16.2438	19.2851
CXCR4	8.87174	4.57827	55.0485	7.04594	40.6005	8.1296	25.5459	6.84432	9.45996	6.95291	3.42885	23.1493	2.74284	30.2592	26.3087	26.0435	9.47006	5.71344	10.4991	14.079	21.3448	54.3271	6.31836	19.3089	14.1405	18.9688	30.6852	24.4852	4.67406	16.7921	5.11716	30.6866	23.4731	5.80866	8.13204	4.03551	6.08504	7.55784	45.3882	34.7433	2.79941	8.26645	7.56912	8.53016	18.7333	5.00633	13.9283	8.07939	9.32462
DAPK1	7.56299	13.8072	6.72012	9.11937	8.02378	8.65811	10.6887	10.2503	10.3778	10.8553	6.9133	11.1572	16.7177	5.31991	9.61774	8.71351	9.25509	9.15941	12.5127	8.51885	4.88044	10.9364	7.77857	9.78097	10.2185	7.6775	7.42173	7.90237	13.967	8.23505	8.42188	14.523	12.586	15.0993	5.53814	15.387	10.1691	10.5524	10.4191	9.25808	15.6775	7.0608	18.2797	7.58191	13.4546	15.1889	13.1304	8.31403	9.43245
DAPK2	0.251834	0.909823	0.800349	0.185534	0.353446	0.212578	0.337824	0.186754	0.359482	0.248384	0.185188	0.227254	0.505727	0.221871	0.625733	0.270524	0.183213	0.227905	0.518817	0.282492	0.162031	0.399637	0.427054	0.261123	0.33447	0.326173	0.166234	0.265276	0.147037	0.22299	0.136434	0.391536	0.417943	0.295718	0.237901	0.515402	0.293045	0.244975	0.48295	0.342974	0.415179	0.207202	0.192273	0.292667	0.329052	0.494222	0.335653	0.208619	0.226905
DDIT3	17.3011	16.0051	10.1429	11.3803	10.18	14.2814	20.9418	9.52876	13.1447	13.9706	10.2938	17.8387	37.2532	8.17669	19.5379	16.6037	13.5599	19.0218	16.6293	19.6816	12.3571	25.36	16.2577	11.259	44.929	11.5569	23.0783	12.3796	15.3647	20.6899	14.0004	12.145	19.7368	17.9312	19.2889	16.3053	18.8554	11.5269	17.2401	13.7685	15.0967	14.5831	28.3713	15.5493	19.5198	13.2018	30.029	13.149	13.5133
DIRAS3	3.69711	5.47842	1.57536	4.59574	5.31968	5.36444	8.95836	8.47249	5.0858	2.96413	5.85785	8.48615	1.92536	3.76874	5.07933	4.61412	7.004	4.58205	2.53822	6.51079	5.43337	5.63594	4.29186	4.90823	6.91251	4.82096	5.62723	4.12473	7.72867	3.25545	6.81485	3.38653	4.79406	3.72455	5.52266	2.10146	6.86974	4.09638	5.45722	6.52411	0.700357	4.32789	2.52916	5.74414	4.47511	2.00829	3.24055	4.83899	5.28594
DLC1	3.23219	6.77336	7.30893	5.6657	10.0987	8.81581	10.9805	6.52554	8.95353	3.35143	4.49446	8.80006	9.39563	5.27533	10.1679	14.0986	5.10516	8.21896	5.64282	7.72204	3.25827	11.9036	10.0086	6.57523	4.11606	7.36089	5.60994	6.30275	2.57059	9.13694	6.09402	10.791	12.9233	5.10317	8.53001	8.21285	8.15953	9.24729	9.71368	9.35509	7.9325	5.12542	6.55901	5.9447	7.4545	6.26625	7.98928	8.1408	5.74047
DNAJB1	26.4866	33.4685	33.9608	38.4031	27.9317	33.4301	82.8764	36.7041	30.2166	30.147	46.3573	39.1992	72.416	31.1234	43.5821	32.752	26.1199	48.1345	33.0129	38.9954	35.5986	55.5831	39.9426	30.0072	37.7205	43.1409	42.2249	37.7703	40.5322	45.1135	27.8854	25.2434	43.5076	29.2877	31.3821	54.6564	32.1627	55.3796	33.915	30.6297	34.0961	35.3358	60.484	41.0657	53.6986	30.53	92.4467	33.8405	49.1516
DNAJB9	45.0938	18.0287	47.9514	34.3208	31.2689	22.6923	22.9406	26.5394	19.1766	16.9136	29.3608	27.4422	14.6262	40.5848	21.9553	21.7953	24.5835	28.9059	22.2409	30.0373	49.1045	38.1614	24.0181	20.6085	21.5976	26.9278	29.2042	34.909	16.1336	33.4873	29.3791	14.264	18.9254	16.7459	20.7831	13.6835	17.6675	26.6237	18.2886	29.6809	9.68658	40.6375	15.5323	34.9362	14.5358	17.7303	18.5609	29.1831	29.1969
DRAM1	15.1955	28.8822	23.4304	16.0072	11.5034	7.98646	15.4589	10.5856	8.8267	19.7647	8.93966	14.7801	17.4521	18.9299	15.2845	15.8816	10.7311	12.5081	23.9875	15.9622	11.461	16.5546	11.7825	22.7118	11.4629	10.4062	11.1271	18.3577	16.1452	13.8845	15.5076	11.1028	29.0198	22.9663	8.24902	12.8706	7.63431	15.3168	13.368	12.0903	10.415	10.3966	12.0085	13.0175	9.81017	23.1254	10.2705	9.35875	12.2352
EDEM1	7.25185	8.12498	7.78391	11.0467	7.80718	7.21865	9.89861	8.85005	7.90672	8.25714	6.35519	9.4716	7.24942	7.64651	8.80071	10.4892	8.49017	9.16937	7.33121	7.65749	6.35269	10.1447	7.52935	10.2749	5.80503	6.87608	8.27874	8.53319	7.41332	9.69278	9.44454	8.65171	11.8751	6.91678	8.70363	6.68141	7.00269	7.75939	8.27074	11.0116	8.69569	8.96532	7.66117	8.43584	7.13057	8.3272	7.21996	7.8353	7.27693
EEF2	418.64	436.034	815.352	390.605	414.271	533.186	475.386	587.419	395.476	431.43	496.24	427.478	436.573	577.116	470.285	440.574	549.512	423.641	469.227	423.37	484.059	423.934	447.041	584.827	457.11	430.397	565.245	393.14	408.131	434.99	432.458	584.471	522.484	498.497	482.485	441.791	515.131	346.031	474.264	419.112	500.973	467.836	379.087	559.787	437.871	382.461	457.93	436.482	535.796
EEF2K	2.38564	3.77284	6.21457	3.06172	3.39155	2.52076	3.01815	2.68944	3.14334	2.30029	2.61136	3.8355	2.80561	2.18152	3.53262	4.8944	2.54731	2.82687	3.6041	2.60806	1.9986	3.60755	3.24172	3.57267	3.34857	2.22819	2.4013	2.44206	2.72644	2.98722	2.44531	5.42803	5.22854	3.23907	2.86709	2.86861	1.95043	2.1649	6.85629	3.6994	2.47795	2.48109	2.74402	2.35348	4.09235	3.46149	3.09388	2.77159	2.80085
EGFR	5.49726	18.9823	24.1845	7.07808	7.4333	7.18164	10.5351	9.41802	7.992	10.0451	6.90377	9.29303	13.0665	6.24159	9.79057	11.9031	7.47387	8.54174	10.8666	6.47047	4.1078	8.25635	8.38384	10.2755	7.01921	6.23184	7.27207	7.17708	11.3973	7.48887	8.14672	12.1226	12.3956	10.663	6.27455	14.3915	5.73633	9.30741	11.0768	8.63918	20.7607	6.28173	10.8445	6.37734	9.46867	21.1199	11.154	7.54752	7.69221
EIF2AK2	4.53167	7.84151	7.4526	7.97827	5.46402	6.86833	8.4512	7.24842	8.31589	8.60181	6.23514	7.23011	5.67385	3.89527	7.3889	9.59577	7.007	7.44856	6.15952	6.89397	4.81296	12.7167	7.73155	7.49977	5.1927	6.07736	5.64466	5.26466	6.97177	6.2303	7.44169	8.01061	8.7947	5.74139	6.21817	6.18228	6.63843	6.83185	7.39056	10.1071	8.92742	4.21353	7.06602	5.87788	7.06442	8.61756	7.62007	7.02788	6.48703
EIF2AK3	2.11991	5.43736	5.42811	3.38488	4.67169	3.5238	6.21034	4.42863	3.95532	4.04333	3.14512	6.12655	8.8715	4.07061	5.94183	7.82597	2.65935	4.50085	3.76241	4.46613	3.53023	6.4383	4.66088	5.50649	4.92737	3.4136	3.66304	4.26873	4.37153	5.64569	3.62542	3.70037	7.21079	3.6866	4.92865	10.2145	4.23146	5.24415	5.47225	4.36972	4.44576	3.64753	5.49667	4.32542	4.06448	4.86118	3.71221	3.32471	3.33283
EIF2S1	8.58781	11.3775	10.4116	9.95315	9.9953	8.49872	11.1326	10.1366	9.34964	10.9742	8.75321	12.3261	8.58419	11.5697	10.2846	14.6798	8.69337	9.72348	9.98265	9.95267	9.82093	12.8635	9.92228	11.0875	9.42663	7.99379	10.3801	11.5305	11.1257	12.414	9.1204	9.01392	11.8543	8.59753	11.7061	9.94309	8.526	12.838	11.3858	10.2136	10.3167	9.064	10.6325	9.77478	9.19476	11.2429	8.32921	8.73772	8.19136
EIF4EBP1	12.3704	10.342	40.086	5.57223	10.1574	8.07216	8.94813	7.92589	6.52304	13.4745	8.58449	9.23342	8.4761	9.66684	7.51139	7.14969	9.74263	7.87047	11.2715	9.66148	9.84732	9.44368	7.01014	12.4729	10.7852	7.55408	11.4363	9.67391	6.9599	11.3154	7.74011	9.34791	14.6812	13.3337	14.2928	10.4496	9.05058	7.24787	8.86077	6.79338	6.0917	9.47726	8.20964	8.00163	8.75649	9.52529	8.32868	6.36534	8.28037
EIF4G1	26.7995	32.9686	52.6071	40.1597	36.4169	35.1173	39.1837	42.0721	29.9361	34.3341	33.0904	47.2907	38.2582	21.9963	38.1177	44.9346	39.0306	43.6148	28.9062	34.0131	24.2856	29.8179	33.656	48.8409	27.8585	28.4317	34.2629	27.2469	37.5578	37.3402	37.509	41.7418	54.9018	35.4215	37.5565	41.6196	36.5105	33.7756	36.3445	39.5888	44.1596	36.9864	42.6713	36.0575	39.3218	35.4526	35.5406	34.2286	40.7631
ERBB2	25.1863	49.6027	9.26725	29.6035	20.224	28.9902	31.3622	38.28	29.5707	45.4369	28.3393	40.4156	47.8632	17.4441	29.8993	22.9879	34.6577	33.2152	43.3656	26.5643	17.0087	23.2168	28.5353	34.4754	43.7507	22.5576	29.8106	24.6158	51.0511	21.9021	38.5787	37.6487	28.1301	61.2364	27.4648	47.6875	31.6838	29.1371	26.719	26.03	51.6622	22.7054	57.3313	35.8464	44.132	49.5987	36.201	28.1758	41.9524
ERN1	1.50613	1.95867	2.96792	2.41566	3.45743	2.16118	2.76714	2.33	2.0145	1.32428	2.14519	3.32524	3.5882	1.99004	2.60484	3.77084	1.86632	2.35076	1.72526	1.76066	1.9617	3.02888	2.13609	2.65076	2.09352	1.65653	2.47421	1.83651	2.17966	2.38982	1.89407	2.71479	2.87774	1.86408	2.32275	3.13926	1.9954	2.3213	2.96334	3.10235	3.52276	2.35676	2.79997	1.80061	2.47252	2.15084	2.99017	2.20377	2.23009
FADD	4.87155	5.03379	4.46806	3.52867	5.53321	4.13511	4.4098	6.13421	2.68037	5.09037	4.58137	5.00556	3.57548	5.55498	5.07943	5.09774	4.96392	4.30634	6.17991	5.29441	5.87867	5.92416	4.20178	6.83622	4.06358	4.11957	4.66653	4.85959	5.75517	5.5866	4.92279	3.88554	7.80531	8.01711	3.81669	5.46556	4.27672	5.75931	4.38012	4.41628	4.47813	5.64315	3.56791	4.69348	4.11783	4.2241	2.70027	2.87222	4.68447
FAS	4.53938	7.41437	5.30783	7.22736	5.4404	2.32748	7.26596	2.73209	2.79357	3.27886	1.59485	9.18539	2.84483	9.74775	7.57573	6.37221	2.82992	3.08855	2.99264	5.32781	3.84552	10.9325	4.26114	8.24617	3.3935	3.68444	3.59703	6.57024	6.7871	4.22539	3.40006	3.78544	10.076	4.66199	2.24763	2.88257	2.37838	6.58056	6.72608	4.88174	2.49643	5.43752	2.81655	2.56269	2.39758	3.27003	2.33747	2.47591	2.94206
FKBP1A	40.502	58.1625	121.532	40.4283	70.0259	39.7071	72.1383	51.2599	44.7545	61.4193	35.9775	65.1646	55.801	61.7415	66.7826	104.948	49.5541	52.0683	66.9499	55.2808	45.9877	66.163	51.9354	100.005	78.498	54.9606	49.0414	64.2846	60.5071	83.8384	49.1894	59.2927	91.472	80.6012	48.779	63.7338	46.3477	56.0712	73.365	49.2214	45.6559	38.1607	63.189	56.3401	47.5277	59.252	41.263	36.2883	39.0926
FKBP1B	2.54325	4.52592	2.3589	1.134	2.02745	1.297	2.67955	1.5618	1.40353	4.58315	0.95483	2.95392	4.37459	2.13624	2.20317	1.7231	1.47693	1.26128	4.31264	1.92339	1.03991	2.56006	1.18274	3.51448	3.92279	1.32847	1.69033	2.10822	2.49885	1.43021	1.39092	1.72496	3.38208	5.87052	1.63954	3.99501	1.64386	2.4333	2.07909	1.43919	2.23121	1.15723	3.11524	1.30245	2.172	2.56886	0.942421	1.15322	1.10027
FOS	38.8445	319.881	56.7073	70.8816	187.887	136.44	149.861	88.505	115.093	162.739	8.62224	146.26	158.866	31.2232	423.956	41.6908	127.109	212.886	302.643	166.383	36.6712	95.3568	48.2365	123.93	236.063	60.6977	121.598	330.129	128.986	58.4377	165.97	246.795	31.2034	203.351	78.7938	114.708	162.135	729.639	723.572	135.029	430.836	53.1016	327.261	69.666	322.403	389.499	761.942	487.195	374.332
FOXO1	6.84914	8.9243	4.83012	10.6242	12.5531	11.4129	12.6897	11.3926	10.3926	7.23703	12.2172	14.0305	13.0259	11.2081	13.5294	13.9984	9.86497	11.0115	7.13076	9.10417	9.84621	15.1662	11.7627	9.57135	9.86082	9.98154	10.2933	9.6159	11.125	10.1181	10.8303	12.9294	9.26044	8.03593	13.3044	16.4476	12.2913	10.8233	13.1525	13.2257	13.4659	9.56029	10.8882	10.4772	9.62157	8.85582	8.01334	10.7678	9.42576
FOXO3	5.78465	8.92844	8.42738	9.13298	12.6504	11.0017	10.474	8.76789	10.2605	8.8158	12.5953	11.2629	14.0923	8.18189	9.59386	14.9935	9.51304	8.35852	9.20018	8.02684	8.56308	13.5281	9.90415	9.47486	7.5046	8.30634	9.49088	8.31071	12.1025	11.0251	9.04205	17.2364	12.8642	7.96771	7.1037	11.5914	8.07139	15.3327	13.1216	13.0325	16.9677	8.88603	13.807	8.4512	10.6154	8.10554	9.86996	10.0191	9.6293
GAA	18.9598	25.1828	23.4494	16.6006	25.71	15.311	27.5171	26.6957	18.184	32.2377	16.7918	30.623	29.4957	25.6113	24.7317	21.9763	24.4461	21.0526	28.45	18.9233	22.9551	16.0999	20.7377	31.1061	30.8121	16.882	22.599	16.4318	37.9496	28.9672	25.2566	41.3619	19.2907	40.2033	22.2193	40.9355	22.5168	22.0418	20.2332	20.7358	41.5549	20.2548	33.3895	31.1032	36.97	27.218	28.1445	14.5002	26.805
GABARAP	32.2434	34.3922	21.0945	21.6188	27.1683	24.0482	27.6504	27.509	23.6261	36.6921	21.612	28.0949	32.2198	30.452	24.9626	28.3821	27.7178	22.1605	45.9546	27.2755	31.1465	31.1613	21.3374	29.827	38.3869	23.3936	25.76	29.3305	44.0139	24.5179	24.7641	24.8103	28.3416	34.626	24.9236	36.076	26.9673	35.5574	29.8719	23.0126	30.0651	25.6415	32.5376	33.6761	30.5924	40.583	24.0496	21.1961	24.4549
GABARAPL1	57.4879	65.8436	47.9812	96.4953	74.6109	89.2209	101.805	87.4816	82.8343	75.6343	87.9107	72.3767	105.547	44.3329	71.7309	66.4836	81.4358	98.4518	94.9445	78.6515	59.5709	56.7516	86.1111	79.3249	110.571	73.197	105.862	70.5405	135.81	82.249	117.89	61.6163	53.3696	104.174	82.2794	112.657	121.223	100.345	56.0404	66.3291	77.1241	97.3785	129.029	72.6061	87.4971	61.2838	70.3508	75.5499	73.2591
GABARAPL2	54.3708	44.8396	22.6569	28.2011	32.3524	31.0442	36.9382	32.875	36.5162	54.5406	29.3199	35.4782	48.3565	36.5491	30.121	29.2469	31.3591	29.5594	58.1035	36.4574	39.5088	36.3427	32.0183	28.0508	58.6621	30.1892	33.6022	36.1489	40.9001	29.8436	31.4135	28.0334	28.5425	50.1331	31.0267	52.1215	33.433	38.8291	33.9187	30.1804	39.5158	28.2124	44.7125	32.704	38.9731	46.3237	29.8339	26.0376	27.7969
GAPDH	529.213	565.709	1910.06	501.38	479.241	493.284	449.064	533.202	440.513	663.256	494.063	425.862	482.544	523.441	457.073	447.533	506.455	406.719	478.295	474.491	588.319	330.18	367.753	502.698	490.888	375.607	625.249	497.935	776.684	453.553	477.596	430.229	589.056	648.548	580.401	601.62	528.388	603.094	316.214	376.459	374.08	631.104	383.6	544.165	367.486	483.179	419.886	474.923	467.513
GNAI3	2.39976	3.47828	3.20093	2.94769	3.22346	2.96085	4.04481	3.3139	2.97232	4.05245	2.39554	4.32019	3.87648	4.03169	3.50862	4.97344	2.84565	3.23575	3.78825	3.26967	2.96533	4.67493	3.05664	4.14494	3.75163	3.05318	3.25805	3.6977	4.17202	3.84967	2.96497	2.97837	4.83109	3.88356	3.20708	3.54328	2.89357	4.1269	4.13411	3.12071	2.99388	2.64383	3.7165	3.30716	3.38183	3.91563	2.76154	2.56389	2.61052
GOPC	5.86646	9.53762	7.27097	9.49076	8.18506	7.85181	9.58923	7.67412	9.16348	9.05092	7.73241	9.16047	5.96035	7.8018	8.52487	9.30311	8.17087	8.40771	8.85377	7.48254	5.30732	9.41903	9.18	7.56005	7.76081	7.10081	7.77827	8.62788	10.4946	8.77506	8.0764	7.71486	10.3627	8.38479	7.88901	7.37108	7.26434	8.484	9.5419	9.51854	9.21762	6.32818	9.05786	7.43196	9.1131	10.819	7.61533	7.8556	8.00481
GRID1	0.262193	0.242884	0.31507	0.243769	0.303728	0.176875	0.141475	0.197488	0.181081	0.109597	0.280767	0.346608	0.303402	0.161596	0.325367	0.50894	0.190146	0.208765	0.344419	0.334968	0.0519063	0.292341	0.396295	0.171284	0.179287	0.162559	0.0775872	0.221796	0.101272	0.239976	0.147845	0.270466	0.61538	0.284199	0.188931	0.36671	0.172599	0.106765	1.11654	0.694896	0.141406	0.18548	0.228443	0.150602	0.267012	0.437205	0.28837	0.123868	0.138691
GRID2	0.0291996	0.0361042	0.0313624	0.0243161	0.0393786	0.0569053	0.0319205	0.063613	0.063249	0.00540925	0.010558	0.0921982	0.0602331	0.0443865	0.0152422	0.0817434	0.0568775	0.0313025	0.076091	0.0393968	0.0273266	0.0319651	0.0203215	0.0193231	0.0240421	0.0441936	0.0149035	0.0229705	0.0183272	0.0162434	0.0277038	0.113074	0.0414563	0.0374049	0.0406901	0.0454584	0.022253	0.0451667	0.0900137	0.0990354	0.0579016	0.0275712	0.0528991	0.0274451	0.0462856	0.0345257	0.0497547	0.0554296	0.0160278
HDAC1	18.5923	48.5086	19.7581	17.2561	21.8792	19.7045	24.9531	23.7184	23.0953	39.7159	15.6339	28.0348	40.6471	17.8589	25.6714	29.4179	25.0252	21.8157	34.4442	20.5219	15.5572	24.1225	21.9986	25.0902	31.8686	20.2736	18.1645	21.188	46.2615	20.8235	23.6447	25.5598	25.2026	40.9085	24.4267	44.9526	23.0662	31.9231	25.58	23.8622	33.1086	16.6921	36.2714	22.1362	29.3434	43.4975	27.0893	16.5797	20.4963
HDAC6	14.2929	6.81613	20.6205	20.1306	9.68676	11.9726	7.5325	14.4404	9.6174	7.8216	14.7546	6.9288	8.98303	10.3422	9.99552	7.40981	13.8939	14.431	5.99585	13.4522	12.2934	5.49095	11.5031	8.70159	7.16962	10.5482	10.5545	11.4094	6.92858	11.2484	17.6382	8.30316	9.07443	7.43987	10.0582	10.0439	12.5002	8.69167	5.87566	12.5688	9.34953	17.5739	9.40226	15.1133	8.78164	5.7854	8.41332	13.2817	16.7795
HGS	5.05133	7.33176	5.48305	4.49372	5.86138	5.90089	6.33518	6.22314	4.96531	5.74083	4.68282	7.3618	7.98097	3.6413	5.95583	5.36288	6.34501	5.67948	5.50766	6.00681	4.09827	5.40168	5.29035	6.70769	6.21813	4.70332	5.40754	4.16845	8.18233	5.03183	5.17138	7.26267	8.85754	8.11478	6.04291	10.1951	6.36604	5.28621	5.23835	5.23081	7.51089	5.00959	8.04188	5.63701	7.45055	6.49341	5.67116	3.31288	5.85596
HIF1A	27.5639	142.32	35.4277	36.1131	56.4609	33.2945	97.5781	45.5769	45.5942	101.784	31.0247	113.347	122.965	61.2477	51.9649	197.393	37.7178	62.0421	79.3918	39.8085	34.8221	82.4621	46.8947	109.706	70.3163	38.3519	48.2517	48.5941	122.714	98.8952	43.8503	55.7898	89.6856	109.668	47.9731	121.9	39.1538	108.12	55.7013	51.5716	71.7247	37.6981	131.94	35.3017	58.5997	123.287	61.8609	32.5692	33.2126
HSP90AB1	192.586	317.382	336.409	305.715	300.038	265.601	359.277	292.044	282.104	278.984	354.858	396.439	360.978	275.242	354.435	404.785	259.798	348.433	368.553	352.534	231.985	289.183	320.712	385.302	330.265	336.768	306.415	334.414	398.572	370.76	255.727	243.129	464.584	337.757	373.743	352.25	305.684	402.386	342.509	325.226	286.401	233.01	396.038	336.483	298.189	343.459	325.167	288.038	366.191
HSPA5	78.6085	99.1802	157.915	122.936	167.109	105.798	162.198	114.328	107.793	156.582	112.057	256.556	164.879	108.997	146.495	207.907	111.628	185.926	170.713	128.325	103.352	356.422	140.041	203.5	174.041	147.584	107.909	141.831	236.455	172.233	113.097	112.899	208.131	197.576	161.74	116.067	102.803	214.67	189.012	117.204	121.212	104.085	266.86	174.696	142.429	130.652	125.11	123.799	156.882
HSPA8	369.016	196.696	189.644	364.857	238.402	256.104	267.825	275.575	227.867	213.608	328.578	243.627	269.438	338.803	257.079	244.477	222.591	342.203	284.767	369.901	407.375	258.416	271.92	331.93	214.843	323.552	267.623	363.136	301.672	346.434	208.704	169.603	374.195	187.298	256.556	336.112	250.531	423.068	204.154	277.912	243.595	309.923	281.831	361.941	220.928	240.369	282.396	305.891	356.17
HSPB8	10.6549	9.15809	55.6562	17.0224	53.5674	17.614	42.7364	21.6717	15.9759	4.48017	11.9902	21.874	5.23912	35.2625	34.783	40.5845	17.6429	24.0114	6.50682	28.7369	30.7125	43.5979	23.9103	51.3161	16.2766	21.5569	29.3693	34.8732	5.36232	46.437	19.1948	13.1269	63.8772	5.43888	14.392	6.453	17.2333	13.5645	47.6094	29.1311	2.64374	35.2351	10.3547	22.0612	6.93945	3.87577	10.7456	12.0176	13.9901
IFNG	0.0654518	0.0695479	0.141771	0	0.0551677	0	0.307444	0	0	0.0500156	0	0.0177603	0	0.0513013	0.0402668	0.0209951	0.0560967	0.0257273	0.0299388	0.0693856	0	0.0875729	0.0250531	0.119111	0.0329334	0.0129723	0.0306227	0.0442485	0.041081	0.0222506	0.012198	0.0129076	0.0283939	0	0	0	0.0171465	0.0185611	0.0504421	0.0100078	0	0.0318665	0.0250831	0.0338355	0	0.0304033	0.0117961	0	0
IKBKB	3.09102	5.045	4.30815	3.22284	3.29441	2.8109	3.82842	3.18245	3.33525	3.25845	2.21265	3.81132	4.22633	2.28036	3.70108	3.87864	2.59917	3.45677	3.6837	3.65786	2.40455	3.41431	3.43324	3.85223	3.83734	2.58631	2.59852	2.49498	3.12393	3.11801	3.11972	3.99832	5.52078	4.34278	2.69528	5.25312	2.90861	2.7964	3.79678	3.70958	3.9698	2.53853	4.15446	2.76918	4.48009	3.62874	2.80224	2.45305	2.75602
IKBKE	1.03567	1.8144	0.964815	1.15177	1.5385	0.840126	1.88863	0.90221	0.800596	2.13723	0.765306	1.63766	1.61175	1.86252	1.74221	2.03713	1.03183	1.07456	1.4749	1.49361	1.27858	2.56742	1.3885	3.21459	1.43903	1.43373	1.50204	1.39037	3.88705	1.33683	1.35991	1.63394	3.24309	2.00838	1.11746	1.33044	0.881433	2.37644	1.6409	1.64627	1.30645	1.21836	1.5097	1.14145	1.3886	1.61176	1.22036	0.393907	1.08454
IL24	0.161132	0.20546	0.349019	0.138377	0.774142	0.0785053	0.953671	0.186842	0.114762	0.138522	0.0640888	0.863531	0.0914058	1.05247	0.801307	0.956206	0.12947	0.253347	0.23954	0.142347	0.349896	1.42829	0.161902	0.998829	0.243231	0.407182	0.427202	0.789765	0.404541	1.2188	0.112611	0.317766	1.1359	0.299584	0.164663	0.306599	0.0422121	0.548336	0.915834	0.640578	0.156906	0.130751	0.550612	0.215186	0.195111	0.049899	0.159721	0.0865904	0.121613
IRGM	0.0438795	0.0298404	0.082948	0.00669914	0.0710111	0.0085514	0.0395738	0.00678408	0.00909145	0.0581203	0.0558484	0.0571519	0.0132755	0.100886	0.0287949	0.0112603	0.00752155	0.0827895	0.0267616	0.0372134	0.0112928	0.0469678	0	0.0558974	0.00883154	0.0069574	0.0164238	0	0.0936397	0.0298341	0	0.0207681	0.0304569	0.130532	0.0269045	0.00556619	0	0.00995485	0.0405802	0.107349	0.0205098	0.00569695	0.0717481	0	0.0170024	0.0326123	0.0253063	0.0215591	0
ITGA3	8.6861	18.252	34.4851	18.1069	42.3895	31.8506	47.9174	24.7321	26.6562	18.677	15.985	70.0844	14.1455	18.066	43.2308	30.9202	27.3857	32.6849	12.6214	25.5596	13.3411	37.5723	33.1765	59.2033	26.4711	29.7452	24.5067	27.021	23.6643	29.1238	22.0007	19.3175	58.6111	37.356	26.6708	13.9291	30.0675	14.6965	40.0459	23.2647	15.1141	14.3923	22.1347	24.8326	15.8331	10.6173	14.0173	14.5254	21.8955
ITGA6	20.2839	12.79	54.5162	33.6878	34.7933	28.0944	37.0764	29.7615	27.2898	27.4103	35.632	28.5822	19.2315	29.717	33.8878	34.2931	26.8341	33.089	20.7584	27.4224	22.6783	25.8292	37.3879	30.64	26.4144	26.4901	34.0899	34.7028	20.1606	36.5098	30.608	28.7983	39.7743	25.5822	28.9555	19.2718	21.6709	26.1268	26.0429	32.0065	28.9058	28.5649	27.6877	34.3861	19.2403	27.3479	26.3689	25.552	28.83
ITGB1	27.3338	67.7337	82.3363	44.0645	82.9493	48.1484	75.3619	49.3623	52.0821	63.3124	33.0504	73.99	60.3927	78.2094	70.403	139.917	38.7266	51.9014	66.1364	48.0718	32.9034	79.4212	58.4963	86.8873	54.4203	52.2163	42.4859	64.93	44.5822	73.2469	45.953	83.1662	77.9876	71.3627	42.4378	71.6979	35.9528	61.6505	102.013	61.6956	59.8409	46.8201	66.5459	48.1202	42.0021	62.61	45.3449	40.9092	37.5129
ITGB4	2.84757	9.32668	5.41915	2.4865	5.48009	3.72836	6.33399	5.30494	3.50881	5.11037	2.11511	14.7882	6.18789	4.37146	7.11385	6.72869	4.38847	4.21303	5.42765	3.62913	1.87765	8.97674	3.61745	9.21353	6.48475	2.99366	3.8948	3.29857	8.86798	4.58569	3.81702	12.3335	7.00014	10.0152	4.83789	7.18139	2.9654	4.80839	14.9393	4.9616	10.0191	3.58989	9.04502	3.67152	8.64655	6.20931	6.12022	2.53457	3.57455
ITPR1	5.9226	7.97234	5.39657	11.902	10.2498	12.6687	12.9029	10.4591	14.1461	6.42181	14.863	9.49493	7.68116	4.90544	10.1488	10.8773	9.74285	12.6486	8.44308	9.2846	4.9522	6.75593	13.8032	7.15825	8.32121	9.74481	10.9712	6.55764	7.04665	6.46585	11.9226	11.8688	7.34051	5.78103	11.7999	6.23071	12.7947	9.46287	11.062	12.4107	14.6807	5.47811	9.11996	8.3414	9.73672	10.2244	14.4668	12.1842	13.5968
KIF5B	20.7066	44.7402	23.3131	31.5898	30.0562	29.6045	36.7369	29.8198	32.3805	34.5781	27.041	38.9354	40.2615	26.3783	31.8232	41.9718	27.2687	34.9536	34.8005	28.288	19.9338	32.6462	31.4493	30.7028	30.6119	28.8018	27.5375	30.6384	31.7082	33.7417	31.9895	33.2406	37.685	25.0689	31.1583	35.2833	28.2901	37.9003	35.3373	36.9127	45.8353	24.0022	35.7791	28.7717	32.0753	41.923	35.402	31.3242	28.4409
KLHL24	7.22781	10.0848	11.1283	10.9134	7.22435	9.41601	8.866	8.41399	12.2233	9.48294	10.689	7.75251	7.70621	9.10668	9.16073	10.0485	8.50715	8.39366	9.40653	8.65309	6.21731	8.33889	9.87231	9.24555	8.57442	8.17412	8.44139	9.91163	12.152	9.88179	8.10529	8.78768	9.36961	7.97957	6.00407	9.48573	7.09588	14.3969	7.02103	8.91874	12.952	7.29751	9.91061	8.63935	8.65396	13.6095	11.5988	9.24593	9.55503
LAMP1	59.245	76.8421	42.9716	79.5362	96.1981	71.6914	77.0362	86.6789	57.7776	77.6941	65.2253	78.1715	86.3012	75.5867	81.9039	86.1626	77.6805	77.2094	71.3	71.5799	56.2435	74.292	72.3548	96.7184	69.71	71.8486	77.5194	79.4061	90.3236	82.7985	92.7335	80.5798	81.3192	100.792	67.5165	103.576	63.1992	71.4878	84.7495	76.0849	79.2959	104.873	78.606	96.237	72.3606	70.0211	67.9277	62.4187	82.2127
LAMP2	49.1435	44.2555	90.3752	60.9183	51.1824	38.721	49.2974	54.1993	41.0692	52.4158	37.9508	45.4209	46.2032	75.4208	42.3826	70.5754	43.0251	43.3774	52.0608	49.5101	48.1641	48.5402	37.6243	51.9986	43.608	43.2491	48.6941	66.3959	45.0498	54.5974	53.269	41.9297	59.1166	43.0763	39.661	51.8717	31.7499	52.7221	38.9966	48.7314	47.4121	59.4749	43.8089	55.0532	40.2126	54.305	44.0961	41.1107	47.2766
MAP1LC3A	13.1547	10.6247	13.7735	7.17516	13.0956	10.7351	16.1858	11.3233	8.8469	8.77597	9.23165	16.0092	11.5496	9.81131	13.8432	9.23033	11.8853	12.8669	10.8513	12.3266	12.8376	13.8475	12.9194	21.4899	23.9493	12.1506	14.3168	10.1794	12.0122	12.2433	11.6446	10.9836	17.2526	24.5895	12.6801	12.8632	14.4484	7.65985	15.8216	8.63363	9.49881	9.00946	13.5937	13.5813	10.1024	6.99854	7.48552	5.7658	10.8362
MAP1LC3B	18.5159	22.3787	32.4565	17.1523	18.2144	17.5305	23.3716	19.7593	18.5754	22.2345	15.6451	21.9496	35.2387	19.766	19.5454	21.9959	14.5673	17.0038	24.1387	19.3239	17.7635	22.6859	17.7471	22.1419	26.0058	14.8308	18.9219	20.3203	23.6245	21.4035	17.4102	17.9763	21.946	20.6823	17.3729	27.2564	18.0778	27.9774	20.3667	16.4798	21.8233	15.5482	26.5912	18.6472	20.8312	23.0542	19.5138	16.7487	16.7115
MAP1LC3C	0.13489	0.157665	1.27496	0.592075	0.932306	0.03286	1.44464	0.377997	0.192143	0.103078	0.134128	0.549036	0.0425108	1.53305	0.622398	1.29807	0.173416	0.31813	0.164537	0.417077	0.216972	2.3688	0.697037	1.15068	0.729634	0.548063	0.115703	0.620108	0.476237	0.481495	0.339376	0.438925	1.3459	0.263993	0.344615	0.513333	0.123681	0.353839	1.59834	0.257814	0.157623	0.766197	0.163698	0.11622	0.315782	0.114874	0.255263	0.144977	0.237551
MAP2K7	5.73691	5.10397	6.41951	4.89383	5.48263	6.53003	6.74842	6.27046	5.38138	5.02626	5.68832	6.61363	5.02771	3.89039	6.97782	4.88578	6.88902	6.86404	5.50702	6.78393	4.95475	6.06398	6.51515	6.64763	6.70107	5.22068	6.32153	4.75362	6.48434	6.53697	5.70895	6.30693	8.07628	6.85942	6.10409	4.42981	6.94524	4.52369	6.5618	5.93955	7.61055	4.99406	6.31214	6.82989	6.38914	5.51091	6.1045	3.51146	7.27787
MAPK1	12.4141	21.8618	31.3723	19.66	14.6077	17.2308	17.1193	18.0351	20.1859	25.0676	16.233	18.2009	20.2321	18.4122	16.0671	19.0211	17.2909	16.7253	24.543	15.2806	12.8298	15.6947	16.3328	16.5589	13.5933	16.033	15.9841	16.6828	19.8352	17.585	17.1953	18.1208	18.6144	18.1757	15.3703	20.9494	16.4832	21.6921	16.2647	17.5014	22.7465	15.6061	19.7907	16.276	17.9222	26.175	19.3334	16.6672	16.4362
MAPK3	16.975	24.7548	27.6008	12.4024	17.9368	16.6837	16.4361	18.3461	17.1296	22.891	12.9675	20.2701	27.1166	15.4751	20.0734	18.5326	17.831	14.4893	23.8962	15.8128	12.7426	18.8457	16.4841	17.6503	21.5269	17.1094	18.6611	14.5305	19.0246	14.3595	16.9021	22.0846	19.309	29.1458	17.4358	24.3135	18.3742	18.0139	22.0075	15.3257	21.6914	13.9392	22.9821	19.316	19.95	19.2608	18.3384	13.8649	15.836
MAPK8	4.64462	3.26381	1.79819	5.04334	3.39844	3.6384	4.60763	4.28007	4.47069	3.87927	4.26438	3.33612	3.95658	4.42351	3.92197	4.36337	3.869	4.41286	3.68858	4.8638	4.23483	3.56414	4.70128	3.81565	3.90339	3.35893	3.92521	4.55494	3.48422	4.51031	4.08421	3.3128	4.12858	3.32164	3.56402	3.60097	4.18166	4.21791	3.32268	4.20663	3.96653	4.17465	3.78202	3.92328	3.94854	4.81623	4.00635	4.08302	3.93664
MAPK8IP1	6.11918	6.66439	3.86838	6.03679	5.64754	9.78785	7.61352	11.2885	10.1522	9.22144	6.58995	8.82472	6.70258	5.66855	5.19706	4.89802	10.0057	8.0176	9.15979	7.9124	7.36829	6.88375	6.91772	8.96367	8.91588	6.72572	7.32179	5.3001	7.7923	5.88434	9.15723	9.31694	9.53081	8.24703	7.63316	8.46335	11.7139	8.68623	5.8356	7.1715	10.2174	7.19752	10.4923	9.00105	11.3034	6.50006	8.69944	7.37629	9.63241
MAPK9	4.27311	6.78243	9.57826	5.94449	4.27702	4.56934	5.72887	4.85684	5.37667	7.58851	4.10557	5.02693	7.29673	4.97275	4.91271	5.22007	5.21695	4.58228	6.53025	4.72813	3.68295	4.41604	5.27661	4.74682	5.55443	4.20105	5.14945	5.01933	5.55963	4.80893	5.0934	5.25981	5.25805	6.19376	4.56461	6.91963	5.36396	5.51238	5.00667	5.12761	6.60392	4.14211	5.60646	4.43333	5.26476	7.02995	5.12454	4.34386	4.59352
MBTPS2	2.88447	3.70266	5.59898	3.72717	2.95363	2.97601	3.64106	3.90387	3.62421	4.07514	2.67281	3.33918	3.28156	4.1274	2.96493	4.63488	3.35238	2.9486	4.00315	2.96159	2.4247	3.16634	2.79955	3.54487	2.63765	2.75934	3.32303	3.71292	3.76522	3.56716	3.50167	4.17737	3.95542	2.86278	2.99102	3.33331	2.56874	4.27103	3.37578	3.66353	4.37236	3.57829	3.99844	3.31773	3.91445	4.40819	3.75808	3.26057	3.67781
MLST8	10.5113	7.10516	8.70774	6.85904	7.3738	8.38264	7.07876	9.26609	7.56519	10.1414	6.88729	7.70105	8.39672	7.62212	7.64283	5.59001	8.88251	7.93001	8.62359	9.40974	10.7081	7.09365	7.51751	9.17852	12.0719	7.0065	8.66818	6.38807	10.2955	7.94294	8.28947	8.14987	7.44396	9.52072	9.3377	8.95647	9.35766	7.6038	5.96549	7.37346	8.13107	8.39475	8.1437	9.27253	9.73873	6.73582	7.51451	6.35368	9.25557
MTMR14	7.17747	10.3171	5.03793	7.10144	6.46493	7.38098	6.45178	8.7475	8.28268	11.268	6.00976	7.15796	9.62721	7.54941	7.23997	6.16363	9.38344	6.63154	7.79584	7.97152	6.24537	7.18032	6.32344	8.23593	7.12303	6.90539	6.37751	6.98124	11.2603	6.8586	7.93943	7.95215	8.84702	10.5404	6.6987	11.0261	8.39888	8.56605	6.78426	7.79154	9.37743	8.19894	9.05711	7.67412	10.1449	8.91334	7.78764	6.33968	7.21618
MTOR	5.84466	9.02523	5.22141	9.92867	6.65677	8.48985	7.25389	9.17484	10.515	12.9799	7.1231	8.64459	13.3665	4.94972	7.50439	8.21032	8.98964	7.82685	11.7329	6.84797	4.08635	4.55911	7.07537	8.61918	5.96447	6.65308	6.5883	6.04897	7.84365	6.14861	9.11239	12.0697	8.84928	8.98219	7.16592	15.6511	7.40494	8.91315	5.85285	8.70533	21.4395	6.75019	12.5122	6.63339	10.8604	13.4998	12.1566	9.22936	9.50921
MYC	2.53027	6.59948	22.9008	2.06838	28.4047	3.41682	21.5771	9.55921	5.05675	1.95214	1.78562	17.7756	8.52924	7.19032	24.4271	23.1094	4.72429	8.93296	5.85277	17.4318	5.11041	54.9225	8.68363	30.9033	7.65901	4.16988	3.67475	12.6	4.49763	30.9845	3.68334	23.742	66.2693	8.63543	18.6362	13.6349	6.69471	25.9748	54.6774	15.7964	8.81577	8.72147	9.35574	8.235	20.1876	6.37137	17.5275	12.334	6.32892
NAF1	1.44253	2.72733	1.7794	2.23397	2.04322	2.34675	2.52033	2.1982	2.46489	2.34401	2.14662	2.77599	2.47268	2.0837	2.60798	3.01567	1.79412	2.22245	2.5003	2.31142	1.62155	2.71208	2.4149	2.09711	2.3402	2.11963	1.93681	2.17238	2.3884	2.2575	2.03328	2.18754	2.44561	2.29747	2.34675	2.53973	2.65834	2.6402	2.76013	2.39834	3.24532	1.66835	2.48451	2.19715	2.44139	2.70854	1.97226	2.03154	2.12741
NAMPT	5.7352	11.6809	11.982	5.05052	10.2919	6.53708	14.3298	7.19	6.90428	10.5448	5.54687	16.4421	13.8466	9.74552	9.21027	33.1174	4.93246	8.33695	10.2128	7.40454	7.41409	23.3125	7.36313	11.0644	10.5568	5.59967	7.26267	8.23816	13.5902	13.6016	5.93366	10.3356	37.0049	9.88293	6.98848	19.8965	6.27987	19.096	10.3591	8.11868	15.7592	6.0993	18.1189	6.26364	14.0599	9.38093	8.68504	6.69293	4.80512
NBR1	27.9519	38.8403	20.298	40.5459	27.0632	33.1103	29.2677	35.9586	34.1892	38.3006	37.8873	25.9121	32.9776	28.0668	29.7012	30.8204	38.134	30.7225	38.4452	31.2943	24.6147	25.5111	32.2628	27.7771	25.5305	28.7469	30.9127	34.3477	32.1086	30.6256	36.7283	30.9024	29.7367	27.6325	26.1315	33.7911	32.6771	33.6368	26.8871	33.8187	35.3225	32.7778	33.2677	32.698	28.7921	38.9185	28.6395	34.5667	34.693
NCKAP1	9.33314	13.4346	15.9161	13.5242	9.49969	10.4923	12.0821	11.3819	12.1295	15.7514	10.4642	12.8639	13.2813	12.5174	10.2373	13.4923	11.1545	10.6955	16.1077	10.6509	9.5068	9.97487	10.6524	11.405	10.5127	9.91936	10.6998	11.8683	10.8244	12.6872	11.4331	10.7356	12.7532	12.2003	9.45534	12.6116	10.1909	13.5313	10.7415	11.7386	13.6927	10.6794	12.3476	10.4908	11.2843	18.1654	11.5209	10.427	10.2338
NFE2L2	18.4834	42.2853	22.687	25.799	30.5189	27.1084	52.6722	28.1541	31.4552	30.5733	22.0481	41.1656	28.0023	25.9213	39.0128	41.7048	28.7576	38.3325	29.6367	35.311	20.6061	39.6801	36.9734	37.7799	34.4371	32.7527	31.1559	36.3029	49.6977	40.7267	33.7274	21.2591	43.3556	31.8381	27.6019	41.3665	38.3563	49.5632	34.958	32.9273	28.7433	19.4618	36.1209	33.5676	27.4272	35.5077	25.9021	25.1068	28.3549
NFKB1	5.82581	8.66183	9.50856	9.439	9.05516	7.39937	13.3365	9.44049	9.11397	9.68421	6.71709	12.6432	9.12764	8.15558	11.7811	15.5631	8.52025	9.59557	10.0532	9.64157	7.62782	10.8121	9.89034	14.6335	9.17076	8.32815	9.40262	9.54375	12.2413	11.8116	8.50777	9.63592	19.0081	10.8643	6.4352	10.0104	7.82708	11.2279	12.9809	9.85171	10.4366	6.68497	9.99006	8.35824	8.8946	11.0674	8.74412	7.09331	8.53272
NKX2-3	0	0	0.0449153	0	0	0.111132	0.0357146	0.044082	0	0	0	0.0412628	0	0	0.148125	0	0	0	0	0.00671687	0	0	0.036379	0.00864793	0	0	0	0.0359812	0	0.00646192	0	0.0224914	0	0	0.0194247	0.00602805	0	0	0	0.0813794	0	0	0.00485634	0	0	0	0	0.0350219	0
NLRC4	0.428958	0.28517	1.58105	0.251883	0.459828	0.257222	0.433985	0.395369	0.233585	0.310983	0.15749	0.358146	0.149745	0.793132	0.514268	1.07961	0.282805	0.350194	0.399134	0.404214	0.481217	0.912412	0.336807	0.615499	0.260114	0.348791	0.336208	0.606761	0.17604	0.553393	0.475559	0.724473	0.51055	0.172208	0.309098	0.188357	0.109493	0.380534	0.534026	0.534803	0.175652	0.467674	0.165795	0.394224	0.262815	0.221397	0.277521	0.270202	0.293314
NPC1	1.9354	2.87955	5.35954	4.10088	5.27204	3.38537	4.81744	3.95919	4.31655	4.23434	3.03677	5.98724	8.67474	3.55455	4.12026	7.56125	2.91511	4.05579	3.71922	3.21109	2.48032	4.42409	4.05071	5.38548	3.8199	2.93263	3.38082	3.78042	4.20646	5.42857	3.39293	5.14193	8.6528	4.92678	4.67133	6.13646	3.71711	5.76823	4.40627	3.86004	5.21935	3.4733	6.11811	3.24188	3.78022	3.5521	3.84294	3.31994	3.34135
NRG1	1.52361	0.631133	0.922917	1.43972	0.837555	1.10062	1.4783	2.04688	1.21204	0.615751	1.32956	1.17059	0.504785	0.875202	1.70151	1.14903	1.83511	1.64314	0.645956	1.23346	1.17499	0.842727	1.0344	1.40877	0.810898	0.95962	0.704615	2.14284	0.6725	1.15434	1.82566	1.07419	2.22865	0.476544	0.816252	0.326956	0.884934	1.08367	1.52539	1.30094	0.549601	2.08549	1.05361	1.53646	1.30549	0.339977	1.53341	1.41981	1.90858
NRG2	0.246921	0.134935	0.937707	0.262538	0.380569	0.442541	0.503708	0.368124	0.347156	0.0808659	0.343736	0.335009	0.0733707	0.285699	0.553383	0.265904	0.377908	0.433294	0.121013	0.489245	0.23263	0.401169	0.472573	0.38115	0.332795	0.436954	0.552876	0.336245	0.0691879	0.314783	0.463464	0.184345	0.570021	0.165685	0.617311	0.0866959	0.572936	0.217572	0.336416	0.388337	0.188921	0.211813	0.110399	0.413332	0.24204	0.114699	0.235222	0.249136	0.501402
NRG3	0.161107	0.440916	0.748993	0.497926	0.75249	0.344602	0.705817	0.346285	0.419284	0.108097	0.256314	0.554448	0.0614228	0.517423	0.702668	0.69577	0.340147	0.373781	0.146188	0.51098	0.227538	0.846455	0.532444	0.371847	0.347982	0.504661	0.276993	0.488792	0.125782	0.4996	0.289995	0.198379	0.698904	0.123044	0.293133	0.0299073	0.378819	0.167149	0.690456	0.485464	0.0214277	0.311201	0.0662586	0.325013	0.154795	0.204431	0.130306	0.279941	0.292616
P4HB	58.4034	64.4034	222.405	63.3424	91.6796	63.9407	79.3365	80.9815	56.8319	85.56	52.1031	87.7232	75.2647	93.6667	78.9085	95.1032	73.9756	68.3976	78.4319	71.7253	69.6453	112.919	60.3936	110.227	74.7001	62.9567	76.9556	77.6071	87.0051	74.8058	75.3195	80.2588	111.476	97.0219	82.0315	70.1264	59.9281	74.8416	87.144	67.4432	64.6214	98.6375	77.8558	86.1716	68.0434	62.5824	60.272	57.3116	70.3986
PARP1	8.40126	15.7366	13.1316	14.28	15.9358	14.9749	17.9644	16.1975	16.3353	20.5627	13.8238	18.7775	16.8161	10.8863	15.8877	17.9743	16.6359	15.5346	18.2641	13.8299	9.15087	13.7403	15.9788	18.1929	13.9212	14.2398	15.8562	15.258	19.7261	13.8663	16.1731	15.3969	18.2664	17.9285	22.0116	18.6765	16.8293	18.8674	15.2503	15.8077	18.1139	11.2305	19.464	14.7432	17.7093	19.5427	16.955	13.9151	15.2498
PEA15	35.2079	72.5192	86.5175	38.1699	94.8094	59.112	94.5803	51.7929	56.4877	57.4417	38.7987	81.0391	61.4255	70.034	88.6806	114.646	55.1342	63.9783	79.3376	68.4637	47.5997	108.184	73.8998	100.684	83.5923	66.6527	58.0878	74.0619	42.4046	76.8175	53.3395	65.5921	124.753	73.2338	53.3774	65.0691	49.889	68.4709	118.449	63.8405	50.4674	43.0045	73.2025	61.8957	49.0615	47.8046	43.3896	39.617	46.066
PELP1	4.84842	8.83543	5.5994	5.38045	6.06863	6.41633	7.49048	7.60143	5.67258	6.93601	6.1203	10.3901	8.51699	4.35758	8.53085	7.33685	7.56549	7.6279	6.91754	6.83812	4.55445	7.2331	6.19156	9.86834	7.99879	6.65451	7.21357	5.46895	10.7403	7.14102	7.42292	8.33524	9.80409	7.85912	9.41385	8.52011	8.49731	7.32156	8.80895	6.7814	9.67152	5.05748	9.35071	6.99914	9.82779	7.30078	7.79221	5.86605	8.83113
PEX14	7.69919	6.85594	5.31999	4.61746	6.57808	7.25584	6.8967	7.51042	5.85276	7.13264	6.54274	7.78608	6.24113	5.40355	7.1616	5.62671	7.70519	6.51304	6.93188	7.49648	6.3794	7.48784	6.84162	8.18635	9.05386	5.81365	7.68386	5.66119	8.08606	6.83188	6.95978	7.17572	7.88672	9.38725	7.21506	7.42833	7.7262	5.85378	7.1285	6.29619	7.22122	7.6158	7.50435	8.37992	7.96746	5.94314	6.41866	5.44371	8.31037
PEX3	15.0417	15.112	5.89908	12.7831	9.59226	10.9862	11.8845	13.6386	12.8507	17.8526	9.07572	11.8577	15.1603	12.3358	9.1527	11.2899	12.2845	10.9083	14.7207	13.3183	14.5658	9.91273	10.7186	9.5652	13.4492	8.90275	11.9796	10.9487	12.8864	10.0624	12.2561	10.1815	9.57203	11.4803	10.5592	12.9651	12.1904	13.3895	9.3872	12.3102	10.1596	12.3497	12.1545	12.5502	13.786	16.3769	10.5785	11.3918	10.5154
PIK3C3	2.85259	2.87126	2.61494	3.88711	3.24596	3.3207	3.62085	3.50917	3.76705	2.7212	3.07221	3.17598	2.69144	3.13756	3.43399	3.79319	3.2752	3.62853	3.39306	3.45777	2.48487	3.13872	3.41989	3.35054	2.81784	3.11176	3.32317	3.56907	3.11123	3.56215	3.61398	2.91192	3.89643	3.05011	2.98485	2.4837	3.10749	2.92682	3.19495	3.84423	3.17022	2.6784	3.12918	3.01762	3.19779	4.28153	3.03119	3.33456	3.12162
PIK3R4	5.56826	9.37223	7.65039	9.83404	7.89682	7.95449	8.44223	9.40563	9.14045	10.5347	6.84469	9.23867	8.89244	6.67933	8.54212	10.8263	8.24523	8.30901	9.09148	7.55093	4.58442	7.4254	7.54922	8.08573	6.71906	7.28293	7.52769	8.75587	9.70298	8.18432	9.09225	8.86089	9.13808	8.85448	7.62995	9.82861	6.97314	10.3008	8.21408	9.09902	11.2574	7.80936	10.2103	9.71519	9.16233	12.1256	8.83011	8.03716	8.60665
PINK1	14.0079	14.1498	12.955	14.0057	15.5981	16.7257	12.6557	16.7511	12.9746	17.0626	15.4016	12.2921	18.2413	13.8296	12.5824	9.23259	16.6117	14.8256	19.4065	14.4581	12.9397	10.78	14.4434	12.3523	14.47	13.3596	18.0939	10.9951	11.7202	11.8834	15.7665	16.7553	11.7139	20.1381	12.0154	17.1106	17.3173	12.9516	10.9734	13.1574	15.9111	17.1407	15.8695	16.9556	15.8889	15.7488	13.7883	13.04	17.1986
PPP1R15A	8.06739	19.0781	12.2772	7.23059	21.0859	16.5508	48.2195	12.5076	12.5028	9.64435	8.03719	22.716	61.0967	7.11787	39.071	25.0512	11.1225	17.6992	15.9593	26.4082	8.08435	32.6578	19.2777	20.5855	22.4751	10.8758	16.766	22.1608	12.3474	19.6359	11.1152	29.4047	32.8954	18.3965	17.667	20.0095	23.3962	36.3781	46.0143	20.9306	16.319	15.7738	33.4948	19.7597	36.3197	28.0598	53.0855	31.9044	23.2593
PRKAB1	21.2447	25.2094	8.49989	19.4252	16.2553	17.1909	17.4032	19.7011	17.6551	35.5897	18.6714	31.0834	21.47	17.337	14.5999	21.5557	18.4051	14.4588	20.0756	18.8165	24.5703	14.6095	14.3389	18.1231	28.1484	13.8954	20.5004	15.3746	45.2221	16.2451	21.6458	19.3083	20.9408	34.9209	13.8485	34.2168	19.4868	32.572	13.8694	15.1031	30.0699	18.9137	42.623	17.6499	27.79	16.3319	19.1592	16.0655	19.4299
PRKAR1A	39.1472	85.3775	42.7441	67.3299	59.268	61.3071	69.1488	55.2458	61.94	74.5151	55.8456	75.0635	76.3021	55.3977	60.1324	71.7712	57.7904	61.2383	77.9294	55.224	42.3887	60.7715	59.6784	56.7863	67.7438	56.9675	59.6925	60.6455	72.0987	64.8846	59.5701	59.0069	55.5744	63.7621	58.0636	89.9998	64.2424	78.5096	56.1107	61.6747	74.3722	52.5705	70.3098	58.8478	61.186	86.0933	57.2283	52.1477	56.4016
PRKCD	11.4909	12.8361	10.738	15.6483	11.3138	16.8984	13.8672	17.7884	15.8437	13.1788	17.4506	12.8225	9.74476	8.26755	16.4302	10.4894	14.7928	18.5791	11.5753	16.0512	12.3322	11.315	13.8511	14.2525	11.0263	12.0642	14.0876	12.9817	12.9549	14.2409	15.6971	13.3466	13.5647	17.5775	16.0367	11.7512	18.3508	11.1839	12.9308	17.0566	10.1494	12.5759	12.028	18.4619	13.4507	16.2112	11.9773	16.1184	16.7843
PRKCQ	3.74407	13.1679	5.27392	3.64299	2.75303	4.87422	4.0913	6.99963	10.4769	18.9228	2.57898	8.19324	13.4564	2.37045	2.64947	9.639	8.00936	3.57105	12.3728	3.82162	3.10555	3.90885	2.50045	4.11127	9.77561	4.35406	2.86766	2.52217	13.0255	3.70535	5.60468	7.32397	3.26421	9.61216	2.5837	14.793	6.75021	13.3792	4.47037	4.06562	17.6934	3.12549	20.386	3.15184	15.4997	12.6922	12.7761	7.17694	5.94682
PTEN	7.38619	13.0122	7.46128	9.12147	11.3634	9.31545	11.6174	9.74311	9.26285	10.1793	7.65645	11.5042	6.62589	17.176	11.6802	15.3713	9.4049	8.93832	10.0591	8.7408	9.15051	16.3535	10.1014	11.4574	8.26713	8.96233	9.19083	11.8677	12.2946	11.5718	9.09875	11.7972	11.3016	8.19968	6.99092	9.73588	7.81868	12.5299	12.4015	13.5451	9.94498	8.48356	8.53157	9.09256	8.78731	9.95164	9.04168	8.34834	8.54042
PTK6	0.155545	2.68472	0.314278	0.0671119	0.205208	0.0988475	0.137233	0.120242	0.084072	0.251503	0.069936	0.293614	0.593357	0.0141353	0.194161	0.147514	0.110128	0.0584822	0.375337	0.133827	0.0696194	0.271455	0.144963	0.079997	0.367509	0.0857835	0.0717198	0.102413	1.23521	0.0781679	0.110912	0.432114	0.176029	0.889425	0.400838	1.51415	0.1063	0.448774	0.145935	0.0827246	0.432006	0.109754	0.725683	0.0699213	0.602706	1.04715	0.526537	0.0498412	0.0748614
RAB11A	20.6702	44.1825	27.9479	25.2331	26.4283	24.7042	35.5197	27.3101	30.5521	43.9488	23.0415	38.9772	36.8183	29.8606	28.1852	37.719	25.2283	25.2391	44.5025	25.8751	20.0357	33.0532	27.8161	36.3205	35.9689	25.291	25.3164	30.5574	42.842	28.9567	27.0054	26.7365	31.7749	37.374	25.4387	44.5565	26.372	39.7461	32.6223	25.6382	32.6585	21.1508	36.6324	26.326	30.6413	43.075	28.8111	25.0878	23.8682
RAB1A	73.6757	71.0858	69.4836	74.12	67.5221	69.8036	69.5994	73.692	66.9355	86.713	68.439	68.9131	74.2326	76.8976	64.1856	68.6486	73.7495	70.7313	81.9061	83.4044	81.4312	71.6574	70.8478	67.3768	72.0156	62.4568	74.7655	78.1518	69.3027	70.894	72.9213	54.6869	72.9588	68.9428	65.4483	71.3214	69.9498	87.1203	60.6109	72.1868	61.8247	74.4788	70.6582	77.9031	69.0559	74.8281	56.5017	67.5511	63.3965
RAB24	3.2139	2.69101	3.11678	1.38508	2.83094	2.78372	2.29214	2.46208	1.17981	2.26172	1.86562	1.90655	2.26298	1.8458	2.22464	0.854466	2.89516	2.32173	3.26099	2.92619	2.73227	2.14361	2.40128	2.34478	2.84578	1.64506	2.4685	1.70688	1.87789	2.08673	2.15123	2.92351	3.76821	3.04485	3.06734	3.31783	2.81156	1.58197	1.72563	2.21949	1.87965	2.16152	2.08113	2.19529	2.55547	1.47049	1.55852	0.545325	2.43781
RAB33B	2.77071	5.28676	3.70905	2.60522	2.41621	2.49126	3.61657	2.58003	2.94425	3.02293	2.24818	3.75161	4.01943	3.96849	4.04481	4.20098	2.2286	2.90112	4.41192	3.0703	2.90737	4.82618	3.26207	3.24967	3.56612	2.78107	2.34661	3.31428	2.55756	3.74341	2.43777	3.42383	4.41583	2.64688	2.52356	2.93142	2.4091	3.52961	4.26147	3.0207	2.92423	2.40589	2.9652	2.45073	3.46089	3.901	3.24901	2.75574	2.89991
RAB5A	11.7685	22.1072	11.5712	17.7501	16.574	15.5208	21.5163	16.7336	18.1647	20.4029	15.343	21.8892	18.3361	16.4205	16.3958	22.8966	15.371	14.84	21.237	14.9412	12.7722	19.2403	18.8248	18.1059	19.3252	14.4644	19.2224	17.739	22.6553	18.0687	15.9915	15.3144	18.4066	18.9079	15.5185	20.6127	17.309	22.5985	17.6646	16.3954	20.7559	13.471	20.4509	16.0709	19.8554	25.7409	16.0417	16.3957	14.7678
RAB7A	92.4103	99.2069	97.4749	106.071	124.348	98.8095	113.264	94.3112	100.581	119.196	102.616	107.221	99.4415	102.777	110.473	122.467	108.889	104.681	124.942	122.231	100.394	103.847	97.4461	124.093	111.562	101.553	109.855	119.124	103.991	126.409	95.6335	95.7929	131.608	112.189	95.4921	121.411	106.69	107.704	106.466	110.58	104.013	105.617	112.149	106.02	103.45	112.979	90.78	97.7502	100.207
RAC1	64.6351	86.0314	96.4962	70.9389	81.7076	71.7813	97.3567	78.4236	73.2513	101.437	61.9343	120.428	94.5059	87.7881	82.5396	97.1147	75.6378	74.571	96.4838	78.8803	68.1918	100.986	72.47	109.117	97.1842	82.5327	75.5832	89.731	98.2777	94.8153	77.7781	74.4827	111.287	99.7696	76.0842	87.5642	68.6625	94.3538	120.85	76.5502	83.6374	64.1363	91.0127	85.5686	79.428	96.3836	67.9072	66.6095	64.3932
RAF1	14.8631	17.2463	8.60214	16.3441	12.3393	14.5472	14.3717	15.2084	16.0316	20.1071	15.8883	14.2605	19.2065	11.5834	13.4482	13.472	15.6948	14.2423	20.4532	14.5287	12.5011	12.1113	14.398	12.1306	14.9267	12.1034	14.0172	13.3614	15.5014	13.4298	16.1162	14.4613	14.3082	17.0594	13.3589	15.0588	16.5463	14.4801	14.1734	14.8566	16.4024	14.392	16.757	13.7705	17.5832	20.7612	14.0014	14.3444	14.8037
RB1	8.21562	17.428	21.515	11.2457	11.0643	9.52911	13.5947	10.8838	11.5332	18.6572	8.05162	15.2115	13.565	17.4014	12.0843	17.5552	9.35617	10.6036	18.878	10.1125	9.32886	16.5814	10.6349	12.9198	11.5286	10.2552	10.5565	13.8297	12.9897	13.8318	11.6564	12.7831	13.4714	14.6738	10.7298	14.8292	7.96243	15.214	11.6847	12.3061	16.6056	8.91531	14.0994	10.9403	12.9981	21.434	13.0541	8.79768	9.68829
RB1CC1	7.16592	6.74338	10.8494	10.5088	7.89918	8.53317	9.98841	8.58443	9.93697	7.00922	9.11473	8.78915	6.23693	8.61853	9.51487	10.3329	8.85588	9.31845	7.4527	10.0992	7.65845	9.39874	9.79156	8.64226	7.15078	8.09828	7.51031	10.05	6.66444	10.0931	8.03826	7.30642	11.7807	6.1568	8.01297	5.38832	7.89029	8.04101	8.66512	10.4895	8.51222	7.17652	7.74179	7.83282	7.40306	9.29308	7.93003	8.96916	8.65979
RELA	10.8587	18.2255	14.362	10.0627	11.8795	11.0963	15.5681	13.4385	11.7744	12.8234	8.95993	18.7063	17.9656	11.3405	16.1239	16.4833	11.7201	12.7116	14.4954	12.5257	10.3823	17.4129	12.6326	16.4255	14.3816	11.0608	11.7161	10.4416	16.0829	14.5922	11.8471	15.2352	20.4693	15.6049	12.1738	15.5951	13.0757	13.7014	17.1418	11.6362	13.9602	10.274	16.7741	13.7523	15.8836	15.0163	11.9853	8.67385	11.1108
RGS19	1.43481	2.87377	8.55335	0.975241	3.36634	1.49386	2.99869	1.91444	1.41513	2.75357	0.789571	3.616	1.53122	4.22113	3.86942	3.13977	1.48241	1.80784	2.81102	1.70162	1.8969	6.95577	1.42191	4.9629	2.62079	1.79973	2.26832	2.56717	1.8258	3.91552	1.55311	3.38772	4.08423	4.27747	2.64125	1.45856	0.906228	1.59969	4.56699	2.31407	1.30913	2.14992	1.69729	2.14728	2.04359	2.95812	1.67197	0.736341	1.14719
RHEB	17.1506	18.5953	13.9172	12.3776	15.6704	12.4982	21.3176	15.4633	14.625	20.1742	12.136	21.0201	25.7508	18.4892	16.1171	17.6147	13.3752	15.6989	20.6208	16.723	18.7466	21.3629	14.6315	19.4993	24.0791	13.4134	17.4974	17.0206	20.7082	17.7327	14.8193	13.231	21.3177	19.2035	15.7921	22.9501	14.6043	22.2845	18.3316	14.1653	17.4496	13.2891	20.0448	15.2838	16.4645	16.3839	13.4938	11.1148	12.1244
RPS6KB1	2.68863	4.84652	3.75957	3.63571	3.17658	3.08218	4.17579	3.80005	3.67971	3.78283	3.37415	3.8525	3.66449	3.38694	3.7133	4.66398	3.43984	3.41812	3.83613	3.30007	2.68238	3.98584	3.87835	3.34762	3.0266	2.75225	3.35284	3.52941	3.28067	3.50092	3.38233	3.40322	4.28979	3.38344	4.76646	3.3859	3.09993	3.61449	4.21006	4.20534	3.68202	2.65589	3.43521	2.96296	3.76899	5.04541	3.41668	3.21967	2.94305
RPTOR	2.57484	3.52046	5.36026	3.48868	3.47386	3.80172	3.80171	4.25985	3.76694	3.54479	3.46832	4.64481	4.36598	2.46684	4.12147	3.46989	4.13528	4.21861	3.53041	3.42493	2.26168	3.1781	3.67743	4.24926	2.86887	3.21087	3.36742	2.75644	3.88105	2.91536	4.51616	5.42859	4.45328	3.98982	4.63344	3.49241	4.55992	2.98455	4.39407	3.86366	5.43216	3.128	3.76047	3.94749	4.65949	3.88758	4.65812	3.04277	4.62257
SAR1A	16.3787	19.0492	14.5967	18.8929	17.7597	17.131	20.6266	18.7202	17.9143	17.0286	14.4804	21.485	15.3432	17.4694	20.29	23.0866	17.2766	18.9787	17.4961	18.231	14.1213	19.9474	17.3891	19.5484	21.6548	15.8551	17.5793	17.9347	18.9754	18.9521	18.8024	15.2281	21.2685	16.1481	18.5816	17.526	16.9939	16.6548	20.9645	17.2987	16.2782	13.8715	15.1121	17.6573	16.903	17.8836	15.5397	14.7293	16.0414
SERPINA1	96.5726	100.404	880.764	73.53	35.2091	64.0131	60.1867	71.9983	39.9498	153.196	70.1494	54.5963	121.917	55.1429	42.6117	257.666	44.6968	96.4367	78.7381	72.0815	62.4253	55.6058	48.8068	75.7092	107.573	48.964	45.7722	83.197	131.272	161.74	164.465	104.342	46.1788	90.3942	52.8779	192.315	29.3967	88.306	35.4349	86.7511	118.478	86.4366	67.177	76.7372	43.8717	89.8108	64.3525	51.0332	85.7763
SESN2	17.4944	6.88862	4.88713	20.404	10.3136	17.5305	10.8013	14.7017	11.7793	6.44827	16.2718	9.47222	5.50354	12.3957	12.4471	10.6273	22.058	16.5028	5.00568	19.6819	13.562	8.27085	14.7227	14.1223	5.68062	15.393	17.0308	16.582	9.13644	14.6024	17.9034	6.92966	14.7229	8.9193	12.7698	6.06964	14.2859	10.5999	6.33868	11.7659	5.40461	16.6209	8.58526	22.3503	7.90589	4.58289	10.7393	12.0168	20.4975
SH3GLB1	13.9114	19.569	25.1221	18.13	18.8019	17.9893	23.7839	18.4898	19.7135	18.7113	15.5498	20.9435	15.6447	20.2169	20.5465	26.5829	17.079	18.2614	19.5655	17.0616	14.7257	21.163	19.8627	18.8621	18.258	16.8496	18.5797	19.9506	17.9157	21.3963	16.8004	17.5333	21.8429	16.8015	15.0953	17.4723	16.089	20.6559	23.0115	19.0929	21.1397	13.8478	18.6788	16.4204	16.5669	22.9187	15.4576	16.1696	14.9612
SIRT1	4.38803	7.80272	6.52958	7.29431	6.61459	6.54596	7.01375	6.24594	6.56919	5.58636	6.94286	7.53389	5.73914	7.32264	8.45615	8.34421	5.71633	7.19533	6.83743	6.42829	5.13372	10.8164	7.2247	6.69442	5.28404	6.36037	7.3242	8.37256	6.06355	9.50421	5.51715	5.66886	8.43127	5.87946	5.37474	5.88016	5.55267	7.25018	8.54212	8.04596	6.43074	5.27348	6.84734	7.2444	6.8554	7.684	5.80262	6.41728	6.57077
SIRT2	9.30859	8.62609	13.7886	7.6631	8.18336	7.03609	6.90213	7.28994	7.04588	7.48437	7.33348	6.60012	8.00542	8.05157	7.91937	6.99698	7.95341	7.83144	7.43096	8.52495	8.90442	6.76503	7.60172	7.48523	8.98093	6.88215	7.80448	7.36722	4.91001	8.03154	7.76276	7.56774	8.54871	7.40995	7.53282	8.20922	8.09004	5.32314	8.14129	7.19539	5.74987	8.02791	7.33184	9.01394	7.36392	6.61613	6.42435	7.06799	8.0656
SPHK1	0.216631	0.303082	0.248834	0.182593	1.04078	0.180306	1.18717	0.439592	0.317929	0.259807	0.100523	1.11687	0.616719	1.3395	1.14024	2.26998	0.216613	0.549938	0.528484	0.503957	0.609791	2.39728	0.518253	1.34285	0.758475	0.465134	0.368818	0.661479	0.283269	0.966588	0.333074	0.847309	3.59465	0.522893	1.19452	0.380713	0.288485	0.696244	1.65213	0.725958	0.284782	0.457041	0.645709	0.472838	0.375982	0.0922428	0.191959	0.133045	0.190751
SPNS1	0.446744	0.254664	0.633381	0.312941	0.680448	0.343132	0.572761	0.418482	0.332133	0.390918	0.288482	0.39362	0.52209	0.32407	0.500107	0.269747	0.463974	0.276833	0.365423	0.676034	0.236712	0.478187	0.362121	0.473454	0.37024	0.287505	0.360657	0.287097	0.263906	0.382362	0.274261	0.468494	0.852739	0.720029	0.435049	0.590038	0.451615	0.357713	0.275436	0.392172	0.577307	0.49472	0.45655	0.384004	0.577016	0.449219	0.341004	0.16785	0.359655
SQSTM1	22.5105	28.64	56.6942	22.7391	29.111	23.4849	35.617	27.6229	19.6891	22.2974	21.0924	36.6902	34.4132	32.3854	33.8116	33.9446	27.354	23.4446	29.8145	26.5861	26.9696	31.7978	27.2615	43.0148	26.6126	25.5252	35.8756	28.4035	34.1215	30.3411	24.7509	26.2894	44.9377	36.5508	22.4662	32.5368	30.1779	30.8822	30.2557	22.049	24.5587	29.8377	26.1792	32.7564	24.2955	24.015	25.9871	21.4067	26.3344
ST13	103.005	81.0734	103.636	110.084	74.6995	104.041	94.1306	105.684	88.6806	81.1249	137.769	68.3231	76.1581	98.0143	83.0228	85.084	104.474	93.131	113.552	103.688	108.966	69.9861	100.985	81.3547	94.2319	93.7004	117.619	105.9	74.9283	110.068	87.8996	73.0119	77.9157	73.1228	87.1443	87.553	99.5675	88.7862	77.3092	99.2558	79.4901	92.0058	77.5065	111.829	80.3535	88.1774	78.5837	107.148	108.487
STK11	3.69118	5.09688	4.40464	3.08361	3.96367	4.56563	5.35065	5.03093	4.12742	4.79275	3.67766	5.8919	5.16728	3.48867	5.38573	3.43664	5.34055	4.32006	5.17497	4.33368	3.35456	5.25973	4.84442	5.39696	5.30721	3.8481	4.8485	3.31391	5.01873	4.25702	4.46625	4.88988	6.04486	7.71702	4.76222	5.67439	5.85026	3.67152	4.16749	4.38533	5.1741	3.83236	5.28932	5.1759	6.57472	4.83663	4.45049	2.42848	5.08889
TBK1	4.51168	6.52131	6.72814	6.4216	5.88126	4.68582	5.92919	5.03094	5.32426	5.96781	4.8008	6.16889	3.23519	5.56793	6.14178	6.63735	4.53759	5.39592	5.67682	5.62287	4.48617	6.4733	5.7896	5.67804	4.74666	4.49255	4.65774	6.21565	6.28873	6.21759	5.42869	4.05418	7.04095	4.50499	4.78161	3.84374	4.55669	5.03232	5.67357	6.08705	4.73732	4.64043	4.3113	4.93293	4.52452	7.01173	3.94642	4.86317	4.55283
TM9SF1	2.10799	3.88571	2.65923	1.6952	3.61435	2.22981	2.96524	2.41383	2.04949	4.46211	1.64996	3.29129	3.22575	1.8967	2.64458	2.59626	2.44435	2.09142	4.6888	2.84016	1.55211	3.22013	1.91149	2.9951	2.34257	2.0644	1.95845	2.45086	3.30064	2.37596	2.04622	3.3257	3.55521	5.21979	2.30393	4.11113	2.19712	2.76519	2.18058	2.13729	2.8672	2.83929	3.5597	1.94248	2.98111	3.95866	2.1332	1.21848	2.24043
TMEM74	0.0346369	0.0529986	0.00545634	0.0528806	0.0934226	0.0337508	0.0468572	0.048196	0.0645881	0.0494071	0.0826588	0.0902273	0.108285	0.0217188	0.0738714	0	0.0534352	0.103472	0.228147	0.0489582	0.0178283	0.0648807	0.0689419	0.0693367	0.111541	0.0494273	0.0388931	0.0524522	0.0608718	0.0753598	0.0413128	0.06011	0.102177	0.0488071	0.0991082	0.0746937	0.0943684	0.051077	0.106775	0.0381318	0.0809483	0.0359758	0.0389368	0.057298	0.0357896	0.128715	0.0599276	0.102108	0.0975964
TNFSF10	73.0635	32.5471	55.3743	73.217	48.1716	36.6541	77.6451	73.2715	46.299	47.5734	24.719	60.2931	22.4574	71.073	59.1985	99.1074	67.8782	37.769	26.0637	92.2702	45.7686	89.6185	46.3783	153.49	47.3143	54.3114	45.0453	102.541	65.8883	78.7365	68.1127	21.7557	188.732	43.1178	23.3986	29.5183	29.9586	70.4164	57.6704	50.9971	17.095	53.6659	83.2762	62.4918	30.0369	25.9564	34.8456	44.7314	48.7859
TP53	5.11417	14.8414	10.4134	6.29655	7.21791	6.87307	11.0361	9.34342	7.55366	7.5478	5.08326	14.2345	6.66396	7.68363	11.7462	15.034	7.55125	8.15639	6.79712	8.53491	5.32338	11.2192	8.36519	19.3234	8.60653	8.62671	6.98083	7.62138	19.0466	10.7483	7.51161	9.07501	16.5275	10.2864	8.75522	11.2245	7.03577	17.4065	14.5713	8.68376	13.3879	5.13435	12.1165	8.03431	10.2744	9.75647	8.7498	5.39239	7.33249
TP53INP2	16.7199	24.6795	51.4117	20.658	24.3508	30.1041	31.1265	27.2277	28.5088	20.3904	21.4973	28.6414	65.9211	14.6606	28.9266	26.6789	22.8547	32.2512	11.8906	30.4593	21.5274	22.6484	29.9446	27.7382	32.6795	23.8536	27.9797	20.0843	30.5244	30.5819	22.0924	29.4202	31.6923	16.5172	30.1069	56.7192	38.8052	40.9961	22.5853	23.811	42.575	21.7445	42.2187	28.904	32.6489	26.0626	34.7603	26.1826	22.2191
TP63	0.114971	1.31144	0.0189537	0.159199	0.301085	0.171953	0.235109	0.200489	0.21882	0.0817265	0.165899	0.174124	0.0364017	0.201186	0.361882	0.102919	0.2177	0.176564	0.0847957	0.268327	0.12042	0.37205	0.354108	0.192198	0.137225	0.220449	0.131767	0.234262	0.0268509	0.207241	0.145502	0.130766	0.171666	0.0146517	0.18853	0.0780088	0.224142	0.0621751	0.24521	0.295988	0.0770671	0.123233	0.0273243	0.11979	0.0552545	0.0480238	0.192751	0.068968	0.134532
TP73	0.00884078	0.0350712	0.250684	0.0112478	0.0198711	0.0287154	0.044296	0.0227808	0.00305289	0.00450384	0.00937688	0.0223901	0.0118877	0.0461962	0.0483463	0.022687	0.01768	0.0347507	0.0233649	0.020827	0.0113763	0.0354863	0.0406081	0.0831252	0.0444842	0.0163539	0.0477974	0.0191257	0.00739859	0.0320583	0.0329524	0.0581158	0.0485799	0.0299905	0.138529	0.0261676	0.0154402	0.00668563	0.0227112	0.0216285	0.00918284	0.0191302	0.0195754	0.0365621	0.0133219	0.00730076	0.0148711	0	0.00889667
TSC1	4.38176	3.50256	2.615	6.68816	3.60412	4.73014	4.25436	4.35727	5.92256	3.31302	5.15402	3.90908	3.40089	2.33691	4.61204	3.89864	4.91365	5.25004	3.48551	5.19014	3.24231	2.69592	4.96007	4.15903	3.65472	3.75916	3.62786	3.27359	4.62704	3.74485	4.54214	4.79211	4.53452	3.05869	4.34008	3.66942	5.48082	3.51395	3.54739	5.00443	6.46351	3.68383	4.40189	3.34317	5.85428	4.33919	5.37536	4.90792	5.59732
TSC2	4.96056	5.72499	7.1213	6.17524	5.41614	6.52755	6.14852	6.77721	6.13218	3.80162	4.92256	6.22642	6.53705	3.93867	7.16498	4.97599	6.56624	6.42581	4.15555	5.97811	3.96648	4.70689	5.73609	6.24384	5.47174	4.52938	3.67138	3.72286	4.10223	5.1054	6.0679	7.32284	7.63761	4.53708	6.5252	5.76742	6.73425	3.37963	6.50791	6.05802	6.56161	4.62438	5.74341	5.76491	6.83413	5.42211	6.3292	5.0233	6.87472
TUSC1	6.07031	9.0076	9.25656	4.61158	8.64487	6.50181	7.19736	7.62825	8.39148	10.6331	6.22724	8.04348	9.24638	5.52174	7.49696	5.84469	7.82483	5.69604	12.4395	7.37899	5.07422	10.604	7.14539	6.98168	9.28539	5.71335	7.73114	6.56086	13.7772	7.41587	7.04483	9.18619	8.05607	13.3058	6.95765	12.9057	8.92576	10.1194	6.72919	5.60169	9.43508	5.25834	10.2582	7.73889	12.645	8.74651	7.94001	3.28075	7.54546
ULK1	4.99037	4.38689	6.11987	5.15724	5.11905	6.85375	7.11133	5.76535	6.49686	3.43377	6.69126	6.27237	5.13838	2.78697	6.39492	4.24521	6.04631	6.22763	4.05331	6.02253	4.25412	5.38717	6.84656	6.13786	6.32168	4.63748	6.2491	3.43713	6.75442	5.45908	5.28436	7.31727	8.2732	5.89382	6.4757	4.98621	7.56814	4.88818	5.74976	5.50833	9.31798	4.14084	6.69145	6.08135	7.92754	5.28763	6.69092	2.85089	6.29784
ULK2	2.50467	2.72812	2.38108	3.49624	2.90677	3.19626	3.4057	3.19152	3.4065	2.75826	2.67535	2.7713	3.04764	2.48002	2.89662	3.34882	2.99181	3.10557	2.99217	2.91637	2.14434	3.24012	3.2102	3.23709	2.93827	2.41908	2.34434	2.75305	2.52903	2.8098	3.18335	3.52667	3.22895	3.07348	2.57817	2.23715	3.19749	2.82163	3.94484	3.37833	3.5522	2.69455	3.4639	2.69357	3.42856	3.44868	3.14853	2.94222	3.06251
ULK3	14.6585	7.49278	4.75491	12.0074	6.87995	10.6049	9.0443	10.2799	8.73197	7.31455	8.99564	6.71232	10.4383	8.87396	7.46275	6.04391	10.484	12.1966	7.50535	10.6962	12.947	6.4238	10.9093	7.69023	11.0094	7.47771	11.2907	6.92844	5.47187	8.96439	8.87794	7.19898	11.4837	8.47105	10.4324	8.04971	10.3888	6.83496	5.56983	9.88054	7.93516	12.2644	9.36117	9.78326	10.7769	6.62828	7.43717	8.06264	9.77134
USP10	12.2529	12.7556	16.0191	17.3059	12.3892	13.8268	16.0896	15.5643	14.4035	15.4065	16.169	16.7719	13.9207	13.9648	14.6308	18.398	14.6619	15.4521	13.2575	15.0912	12.3412	12.9159	14.8221	17.7565	13.5064	14.1497	15.9868	13.542	16.9192	15.4807	16.377	12.279	17.826	14.8316	16.1075	13.6132	14.7214	16.125	12.5887	14.729	17.2669	13.7294	15.9999	15.302	14.2635	17.8126	14.2574	14.3231	15.7868
UVRAG	3.63962	4.71023	4.59668	4.58664	4.79626	4.24359	5.06757	4.36587	4.52133	4.38446	3.96848	4.43742	3.5376	4.28896	5.66992	5.8294	4.31339	4.3659	4.15441	4.23534	3.55298	5.07963	4.64062	4.47372	4.52785	3.9625	4.7132	4.64621	3.81065	4.24097	4.5376	4.75704	4.95454	4.87071	4.25803	4.07563	4.39586	4.33499	5.41165	5.31754	5.34069	3.72532	4.44256	4.45507	4.79009	4.47928	3.99453	3.89635	4.2436
VAMP3	41.3477	53.3055	51.4732	38.4699	40.93	41.0639	46.3905	42.1953	37.7101	44.3576	33.6495	37.4014	45.0264	52.7349	41.6171	43.7505	39.374	35.7524	46.7092	40.6942	40.8107	46.7814	38.2816	42.7874	43.4629	37.3882	40.0508	47.2711	39.1637	41.8253	41.8584	40.0898	44.1194	44.3018	36.0477	43.3543	37.872	45.3828	49.2565	42.2082	35.4395	37.8805	39.4989	42.3962	35.6	44.3481	31.6504	32.1881	32.1624
VAMP7	21.2901	26.7754	27.823	27.5696	24.5094	24.6121	30.8279	28.1271	26.0967	36.5468	22.3751	25.8335	24.9185	39.5481	24.2313	31.373	24.8184	24.339	28.1113	24.7641	27.2712	26.0161	27.477	28.3478	25.3958	24.5683	28.5484	31.6255	27.0633	28.1124	27.7367	22.8778	24.9037	23.4059	24.6661	26.4618	24.4474	32.148	23.5549	27.4092	23.1404	24.3426	24.3539	25.8416	24.1829	30.4729	21.6727	22.0387	22.5151
VEGFA	8.61504	5.4391	48.7928	12.284	16.3006	16.3452	19.6733	9.47716	14.1913	4.90948	10.228	9.12139	7.27446	4.88992	20.6554	5.25759	11.1111	18.5614	5.53639	13.9311	8.85198	6.89978	16.9945	7.47957	13.6133	13.5196	13.6381	11.9636	3.68921	10.0257	11.9631	4.98412	15.4394	6.45335	21.922	5.6122	16.8873	6.08777	9.08102	10.0102	6.85114	7.01622	8.81613	14.3598	9.2355	6.46741	9.02719	9.3046	13.3378
WDFY3	8.26241	7.24573	6.47809	13.7516	6.58468	8.11212	8.06429	9.04328	9.06293	8.00218	8.62017	7.05453	7.38812	7.45847	8.32158	10.7956	9.26529	9.04605	8.06208	8.24009	5.79227	6.88955	8.79181	7.715	5.47697	6.70779	7.74102	8.0842	6.53956	7.52617	8.63522	10.8696	11.9061	7.66216	5.11948	7.21282	6.2854	7.82999	6.3239	10.7518	11.9834	8.4768	9.41706	5.81321	8.12903	13.3053	9.79464	9.15834	9.13326
WDR45	11.1929	8.57682	15.2844	9.0875	8.79824	8.18424	9.00059	8.87258	7.82546	10.0127	7.95175	8.25686	10.1797	9.00082	8.02454	6.96382	7.03084	7.99833	11.1051	9.24032	9.76611	7.50575	7.62187	11.152	11.4653	8.99697	8.6003	10.0788	10.0213	9.11341	8.09846	7.96953	9.56072	10.0786	7.55115	10.0308	8.43769	9.04803	7.81352	6.96269	7.86345	10.0961	10.4452	9.30327	7.64781	7.57433	6.83104	7.6665	8.34475
WIPI1	7.41665	6.45405	5.8325	12.6513	8.41804	9.01939	8.56365	8.98948	7.55588	5.7451	10.3363	5.65916	5.83418	9.22643	7.08812	7.38899	10.4487	8.42347	3.96596	10.1313	9.56638	6.52932	7.14881	10.7891	4.71639	6.41392	10.0976	8.5452	5.85379	10.2167	8.96144	5.45308	12.5445	4.85212	6.08847	5.94141	8.42253	8.14054	6.30277	8.23738	6.49422	14.8241	5.84323	8.84721	5.77334	4.83301	5.89149	7.63481	7.20415
WIPI2	9.04257	8.59267	7.88305	9.60244	8.38786	9.40184	9.72605	10.2871	9.6069	10.5411	8.8003	9.21956	9.99583	9.00234	9.30235	7.27253	10.2047	9.20143	10.7781	9.42523	8.04207	8.86093	9.22036	12.1511	9.05746	9.13482	8.98288	9.31404	11.3819	9.77693	9.59747	8.62344	11.0952	11.3752	8.03144	9.22328	9.52212	8.19228	8.50194	8.79754	9.52446	8.69485	8.5774	10.0171	9.38824	11.2492	7.83282	8.35828	9.23602
ZFYVE1	7.63247	6.15285	7.35784	10.0584	7.89462	8.64504	8.27131	8.55409	8.89527	8.48265	11.5543	6.51488	6.27103	7.57608	8.84892	8.46779	9.12985	9.24543	7.72926	9.07872	7.02294	6.2368	9.05205	9.89103	6.08573	7.66488	9.61401	9.16189	9.06714	10.1719	9.57901	7.21482	9.9039	8.57434	7.1702	5.34126	8.31678	6.26967	6.88664	7.81311	7.75417	9.21201	7.15895	10.1825	7.13645	8.72392	7.04572	9.09823	10.0545
[truncated: 206 more columns]
