# Supplementary material for: A Risk Signature with Autophagy-Related Long Noncoding RNAs for Predicting the Prognosis of Clear Cell Renal Cell Carcinoma: Based on the TCGA Database and Bioinformatics
Source: Dis Markers. 2021 May 7;2021:8849977. doi: 10.1155/2021/8849977 (PMC8121606; doi:10.1155/2021/8849977)
Supplement: Supplementary Materials — Table S1: 232 autophagy genes obtained from the Human Autophagy Database. Table S2: 210 autophagy genes expression matrix. Table S3: 813 autophagy-related lncRNAs. Table S4: 17 autophagy genes and 19 lncRNAs used to enrichment analyses. Table S5: results of enrichment via DAVID web serve. [file 8849977.f1.zip › 8849977.f3.xls]

## Sheet: ARGlncRNAexp
ID	TCGA-AK-3440-01A-02R-1277-07	TCGA-A3-3365-01A-01R-0864-07	TCGA-DV-5569-01A-01R-1541-07	TCGA-A3-A8CQ-01A-11R-A37O-07	TCGA-B0-5097-01A-01R-1420-07	TCGA-B0-5119-01A-02R-1420-07	TCGA-BP-4345-01A-01R-1289-07	TCGA-AK-3453-01A-02R-1277-07	TCGA-A3-3306-01A-01R-0864-07	TCGA-B0-4839-01A-01R-1305-07	TCGA-CJ-5678-01A-11R-1541-07	TCGA-CJ-4635-01A-02R-1305-07	TCGA-BP-4975-01A-01R-1334-07	TCGA-B8-A54E-01A-11R-A266-07	TCGA-A3-3376-01A-02R-1420-07	TCGA-BP-4758-01A-01R-1289-07	TCGA-B0-5121-01A-02R-1420-07	TCGA-BP-5180-01A-01R-1426-07	TCGA-DV-5566-01A-01R-1541-07	TCGA-BP-4784-01A-01R-1305-07	TCGA-A3-3331-01A-02R-1325-07	TCGA-CZ-5455-01A-01R-1503-07	TCGA-A3-3383-01A-02R-1325-07	TCGA-CJ-4875-01A-01R-1305-07	TCGA-B0-4811-01A-01R-1503-07	TCGA-B0-4824-01A-01R-1277-07	TCGA-CJ-4871-01A-01R-1305-07	TCGA-B0-5690-01A-11R-1541-07	TCGA-B0-4852-01A-01R-1503-07	TCGA-BP-4995-01A-01R-1334-07	TCGA-BP-4798-01A-01R-1305-07	TCGA-B0-5700-01A-11R-1541-07	TCGA-AK-3456-01A-02R-1325-07	TCGA-CJ-4641-01A-02R-1325-07	TCGA-BP-4335-01A-01R-1289-07	TCGA-B8-4146-01B-11R-1672-07	TCGA-B0-4694-01A-01R-1277-07	TCGA-B0-4836-01A-01R-1305-07	TCGA-BP-4346-01A-01R-1289-07	TCGA-AK-3426-01A-02R-1325-07	TCGA-CJ-5682-01A-11R-1541-07	TCGA-A3-A6NL-01A-11R-A33J-07	TCGA-B2-5633-01B-04R-A277-07	TCGA-CZ-5987-01A-11R-1672-07	TCGA-A3-3382-01A-02R-1325-07	TCGA-CJ-4636-01A-02R-1325-07	TCGA-CW-5583-01A-02R-1541-07	TCGA-B0-4849-01A-01R-1277-07	TCGA-B0-5120-01A-01R-1420-07
ZSCAN16-AS1	2.33144	2.61674	3.26198	3.61514	1.5315	2.40962	16.0239	4.65925	2.84232	4.24126	8.18957	2.11419	2.88755	5.31322	1.72856	4.03158	3.24458	1.79433	4.51144	3.20639	2.236	2.20698	9.00133	6.46726	5.05285	2.92194	2.487	2.83414	3.39665	2.1845	2.56645	4.63762	3.26304	2.30207	3.50013	1.32485	2.89668	2.30945	2.25485	4.68052	4.21953	3.81109	2.02622	2.39271	1.81785	2.27056	2.78274	3.00908	2.63773
ZNF710-AS1	29.5579	4.54866	3.37119	6.34008	2.52587	4.83144	2.72162	8.1559	4.35155	1.94717	2.81727	5.64598	3.42922	22.0446	4.27664	4.20593	4.17713	4.14098	12.5318	2.29628	5.24369	3.90166	3.38591	11.656	2.91875	6.12027	7.77351	6.26952	3.91548	13.6507	4.93876	12.0319	4.55202	7.52528	6.07411	1.80492	4.37744	8.00001	6.36647	3.82087	3.37995	3.38604	11.5785	8.26939	0.991563	9.82318	2.90082	3.84729	7.70219
ZNF582-AS1	1.49005	1.90315	0.50513	0.975084	0.233554	0.882865	0.795752	0.515695	0.38455	0.459552	0.2367	0.936342	0.679666	1.46946	2.39982	1.42698	0.605533	0.183475	0.466533	1.14676	0.398131	0.563288	0.524803	0.504378	0.986286	1.73252	0.441431	0.596625	0.426389	1.0004	0.693688	0.889297	0.775719	0.7782	1.27628	0.363346	0.407551	0.180907	1.0948	0.626475	0.51823	1.69543	0.717184	0.0567756	0.2369	0.867962	1.42168	0.565306	1.66405
ZNF528-AS1	1.72145	2.5441	0.871592	2.47276	0.631113	1.46504	1.94443	2.56463	0.450779	0.351858	0.902029	3.80604	1.21112	2.42123	2.2107	1.32964	1.35984	1.00553	0.830199	1.00553	2.03457	1.19956	1.7387	2.17528	4.5938	3.04963	0.436097	1.0354	1.30922	1.30809	1.03115	1.15396	0.860973	1.38973	3.0904	1.07207	0.297462	1.11714	2.85476	2.84948	1.11019	2.1496	3.44982	0.417014	2.32002	1.06515	1.40253	2.2566	1.85958
ZNF503-AS2	2.28534	0.544222	0.546369	0.911752	0.431562	1.41749	0.873376	0.774597	0.574288	1.15908	1.09576	0.652057	1.18772	1.48791	0.473368	0.665908	0.482757	0.626847	0.893086	1.33594	0.691463	0.35565	0.876383	0.666863	0.37925	0.806079	1.24393	0.875472	0.460861	2.19054	0.602937	0.980687	2.10182	0.473474	0.844782	0.136042	0.734533	0.244596	0.606533	0.601389	0.729139	0.976276	0.641693	0.535426	0.272255	0.475931	0.771702	0.56078	0.631528
ZNF460-AS1	1.26382	1.15566	0.309831	0.566609	0.334261	0.315888	0.344534	0.578257	0.739778	0.138375	0.369273	1.52576	0.338524	0.384871	0.862014	0.630958	0.480279	0.272688	0.408297	0.343515	0.779225	0.337355	1.04788	1.31185	1.87295	1.18769	0.192382	0.339044	0.623066	0.849624	1.00293	0.337508	0.31403	0.606482	1.43232	0.308583	0.31837	0.749	1.05641	1.26806	0.3278	0.891363	4.30842	0.31342	1.28354	0.502804	0.403949	1.05153	0.500234
ZNF436-AS1	0.220307	0.992907	0.406006	1.32298	1.75208	0.978412	1.40062	1.69391	0.965582	0.378225	0.323728	2.35424	0.556748	0.60074	1.65626	1.15329	0.875768	0.860849	0.628575	0.647938	0.838624	0.970349	1.35357	2.20278	2.59097	1.52906	0.612	1.0636	1.02375	0.404857	1.90078	0.503194	0.499931	1.58748	3.16357	0.343102	0.554575	2.35956	2.0487	4.1336	0.811772	1.31627	3.23674	1.13256	2.84753	2.17043	1.30463	1.65945	0.783726
ZNF350-AS1	0.0465869	0.66643	0.417137	0.390225	0.536572	0.0981443	0.312213	0.515948	0.0233175	0.0501576	0.164742	0.406324	0.163609	0.128775	0.734552	0.95641	0.0696357	0.155324	0.318764	52.9904	0.782169	0.276466	0.245773	0.29113	0.757839	0.543802	0.077482	0.122895	0.301128	0.439954	0.297441	0.222434	0.372528	0.274794	0.785788	0.0745692	0.0307737	0.361992	0.587744	0.362141	0.151225	2.30207	4.38963	0.142009	0.245794	0.214417	2.21724	0.516403	0.725291
ZNF32-AS2	0.122276	1.2851	0.469222	1.20134	0.52569	0.404795	1.36967	2.50285	1.23276	0.206875	0.11582	1.11725	0.575117	0.362135	1.47989	0.639261	0.375986	0.825941	0.409789	0.260117	1.41751	0.478439	0.502656	1.74657	0.799186	2.52327	0.296332	0.335725	1.88559	0.457771	1.28256	0.0750621	0.512163	0.844887	3.53561	0.65007	0.571166	1.08584	1.5226	1.37875	0.170107	1.18118	5.08017	0.734805	1.8564	0.723568	0.784305	2.87675	1.20524
ZNF32-AS1	0	1.47387	0.0752651	0.433573	0.365399	0.230209	0.32955	0.832026	0.437553	0.117651	0.289816	0.317694	0.311809	0.151029	0.617188	0.260102	0.555352	0.165605	0.320443	0.333791	0.509632	0.498834	0.419266	1.13814	1.92574	1.06296	0.145395	0.247084	1.17722	0.180594	0.581403	0.208698	0.339815	0.472679	1.77733	0.524733	0.180458	0.377377	0.83553	1.17616	0.202695	0.521032	1.68307	0.466339	0.535359	0.653823	0.261676	0.980564	0.347985
ZNF213-AS1	1.3029	2.42591	1.01704	2.0359	1.12413	1.23008	1.23214	4.91005	1.86942	1.70929	1.89413	2.81286	1.26466	1.32053	1.88739	2.15793	1.48443	1.34268	1.43629	1.31555	2.03446	1.41421	3.3604	4.49924	4.44987	3.17549	1.13644	1.81125	2.32999	2.39249	3.24012	1.13357	0.996832	2.04938	3.94175	0.585092	0.827179	1.47483	3.66384	4.05986	1.35606	2.35942	4.01347	0.94435	2.95152	3.10491	1.41266	3.65259	1.84914
ZKSCAN2-DT	0.619145	0.721828	0.220214	0.906119	0.36768	0.427655	0.561181	2.28684	0.662966	0.218557	0.37014	1.48281	0.314127	0.280563	0.770329	0.779136	0.555279	0.263034	0.171143	0.0988247	0.913596	0.399627	1.04416	1.97898	2.81204	2.05856	0.238023	0.338515	1.135	0.571524	1.7389	0.0799618	0.297597	1.30515	1.7976	0.50567	0.432452	0.578361	2.23509	2.30327	0.127083	1.30008	5.8072	0.389838	1.71556	1.67474	0.314452	2.34661	0.301673
Z98884.2	0.844729	1.18373	1.03896	1.17041	0.538026	0.762678	1.09179	1.83766	0.543601	0.649623	0.213368	1.63724	0.76814	1.38987	1.76074	1.5439	1.1905	0.585224	0.294894	0.829382	1.83848	0.936487	0.520882	1.8099	2.49472	1.70209	0.642253	0.818585	1.97606	1.08265	1.32692	0.633794	1.55468	1.47107	2.18084	1.83501	0.836997	0.62512	1.61472	3.10283	1.23113	1.67386	7.10663	2.05996	1.40981	1.16636	0.686317	2.8664	1.15287
Z83843.1	0.566275	2.63533	0.749036	2.07093	1.20975	0.610039	1.84145	1.12245	0.48956	0.318694	0.34133	1.90823	0.980228	0.569196	2.55018	0.739031	0.819505	0.222347	0.270471	0.628995	1.6686	0.611	0.25924	1.53346	1.59635	2.0719	0.44522	0.664457	2.0908	1.40074	1.51557	0.116752	1.12061	1.2551	3.84538	2.07546	0.875642	0.955577	1.71224	1.37752	0.238723	2.14775	47.0605	0.298153	1.51324	1.87771	1.02473	4.72812	0.796907
Z69706.1	0.404605	1.02765	0.209009	0.649787	0.386552	0.426189	0.813466	2.70059	0.520744	0.528962	1.14973	0.882225	0.0761216	0.239658	1.1222	1.31561	0.622062	0.394183	0.635613	0.595881	1.10523	0.375995	2.20383	1.48095	1.58668	2.1506	0.346077	0.686145	0.728544	0.634556	1.01485	0.703736	0.385165	0.920533	0.626742	0.0346944	0.314994	0.93568	2.05507	1.81453	0.562877	0.450978	0.94262	0.634289	0.94755	1.51636	0.519047	1.32717	0.920325
Z68871.1	0.739497	0.239515	0.432459	0.682781	0.575422	0.55849	0.322602	0.347685	0.54472	0.195288	0.111015	1.46033	0.523697	0.578522	0.935814	0.161904	0.225243	0.380615	0.306867	0.19179	0.950053	0.955401	0.0401504	0.488283	0.127672	0.42753	0.431629	0.615203	0.910898	0.731303	0.831446	0.0599569	0.706623	0.806546	0.655599	0.402002	0.165901	0.415597	0.752125	0.300354	0.329983	1.07049	7.54685	0.433822	1.19888	0.346776	0.952242	0.927975	0.488755
YTHDF3-AS1	0.330261	0.350956	0.318462	0.69887	0.368113	0.811718	0.55333	1.32589	1.09099	0.877082	1.25547	0.768129	0.797395	0.882474	0.528506	0.766449	0.513403	0.440446	1.32358	0.680948	0.575027	0.663352	1.93239	1.45846	0.492472	1.06015	0.72505	0.696975	0.555032	0.187134	0.445149	1.1038	0.557524	0.493506	0.676425	0.0528631	0.938083	0.313648	0.808067	1.26389	1.07205	0.687144	0.299218	0.966451	0.547633	0.334406	0.652459	0.383518	0.467426
WDFY3-AS2	1.07803	3.99671	1.54031	2.66952	1.03398	4.98507	0.630234	1.52414	5.28472	1.14693	2.2474	1.07805	4.65018	1.84569	2.54055	1.606	2.1165	3.05427	3.12014	0.94584	5.38658	3.6123	1.55839	1.82196	1.18931	4.48087	1.78277	2.77753	2.72795	1.40434	1.70579	2.23042	3.0127	2.17069	2.15545	10.5766	1.96965	0.967031	3.73552	0.768051	2.40736	1.81941	3.69898	3.39796	2.02268	2.57582	2.2794	3.07114	3.41131
VPS9D1-AS1	0.432862	0.387008	0.260873	1.00186	0.321649	0.151985	0.634578	1.79773	1.66553	0.45633	0.107627	0.524355	0.19596	0.548402	0.496602	0.547356	0.291159	0.221399	0.251224	0.0309895	0.462632	0.246998	0.298425	1.747	1.65951	1.34213	0.143985	0.193712	0.588732	0.849503	0.854051	0.103337	0.240371	1.22343	1.1571	0.119085	0.205515	0.280288	1.93411	2.3295	0.0752735	1.04368	2.54914	0.329869	1.01955	0.908965	0.186256	1.34234	0.335037
USP46-AS1	1.46319	1.96055	1.21559	2.05488	1.16012	2.24037	1.25859	1.53486	1.92525	0.779548	1.00016	1.4472	1.49986	3.75266	2.06603	0.619355	0.987577	0.781822	1.30491	1.7106	2.74365	2.02447	0.564289	1.13119	0.874173	2.42108	1.14401	0.903854	2.05731	1.88038	1.49279	0.950691	1.90984	2.75825	1.71741	4.79879	1.21066	1.2307	1.52245	1.43416	1.406	1.49078	3.44398	1.40703	2.09766	1.24967	2.20795	1.88705	1.82537
USP30-AS1	0.168688	0.384126	1.7677	0.73305	0.617787	0.939203	0.920552	3.10257	0.506587	1.19348	11.9517	2.48715	0.364972	1.76523	0.493389	2.68874	0.756439	1.07371	1.97867	0.193227	0.854151	3.63023	3.88333	1.32523	1.15154	3.12942	0.889768	0.871826	0.88787	0.836349	6.38516	1.00102	0.545983	4.57704	1.82911	2.25651	4.36963	1.74767	6.85441	8.47295	0.73755	1.53551	2.09599	1.71891	4.63166	2.795	0.714124	1.22113	0.972046
UBR5-AS1	1.11431	1.89309	1.25528	1.99757	1.81067	1.48488	1.57904	2.36969	2.71139	1.12745	2.77731	1.92231	1.51614	2.04108	1.71085	1.28822	1.25222	1.23298	1.35824	2.0761	1.92848	2.00406	1.4101	2.96161	2.32045	2.70331	1.96271	1.64685	3.39742	1.49767	1.70005	1.28843	1.98608	1.57589	1.92886	6.98675	1.52315	1.27791	1.89394	2.38428	1.45682	1.61489	4.21467	1.57149	1.68482	2.06691	1.40452	3.35902	1.90964
U91328.1	1.75693	2.39361	1.09938	2.36922	0.930081	2.22965	0.638744	0.89023	1.47711	0.490411	1.04563	1.60247	1.86012	1.81456	1.83491	1.21972	1.39032	0.650857	2.05409	0.968984	3.15258	1.87925	1.57509	0.966374	1.49828	1.98828	1.16883	0.882803	2.46674	1.37182	0.814622	1.67772	2.16807	1.23275	1.90229	1.3234	0.895074	0.713817	1.91407	0.487518	1.23541	1.58782	2.76742	0.574059	0.921767	0.687068	1.93518	2.17601	1.12548
U62317.2	1.55312	7.09598	5.71161	7.53172	5.7498	2.76556	8.14098	33.0576	3.49812	3.36421	6.20319	6.10108	3.43335	2.4532	3.78554	9.93512	5.50531	4.0854	3.76823	2.66857	16.3837	4.13997	11.1997	10.5838	13.6663	17.293	2.06648	3.42816	10.3378	3.14297	10.6834	4.58171	2.24238	10.2953	15.9051	0.84346	3.60909	3.78326	24.4716	27.8278	4.60426	7.16492	2.01019	5.9855	3.99263	6.89293	2.60674	16.4253	3.37574
U47924.2	0.201749	1.43124	0.461539	1.23884	0.754928	1.04738	1.68043	2.9326	2.05564	0.574061	1.62433	0.90076	0.891983	0.159335	0.712176	1.62072	1.56383	2.01794	1.28888	0.561238	1.39792	1.33212	2.0112	1.26077	2.82771	0.714907	0.805304	0.92865	1.35064	1.00026	1.02741	1.30042	0.17285	0.901016	1.48444	0.691991	0.642544	1.54898	0.809863	2.35243	3.46826	0.824531	0.783369	2.55657	1.2871	0.89539	0.776441	0.958428	1.30023
TTC28-AS1	1.17782	1.90826	0.703546	1.43212	1.07664	1.0544	1.13113	2.50043	2.53434	0.596287	0.70343	1.83958	1.65699	0.294872	1.48151	0.987397	1.07336	0.977969	0.743484	1.03446	1.652	1.05565	1.55167	2.48574	3.44835	1.8465	0.762664	0.938394	2.30285	1.26272	1.48813	0.939826	0.428459	1.38603	3.10831	0.819251	0.47058	1.26984	1.80003	1.5912	1.0612	2.19291	5.52488	1.0076	2.41872	1.21668	1.03274	2.87635	1.54652
TRG-AS1	0.042105	0.511576	0.241231	0.308809	0.405311	0.383032	0.723397	1.12868	0.477044	0.325567	0.949189	1.01824	0.317582	0.396771	0.47832	0.878064	0.600755	0.522078	0.263777	0.166613	0.938989	1.51493	0.36899	1.67919	0.311332	1.51913	0.240641	0.450057	0.744723	0.414798	2.98151	0.18093	0.224459	2.1178	1.00303	0.877668	0.993684	0.753474	3.61742	2.81525	0.527178	0.67694	2.08076	0.350036	1.01265	0.977751	0.360913	0.497028	0.495698
TRAM2-AS1	1.45915	7.19461	3.56031	4.17993	2.85137	5.15382	2.74015	3.28788	6.51702	3.71689	4.57802	4.02554	6.69307	3.1752	5.65054	2.82654	3.163	4.07637	4.1241	4.08252	4.87071	5.08497	4.06483	3.66292	3.06804	5.28187	4.29392	3.44673	6.24094	3.03449	3.03931	3.83325	4.36928	3.92617	3.9274	6.78313	3.24842	1.95399	3.46099	1.87126	4.30173	3.98061	4.69169	1.85107	3.59421	2.87206	5.10183	3.66748	7.15778
TRAF3IP2-AS1	0.29196	1.47217	0.637169	0.624763	0.541152	0.42502	0.966227	0.36785	0.753641	0.437953	0.543768	1.53072	1.00662	0.548601	1.05378	0.521202	0.54134	0.420588	0.620472	1.07093	0.997506	0.505407	0.556948	0.832306	1.19402	0.928586	0.572875	0.730623	0.958428	0.773718	0.736549	0.573259	0.82193	0.87461	1.84373	1.25626	0.393302	0.577772	0.974462	0.506086	0.533951	1.16457	7.05281	0.371987	0.860444	0.865133	0.951501	0.919461	0.988937
TPT1-AS1	0.340425	1.5038	0.653176	1.37684	1.10953	0.776402	1.13359	2.30693	0.944743	0.891749	0.733577	1.69002	1.02675	0.344473	1.21029	1.13541	1.19807	1.19396	0.844523	0.844305	1.25453	0.362141	1.10861	2.00961	2.43823	1.61876	0.620276	1.17008	1.08057	0.649076	1.73847	0.714011	0.915494	1.23887	2.06536	0.414148	0.674619	1.04312	1.68202	0.856042	0.691359	1.50196	6.46458	0.650417	1.42095	1.34088	0.818838	1.8675	1.16796
TNRC6C-AS1	0.068233	1.98591	0.452651	2.01859	0.75653	1.02135	1.24187	2.63244	0.506883	0.533571	0.876251	1.48779	0.532069	0.421888	3.31883	1.32066	0.940464	0.434306	0.563408	1.20941	1.57435	0.779515	1.29175	1.76844	1.33998	3.80945	0.304612	1.51035	1.01208	0.485824	2.3005	0.735587	0.70356	2.35553	1.62899	0.258671	0.782834	0.595298	3.5257	2.66062	0.419664	2.09213	2.30359	0.577997	1.18556	2.30078	0.722373	1.22266	1.0445
TNFRSF14-AS1	1.52495	2.61522	0.678637	3.53631	0.611558	1.43807	0.605938	5.16185	1.55876	0.440965	0.830063	3.78192	1.15512	6.08791	1.55855	1.96126	1.77887	1.09619	1.11418	0.177039	1.81884	1.47104	3.99903	2.84603	10.8529	5.13795	0.311034	1.97159	1.72331	1.237	1.19785	1.49802	2.79106	1.44041	3.1283	0.615381	0.768259	0.657181	5.78762	4.66711	1.45852	1.97297	2.48551	0.7114	1.7998	4.31787	1.58915	2.85127	0.894126
TNFRSF10A-AS1	0.0744513	3.74283	2.89729	2.7899	1.90864	3.65974	1.34717	2.83438	7.6764	0.641261	1.94166	3.13854	2.32051	0.857489	2.13755	1.28479	1.58026	2.27917	3.05653	2.47317	3.37962	4.2653	1.17832	2.82258	1.64005	3.33139	1.93167	3.70355	2.26182	1.56439	1.53167	2.80825	1.09146	3.54249	1.79397	9.56341	0.590159	1.41413	4.04176	0.934894	2.79652	2.61401	7.21751	3.44959	1.71152	1.71331	2.42913	2.04353	2.84506
TMEM44-AS1	1.14431	3.18729	4.08678	9.80932	2.48795	6.08632	2.00243	10.1503	13.0671	2.12942	4.43996	6.59208	4.41874	4.88133	4.6279	4.93048	3.90239	2.14526	5.30272	2.03899	4.77016	3.06651	9.716	7.08041	7.95726	6.2046	2.41071	4.02489	6.35561	1.82111	4.7354	2.56993	1.92046	3.39988	8.32305	1.8486	3.06557	1.26239	5.0715	4.02948	2.00467	7.27489	5.68296	1.16272	2.79512	4.34992	4.44019	7.04689	1.82952
TMEM161B-AS1	2.40386	1.41043	1.36871	1.31881	0.972513	1.14038	0.984501	2.58831	2.62559	1.05441	1.79457	2.39169	0.848904	1.89005	1.41804	1.37322	1.12107	2.66183	1.72835	0.669011	2.2422	1.34851	1.33735	4.53113	2.60694	2.59294	1.14432	1.03072	2.55745	1.85899	1.81521	1.48442	2.1358	1.93677	2.88329	2.21031	1.34443	1.5358	2.88364	2.26152	1.25345	2.60726	9.37954	2.70306	2.8627	2.47337	1.85804	2.55464	1.23237
TMEM147-AS1	1.14521	1.34436	0.386549	1.64802	0.329996	0.352981	0.88305	1.82411	0.747437	0.343275	0.319261	1.7404	0.387763	1.06569	1.1232	0.615647	0.574816	0.3195	0.295756	0.428574	1.17137	0.523524	0.89876	1.51265	2.43122	2.13621	0.27921	0.518628	1.65924	1.13144	1.65138	0.233008	0.789148	1.24738	2.44004	0.124983	0.535129	0.745763	1.96646	2.10689	0.393772	1.14229	2.6175	0.541486	2.02673	1.40606	0.563864	2.9366	0.545654
THUMPD3-AS1	2.51928	2.52373	0.702754	1.29612	1.20183	0.554618	1.10418	1.83623	1.56987	0.515351	0.698222	1.78346	0.724941	0.964482	1.414	0.665612	0.598745	0.499387	0.480196	0.709898	1.71304	0.662419	1.03667	2.76455	2.16178	2.06953	0.487716	0.80604	1.94107	1.39001	1.45299	0.324771	0.674864	1.9318	1.51154	0.946624	0.716416	0.851533	2.1266	1.97944	0.543238	1.46766	6.75159	0.465372	1.72889	1.34966	0.651542	2.17819	0.861092
THCAT158	0.221718	1.3593	1.74091	0.469181	1.26036	0.350319	1.76079	1.15102	2.0974	0.692263	0.970254	1.32142	0.423393	0	1.25226	1.34574	2.02824	1.06852	1.36537	1.7778	0.310211	0.303638	1.72264	0.637356	1.75828	0.614669	0.37613	1.00266	1.11785	0.628154	1.01451	0.698685	0.561433	1.67399	1.64282	0.931592	0.549222	4.76643	0.381438	1.11366	1.23379	1.06678	5.96607	1.78425	0.877344	0.397979	0.238922	1.54483	1.71807
TBX2-AS1	1.23217	3.35918	0.731307	3.2766	0.701307	1.1046	3.01757	2.31369	0.0787304	1.1008	0.730067	1.4291	1.05305	0.452919	3.16501	3.36968	3.46804	0.309899	1.44146	2.41743	1.96849	0.744983	4.22464	7.84751	6.42367	2.06564	0.797923	3.74936	1.57595	1.31837	1.21352	2.42209	0.768669	1.28349	5.30635	0.0629448	1.11699	1.20527	1.60864	1.4579	0.875319	4.85801	4.13289	1.05487	1.02257	1.44793	1.8716	3.09283	2.00365
TAPT1-AS1	1.17291	1.05933	0.336936	1.25614	0.369881	0.560484	0.408363	1.55641	0.936431	0.437361	0.341423	0.864967	0.580196	0.229322	0.824034	0.408556	0.456687	0.489037	0.427837	0.432551	0.752476	0.564153	0.444531	0.822358	0.756217	1.24389	0.365408	0.355767	0.695273	1.19952	1.30898	0.631041	0.899778	0.539973	0.69277	0.398377	0.345817	0.577947	1.25336	0.6774	0.565132	0.468728	5.08522	0.345323	1.02851	0.742597	0.662785	0.896956	0.649845
STARD4-AS1	0.0951813	2.01147	1.33043	1.82902	1.4603	0.837456	3.00554	0.970807	0.7188	0.210981	0.159629	4.16299	0.855333	0.541675	2.60689	0.56472	0.873717	1.03348	0.394042	0.567584	2.80702	0.797427	0.124863	1.32957	1.57395	1.90347	0.877184	1.23433	2.59664	0.951741	1.20944	0.208513	0.794687	0.994058	2.59028	1.99289	0.593599	2.51603	1.60537	0.99935	0.556917	3.15983	13.0265	0.911371	6.29835	1.78966	2.36557	2.27857	1.7681
STAG3L5P-PVRIG2P-PILRB	0.380928	0.583843	0.239555	1.17737	0.295365	0.444862	0.541098	3.57677	0.758497	0.236267	0.488669	2.02834	0.332628	0.480697	0.836038	0.801986	0.594147	0.406614	0.20034	0.0948568	1.32469	0.731475	1.1319	5.11287	7.03435	1.89098	0.194196	0.692803	1.86006	0.348985	0.713765	0.0948925	0.342129	1.6803	2.35705	0.546769	0.328209	0.557663	1.96126	2.10943	0.581779	1.48605	2.01447	0.454369	1.07199	1.97809	0.256553	1.5277	0.544995
ST3GAL6-AS1	4.83819	1.12669	0.116246	0.496035	0.313529	0.0592591	0.226216	0.0389409	0	0.262469	0.248676	0.163558	0.382798	1.78834	1.20478	0.133908	1.29501	0.187568	1.31978	0.472574	0.332339	0.179769	0.296794	0.0937511	0.438514	0.328346	0.261987	1.03885	0.278791	2.15171	0.478916	0.402913	0.3249	0.221226	0.305007	0.270147	1.00337	0.437139	0.129046	0.201839	0.104353	0.682797	0.509701	0.0685955	0.190812	0.207142	0.0673591	0.178173	0.258775
SRP14-AS1	1.92851	1.69736	0.813351	1.37662	0.806814	1.41362	0.525826	3.49996	2.95129	1.01256	0.959887	1.40552	3.15559	1.94975	1.04446	1.83456	2.10867	1.21549	1.71981	0.786785	1.90231	1.30244	2.69871	3.26879	2.01444	2.17403	0.732878	1.54114	2.31551	1.56426	1.38871	1.17305	0.591496	0.592141	2.49215	0.894344	1.18316	0.595295	1.72099	1.2132	1.20547	1.17489	2.78601	0.724757	0.842266	1.73629	1.17192	2.42635	1.88445
SPINT1-AS1	17.2758	2.25281	2.54413	3.69558	1.18038	3.87064	0.641309	6.91518	9.17686	1.48359	7.15698	1.31684	2.20123	0.987518	1.63944	2.9041	2.65477	2.62199	4.52724	8.85678	2.24929	3.04909	7.58173	5.03918	3.3079	3.68614	3.7815	1.61559	3.38136	6.75063	0.746737	5.15378	2.6697	5.32838	2.74391	1.21005	3.33757	2.61072	3.16085	4.55475	4.02928	2.48875	1.73397	4.13043	1.28384	3.45296	2.74982	3.63679	2.32951
SPAG5-AS1	0.0783211	0.363916	0.187388	1.53197	0.454867	0.494995	0.43096	1.17271	0.303292	0.155334	0.235052	0.347544	0.537446	0.421594	0.57623	0.61446	0.229211	0.112448	0.278024	0.0661054	1.33035	0.835491	0.166067	0.60794	1.03937	1.78636	0.135746	0.470695	0.87395	0.294884	0.574622	0.743966	0.357094	0.695399	0.98334	0.257327	0.175631	0.309626	1.22922	0.488046	0.389956	0.326983	1.61339	0.173403	0.400797	0.603319	0.288731	0.783309	0.214406
SOS1-IT1	1.24804	1.32934	0.963801	2.10079	0.871181	1.02248	1.38133	1.62304	0.832885	0.705779	1.00303	1.57597	0.921426	1.2719	2.48315	1.1815	0.994935	0.710704	0.813288	0.837539	1.9049	0.949534	0.743662	0.850825	0.64085	1.54511	0.805121	1.26846	1.6949	1.16076	1.39512	0.45143	1.88172	1.51693	1.57198	3.07217	0.911848	1.02853	1.47477	0.474902	0.806739	1.24588	11.1017	0.806981	1.61054	1.3577	0.883	1.83657	0.936716
SNHG9	1.8075	2.07556	1.80814	2.88384	1.91873	0.785748	2.56689	17.0392	4.22187	1.42092	3.65242	1.12605	0.680121	2.89467	0.972267	4.63521	4.03978	2.08705	2.94466	2.2019	0.829592	0.982277	8.29725	11.5464	4.17127	2.30244	2.20454	3.89237	1.4836	0.894121	2.96139	2.91779	0.955922	2.06463	4.25165	0.206655	1.19397	2.15502	2.96151	6.58781	4.3905	2.83546	1.09174	6.34931	0.940672	4.79336	1.93229	3.81632	3.44139
SNHG3	0.676734	3.25272	1.60608	1.66731	6.0085	0.741348	2.45683	3.99098	5.3072	0.466305	1.56917	2.90621	1.95308	1.42702	2.43801	1.46007	1.4809	1.26235	0.92987	1.44405	1.59068	1.80853	3.10465	4.1662	4.1518	2.80993	0.7988	1.01429	3.84186	0.78334	5.76094	1.62295	1.49974	4.05559	4.10225	0.988816	0.992398	1.83793	5.61937	8.53251	1.40411	2.77078	10.8996	2.51079	4.45507	3.95652	1.1911	6.80943	1.83486
SNHG25	0.454921	0	0.646251	0.902497	0.316913	0.718783	0.743134	2.59784	0.341543	0.306117	0.67867	0.991936	0.411892	0.707336	0.12044	0.812116	0.611992	0.465363	0.416883	0.977059	0.265204	0.428315	3.27269	2.48752	1.85007	1.65944	0.226983	0.321447	0.882154	0.201382	0.968169	0.977427	0.227358	0.805007	1.95256	0.0682656	0.394412	0.294571	1.89136	2.85625	2.13595	2.29233	3.70945	0.416014	1.41439	0.549616	0.765967	1.44076	0.784704
SNHG22	0.152415	0.261637	0.296039	0.709561	0.2922	0.577965	1.23799	0.417778	0.265476	0.498855	1.10759	1.737	0.341233	0.0842608	0.361553	0.919659	0.53037	0.388052	0.268169	0.0977687	0.426494	0.183682	0.421045	2.09543	1.1653	1.30765	0.316358	0.372199	1.2965	0.652033	1.3948	0.62875	0.390007	0.532221	1.06872	0.117102	0.38057	0.592152	1.98581	0.514017	0.602183	0.293333	23.6132	0.579821	0.68927	0.235701	0.306584	0.791641	0.194145
SNHG20	1.12049	2.3872	1.84906	3.13148	1.88749	2.67561	2.53308	3.40064	2.23821	1.86686	2.40695	3.9872	2.17674	1.4365	2.16916	1.9867	1.95525	1.28624	2.23015	2.2127	3.10229	2.57946	4.0705	3.21274	3.98978	5.23763	1.08778	1.76546	2.78561	1.51182	2.83783	2.49822	0.682463	2.18313	3.381	0.931242	1.91904	1.07682	3.00051	2.91042	2.29234	5.0173	8.62663	1.35385	3.13547	1.95314	2.22637	4.96972	1.66837
SNHG19	4.99216	7.65141	13.5627	27.0213	13.8078	9.34839	8.08522	37.4345	51.7777	23.0419	17.2243	10.9524	18.2929	3.38593	6.88576	16.9986	13.9705	10.886	13.2159	19.8555	6.81217	9.36874	68.3021	31.9479	24.6257	14.0286	11.3933	8.51815	22.2293	5.79485	10.1325	28.2053	8.50133	8.61577	17.1247	1.60923	8.47311	5.74672	9.86072	17.7448	27.587	23.7428	4.39729	11.2439	17.5069	12.1265	22.041	23.5693	11.7268
SNHG17	2.06953	2.76445	1.8221	4.29046	3.88523	1.99694	3.53443	4.68176	2.34197	1.47595	4.24676	3.93062	1.55423	5.19862	3.84736	1.61802	2.18459	1.88868	2.58033	2.21053	2.12409	1.31882	6.43342	3.57306	5.31399	3.79111	1.52628	2.40377	4.49156	1.92588	2.59201	2.32604	1.29854	2.36569	4.45665	0.498701	1.20865	2.55297	3.69464	5.79905	2.09626	3.27558	3.65421	2.2517	3.4883	2.10663	1.92964	5.73504	2.44533
SNHG14	0.714069	1.7792	1.19905	1.4915	1.25842	1.31446	0.947684	2.09765	0.937209	0.539834	0.672355	1.23215	1.58907	0.949871	1.57465	0.94101	1.10289	1.1292	1.04825	1.24623	1.50989	1.69978	0.513699	1.52941	2.19117	1.55024	1.09172	0.971493	1.99432	2.08182	1.35595	0.849457	1.06573	1.4956	2.21378	2.41446	0.591467	1.28077	1.25573	0.718789	1.50212	1.45804	7.14191	1.28465	0.243366	1.54935	1.57318	2.38402	2.01745
SNHG11	2.96163	2.37041	1.24831	2.75006	1.42817	1.95939	1.74565	2.53235	3.08002	1.50053	2.87659	4.10092	1.84287	5.32046	2.19011	1.55502	1.43139	2.66744	2.4802	1.26815	2.1544	1.77012	3.71136	4.72001	3.30821	3.39475	1.67119	1.79169	2.16498	1.79516	2.66113	1.85947	1.87991	2.68503	2.6812	0.607183	2.15496	3.06399	3.75124	3.05461	2.61125	3.36162	1.97044	2.69293	2.58593	2.71584	1.73096	2.24258	2.07595
SNHG10	2.75531	1.65433	0.671775	1.83817	0.443906	0.599294	0.931438	1.46836	0.878705	0.393782	0.582016	2.13849	0.551255	0.516733	1.26814	0.769005	0.685201	0.310402	0.9772	0.986872	1.00071	0.361751	1.55533	2.71229	4.17307	2.51416	0.381204	0.836191	1.58134	1.28951	1.21948	0.512249	0.584936	1.19854	2.1592	0.419562	0.281868	0.547342	1.54743	2.50779	0.497514	1.5431	2.01032	0.356767	0.928097	1.57114	0.686075	3.29486	0.862755
SLC25A25-AS1	3.4333	1.50434	0.411444	1.53758	0.592767	0.461175	1.3701	3.73935	0.560839	0.226367	0.423138	1.25488	0.478866	0.817066	1.31324	0.607165	1.03378	0.238414	0.533136	0.272005	1.44662	0.47086	0.729583	1.6447	1.6573	2.281	0.197469	0.436254	1.31106	2.03228	1.56349	0.251558	0.626353	2.04556	2.68659	0.198954	0.409303	0.544571	3.5462	1.97901	0.26841	0.894205	1.67407	0.452402	2.11699	2.01507	0.775212	4.43399	0.506752
SH3BP5-AS1	0.419133	2.49184	0.948671	2.31945	1.76111	0.656429	2.55575	3.76199	1.74313	0.629386	0.296186	2.70964	1.11123	1.17762	3.13624	1.24295	1.07329	0.403681	0.654971	0.64751	2.01903	0.708051	0.777613	2.68128	5.90979	4.90857	0.382482	0.975767	2.22261	1.1855	2.96651	0.292279	0.999588	2.21853	5.06797	1.14205	0.647535	1.24629	3.26377	4.4123	0.375938	2.55305	7.39738	0.44885	2.19785	1.51914	0.985518	3.09586	2.40308
SEMA6A-AS1	0.162052	0.356291	0.531139	0.628197	0.44845	0.417914	0.741497	0.93991	0.704817	0.132359	0.155613	0.601099	0.213418	0.193079	1.21116	0.269342	0.716659	0.360761	0.172058	0.128018	2.55398	0.405591	0.18492	1.37587	1.14763	1.54917	0.262086	0.265338	1.9902	0.269136	1.23087	0.0320166	0.230868	0.995422	1.55519	0.979415	0.315601	0.615121	1.79451	0.350847	0.404243	0.726655	6.86512	0.255505	0.549639	1.55856	0.742664	1.74321	0.610958
SEMA3B-AS1	11.9733	0.688175	0.0966422	0.185573	0.41705	0	0.188067	0.582732	0.421371	0.402843	0.124044	0.475914	0.184786	0.904981	0.198121	0.125241	0.167785	0.25517	0.34288	1.76796	0.261752	0.0320257	0.0672935	0.467646	0.808381	0.0682434	0.280036	0.317262	0.272085	4.47211	0.447921	0.267973	0.498663	0.331053	0.92976	0	0.139028	0.787411	0.26821	1.67801	0.130133	0.121639	1.14411	0.0855414	0.26439	0.452051	0.167999	0.0740628	0.198587
SDCBP2-AS1	1.00897	0.869348	0.756657	1.00984	0.712109	0.631932	1.01036	0.81704	0.754584	0.234876	0.33062	1.26282	1.02352	1.01222	1.2954	0.667624	0.709241	0.577391	0.702558	0.47747	1.31175	0.885608	0.431587	0.749812	0.621829	1.31872	0.342097	0.629808	1.36479	1.37408	0.949291	0.496622	0.565912	0.859395	1.29539	0.678114	0.575137	0.474232	1.22869	0.698828	0.287234	0.724411	9.19074	0.541495	0.717905	0.919794	0.608697	1.55455	0.818767
SCARNA9	2.01525	1.26295	0.971623	2.36916	0.698824	0.566067	2.07086	1.58091	0.874176	4.43584	0.831408	9.63461	1.17956	1.29979	1.77055	2.51831	2.61065	2.15822	0.919269	0.512979	2.08858	0.735956	0.128868	3.80608	8.33221	2.09099	0.759719	1.16449	8.53936	4.85302	5.28962	1.9244	2.14863	2.69438	5.17965	0.913947	2.39616	3.18979	4.77672	7.79255	1.86904	0.465883	256.346	2.78482	0.607573	4.01925	0.402151	3.47487	1.04582
SCAMP1-AS1	8.2483	4.781	2.05068	3.60521	1.7404	4.20012	2.32344	2.38144	6.75557	2.23199	4.76121	5.68085	2.34681	5.87675	3.70574	2.50399	2.03331	3.81824	3.32418	3.04161	3.72748	3.15317	4.95012	5.6231	3.3006	5.83093	2.67617	2.53326	3.86607	3.75519	2.91943	4.32151	2.3514	4.24605	3.12473	2.68994	2.73592	4.02142	4.70475	2.94345	2.87177	4.79512	3.90834	2.92034	3.82988	4.31193	3.60443	4.00923	2.85607
SBF2-AS1	5.33045	3.57746	1.97124	1.85579	1.40892	2.71319	0.483502	1.71689	5.58664	0.971478	2.40892	3.19534	2.23007	0.59333	1.35546	1.31987	1.82882	3.64334	1.5911	2.38589	2.25055	2.02231	3.35144	2.29525	1.73375	2.41857	2.06265	1.28078	3.68701	13.0268	0.735986	1.77073	1.03303	1.43961	2.44959	5.12502	1.54787	1.83261	1.62299	1.49743	2.18431	1.72644	6.05028	2.52998	1.99535	1.73984	2.91986	1.95759	2.78903
RUSC1-AS1	0.481089	1.41132	0.413423	2.5332	0.751721	0.686722	1.23391	2.913	1.87008	0.363057	0.620077	2.33328	0.820098	0.894833	1.67285	1.29627	0.870993	0.633691	0.494426	0.319313	2.38626	0.794303	1.45554	3.13004	3.88099	4.25112	0.305098	0.665896	2.34532	0.837534	1.82764	0.463694	0.497351	1.91479	3.40455	0.766455	0.588061	1.12961	4.27492	2.14543	0.469121	1.85926	5.82925	0.871666	2.47047	2.15421	0.682341	3.58838	0.902028
RPARP-AS1	1.21217	2.31507	1.25812	2.0797	0.504328	1.39452	0.631735	1.62976	2.9357	1.08255	1.78152	2.35483	1.77662	0.783624	1.4513	1.42601	0.934334	0.347935	1.04018	1.18055	0.966523	1.5319	2.82105	1.64767	1.60441	2.67341	1.43818	0.647323	2.55999	1.37883	2.03884	2.08034	1.90212	1.63099	1.72625	1.52896	1.10145	0.918739	2.6684	2.7156	1.22396	1.43464	3.40098	1.70106	2.54829	1.75855	1.49734	3.75941	1.11475
RFX3-AS1	0.131569	0.521198	0.40779	1.61962	0.327138	0.501047	0.396782	2.7321	0.501491	0.207031	0.254996	0.662032	0.593122	1.21693	0.550181	0.361345	0.871364	0.239269	0.474852	0.324602	1.33105	1.57311	0.160177	1.47996	0.730569	1.29951	0.18179	0.194514	1.22986	0.150534	1.4108	0.231946	0.499062	1.58794	2.08506	1.10562	0.451262	0.249027	1.52059	0.472036	0.323832	1.0397	5.50164	0.148082	0.537785	1.15986	0.499856	1.81098	1.2247
RERG-AS1	9.42881	0.632699	0.484645	1.92327	0.104572	0.345883	0.235781	0.584461	0.0704369	0.0505048	0.684264	0.272758	0.67956	10.3733	0.165591	0.209355	1.05177	0.127963	1.65071	0	1.22513	0.674536	1.34986	0.293146	1.86002	1.43736	0.234055	0.901577	1.60703	3.38895	0.499167	0.671921	0.87525	0.110678	0.593421	2.75939	0.0464801	0.303749	0.484211	0.168299	0.195778	0.122	30.7277	0.343181	0.424279	0.453393	0.463368	0.519978	0
RAD51-AS1	2.18113	6.29738	1.14597	3.11892	1.12205	1.54147	2.17386	5.40023	3.17709	0.541915	0.803431	5.90756	2.24028	1.55879	3.96156	2.7206	1.8809	1.31371	0.929335	1.25988	4.86874	1.53818	2.41399	8.05	8.09312	6.09298	0.511582	1.39102	4.38013	3.05008	5.13783	0.480645	1.50312	3.77165	7.4623	2.38342	1.136	1.7141	7.87886	6.00276	0.829902	4.89685	11.0966	0.937626	1.84418	4.45304	2.53618	6.02215	2.35482
RAB11B-AS1	5.9487	2.4984	1.41285	2.17037	1.18892	1.38285	3.12059	4.77074	1.95072	2.66492	2.06732	2.02763	1.4858	1.81444	1.91163	2.46568	2.1463	1.93982	2.76701	2.96059	1.92608	1.74169	4.68283	4.23875	3.1283	2.15498	2.04697	2.0408	1.85626	2.02434	2.02271	2.33097	1.27578	1.96818	2.1748	0.344753	1.4634	1.93038	1.63116	5.07803	2.0166	2.82749	2.41601	1.65074	1.7007	1.83156	1.79291	2.31709	2.59838
PWAR6	1.44803	2.16586	1.66933	1.8789	2.01463	2.34741	1.25949	2.48088	0.781303	0.538099	1.03954	1.30873	2.89883	1.07872	2.06154	1.19472	1.43682	1.09879	1.49572	2.39978	1.92858	2.18228	0.743725	2.35744	2.5755	2.21772	0.905254	0.9211	2.21935	2.75435	1.12923	1.21603	2.14882	2.0192	3.32831	4.14652	0.495218	1.4408	1.74714	1.30186	0.966751	2.32369	15.0917	1.2021	0.286398	1.92374	2.44694	3.57231	3.55016
PTOV1-AS2	1.79256	3.03165	0.734405	4.23062	1.22292	1.07431	2.95153	6.64246	2.36676	0.632224	0.225412	4.73974	1.2109	1.19603	3.52389	1.97244	1.53836	0.927391	0.815673	0.442526	4.09352	1.10046	2.60136	5.48512	7.63562	6.49373	0.370096	1.08318	3.35615	1.58704	3.5354	0.796847	1.15331	5.32317	8.15459	0.259716	1.02588	1.621	8.84396	8.70435	1.18239	4.03907	4.8302	1.58272	3.37189	4.31005	0.901989	6.9496	1.85357
PTOV1-AS1	1.2224	2.66565	1.84581	2.46238	1.70208	1.77096	1.95101	4.7956	2.46239	1.45378	1.77563	2.44943	1.62968	2.27689	2.38989	2.98459	1.8047	2.00074	2.15077	1.68889	2.52597	2.34625	3.03053	3.39878	3.96937	3.23795	1.32869	1.60737	3.03656	1.42258	2.67758	1.68629	1.90484	2.6046	3.28989	1.29138	1.487	1.72919	3.30439	3.4883	2.43837	2.23521	3.51675	2.2082	1.85404	2.90308	2.0333	3.91312	2.31567
PSPC1-AS2	0.168176	0.876385	0.390938	0.889696	0.234313	0.575728	0.887565	2.00805	0.378786	0.633728	0.557536	0.91675	0.276852	1.04595	0.771758	0.938199	0.301656	0.229381	0.246582	0.67424	0.823543	0.230313	0.96788	1.47134	2.39378	1.47232	0.251734	0.61793	1.30446	0.357346	1.029	0.120445	1.1767	0.64479	3.2672	1.71608	0.374931	0.653383	1.49484	1.28216	0.350942	0.874769	9.14208	0.230689	1.14081	1.27715	0.377551	2.13049	0.535551
PSMB8-AS1	4.35929	17.7641	7.61794	9.74128	5.92463	8.83374	7.46117	26.0464	6.94719	6.63009	17.1597	10.4593	4.7753	3.41563	8.98128	13.3583	9.22903	6.52049	8.9816	5.04913	8.39676	9.68175	16.4264	14.4514	16.0231	19.1529	4.94041	8.52857	9.815	6.13502	19.8828	8.26363	2.17056	14.692	14.6579	14.3185	6.54331	4.39675	22.1271	20.6547	9.61533	10.2943	6.89334	5.95747	6.69656	14.287	5.58814	12.9465	7.45708
PSMA3-AS1	4.17136	8.92131	3.57116	6.52436	2.90145	3.03414	4.95903	6.30935	3.56267	1.35766	2.54367	7.54312	3.22587	2.36506	6.47294	4.11374	3.5899	1.6045	3.3756	2.71537	7.55676	2.59185	5.73158	6.4189	13.6667	9.95937	1.93333	3.66664	7.51649	3.96098	5.59445	2.11187	3.36971	5.52507	11.2672	7.40006	2.18181	2.81572	9.58063	5.27056	2.00066	6.82553	17.9028	1.72877	3.74148	4.76973	3.78801	13.3495	4.62718
PRR34-AS1	6.10356	1.06406	2.55523	2.27634	1.04787	2.31571	1.54118	3.84436	7.66628	2.63166	6.7896	2.41783	4.77147	0.89954	1.84822	5.28015	2.41269	3.41938	1.88738	2.35257	1.55143	2.26794	4.2244	3.66961	2.60278	3.69314	3.20414	1.01381	2.57093	3.38056	1.86226	6.62945	1.27221	3.46369	3.0843	1.02442	3.36779	3.87726	3.50013	3.91777	3.82301	2.67073	7.50855	4.6028	2.74714	1.83727	2.59761	4.62645	3.65396
PRKCZ-AS1	0.401138	0.927819	0.659329	1.43485	0.406467	0.729837	0.925638	1.72277	0.561261	0.402437	0.157165	1.27224	0.87047	0.51661	1.34522	0.740517	0.776755	0.563708	0.735195	0.657909	1.18201	0.387042	0.616507	1.40152	1.72404	1.52977	0.27293	0.77303	0.848578	1.00087	1.10594	0.522347	0.899118	0.699081	2.07595	0.0766118	0.4065	0.661171	2.17488	1.27564	0.456589	1.03141	2.70097	0.983775	0.669971	0.780457	0.638571	1.96339	0.880642
PRKCQ-AS1	0.735185	1.97721	0.377679	0.682245	0.484424	0.765846	0.951375	1.29048	2.91531	0.12682	1.72361	1.30487	0.802386	0.134731	0.513305	0.851997	0.462637	1.49581	0.440705	1.88898	0.776669	0.956756	1.09869	1.00009	0.813537	0.586732	0.972785	0.404105	1.1237	0.615653	0.799604	0.843613	0.481783	0.886466	0.425746	1.01423	1.42471	2.73004	1.35563	2.05475	0.904107	0.59157	1.94304	0.438301	1.83228	0.297241	0.47417	0.463102	2.28513
PPP1R26-AS1	0.244505	0.775343	0.326651	1.27677	0.394696	0.763763	0.521246	1.81206	1.45588	0.381251	1.28016	1.3359	0.735614	0.221401	0.750006	0.492927	0.737247	0.218493	0.964234	0.270415	1.47453	1.18927	0.873415	0.774515	1.01578	0.990312	0.349161	0.514726	1.27797	0.352327	0.807453	0.50722	0.516881	1.44719	1.31037	0.845147	0.618198	0.769773	1.88079	0.733538	0.287367	0.66879	1.76454	0.316115	1.52514	1.18742	2.06314	5.39383	0.75177
POLR2J4	2.52322	1.40014	0.522486	1.51087	0.640321	0.989504	1.23643	1.74508	1.41861	1.1507	2.0195	1.84315	1.11639	0.806557	1.38558	1.81406	0.928856	0.76441	1.26037	1.10567	1.3983	1.09737	2.24422	2.13843	2.38174	1.53562	0.987672	1.23322	1.92665	1.17741	1.21812	0.86478	1.23531	1.27656	1.75874	0.221142	0.910891	0.698758	1.76909	1.27774	1.44561	1.23246	2.58588	0.866063	0.8031	1.2668	0.757417	1.52209	0.944127
PLBD1-AS1	5.25182	1.8538	1.09614	2.10482	0.827801	2.03957	0.639932	0.440634	1.27448	0.31413	0.492428	2.23629	1.30994	2.71277	1.16102	0.30778	0.237883	1.47122	0.700028	0.455742	2.94412	0.889949	0.419794	0.596719	0.323608	1.39326	0.449968	0.509784	1.93736	6.36867	1.43946	0.227957	3.81779	0.469362	0.52728	0.796051	1.4192	1.47706	0.973477	0.761301	0.6273	1.06924	3.96515	2.03749	1.79927	1.09871	1.57203	0.462023	2.0835
PITPNA-AS1	0.816675	3.07562	2.68191	4.5519	2.43824	4.48554	4.07553	5.45101	14.2336	3.04604	4.95076	6.31734	4.11007	4.35364	3.02701	6.50854	2.95589	6.31207	3.42121	4.7108	3.67273	2.71616	4.61618	6.70753	3.70676	4.21321	2.73594	1.74767	3.01647	2.12781	2.97953	3.67647	2.25456	3.33761	2.89907	0.875362	3.3524	3.24843	5.58649	4.552	3.12438	4.96859	1.58553	4.42763	2.80292	2.41634	3.22158	5.21911	4.55119
PHKA2-AS1	0.0679935	0.604434	0.772722	4.31646	1.40205	1.70099	1.38411	2.08259	0.791241	0.420928	0.766402	2.29799	0.78352	0.328907	0.648047	1.69933	1.11288	1.51474	0.797547	0.272596	1.47453	0.779843	1.49189	2.97433	3.26635	1.90979	0.949913	0.980102	2.615	0.505664	1.22999	1.82611	0.067963	0.521379	1.13662	0.632595	0.858983	0.946586	1.71562	0.762324	1.77358	2.71884	1.84808	1.58555	3.63221	0.492882	1.35853	1.39971	0.902182
PDXDC2P-NPIPB14P	0.682604	1.07158	0.28049	0.950668	0.319898	0.242396	0.930521	1.81479	0.469775	0.150325	0.0925762	1.39819	0.269009	0.618228	0.899947	0.56082	0.521755	0.362068	0.254003	0.192514	0.955046	0.368259	0.461303	2.15548	2.01366	1.76562	0.198675	0.380016	1.31698	0.944973	1.72511	0.137033	0.334257	0.902879	1.31771	0.26384	0.212642	0.462092	1.94536	1.14566	0.230212	0.891008	2.93761	0.373589	1.06991	1.08531	0.352924	2.29287	0.477563
PCED1B-AS1	0.276086	2.37593	2.58827	1.21038	2.1883	1.72873	2.66745	7.94138	1.5661	2.5266	9.31554	4.30315	1.50488	1.18006	2.28125	4.53617	2.55403	3.27286	1.17693	0.884325	2.33198	3.44836	4.89919	4.32606	1.76215	5.05787	1.84692	1.6358	2.12826	1.31451	10.3315	2.00659	0.878991	6.32702	4.15784	1.19686	4.98992	3.34369	9.90403	15.5916	1.94176	1.9347	4.76648	3.24476	2.56646	4.54624	0.932009	2.26692	2.84923
PCBP1-AS1	0.424643	1.4405	0.70678	1.55378	0.978958	1.16874	1.03034	1.22146	2.11613	0.838904	0.710568	1.66325	1.49255	2.91889	1.25893	0.881772	0.716154	0.643298	0.738401	0.67563	1.45883	0.743753	1.35759	2.05849	1.96698	2.03751	0.965706	1.15147	1.77605	1.01758	1.44477	1.1207	2.52577	1.17491	1.87994	0.918954	1.10977	0.913074	1.74665	1.17805	0.542551	1.11173	4.9168	0.588016	1.22437	1.24497	1.25541	1.75446	0.825387
PCAT19	0.818102	5.61445	2.87207	3.19216	4.01493	3.92715	5.25766	1.46218	1.77235	4.22436	2.27229	1.77496	2.46036	0.303768	3.63215	3.08804	3.02976	1.11769	2.84661	5.33827	2.40694	2.11254	4.90743	2.77752	2.99187	2.40521	2.18515	5.78876	3.13599	2.08139	1.91001	3.18901	0.330891	1.03714	6.01685	2.47728	1.77045	1.5286	1.42845	1.81804	3.08029	3.26563	2.72144	0.803966	2.10755	1.83208	2.5329	2.34606	4.65311
PAXIP1-AS2	4.17272	2.75698	1.98802	4.05643	2.09738	3.29789	2.44199	1.77713	3.18465	1.40785	1.07143	7.87373	3.48971	3.58515	4.33448	1.99274	1.8783	3.39789	2.34593	1.39434	3.82764	4.47328	0.879521	2.17245	2.44817	2.86971	2.95986	2.58411	4.42197	6.63377	4.01034	1.30198	2.72743	3.00371	2.39196	5.35387	2.1963	1.92749	4.06637	1.48753	3.23156	2.99301	4.57995	2.29437	4.91591	3.01653	4.22441	2.76931	2.94535
PAX8-AS1	0.154248	0.813264	0.221114	0.652813	0.280456	0.375727	0.205454	0.312297	0.30978	0.133894	0.103551	0.519913	0.203774	0.369077	0.582611	0.0395831	0.325092	0.0850306	0.183756	0.262821	0.820984	0.235004	0.110966	0.413283	0.367556	0.485295	0.291495	0.485013	0.752756	0.277224	0.260567	0.274796	0.39701	0.680101	1.98265	0.270815	1.48442	2.39585	1.20077	0.909656	0.0442584	0.381104	11.1835	0.26977	0.33461	0.507155	0.0857054	1.07931	0.22718
PAN3-AS1	0.386144	1.64997	0.507747	1.67139	0.678207	0.456045	1.18805	1.89528	1.03664	0.340151	0.574126	1.32674	0.431487	0.226413	1.42092	0.856449	0.566693	0.670316	1.06372	0.978458	0.851322	0.424655	1.44788	1.62335	1.27295	1.94638	0.467071	0.806972	1.49001	0.629874	1.6685	0.636907	0.405464	1.55986	1.28994	0.71641	0.486957	0.621303	1.79834	1.32241	1.09067	1.17165	3.37127	0.577832	1.01866	0.985555	0.619955	1.37118	0.832198
OTUD6B-AS1	3.81467	4.7967	3.55516	5.5636	4.93804	6.65075	3.35869	2.49659	8.26003	2.24046	5.54697	5.08624	5.06363	5.89762	4.58208	2.8578	2.90918	4.58101	3.73004	4.98133	5.6022	6.04374	4.27348	3.27163	2.29225	5.31649	5.10355	3.79518	6.07758	6.72295	3.76527	3.35002	4.01806	5.19537	3.00951	13.593	2.96384	3.26391	4.46863	1.85942	3.27928	4.22499	6.27105	3.87335	5.16344	4.07565	6.56287	4.42841	6.45364
OLMALINC	11.6007	2.21114	1.19725	1.99981	1.4298	2.00396	0.72886	3.34578	3.76855	1.81477	1.49562	2.81956	2.65239	1.95278	2.38004	2.01342	1.9341	2.1976	1.05399	1.12865	1.70516	1.94344	2.41629	3.19103	2.21147	3.05621	1.64494	1.41522	2.53955	3.61231	2.65748	2.09483	1.89129	1.70337	2.82218	0.684423	1.24033	0.946992	2.92115	2.5457	1.7587	2.42559	2.13912	1.40541	2.80948	2.60973	1.30774	2.19814	3.51925
OIP5-AS1	11.5087	11.2221	9.89128	9.37909	12.6469	12.9294	8.73771	8.21393	14.5162	7.07907	7.61417	11.9532	11.1612	8.58402	12.8781	8.41754	8.44874	10.6553	9.72105	9.82925	12.8418	14.7367	5.85815	10.4941	5.92145	11.0481	11.3439	9.08077	10.0522	13.2722	15.3817	5.75876	14.7312	14.3141	8.0389	36.7367	7.90915	9.63458	14.6902	11.7189	8.79487	7.60123	23.2113	13.2895	10.762	10.4066	12.8909	10.001	13.0982
NUP50-DT	6.29406	2.25271	0.497987	1.42281	1.51054	0.721113	1.24998	2.32097	4.53137	0.639289	2.35294	1.53334	0.786587	1.45788	1.45983	1.11612	1.04626	0.946447	1.30079	0.632146	1.19891	1.29628	1.6986	2.30496	2.18751	2.48704	0.676185	1.06619	1.86033	2.2265	2.58685	0.910552	0.97755	1.92839	2.57538	0.956021	1.23898	1.01323	1.77865	4.08522	0.923233	1.8713	3.05692	1.34152	2.10872	1.77476	0.439114	2.77655	1.17902
NRAV	2.11224	5.82221	6.00549	7.3359	4.46765	9.25003	3.64479	11.2072	9.82704	4.9601	8.49121	7.9541	4.88995	4.81571	5.70663	6.0866	4.65385	10.624	6.5232	4.64849	9.02871	10.1357	7.05926	6.89089	5.22505	7.98401	6.19064	4.08029	9.98715	4.39981	7.01725	7.33747	6.92679	7.46562	4.92932	3.4841	4.68019	8.07707	8.70784	6.81736	10.0533	4.90947	9.51574	14.5097	8.86587	8.08346	6.57149	8.69118	7.5826
NR2F2-AS1	0.172087	2.0397	0.76504	1.89319	0.50568	0.964009	1.27647	1.69469	1.18236	0.460383	0.535926	1.91404	1.0559	0.360363	1.58678	0.619066	1.20662	0.93175	0.695782	1.2096	1.26708	0.867689	0.866591	1.66524	1.97228	2.28646	0.671291	0.931501	1.80501	0.914141	1.1431	0.549007	0.747111	0.615185	2.34187	1.05172	0.69238	0.952218	1.52512	1.02901	0.852418	1.29181	13.0257	0.772539	0.792969	1.21325	1.54064	2.28326	1.91802
NR2F1-AS1	0.249823	2.1568	1.09589	1.00748	0.467898	0.938282	1.36479	0.352935	0.0891683	1.04943	0.146635	0.851326	0.744315	0.0877349	1.46594	0.954105	0.738275	0.566045	0.342276	3.81632	1.17084	0.438877	0.459618	0.481154	0.61417	0.714098	0.942025	0.861211	0.792844	0.443812	0.666776	0.642355	0.109163	0.398593	0.958468	1.20701	0.334783	0.649716	0.476761	0.525292	0.655214	1.75747	2.28753	0.146063	0.143538	1.16207	1.31294	0.736081	1.15203
NPTN-IT1	0.353146	0.662251	0.307621	0.915806	0.764088	0.393867	0.640399	0.201306	0.415895	0.0596413	0.0275471	1.16761	0.547155	0.229685	1.84302	0.160698	0.310509	0.289632	0.11168	0.23002	1.10445	0.270262	0	0.29425	0.211202	0.565796	0.214207	0.547994	0.881736	0.975984	0.84736	0.00991841	0.341452	0.678009	1.10121	0.315882	0.274442	0.403535	0.762408	0.111794	0.0288993	0.999489	10.389	0.202632	0.962921	0.640583	0.659119	1.21712	0.485116
NORAD	117.517	58.3758	54.4061	81.4267	67.3857	76.7811	57.7058	39.855	47.8968	55.329	46.5403	84.2709	71.4928	50.5768	89.6502	50.8787	55.4393	52.8108	53.5989	80.7999	68.6698	74.6577	48.8517	49.1268	45.5292	58.1949	55.6259	67.9782	67.0036	149.772	69.3452	48.7949	68.7578	60.2304	48.8546	135.429	44.169	60.2753	49.9477	41.1328	94.1731	63.6965	108.59	68.2832	105.516	47.4288	98.7147	55.135	85.1224
NNT-AS1	13.1946	3.84431	2.24138	2.03677	1.44605	3.20889	2.2485	2.31986	4.02595	2.86342	2.29068	5.69956	3.3333	4.34652	2.89367	2.24096	2.58131	3.8252	2.74058	2.66119	4.01799	2.84107	2.27798	4.35698	3.04596	2.78688	2.34472	2.26258	3.61988	9.78447	1.68731	2.20931	5.85308	2.31558	2.44009	7.59691	2.06153	2.34596	2.37522	3.35302	3.98403	3.42409	4.94325	3.43177	5.32109	3.94091	4.42921	2.12668	3.64684
NFYC-AS1	0.459168	1.32135	0.329168	1.37568	0.344678	0.552757	0.715924	2.10156	0.914594	0.262314	0.211249	2.00239	0.691095	0.971347	0.906361	0.401485	0.714354	0.451601	0.34349	0.161009	1.78308	0.62882	0.404479	1.61625	2.18175	2.88499	0.271182	0.40258	1.42947	0.730084	1.10684	0.120802	0.674393	1.58083	1.9475	0.686217	0.51996	0.497558	2.21398	1.81548	0.299837	0.974846	3.69314	0.377051	0.953496	1.55265	0.681606	2.37423	0.517244
NEAT1	76.3685	24.9278	14.2227	31.7764	13.9255	9.86075	17.3156	39.3546	33.2167	6.10024	10.53	74.3729	14.4963	35.6048	20.625	16.9181	17.7069	18.7064	8.30349	6.14582	49.2165	10.1957	24.8742	41.7065	42.0983	75.7569	5.09284	10.9973	68.7211	68.684	21.502	6.19627	24.5369	26.7932	166.643	20.8534	6.54499	14.9937	55.8464	27.4678	3.58377	51.2152	679.373	12.4531	49.701	16.7875	13.1883	75.5065	16.9973
NDUFV2-AS1	0.452618	1.15056	0.581675	0.817626	0.701368	0.325594	1.02097	1.83392	1.42556	0.855761	1.06866	1.62079	0.530658	0.732363	0.865119	0.886834	0.801958	0.552095	0.841685	1.13808	0.834059	0.559376	0.85771	1.33836	1.1785	1.82017	0.716059	0.586596	1.38432	0.64116	1.96178	0.332066	1.0446	1.49768	2.19455	1.17949	0.798504	0.528973	1.78525	1.70309	0.752533	1.16279	6.84124	0.686482	1.07336	0.777381	1.16978	2.20264	0.785125
NCK1-DT	0.88501	2.90279	1.17722	2.50192	2.29348	2.56361	1.37898	1.88372	3.12288	1.09577	5.20783	2.975	2.49132	2.33931	2.72577	1.63915	1.81563	1.87101	2.28705	1.24185	1.95022	3.50723	3.16745	2.84825	1.33844	3.40587	2.11957	2.40134	2.18095	1.91185	3.75521	1.02998	1.91666	2.55792	2.89888	2.45689	2.14843	1.66188	3.51455	3.17519	1.61596	2.31609	5.86334	1.09258	1.17568	3.72704	1.68881	2.20727	1.76143
NALT1	0.203418	0.694816	0.150115	1.03771	0.194342	0.168355	1.02244	1.8405	0.0654519	0.187722	0.308285	1.03494	0.0956767	0.923756	0.482131	0.285323	0.36487	0.0396357	0.170432	0.266297	0.379476	0.0994916	0.648071	1.07144	1.13748	1.67485	0.23199	0.147842	0.216012	0.164659	0.680299	0.0208123	0.154916	1.31985	1.7593	0.0174429	0.662256	0.188168	1.71645	1.35537	0.181922	1.19034	0.276447	0.132872	0.509242	1.22379	0.28705	0.506187	0.41643
N4BP2L2-IT2	0.164874	0.955305	0.217099	0.487422	0.526088	0.255396	0.848204	1.62458	0.398048	0.160108	0.235784	0.700204	0.487486	0.326169	0.833067	0.556918	0.727737	0.270442	0.165901	0.233295	0.633235	0.166023	0.697705	0.860626	1.20626	2.11323	0.161302	0.328941	0.779432	0.309115	1.11114	0.0833511	0.245584	0.930559	2.62321	0.787833	0.336339	0.745222	1.61659	0.811898	0.175399	0.727275	17.7495	0.425713	0.880846	0.968629	0.287402	2.93846	0.65887
MUC20-OT1	4.03948	1.71599	1.06539	3.44286	2.40391	1.24612	2.53468	5.01017	3.64711	0.714693	1.74387	4.78295	1.7029	0.417138	2.92037	3.155	3.8097	0.722036	0.734912	0.358068	5.00951	1.224	2.47497	3.60605	5.25491	3.5545	0.431157	3.87428	7.48648	5.47976	2.48042	0.144105	1.8867	3.1091	5.63133	1.76094	1.54422	0.689829	5.33144	0.873361	0.262424	5.19679	9.24104	0.524078	5.68203	1.66445	1.29303	8.84605	1.66957
MSC-AS1	0.108174	4.41714	2.83038	4.88094	4.0658	6.88967	3.43425	0.888069	5.87765	1.33528	2.01827	4.60402	6.73048	2.80586	4.46503	1.64144	2.33966	4.26158	2.92869	1.06909	5.08249	4.9128	2.12105	1.69157	1.10492	3.96429	11.3495	2.12456	3.12533	3.68476	4.14659	2.25212	7.0709	4.09252	3.59158	7.16652	4.29982	3.61302	3.91819	0.90256	3.70623	2.83625	6.18807	4.41701	4.85215	2.52178	5.7109	3.92389	4.47286
MMP25-AS1	0.249135	1.36362	0.857093	2.45595	0.818752	1.3473	1.21866	5.71743	1.66218	0.835106	0.936625	4.13301	1.01982	0.61056	1.69905	1.12563	0.815426	1.29149	1.07703	0.68255	2.5442	1.20646	1.25644	2.14112	3.28501	4.11108	0.712517	0.914674	2.40225	1.1406	4.65985	0.529764	0.208803	3.03904	3.74576	0.336082	0.763467	0.991204	5.8355	4.97137	1.10409	1.4562	1.67543	1.00056	1.99199	3.89741	0.73113	2.75345	0.894238
MIR99AHG	0.502723	1.50053	0.63217	0.642091	0.438667	0.647554	0.632431	0.799354	0.125092	0.779406	1.16188	0.338246	0.484257	1.874	1.01812	0.405136	0.894004	0.817597	0.353809	0.470556	0.302785	0.812393	0.669584	0.387765	1.00764	0.846699	0.461535	0.617075	0.815161	1.30626	0.751989	0.337413	0.390512	0.22367	1.59899	0.158637	0.352955	0.479916	0.678718	0.412262	1.11101	0.687352	7.13657	0.79336	0.444951	0.575142	0.794538	1.43749	0.829424
MIR600HG	1.85982	0.46645	0.281125	1.11108	0.747922	0.267141	0.531138	0.844818	0.428413	0.184878	0.164652	0.633636	0.782809	0.284794	1.1228	0.403225	0.274837	0.170554	0.453193	0.877568	0.69242	0.300284	0.15204	0.475461	0.478093	0.616745	0.242535	0.415152	0.517403	1.13765	0.371072	0.722753	0.887244	0.785366	0.911878	0.0634286	0.24082	0.352387	0.69385	0.19904	0.28299	0.814175	3.36045	0.164278	0.624232	0.652932	0.927574	0.928706	0.877728
MIR503HG	0.0565262	5.22132	1.91747	2.3051	1.3441	1.15114	4.87735	1.44768	0.311215	1.48089	0.549695	8.61402	1.22831	1.14583	3.02632	4.45684	3.30365	2.02169	3.08036	0.625908	16.6874	1.3676	2.43989	8.3483	5.65124	7.0381	1.60762	2.70536	3.33099	2.00849	3.6892	2.37503	0.979347	2.40063	15.7147	0.305365	1.09217	2.51333	5.39176	3.88703	2.41156	6.29698	2.94475	3.42889	1.51247	3.70731	1.50588	3.26715	4.82017
MIR4435-2HG	0.610022	5.86981	4.11003	3.70684	7.726	1.70632	12.2534	3.59941	2.64181	4.5694	4.35298	3.77951	3.17677	2.34682	4.94489	5.98618	5.35588	3.2774	4.74209	7.57987	2.30374	3.88797	3.95766	3.83073	4.52678	2.58885	3.53182	7.8828	4.472	1.7994	3.76218	4.09718	2.05976	2.83031	2.96445	1.9737	2.49884	3.75011	1.75551	5.89188	3.60934	6.68467	15.3724	2.99675	2.65989	2.9968	2.39828	4.01415	4.03919
MIR3936HG	1.44418	3.29053	2.10945	5.01291	1.15948	2.41297	1.62421	6.59532	4.94353	1.41189	2.1499	4.86623	1.39548	3.36489	3.87523	2.38056	4.09901	2.01254	1.48467	0.373952	9.27454	4.1374	2.65904	7.26836	9.25984	6.72531	1.89945	1.47634	6.38777	1.9713	2.38463	1.91802	2.41879	5.78997	9.84965	2.60389	2.50007	2.55102	5.58463	4.15897	0.846749	5.99371	19.8521	2.19605	5.07344	5.78352	4.90423	11.9427	4.03509
MIR3142HG	0	0.631799	0.227136	0.48158	0.635588	0.289471	0.234818	1.19839	1.03161	0.0517779	0.373532	1.43811	0.547399	0.465273	0.945831	0.349543	0.400503	0.112448	0.1511	0.0393485	1.07017	0.404573	0.859988	0.704111	1.59258	1.3934	0.0959821	0.209716	0.49737	0.233572	0.350914	0.167294	0.320469	1.52372	1.00569	0.503107	0.190607	0.320303	1.93051	2.19374	0.038231	0.464566	1.75531	0.100523	0.434974	0.569169	0.277626	0.435171	0.269831
MIR29B2CHG	0.530486	0.323369	0.185822	0.673542	0.434737	0.19797	0.35247	0.459518	0.341379	0.0663616	0.167492	0.994398	0.39323	0.276514	0.470117	0.259753	0.387862	0.235212	0.251862	0.363436	0.815258	0.148757	0.203536	0.39655	0.449969	0.479165	0.185533	0.18278	0.374899	0.553937	0.517185	0.105656	0.628891	0.438667	0.741388	0.12009	0.220264	0.319293	0.718519	0.302708	0.0379543	0.651729	21.7846	0.125668	1.36402	0.362747	0.842046	1.12006	0.799076
MIR222HG	2.31593	1.4616	0.48675	0.728209	1.06924	0.0837075	0.29672	0.459699	0.392069	0.171118	0.0752724	0.874637	0.164461	0.109833	0.504941	0.471195	0.0661801	0.160004	0.291294	0.292592	0.455332	0.0388678	0.196009	0.610123	0.571339	0.596327	0.271891	0.0705913	0.532011	4.50286	0.157045	0.430922	0.48416	0.529011	1.82595	0.211244	0.157482	0.323446	0.468737	1.26264	0.0473804	0.317398	4.19649	0.290687	1.55304	0.478092	0.22428	0.70111	0.560357
MIR210HG	0.715163	9.02786	7.70535	25.5561	4.18303	15.2241	5.2858	22.3893	11.5976	10.149	9.15849	24.7026	9.53057	0.329474	9.50664	11.4173	7.17138	9.65529	8.57842	12.0383	8.40503	6.63193	27.5275	19.0174	23.3851	25.4812	5.79766	9.34049	11.2793	4.0571	8.39285	8.41945	1.60669	10.5821	20.1128	2.63286	8.41567	9.34104	15.0219	15.3461	5.82737	18.7945	9.18225	8.14696	11.774	8.68027	13.7494	18.2384	11.3437
MIR200CHG	0	0.276908	0	0	0.0503438	0.0475766	0.0454047	0.46896	0	0	0.0598953	0	0	0	0	0	0	0	0.0662249	3.31121	0	0	0.129972	0	0.275529	0.131807	0.0450724	0	0.0291951	1.15168	0	0.194089	0	0.0532838	0.244877	0	0.134261	0.0584934	0.0518029	0.162048	0	0	0	0	0	0.0623646	0	0.143047	0
MIR155HG	0.118564	5.30626	1.36785	0.744842	1.70697	0.582813	2.11557	13.1514	3.08584	0.372315	4.76917	8.80416	0.208193	0.546221	0.871938	3.40416	1.03675	1.37457	2.18749	0.724327	1.4561	3.41654	3.36913	9.17514	2.52137	4.59884	1.24231	0.312768	2.58012	0.846761	7.75912	0.580245	0.395035	7.96093	9.44562	5.04099	2.23209	5.13096	11.8645	32.6831	0.426103	2.1071	8.16388	2.69252	1.61972	4.25639	0.354898	4.39646	0.734151
MINCR	0.427561	1.21406	0.650976	0.267859	0.865341	0.84148	0.780443	4.46263	4.5785	0.533015	1.26825	1.50473	0.681627	2.13046	1.20743	0.723101	0.837551	0.767325	1.10532	1.06974	0.545735	0.97846	2.76828	3.2766	2.21926	2.08499	0.415436	0.903163	1.07638	0.430341	2.20302	0.660778	0.689788	0.955695	1.70804	0.243133	0.958781	1.09285	2.24541	3.65329	0.657424	1.50703	1.00921	1.93439	1.00494	2.33035	0.899243	2.40533	0.8241
MID1IP1-AS1	5.63388	0.721729	0.521251	1.44576	0.749802	0.575728	0.76077	0	1.89393	0.316864	0.278768	1.22233	1.32889	2.96354	1.15764	0.37528	0.226242	0.535223	0.369873	0.62608	0.74511	0.863672	0.24197	0.420384	0.256476	0.613465	1.00694	0.712996	0.570702	7.83183	0.984262	0.120445	1.06463	0.942386	0.53187	0.403784	0.749863	0.217794	0.723311	0.452528	0.760375	0.656077	2.97118	1.15344	2.85204	0.290261	1.13265	0.0665778	0.847955
MHENCR	2.99986	4.59785	2.50799	4.67229	1.27588	1.51758	2.53949	13.6473	5.57128	2.65608	3.58549	6.08206	1.93637	3.92788	3.7342	4.19264	3.73473	2.33295	2.89372	1.98941	2.87175	2.09467	12.4658	16.5514	17.0156	10.0213	0.965033	2.9899	5.47272	1.77528	6.76238	2.88347	2.55137	6.49583	13.1253	0.971401	2.50308	3.50157	8.21667	13.8783	3.43202	4.51691	4.55963	3.53742	3.5924	5.28659	1.79	8.40692	2.05306
MELTF-AS1	0.541292	0.901958	0.44452	1.85399	0.881791	0.657886	1.11618	2.68036	2.33413	0.298861	0.957063	1.08948	0.283317	0.0959123	0.852494	0.953915	0.746856	0.706738	1.03785	0.858508	0.543726	0.427666	1.99694	2.63672	2.52588	1.41759	0.84486	1.00425	1.22907	0.894567	1.52121	0.357847	0.295958	1.03153	2.98482	0.166619	0.701364	0.880738	1.65551	5.40279	0.637181	0.902417	1.99938	0.456922	1.17687	1.76307	0.822591	1.23078	0.736637
MCF2L-AS1	5.83938	0.46281	0.0917558	0.17619	0.42071	0.0467748	0.401755	0.645479	0.0333388	0.239047	0	0.0322751	0.0731013	0.0306866	0.282155	0.138727	0.258865	0.020189	0.0976631	0.839283	0.227807	0.212845	0.319455	0.13875	0.248311	0.0971893	0.221564	0.602442	0.215273	1.28952	0.496153	0.127212	0	0.104771	0.441375	0.0533086	0.351996	0.172523	0.407438	0.438122	0.154441	0.577446	1.68974	0	0.251022	0.245254	0.0797524	0.421909	0.117841
MCCC1-AS1	0.413294	0.836155	0.192147	0.273305	0.161232	0.217671	0.643975	2.36013	0.620581	0.0222485	0.137016	1.29168	0.367399	0.942499	0.671107	0.424238	0.426261	0.244274	0.121196	0.165696	0.616798	0.268849	0.38652	1.3172	1.15554	2.11064	0.123728	0.490616	1.33572	1.25873	0.967536	0.0591993	0.220324	1.09702	2.53947	0.595383	0.327609	0.294378	2.65447	1.37159	0.0574964	0.994263	3.31385	0.415742	0.817708	0.913051	0.371135	1.2762	0.28516
MALAT1	53.9313	30.9141	19.1793	39.5255	20.4702	13.795	72.2266	35.4669	20.1285	24.1509	17.6638	63.837	22.277	19.9397	24.179	40.9358	34.3393	10.3142	11.6992	6.36837	55.0588	13.6573	13.4653	56.4825	95.2877	98.0429	12.2887	14.202	90.6551	73.3172	45.4317	10.3119	23.2897	35.0024	225.909	23.5928	9.26231	37.875	82.7089	26.5186	10.7663	26.4084	4562.03	22.3048	19.7182	47.951	12.7966	104.754	22.1818
MAGI2-AS3	2.56608	4.00177	1.38247	0.924442	2.01743	0.893826	3.33417	1.62654	0.436969	1.97507	1.07116	1.30466	1.26975	8.4219	3.81532	1.61801	1.36229	1.47764	1.44555	1.87079	1.57157	1.028	0.534145	1.01807	1.23741	1.06353	1.14668	2.12624	3.8412	3.87386	1.43981	1.04794	3.07374	0.95292	1.96604	1.81698	1.13588	0.801296	1.02313	1.87105	1.86533	2.45624	11.1735	1.81064	1.94025	2.44845	2.90391	3.12027	4.47627
LINC-PINT	2.92756	1.35981	0.587636	0.697573	0.865286	0.35909	1.01812	0.813694	1.45035	0.382199	0.615419	1.20236	0.351248	0.966489	0.453839	0.633019	0.525915	0.403259	0.311423	0.389407	0.711903	0.52348	0.645643	1.57035	1.39405	1.58529	0.50045	0.371741	1.7016	1.87833	1.2281	0.416978	0.421269	1.02712	4.19498	1.41949	0.643092	0.889383	1.34111	1.81696	0.374629	0.66621	12.7735	0.864084	1.47295	1.2727	0.344505	3.39833	0.477944
LINC02446	0.0546377	0.156319	0.244612	0.120437	0.365399	0.345314	0.2197	1.3615	0.164082	0.215693	1.8355	1.21783	0.0719559	0.604115	0.167155	0.162564	0.571686	0.182166	0.0801107	0.667582	0.662521	0.399067	0.524083	1.09261	0.185167	0.744073	0.0726974	0.267675	0.2119	0.180594	2.98454	0.156524	0.242725	2.49231	0.789926	0.590325	1.55194	0.495307	2.71547	1.11081	0.658758	0.118416	0.396016	0.233169	0.391224	0.452647	0.0327095	0.288401	0.483312
LINC02084	0.0144238	0.725116	0.253333	0.228918	0.192923	0.69889	0.43499	3.65412	0.476477	0.248469	1.9701	1.13222	0.256441	0.279091	0.356413	2.1243	0.491567	0.393464	0.253781	0.214787	0.457428	0.977778	0.747105	2.14526	0.674576	2.25191	0.129542	0.16307	0.45684	0.337131	3.42271	0.165283	0.192231	1.83771	1.4076	0.190471	1.42918	0.410948	4.59892	4.81266	0.300991	0.337616	0.862492	0.369326	0.521832	1.55343	0.336765	0.662376	0.229661
LINC02062	0.529155	0.364963	0.307516	1.09351	0.368626	0.418037	0.498692	1.99161	0.546254	0.35607	1.40341	1.29803	0.283107	0.77705	0.653771	0.619918	0.444911	0.631518	0.242455	0.340949	0.524416	0.226458	0.285504	2.43875	1.34498	2.075	0.330028	0.3739	0.855087	0.491911	1.16135	0.52109	0.264458	0.897352	1.49419	0.238216	0.491542	0.471129	2.54138	1.00856	0.368073	2.40836	2.60683	0.846824	1.23389	1.4156	0.534574	1.99009	0.912752
LINC02048	0	0.689535	0.719332	1.2396	1.05463	1.03427	0.421743	1.8536	2.17133	0.41325	0.497155	1.21971	1.04038	0.209729	0.82556	0.661306	1.51305	0.430181	0.549693	0	1.32383	0.904604	0.770588	1.37224	1.86953	1.02893	1.19362	0.64587	1.89826	0.379339	1.87122	0.345218	0.452063	0.336973	4.45231	0.36434	0.336095	1.71087	0.941871	1.37709	0.76992	1.00986	12.9073	0.587729	4.32943	1.01065	0.937845	5.62576	0.805392
LINC01943	0.085741	1.1433	0.852613	0.992237	1.38574	0.293523	2.18712	1.37986	0.209209	0.323094	1.91868	0.592023	0.317582	0.177753	0.544799	1.25321	0.836251	0.409309	0.440003	0.871647	0.0799747	0.917347	0.817285	0.817112	1.04608	1.01648	0.780746	1.0057	0.394876	0.220141	1.32295	0.629419	0.0714187	1.26436	0.619802	0.192995	1.56107	1.24918	1.59799	5.61401	0.551674	1.32401	4.31134	0.842887	0.181757	0.725121	0.44272	0.644924	0.489197
LINC01871	0.715611	1.67512	1.00818	1.72081	2.53791	0.548208	2.48511	9.59149	1.66063	1.33079	9.57586	3.21529	0.514056	1.16887	1.14823	0.871019	1.22524	2.36618	0.476928	0.596154	2.00245	1.38093	8.04974	2.11403	2.84411	1.80354	9.08867	0.88259	1.80818	0.829395	3.1844	2.23642	0.260105	4.9885	1.99865	1.32767	4.64113	4.46523	4.99908	6.06847	3.71065	2.36872	3.89009	4.16442	3.53042	2.06599	0.467355	0.927157	1.51923
LINC01857	0.257049	1.81229	0.763513	0.212478	0.680461	0.0676903	2.48711	1.00083	0.192986	0.415125	9.0756	0.887433	0.825153	0.266449	0.136107	1.40532	0.403434	1.49005	0.235556	0.184026	0.599404	2.00213	0.693451	1.24492	0.261342	0.656357	0.384764	0.290609	0.851524	0.705492	0.581246	0.690358	3.16884	1.74364	1.10327	1.04147	7.38618	1.70606	1.40036	8.53059	0.3576	0.62674	2.27065	1.11656	0.544901	1.99643	0.317389	0.457925	0.409283
LINC01802	66.0451	0.148249	0	0	0	0.031839	0	0	0	0	0.0400829	0	0	0	0	0	0	0	0	0.0346236	0	0	0.0434898	0	0	0.0441038	0	0	0.0195378	9.37708	0	0.0865917	0	0.0713167	0	0	0	0	0	0.0542227	0.0420505	0	0.246469	0	0	0.0834708	0	0.0957294	0.0320853
LINC01801	0.0139528	0.427705	0.360382	0.738142	0.155519	0.492353	0.0631177	0.289737	0.0628523	0.210311	0.157272	1.66315	1.38734	0.0482101	1.27074	0.155676	0.2315	0.742199	0.460301	0.431527	2.22547	1.54775	0.50188	0.392371	0.304995	0.162869	0.480361	0.465346	1.36635	0.751068	0.118778	0.239828	0.455586	0.156371	0.353015	0.100501	0.504615	0.514979	0.320053	0.0625738	0.281456	0.562462	1.78242	0.0765569	0.141973	0.0770613	1.51607	0.154663	1.43664
LINC01786	0.184895	0.79348	0.382047	3.26048	0.377824	0.908871	0.526624	4.7993	2.22103	0.0995329	0.245186	2.46373	0.344958	1.23512	1.04429	0.412588	0.829112	0.784576	0.632557	0	1.69586	0.485318	1.0641	3.08118	3.75965	2.47299	0.153756	0.661942	1.07561	0.371045	0.688617	0.529678	0.328554	0.83613	2.95157	0.0739877	0.335871	0.478893	2.93348	3.15094	0.428702	1.48267	1.92643	0.507245	0.870992	0.893528	0.415085	2.1471	0.45795
LINC01671	0.284998	12.3291	22.1478	27.94	12.3591	30.6862	2.02339	22.7849	32.7908	6.06971	32.0887	20.4035	39.4158	4.73904	13.3238	10.7717	15.6875	24.2788	23.0481	13.8846	21.4825	17.4049	35.7772	8.96069	5.15226	13.9697	13.2246	27.5588	16.2744	28.1277	7.93237	16.1121	10.9794	13.1648	7.69351	10.2748	11.4191	6.59739	18.4477	1.80535	14.769	16.5383	16.9208	14.9533	9.47508	7.39065	43.6355	14.625	19.9193
LINC01612	13.112	0.0413296	0.0348241	0	0	0	0	0	0	0	0.044698	0.0979951	0	0	0.023797	0	0	0	0.148265	2.12356	0	0	0	0	0.0342697	0.295091	0.0336361	0	0	3.62882	0.0717353	0.193124	0	0.079528	0.182744	0	0	0	0	0.241863	0	0	0	0	0.0762165	0	0	0	0
LINC01569	0.759086	1.25524	1.95703	2.77236	1.46707	2.5748	0.574059	7.4042	5.46897	1.69452	2.21639	6.25619	2.09568	3.72489	1.10133	1.85861	3.14785	4.52134	2.5323	0.542447	2.34496	1.43534	4.79953	6.40613	5.6006	4.53196	1.70262	1.86598	3.7317	2.27389	1.48211	1.96512	0.501189	1.62668	4.48042	0.710624	2.60143	2.36293	3.30671	3.87274	2.11205	1.9742	2.17678	2.71298	4.88942	3.80782	1.257	3.47377	1.75937
LINC01534	0.388961	1.49891	0.416207	1.83725	0.294189	1.49252	0.488759	0.894239	2.50305	0.343992	0.939483	5.02811	1.51845	1.03676	1.12785	0.855558	0.847181	1.50314	0.794349	0.397807	1.59374	1.07486	1.47904	1.16326	1.46884	1.27696	0.748566	0.989423	1.8946	1.04294	0.827793	0.537241	0.647977	1.24547	1.35565	0.633707	0.743274	0.737592	1.81629	0.473471	0.637741	1.06579	5.89013	0.838426	2.71704	0.767228	1.6591	2.57372	0.85525
LINC01532	5.99768	0.182411	0.428739	0.238178	0.0785454	0.206189	0.0629684	1.41455	0.599603	0.11802	0.508769	0.0682908	0.505272	6.9583	0.204532	0.104833	0.540709	0.370221	1.25135	0.00896888	0.730329	0.444997	0.822387	0.127219	0.0796063	0.434135	0.171896	0.274416	0.511167	12.0509	0.158304	0.213091	5.7915	0.424898	0.198101	0.0657974	0.209471	0.03042	0.386148	0.196641	0.217854	0.0101818	0.234099	0.673061	0.0708183	0.183789	0.316402	0.136387	0.0831134
LINC01507	2.41026	4.17225	3.36904	6.65676	0.750642	6.38444	0.142526	1.25126	5.48192	0.992205	1.97413	1.28811	6.55853	5.24176	2.90281	1.10733	2.47953	2.03049	4.0017	0.284209	4.62858	7.08702	2.7539	1.94922	0.828851	6.20617	1.94539	2.52458	4.97168	2.4854	1.28239	2.23391	4.29873	1.58896	2.56224	3.319	2.2126	1.33118	3.78068	0	1.13414	2.3046	6.16578	2.59309	2.76507	1.56611	8.72126	5.55671	2.2951
LINC01481	0.306291	0.660745	0.249237	0.431315	0.353221	0.562037	0.521212	0.772283	1.25731	0.293391	0.683863	1.11492	0.354842	0.569959	0.629414	0.409971	0.608746	0.646887	0.490848	0.253622	0.631815	0.600514	0.983418	1.40528	2.15544	1.18389	0.797966	0.806511	1.1175	0.375147	0.937384	0.263957	0.395919	1.40152	1.3336	0.414625	0.333646	0.552868	1.11182	1.45099	0.7011	0.824182	4.09608	0.657214	1.51144	0.88707	0.382856	1.14604	0.596016
LINC01428	0.0180875	2.12909	2.14902	1.31571	0.907226	0.971673	0.418201	9.50262	4.5356	0.389477	0.575653	2.02454	0.905185	0	2.79659	0.807238	2.80637	3.6841	2.14814	0.269343	6.20856	10.094	0.67663	1.28857	4.68935	6.04368	1.75081	2.02445	2.33828	3.39492	4.71553	1.06223	0	6.89214	3.53026	2.73594	1.18285	1.14778	8.19422	1.26542	3.32151	1.3642	9.93076	5.12759	3.49684	4.67021	5.40874	5.24151	1.78558
LINC01355	0.24973	2.28943	0.369012	0.987017	0.799454	0.31811	1.60259	1.74266	1.0421	0.206343	0.207939	1.50694	0.376689	0.381271	1.35922	0.832012	0.893276	0.377583	0.187337	0.222859	1.22426	0.33007	0.760401	2.203	3.32138	3.09725	0.324548	0.387389	1.56165	0.376381	1.66242	0.103985	0.623077	1.39767	3.92535	1.78484	0.468993	1.24476	2.18145	2.9692	0.258544	1.20835	8.76877	0.531098	2.13725	2.63022	0.302485	4.52015	0.582574
LINC01320	0.0432356	23.7933	18.1639	54.5153	14.2382	25.1475	15.7929	44.7763	16.2832	15.6067	16.9969	27.2364	20.3275	1.13536	32.6555	35.0097	21.6263	46.9299	25.1381	14.9611	35.5765	48.8914	17.1522	25.7906	20.5242	27.098	17.054	8.41631	35.2102	15.6204	24.1789	10.6125	19.607	21.0929	35.04	26.0273	17.245	22.8243	29.2792	12.6915	22.9001	12.0317	333.443	21.753	54.9514	16.4223	83.6755	58.2138	18.0656
LINC01278	4.42608	5.12317	4.85444	4.44771	2.93074	4.97022	5.21168	4.86825	5.18356	2.83624	2.69477	6.841	5.00817	5.7953	5.64951	4.91955	4.86744	5.74847	3.12126	3.97988	5.49223	4.50704	1.72933	5.33055	4.3589	6.14715	3.86779	3.47419	6.03262	5.54313	5.83586	2.53451	7.41808	4.81509	6.60594	3.47486	4.10809	4.77878	8.20571	5.84151	4.57844	4.44076	6.75602	3.79372	5.55319	5.90944	6.7252	6.76553	3.817
LINC01268	0.0229524	7.14836	1.16195	1.54058	0.818658	0.682996	1.40169	10.1043	1.67151	1.09967	2.90672	4.3374	1.80232	0.7772	3.07884	2.79137	2.09966	2.14444	2.26318	0.124884	3.48964	2.70716	2.86482	7.15019	14.1648	1.59078	0.921898	1.58938	4.06877	0.711233	3.22395	1.7589	1.65183	3.01909	5.20568	1.61191	0.983607	0.683661	4.36987	2.666	2.90571	2.46237	5.58347	1.45877	2.20571	3.05824	2.29299	2.18075	1.06592
LINC01230	46.76	0.224868	0.0378945	0.00693002	0.00584035	0	0	0.0652845	0.0236035	0	0.00694841	0.00761679	0	0	0.00739861	0.014031	0	0	0.130606	0.0600204	0.00488742	0	0.00753901	0	0.0213093	0.00764543	0	0	0.0270952	13.0191	0.00557572	0.060043	0	0.105084	0.0946934	0	0.0155755	0.00678577	0.0120192	0.0563973	0	0	0	0	0.011848	0.00723488	0.0141159	0.0331896	0.00556201
LINC01187	107.203	0.443963	0.0917558	0.0271061	0.022844	0.0143922	0.0274704	0.0425591	0.0410324	0.00735528	0.0181187	0.0397232	0	0.00944202	0.028939	0.0121958	0	0	0.370619	0.179986	0.0764667	0.0140337	0	0	0.0347288	0	0	0.00772361	0.0353268	148.027	0.0145393	0.264209	0.00910481	1.75694	0.1605	0	0.0135383	0.0353892	0	0.0612758	0	0.0355351	0.12998	0	0.00772375	0	0.0736176	0.0865453	0.0217553
LINC01176	0.637751	3.62554	0.678858	1.81474	0.797008	0.834626	2.99182	5.25717	1.2478	0.769859	0.84571	4.21391	0.814445	0.507491	1.9511	1.6215	1.16126	0.333883	0.566716	0.243508	2.52365	1.32331	5.31092	4.99989	15.4634	6.65482	0.752125	0.873958	2.62328	0.834972	2.71454	0.581318	1.28781	2.91823	7.05494	0.626408	0.68936	0.850943	4.36651	5.8589	0.24197	1.63351	7.09126	0.636227	1.15802	3.30883	1.21481	5.47793	2.6053
LINC01150	0.200743	0.799957	1.45178	0.398245	1.23063	0.634355	1.10989	1.35477	1.50713	1.83709	1.26446	1.24018	1.421	0.208084	1.94871	1.11988	0.675134	1.77971	0.515082	0.632349	1.59156	1.16838	1.37193	0.627239	0.306143	2.19679	1.00161	0.567379	0.875853	0.568728	4.48585	0.718849	0.601958	2.72339	0.725562	0.42173	2.08851	0.389956	2.47503	1.80054	0.558537	0.913647	0.818434	0.550724	1.41847	2.84106	0.315465	0.953647	2.0776
LINC01138	0.441578	1.16656	0.99538	0.647729	1.16783	0.13954	0.912014	2.82591	0.626885	0.76932	3.16207	1.83232	0.618551	0.255217	0.751045	1.03912	1.28529	0.967307	0.941745	0.855287	1.16075	1.39363	1.85404	2.81469	3.3998	0.995751	1.19777	0.589999	1.56466	0.571499	3.83598	0.575006	0.379854	2.90301	2.7858	1.06985	0.938714	1.21651	3.10317	2.09556	1.64189	0.960513	4.51718	0.991177	2.94097	2.40558	0.904819	0.96624	0.67753
LINC01094	0.241065	0.801355	1.40578	0.984816	2.85413	1.55176	2.52564	1.73536	2.86359	1.4938	1.42076	4.29071	2.53274	1.54741	1.44474	0.74593	1.01373	2.99084	1.20174	0.570674	2.46838	3.49574	1.01741	1.52654	0.642683	1.48512	2.63546	0.829727	1.22924	0.975123	7.32504	0.759651	2.77725	2.06021	1.21014	2.96469	3.74211	2.1992	2.03367	3.45952	0.983733	1.19121	5.92609	1.66561	4.1366	3.37289	0.500297	1.07734	2.32574
LINC01089	1.40409	3.25562	0.482229	2.29723	1.01065	0.757633	2.33452	4.74295	0.907667	0.724962	0.867555	3.00318	0.879225	0.32255	3.43036	1.23621	0.8681	0.546177	0.577785	0.591627	2.47302	0.780677	2.8404	3.21809	6.55814	4.3654	0.587948	1.08567	2.18857	1.47412	3.65181	0.400047	1.11155	2.4598	3.59532	0.215866	0.981831	1.50126	4.92328	5.12676	1.04852	3.04475	4.57546	1.16855	2.8721	3.53933	0.872644	4.4105	1.11275
LINC01023	4.09716	2.26735	3.85837	3.8363	0.8891	3.24634	2.18692	7.60447	2.61327	6.48014	7.59682	3.90025	1.55189	2.45549	2.53422	4.49854	2.63395	4.58271	4.78459	3.65486	2.77321	2.30894	10.9031	7.74914	4.3499	3.54459	2.74983	2.04959	3.2811	2.08015	2.39211	5.29739	1.25638	1.53985	6.15937	0.130581	3.62854	2.39474	2.32875	6.3091	6.10339	7.68533	2.26665	2.321	3.60735	1.75222	5.33975	4.65067	4.19515
LINC01011	0.151843	1.91009	0.836672	1.65121	0.858765	1.25585	0.994994	2.89618	1.05555	1.02932	1.49898	1.55325	1.26649	1.29803	1.50081	1.82719	1.40719	0.782393	0.857554	1.37857	1.13829	1.38245	2.13615	2.59364	3.28769	2.85559	0.864248	1.16352	1.46495	0.756812	2.04066	0.990814	0.704533	2.10311	3.94335	1.72158	0.746691	0.837552	2.88961	1.38211	1.20485	2.47913	2.52212	0.627425	1.76757	2.94296	2.72202	1.85234	1.27153
LINC01004	1.9848	4.2332	0.259934	2.10742	0.732234	0.898108	1.86878	4.03447	1.19631	0.511657	1.33454	4.10427	0.616662	0.946589	1.77626	1.13533	0.965245	0.31774	0.450868	0.336226	1.90346	0.708247	1.40775	6.77818	9.40761	4.28286	0.362651	0.632093	3.52355	1.35629	3.71838	0.280294	0.596103	2.39094	4.04159	2.34916	0.55398	0.579245	2.66114	2.70797	0.583353	1.8903	7.59819	0.715795	1.13779	5.94422	0.677789	3.12085	0.845706
LINC00989	0.042515	3.00615	0.878486	0.965266	0.339612	0.985226	1.75941	0.161855	0.170236	0.312786	0.0845676	0.216305	0.681222	0.0489665	1.80094	0.872815	1.52518	0.115976	0.259734	1.19314	0.522134	0.596789	0.305852	0.425094	0.48268	0.217119	0.502039	1.03341	0.632059	0.396481	0.256363	0.436432	0.0566612	0.334367	1.84399	0.416815	0.519552	0.495529	0.365708	0.610132	0.532312	1.75993	3.64003	0.233274	0.296411	0.694649	1.15807	2.5022	0.789763
LINC00982	8.54788	1.36377	0.265404	0.16801	0	0.0178412	0.0936471	0.134826	0.0211939	0.0121572	0.00748692	0.0697603	0.0223063	0.00390158	0.29895	0.100789	0.0658256	0.0333695	0.273178	0.320126	0.0184317	0.0115979	0.056863	0	0.272659	0.164759	0.0197192	0.0351066	0.0273704	2.44731	0.0270353	0.501397	0	0.0865862	0.147947	0.0033889	0.0447537	0.190103	0.100368	0.238008	0.180652	0.0477218	0.122765	0	0.10213	0.120831	0.248429	0.00894044	0.125854
LINC00926	0.219742	0.855857	0.191414	0.609741	0.369792	0.140694	0.827283	1.01103	0.40112	0.148445	0.457092	1.0397	0.215626	0.244154	0.882157	0.35382	0.270495	0.164549	0.170571	0.103645	0.65508	0.144565	0.458747	0.683911	1.01192	1.11276	0.472959	0.696582	0.78538	0.354002	1.38922	0.0802313	0.200981	1.44356	1.12905	0.118967	0.567807	1.32244	1.76418	1.02798	0.13187	0.918877	1.68639	0.252171	0.550456	0.779346	0.170243	1.20765	0.525966
LINC00909	1.1322	3.46024	1.83752	4.36931	1.58687	3.39978	1.76668	2.76338	3.71727	1.65562	3.29408	5.60679	2.13645	3.00699	3.23908	2.69239	1.53827	3.81068	1.3875	2.75349	2.52586	3.68537	3.61054	3.49013	2.65441	3.89575	1.50502	2.65078	3.6373	2.66306	3.36708	1.97875	2.64623	3.78269	2.83247	5.1223	2.60784	1.46077	4.08456	2.97074	2.67412	3.53239	5.94797	1.76167	3.84011	3.05657	5.58049	3.17766	2.91485
LINC00893	0.745684	0.634646	0.208462	1.3517	0.347127	0.258741	0.529133	1.93101	0.875985	0.170012	0.162867	1.46015	0.181966	0.15156	0.848519	0.422846	0.444532	0.18746	0.135059	0.0854159	0.981931	0.276324	1.28115	1.95716	1.91318	1.37604	0.161955	0.391766	1.55089	0.863685	1.53096	0.138225	0.292294	1.7128	2.10859	0.242226	0.208619	0.380596	2.63614	1.38487	0.0671244	1.18072	4.18471	0.224629	0.843055	1.09623	0.319054	1.285	0.488891
LINC00886	7.98284	0.831739	0.636721	0.8315	0.511737	0.949789	0.316003	0.515341	1.81973	1.01088	0.510098	1.61737	1.22562	2.56104	0.744638	0.53902	0.497077	0.45132	0.6671	0.890721	2.09876	0.875152	0.755792	1.17349	0.954594	1.03804	0.784227	0.397477	1.36885	2.03313	1.316	0.550986	0.45202	1.24426	1.18851	2.12024	1.25819	1.22665	1.05788	0.630682	0.494858	1.32852	4.65428	1.13473	1.01943	0.371218	1.60456	1.23136	0.939573
LINC00861	0.0110472	1.2665	0.285334	0.449278	0.323224	0.293821	0.635777	2.40871	0.481048	0.184355	0.483432	2.31244	0.334621	0.282462	0.879372	0.658195	0.72078	0.251128	0.13363	0.0442897	1.08452	0.508708	0.54439	0.997567	0.530696	2.26472	0.159848	0.571394	1.5049	0.266032	1.66045	0.146369	0.139868	2.9779	1.46239	1.02449	0.900313	0.618758	3.41778	2.13531	0.211317	0.782921	5.30717	0.580886	0.955462	1.03723	0.267848	0.677874	0.436811
LINC00685	0.5171	1.58511	0.228961	2.05171	0.988057	0.350155	3.63874	8.05341	0.610069	1.15323	1.17552	2.25503	0.170251	0.357341	1.72106	2.43967	0.662515	0.100756	0.324935	1.65004	1.17136	0.151748	1.38172	1.47724	3.6426	3.07191	0.442299	0.751645	0.763984	0.654021	3.02638	0.264529	0.689157	1.35077	2.8035	0.57643	0.402574	1.53067	3.77023	3.97548	0.87353	0.86455	2.5098	0.675537	0.835176	1.73397	0.597025	1.81316	1.29383
LINC00667	1.92972	6.5185	3.09611	7.69115	2.19327	4.78126	3.33266	6.94839	5.44186	1.88061	4.26074	6.94716	3.81206	4.32904	5.13914	3.39187	3.61266	3.30191	3.92351	3.55793	5.51288	5.29193	3.47743	7.47906	5.12716	6.47742	2.89799	5.20429	6.50548	3.68627	6.51686	3.47553	5.03909	5.20622	6.12009	6.52471	4.42458	2.29902	4.88709	5.16693	3.57062	4.31723	11.2974	6.59366	6.58541	4.30843	5.32027	8.05339	4.27839
LINC00645	3.54761	0.541085	0.205609	0.0171657	0.0626887	0.00455715	0	0.0269517	0.00649623	0.00465795	0	0	0.00569766	23.5589	0	0.100403	0.0698415	0.00786785	1.22427	0.03469	0.0121062	0.174783	0.0186742	0.00540723	0.0351889	0.0252504	0.0129518	2.86624	0.0950799	0.373841	0.0598482	0.185909	2.4505	0.0561419	0.0234557	0.0259686	0.034294	0.0336169	0.0148859	0.0155219	0.0120374	0.00562591	0.0940728	0	0.00978257	0.00597362	0.326343	0	0.00459239
LINC00641	1.77033	4.53471	1.11456	2.80966	3.13251	1.46268	2.35246	1.31539	1.1339	0.372269	1.06376	3.03985	2.02728	0.48553	2.92544	1.11353	1.25281	1.01615	1.018	1.73952	4.40683	1.21411	0.8915	1.28263	2.13175	2.65979	0.89435	1.51986	5.3532	2.23153	1.38932	1.48185	0.877394	1.57287	3.38929	1.62051	0.80032	1.15349	2.37305	0.952725	0.561835	1.90283	8.38304	0.677925	2.06405	1.7951	1.83814	4.02985	3.91694
LINC00621	0	0.279967	0.277528	0.284219	1.15273	0.523464	0.29704	0.725155	8.12753	0.101224	0.463082	2.6748	0.459898	0.408389	0.227578	0.179828	1.59004	1.18465	0.19693	0.353855	0.338253	3.64195	0.0579741	1.29258	0.163866	0.39195	1.11245	0.151847	0.199678	0.161721	15.8501	0.442486	2.20172	0.808085	0.436909	1.17705	3.38029	14.4544	0.847243	0.289126	0.373702	0.104794	11.974	3.29171	0.12148	0.259632	0.506566	0.255224	0.484741
LINC00571	1.00223	0.73733	0.427987	0.600902	0.536207	0.295594	0.214933	0.499484	0.501632	0.15826	0.301249	0.718727	0.651152	0.849574	0.377373	0.155061	0.215723	0.607547	0.626981	0.137763	0.610754	0.338558	0.17304	0.150315	0.190207	0.272974	0.426721	0.438124	0.449156	2.07279	0.810524	0.133987	0.569901	0.599048	0.62789	0.914402	0.3575	0.467255	0.720336	0.0479433	0.855156	0.330164	4.90334	0.733212	1.01224	0.738043	0.707996	0.317412	0.32625
LINC00515	0.113526	0.4176	0.322545	0.262756	0.442881	0.627806	0.313838	2.23956	0.468778	0.611136	0.338726	0.371308	0.336397	0.117678	0.420785	0.607993	0.178177	0.258071	0.499362	0.455142	0.397092	0.54415	0.775868	0.851334	0.0288555	0.621174	0.254898	0.513392	0.330214	0.20102	0.392612	0.325224	0.1513	0.569189	0.61549	0.408859	0.16873	0.404308	1.07419	1.171	0.197418	0.295254	5.3999	1.09008	0.0641751	0.979696	0.305837	0.853916	0.602535
LINC00513	0.0293475	0.179922	0.353737	0.168194	0.305303	0.216391	0.0983393	0.101569	0.279089	0.042129	0.116751	0.753671	0.476678	0.0135203	0.414386	0.130976	0.482537	0.302435	1.01837	0.112056	0.237239	0.0669845	0.1126	0.256757	0.427672	0.413937	0.253811	0.165895	0.569088	0.235577	0.187373	0.364317	0.156449	0.196187	0.636438	0.0939497	0.571884	0.240706	0.314151	0.12284	0.0136092	0.101768	13.6401	0.10735	0.110599	0.283651	0.210831	0.371781	0.176529
LINC00472	2.99365	1.5651	0.92502	1.70032	0.255887	0.759319	0.452332	0.943914	0.696329	0.395472	0.517539	2.18252	0.952376	1.02169	0.829848	0.545077	0.807102	0.843352	0.794391	0.957214	3.15635	1.0155	0.396373	0.918178	1.01766	2.32472	0.522332	0.664442	2.88771	2.06181	0.703561	0.664251	2.99843	0.980403	1.51018	1.48273	0.332111	0.338932	1.93264	0.205914	0.830384	0.949339	20.5916	0.680207	1.20951	0.722727	0.931826	2.16669	1.05275
LINC00460	0	0.420651	0.0425326	0.0362984	1.30011	0.0144547	0.441434	0	0.0206052	0.0295488	0.0545921	0.319165	0.469879	0	0.096882	0.0244974	0	3.08204	0.261565	0.0943134	0.0127998	0.582579	0.0197441	0	0.0279037	0.0800912	0.794244	0.0310285	0.0532203	0.0874753	0.116819	0	0	1.60268	0.0247995	0.0164738	1.82201	6.20223	0	0.1477	0.0190906	0.053534	3.50605	2.25883	3.10291	0.322109	0.0123228	0.0217302	0.873989
LINC00342	0.531378	2.63581	1.01688	4.7997	1.60185	1.53288	3.01686	5.64257	3.2641	0.396573	0.960888	6.86411	1.75349	1.60236	3.96895	2.44158	3.46052	2.31706	0.867652	0.491092	4.71986	1.31071	3.64027	6.43759	9.89644	5.50665	0.614624	1.49506	6.23714	1.52684	3.81032	0.787081	1.11861	3.13434	11.0107	2.18194	1.29834	3.98036	7.90894	9.06647	0.949252	4.55428	10.5532	2.80516	4.4716	3.23496	1.31765	7.38184	3.55097
LINC00265	4.59284	1.23209	0.277889	1.49677	0.328083	0.459729	1.20399	1.54915	0.655346	0.273196	0.0874875	2.25003	0.437772	0.708421	1.70905	0.416747	0.564382	0.61836	0.409255	0.267408	1.37749	0.726279	0.233658	1.1544	2.99263	2.00673	0.384888	0.912269	1.34166	4.61533	2.51654	0.254424	0.595194	1.89187	2.36623	0.164495	0.744219	0.998988	3.2013	3.0862	0.529512	1.1021	3.43466	0.79824	1.17622	1.82189	0.574217	0.988471	0.624895
LINC00239	2.12759	0.424679	0.383393	0.130879	0.909971	0.364828	0.298434	0	0.260032	0.319627	0.623324	0.719244	0.146614	0.136769	0.209593	0.441644	0.244063	0.494899	0.399007	1.19021	0.0923026	0.304921	0.7119	0.154601	0.251526	0.577559	0.246875	0.307663	0.239866	0.981256	0.842413	0.212617	0.230798	0.758814	0.178836	0.267294	0.661851	0.672811	0.14187	2.57401	0.206501	0.225195	0.739664	0.361978	1.87398	0.34159	0.155511	0.195878	0.577735
LINC00174	1.33447	1.66726	0.653069	2.29254	0.820425	0.591854	1.30477	6.44643	1.76753	1.20082	0.469412	5.72557	0.928671	1.46772	2.12823	1.66006	1.3883	0.791916	0.531376	0.424787	2.2798	0.619433	1.34604	6.83648	6.46099	3.50073	0.493417	0.62571	2.02296	0.988951	3.56947	0.591546	1.10453	1.96535	5.84885	0.225967	0.773865	1.68453	3.43803	5.09515	0.539355	2.46962	8.07125	0.986546	2.96662	5.32211	1.07725	2.83387	1.3032
LINC00173	0.0842099	1.72716	0.561554	4.31319	0.307183	1.04023	0.492525	5.15061	1.09203	0.692344	0.771533	1.63585	1.4266	0.465544	1.42685	1.3393	1.99107	1.75418	0.628575	0.298149	1.87798	0.45081	3.77801	3.75068	3.71263	6.04303	0.420166	1.09052	3.86464	0.563909	6.75321	0.33993	0.642768	0.821835	9.61523	1.0385	0.796464	1.41772	5.32077	4.62799	0.873306	2.23987	5.32676	2.50626	0.848199	2.75884	0.763074	7.67363	1.99092
LINC00115	0.300085	0.706463	0.607664	0.746142	0.387995	0.379312	1.39972	0.897327	0.396522	0.400626	0.302433	0.802637	0.33197	0.481106	0.779647	0.49285	1.22724	0.218292	0.123197	0.192494	0.671769	0.304111	0.639007	1.41022	1.79397	2.01414	0.263521	0.339264	0.907775	0.357075	0.996288	0.171934	0.351942	0.835467	2.40787	0.331428	0.285445	0.683977	2.1201	1.16276	0.217085	1.35798	2.31641	0.351259	0.936386	1.29275	0.312591	1.84375	0.203864
LINC00106	1.70903	1.47341	0.882839	4.6972	0.922687	1.18138	2.79177	6.70962	1.56377	0.258752	0.424933	3.92055	0.351677	0.775043	1.7533	0.953413	1.2693	0.72844	0.469839	0.0611762	5.60422	0.603403	0.653156	3.57113	3.80093	6.66272	0.239828	1.17741	5.38532	3.80163	6.27981	0.267747	1.06766	5.10336	5.26017	0.352629	0.793774	1.07205	8.4836	4.07174	0.185747	3.99335	19.379	0.781432	4.37762	3.31839	1.75051	3.08687	1.3039
LENG8-AS1	1.12737	3.32379	1.19091	2.89828	2.5414	2.78865	2.61041	5.18186	5.61096	0.681896	1.05825	10.3483	2.29379	0.735297	2.78126	1.61683	2.31753	2.47639	1.54153	0.710978	4.79696	1.68268	2.36929	7.10846	9.14382	5.93291	1.30197	1.48937	4.41319	2.13529	5.4186	0.961633	1.13108	4.36346	7.43984	0.684297	1.74461	3.08403	9.10909	4.90819	1.09257	3.92034	7.84988	1.9229	8.12008	3.58547	1.85411	7.44177	1.97656
LAMC1-AS1	0.132013	0.526068	0.375069	0.654735	0.478214	0.208582	1.32707	0.616795	0.59467	0.248728	0	1.43924	0.5433	0.273681	0.97861	0.500791	0.177593	0.270086	0.193559	0.415845	1.04664	0.293781	0.0949695	1.03121	0.603977	0.481551	0.164669	0.410432	0.874634	0.444133	0.491664	0.0945458	0.395859	0.467206	2.68393	0.158479	0.163505	0.256443	0.681332	0.414424	0.0459131	0.557916	6.45862	0.0603611	1.56713	0.683537	0.385276	3.44926	0.350325
KMT2E-AS1	5.92819	6.84746	2.61853	6.5053	1.36462	2.96384	3.49789	10.7491	3.90245	3.65378	5.24084	7.39976	2.58826	2.87953	3.19963	7.45787	3.98751	3.74988	2.07853	1.82066	2.76475	2.72088	13.0414	21.503	17.2736	10.1855	1.97192	3.35108	5.83109	3.2556	6.65106	3.50732	1.25953	4.71301	9.43243	1.0314	2.51132	2.42	10.6667	16.1828	4.33274	6.00512	3.21091	3.37842	5.43954	7.08805	3.33681	8.36709	2.66757
KLF3-AS1	0.510585	1.70158	0.253611	1.83539	0.306441	0.410262	0.407984	0.577705	0.786326	0.278383	0.208332	1.73657	0.63794	0.180943	1.13226	0.309672	0.2407	0.345227	0.422304	0.247441	1.4379	0.454951	0.235457	1.0104	1.10145	0.931247	0.261289	0.425534	1.44283	0.658365	0.741837	0.225031	0.375133	0.467198	1.2303	0.451854	0.295115	0.228887	0.994765	0.604745	0.323284	0.936347	2.17063	0.239445	1.17672	0.980661	0.514345	1.332	0.882457
ITGB2-AS1	0.0389052	1.21644	0.656517	1.49219	0.505916	0.375656	0.879972	7.21714	0.895745	0.23736	3.78338	2.24332	0.200678	0.215083	0.869792	0.677166	0.755995	0.365555	0.370783	0.438221	1.21567	0.461759	3.06939	3.33893	1.57561	6.13082	0.381766	0.513155	0.972372	0.257187	3.10495	0.678011	0.414803	5.83652	3.46859	0.163468	1.34279	0.587813	9.09525	4.61784	0.478096	2.71508	4.2298	0.664121	1.16562	1.81748	0.879239	2.70047	0.51622
IQCH-AS1	2.95646	0.947296	0.441551	0.608726	0.319323	0.531809	0.354092	1.31172	1.25879	0.548629	0.806523	1.30738	0.598414	1.07751	0.656518	0.591082	0.473858	0.896808	0.671397	0.567561	0.952796	0.770206	0.547344	1.7052	0.797418	0.911412	0.604581	0.318582	1.1551	2.27529	0.924557	0.376723	1.15482	1.19675	0.695977	1.3024	0.923727	0.629507	0.859149	0.947809	0.728506	0.485528	3.16578	1.26698	0.546909	0.943529	0.628399	0.840391	0.680496
IPO5P1	2.42576	4.24331	1.23894	2.31022	0.933811	1.7938	0.748619	2.96775	3.09973	0.960956	1.48131	2.79388	2.2175	5.96359	2.43164	2.14566	1.08531	1.42899	1.36487	1.41754	2.03278	1.69851	1.26056	2.28583	2.57761	3.1799	1.35514	0.971934	2.5413	3.47889	1.02551	1.48239	2.86071	2.99087	2.088	1.23583	1.06342	1.3119	2.86378	1.91545	1.49307	1.95103	5.09005	0.90134	1.36816	1.76163	2.05538	2.02902	1.7728
INE1	1.50557	1.25122	0.898721	2.16822	1.95782	1.02202	1.69847	2.70955	0.703325	0.360214	0.199651	2.16424	0.936315	0.878577	1.42906	0.895906	0.825164	0.684503	0.613193	0.728159	3.69804	0.504007	0.288828	1.5681	2.61922	2.41647	0.684433	1.21041	4.70366	1.80097	2.26073	0.239616	0.37901	2.28923	3.02317	0.602471	0.994527	1.03988	3.16573	1.11033	0.674899	2.34938	6.45653	0.979064	1.92912	1.82474	1.14168	2.83445	1.88227
HPN-AS1	0.520386	0.707052	0.232491	1.11608	0.438941	0.251851	0.480708	1.46029	0.612437	0.0151425	0.055952	1.39024	0.407494	0.563715	0.44683	0.288738	0.353184	0.524339	0.103108	0	1.37746	0.317807	0.586842	1.61721	2.47379	2.13425	0.14035	0.333916	0.890918	0.667427	0.942867	0.161165	0.224931	0.564125	2.00796	0.101305	0.390201	0.30964	2.25831	0.681208	0.0782647	0.859593	1.68201	0.437296	0.874557	1.33995	0.341005	0.601332	0.179152
HOXB-AS3	2.14857	0.749809	0.230517	0.295093	0.147373	0.156682	0.498431	1.32133	0.335026	0.142353	0.142459	0.948985	0.0979473	0.411165	0.507575	0.752364	0.481735	0.240453	0.254445	2.52738	0.292903	0.0848773	0.154567	0.289192	0.890583	0.349672	0.164928	0.53253	0.512784	0.959896	0.466055	0.331429	0.418507	0.506934	0.537629	0.0595228	0.163762	0.502988	0.265378	1.36381	0.551822	1.22504	2.65039	0.438305	0.411083	0.75307	0.474929	1.23007	0.491225
HOXB-AS1	0.821352	2.11367	0.45048	2.15918	1.34498	1.45263	2.89495	4.84301	1.82711	0.927974	2.28593	3.71451	1.08837	1.69577	0.923505	2.19939	1.98253	1.18021	0.921796	0.975681	1.53223	0.701279	0.889966	3.99216	6.95891	2.08617	1.50771	2.21256	3.74911	1.2425	3.57156	0.944094	0.783819	2.82312	3.59174	0.937328	1.49705	1.891	3.20985	3.96545	1.18497	2.20207	2.26001	1.98441	4.4252	1.79213	2.13986	4.04642	0.893386
HOTAIRM1	0.211343	6.80239	1.16817	7.21153	1.50762	0.434105	6.74545	5.04697	1.14243	3.2766	1.56945	3.48692	0.90458	4.03093	5.30437	7.05526	1.82909	0.711041	2.02969	1.24675	2.35571	0.933413	1.8853	7.75265	8.48749	4.00884	1.22322	2.89113	4.34414	1.51936	5.26248	2.1342	2.83073	3.62764	12.9477	1.09097	2.95267	3.69494	4.44791	8.87149	1.96991	6.1149	7.55382	1.66211	1.81595	15.2618	1.4993	4.78577	2.28826
HM13-IT1	0.488465	1.19786	0.825802	1.46825	1.93032	0.561297	2.32125	3.04297	1.00016	0.621522	0.294429	1.6783	0.438608	0.675104	1.41078	0.911634	0.955808	0.928693	0.651087	0.152597	2.69227	0.547316	0.191673	1.3875	3.38606	2.00858	0.398815	0.853459	2.41106	1.00646	3.49669	0.381636	1.06526	1.67634	2.80875	0.106617	0.351996	1.84024	3.25951	4.06259	0.370658	0.750679	9.17289	1.21824	2.56042	1.96203	0.478514	4.57067	0.754184
HLA-F-AS1	0.261016	1.13639	0.437723	0.965594	0.560782	0.988191	0.479145	1.57891	1.14739	0.834919	0.642094	1.61667	0.914174	0.496683	0.988155	0.861015	0.705668	0.509077	0.404892	0.814629	1.44666	0.795209	1.25727	1.65478	1.75378	2.32374	0.60776	1.03069	1.37417	0.967231	1.35252	0.682725	0.494069	1.81183	2.33802	0.812882	0.655938	0.837719	2.16062	1.33683	0.778864	1.36752	3.78371	0.567328	1.21461	1.74454	1.17195	1.43766	1.1163
HLA-DQB1-AS1	0.229109	2.21226	2.18951	6.55264	0.893786	1.87031	7.62914	7.73105	1.07506	1.20251	9.91202	5.12051	0.792037	1.54367	5.74216	4.78019	0.46232	5.20817	2.01554	1.60743	36.0887	3.31408	4.20291	4.08046	5.93984	18.4279	1.42893	3.62629	4.70189	1.46046	2.83413	4.22519	1.25953	17.2979	20.3399	3.54116	1.78772	1.63188	27.525	2.15771	1.1554	7.7089	18.993	5.23786	2.42836	3.75657	1.95451	4.03616	3.31356
HIF1A-AS2	0.207616	15.0195	12.7473	10.042	1.686	2.68678	4.74066	0.923843	4.0527	0.606721	1.1406	14.1846	9.12063	0.655875	5.65369	2.48853	6.62341	2.61601	4.47919	3.83907	10.8723	2.23399	2.68846	2.40952	5.06601	7.78974	4.11402	6.70636	10.6592	3.40317	1.92521	1.23202	0.711507	3.49894	13.4537	11.465	2.14532	3.41852	6.12304	0.851285	0.330092	16.1602	62.0735	1.08492	0.201194	1.59714	11.0531	13.8552	7.77637
HID1-AS1	0.0581908	2.14052	0.641277	2.15492	0.389161	1.00115	1.03344	0.201394	0.262129	0.605624	0.102888	0.36655	0.70249	0.0268084	5.20381	1.21195	1.09595	0.194012	0.312841	0.422154	1.33884	0.265637	0.558164	0.557589	0.493022	1.52832	0.445194	2.74117	0.651964	0.590753	0.598572	0.889079	0.0517019	0.251709	0.911404	0.442428	0.153755	0.175839	0.511673	0.139183	0.29683	1.43773	0.42177	0.106428	0.241228	0.4553	1.20186	0.614313	1.13243
HCG27	0.329064	2.38795	0.457921	1.26122	0.823381	0.983263	0.330794	3.87679	1.00838	0.506121	1.3091	1.96217	0.94633	0.29701	0.915054	2.46964	2.37301	0.482409	0.334782	0.176928	2.64965	0.832315	2.6185	7.07563	6.57512	3.66473	0.341777	0.789607	2.04887	0.575538	3.53018	0.798398	0.250603	2.66193	6.2745	1.40278	0.346014	0.365273	3.66625	2.59009	0.579239	2.27927	4.52677	0.429887	0.857953	2.23469	1.1639	5.45542	0.727111
HCG18	1.14605	2.61967	1.42343	1.80266	1.71924	1.79703	1.7207	1.96944	1.1768	0.906159	0.838956	1.7386	1.85411	1.20563	2.14026	1.45079	1.14295	0.642404	1.18741	1.43637	1.94302	1.78415	0.822017	1.60131	1.87655	2.49258	1.18105	1.34705	2.05717	1.48106	2.16589	1.16977	1.48651	2.08495	1.95209	1.42763	0.836198	0.870802	2.15467	1.56483	0.772689	1.80491	12.7687	0.646065	1.8145	1.53223	1.8951	2.73211	1.6156
GSEC	0.263263	0.916334	0.245668	0.252714	0.525345	0.34887	0.802479	0.423236	0.554697	0.269725	0.422308	0.623413	0.33832	0.933109	0.323762	0.367639	0.456981	0.478766	0.174323	0.345334	0.344573	0.308197	0.555953	0.509474	0.436026	0.284998	0.30932	0.571265	0.466589	1.22705	0.790717	0.158135	0.763967	0.400738	0.506461	0.198801	0.39128	0.599388	0.48213	0.921669	0.614346	0.601859	1.70809	0.240747	0.326443	0.363501	0.285977	0.437056	0.437206
GK-AS1	0.339968	0.655052	0.275972	1.57371	1.08266	0.281367	0.6591	0.151278	0.619866	0.104578	0.161009	1.37667	0.399755	0.469867	0.360026	0.563554	0.130671	0.331211	0.106814	0.0278159	2.03853	0.133022	0.0698777	1.15331	1.87636	1.31099	0.266557	0.219631	1.08304	0.584781	2.06721	0.069566	0.58254	1.14589	1.66762	0.757948	0.457162	0.345929	2.31163	0.479175	0.101347	0.757864	3.36614	0.532958	1.40017	1.07294	0.196257	1.99958	0.283543
GATA2-AS1	5.9204	1.37544	1.10887	1.74003	1.20402	0.948198	1.76806	0.474506	0.561459	0.879709	0.404025	1.17768	0.948402	0.124413	2.86475	1.29794	1.01847	0.333706	0.558401	2.41125	1.70511	0.910355	0.587808	1.00391	0.591367	1.19221	0.84301	2.55992	0.854881	4.311	0.501048	1.29931	0.203026	0.473789	0.963562	0.640076	0.384219	0.690493	0.730641	0.273275	0.683951	1.49473	1.91972	0.265954	0.720234	0.458925	1.45504	1.14037	1.39654
GAS6-DT	4.94825	1.83707	0.351417	1.54238	0.261778	1.24547	0.708285	0.470882	0.170246	0.488282	0.279225	0.8123	0.421291	1.56703	2.14411	0.795162	1.09675	0.191464	0.724334	1.24308	0.43813	1.30872	0.279654	0.242927	0.304653	0.709004	0.307102	0.796569	0.664817	3.0516	0.465361	0.394409	0.431732	0.36305	0.395165	0.612502	0.264808	0.262201	0.65019	0.450365	1.08159	0.558158	1.01256	0.118496	0.173966	0.682113	1.07633	0.512976	1.33248
GAS6-AS1	0.130102	1.36542	0.647013	0.484127	0.454703	1.34487	1.74234	4.53326	0.662219	0.382235	0.330431	7.42702	2.16643	1.63356	3.7239	0.419241	1.81153	2.30386	1.93021	0.207124	5.89073	0.578303	2.28118	6.32786	2.83382	2.40669	0.75917	2.1066	1.06473	1.94762	1.29057	0.281112	2.34813	4.43016	6.36815	0.232955	1.47265	1.74485	7.23065	2.13608	0.638083	1.15847	5.3942	0.641256	3.03904	4.902	0.885141	3.6106	1.24058
GARS-DT	0.576857	0.989225	0.344217	1.17991	0.616117	0.501041	0.921044	3.4807	0.793825	0.34018	0.429035	2.87786	0.514929	0.732576	1.27281	0.736094	0.679103	0.439405	0.362341	0.28623	1.04145	0.527447	0.563554	6.00097	5.52057	2.48591	0.344152	0.603141	1.47857	0.692824	3.01352	0.274111	0.89907	1.32125	3.51312	0.538801	0.517693	0.854031	1.92008	1.57568	0.337092	1.44745	12.9044	0.522486	2.3986	2.4028	0.501323	1.71793	0.775276
GABPB1-AS1	0.189566	2.30518	0.244337	0.733887	0.436944	0.369308	0.60499	0.857991	0.968613	0.409181	0.363646	3.48597	1.46882	0.464219	0.762721	0.698996	0.896275	0.599114	0.528905	0.499637	1.69693	0.454941	0.544169	4.78453	2.17338	2.13355	0.423333	0.588847	1.38353	0.876637	2.78783	0.175308	0.781224	1.9736	1.42687	1.06605	0.264422	1.0952	2.93406	1.29255	0.177947	0.822091	16.4628	0.838155	0.913457	2.48656	0.816437	3.74063	0.538221
FTX	0.201087	0.651177	0.316956	0.484168	0.477002	0.282418	0.580516	0.256965	0.22452	0.185967	0.246145	0.674555	0.359889	0.153213	0.735318	0.225511	0.247395	0.166437	0.170098	0.398663	0.495359	0.291271	0.133533	0.409209	0.332878	0.590575	0.228964	0.285633	0.716547	0.598917	0.751665	0.107089	0.175227	0.650841	0.983049	0.442569	0.229899	0.387285	0.57066	0.393097	0.233122	0.636961	25.2888	0.183889	0.545043	0.530384	0.592654	0.779737	0.451533
FOXD2-AS1	0.0693079	3.0748	1.30191	1.49997	0.905948	0.856151	1.83682	1.9364	1.22991	0.569825	0.643355	0.870102	1.12021	0.409285	1.76598	1.88965	2.85365	0.71042	0.859155	1.94145	1.05786	0.621266	2.13944	1.87422	2.1524	1.03886	1.03744	1.45316	0.895984	0.714027	2.33321	1.11007	0.755746	1.53863	1.84463	0.264737	1.16121	1.24843	1.76324	3.68468	2.3053	2.23678	1.48992	1.48656	1.31072	1.56595	1.49371	4.16057	1.81249
FOXC2-AS1	0	0	0.767987	0.131084	0.276181	0.4176	0.348719	3.49883	0.148823	0.0533546	1.31432	0.0720372	0.783169	0	1.01462	0.265402	0.711113	0.811103	0.726605	0.0567654	0.0462236	0	0.641714	0.495499	0.856529	0.433848	0.247262	0.0560265	0.672677	0	0.580067	0.496884	0.0660455	0.175385	0.985138	0.0594917	0.294617	0.705954	0.056837	0	1.37883	0.966633	0.808171	0.815727	1.00849	0.13685	0.445013	2.98202	0.263019
FMR1-IT1	1.52093	0.960702	0.523784	0.853382	0.616455	0.534023	1.06562	1.24418	0.415229	0.148864	0.0611177	2.54587	0.48558	0.700691	1.07378	0.329108	0.86803	0.628625	0.202729	0.422348	1.16071	0.126235	0.0663125	0.748847	1.21832	1.47947	0.229961	0.364744	1.81725	1.10989	1.17704	0.0660167	0.184273	1.79425	1.9157	1.10658	0.228335	1.07437	2.43156	1.07481	0.128236	0.898997	5.63717	0.252883	1.61532	0.572736	0.289713	1.67861	1.07631
FLJ46906	0.388734	2.0178	0.575655	2.0051	0.621045	0.55961	0.872738	1.53373	1.55654	0.976565	0.773239	0.941797	0.503416	0.429813	2.41513	0.69396	1.17374	0.541991	0.645964	0.905408	1.02734	0.65658	1.90165	1.44137	1.94978	1.81505	0.452571	1.06942	0.946448	0.394643	4.01244	0.352648	0.949811	1.77321	2.06071	0.326668	0.667637	0.604112	1.35239	3.88185	0.324478	1.36485	2.7119	1.18496	1.05479	1.28819	0.616708	1.68256	1.16914
FLJ37453	0.775052	2.15199	0.84045	2.40593	0.635418	1.47761	1.48099	2.22129	1.77933	0.799974	1.05326	2.15087	1.28644	0.725934	2.0169	1.42363	1.39021	1.23477	1.72807	1.90033	1.65497	1.57458	2.83854	3.02615	2.59192	2.11223	1.02271	1.89732	1.19655	0.857456	2.05162	1.25697	1.54514	1.47351	1.65534	0.17686	1.0853	0.99543	1.99088	2.56237	1.3723	3.05691	1.82804	1.0075	1.42663	1.57428	1.48401	1.65333	1.76101
FGD5-AS1	41.3344	36.731	14.7855	22.057	19.8113	22.6622	25.8119	11.177	19.5412	15.8027	13.5602	20.3912	18.3989	19.1747	36.2253	13.8355	14.2524	11.8196	15.5669	32.3237	20.4642	21.5671	8.06787	18.9917	12.5892	17.6852	20.507	21.9618	18.479	43.5086	26.123	11.2623	34.2533	20.4812	16.4031	18.9779	19.205	16.9455	20.0356	16.951	28.9532	19.5434	21.4546	13.9071	21.2481	20.4706	19.3724	19.9349	19.0503
FAM160A1-DT	0.220789	0.812161	0.456216	0.525617	0.393751	0.744215	0.0443901	0.458481	1.65763	0	0.0585569	1.54055	0.756006	0.183091	0.498807	0.118245	0.118809	1.20457	0.453215	0.910466	1.48277	0.634968	0.127068	0.16557	0.179581	0.773171	0.352522	0.449307	0.371055	0.781902	0.281932	0.316253	0.411954	0.67721	0.319207	0.265054	0.831319	0.629049	0.354517	1.02978	0.122862	0.631642	2.40043	0.484575	1.44779	0	1.42752	0.769178	1.45307
FAM13A-AS1	0.0911355	1.42261	0.373005	1.10798	1.65655	0.63875	1.46584	4.31631	1.29476	0.286814	0.227762	1.83431	0.750139	0.266449	1.00472	0.572555	1.1883	0.6757	0.282667	0.329239	1.25221	0.405626	0.943093	2.44895	2.63005	4.49051	0.419743	0.523096	1.66075	0.618185	2.08129	0.105436	0.322334	1.58788	4.38987	1.06461	0.61127	1.93378	2.17492	4.03055	0.336469	1.2945	9.80351	0.955218	1.96957	2.03757	0.582316	4.16851	1.19436
ERVK9-11	0.0758201	2.70185	2.01219	3.61626	0.369731	1.72209	1.57678	8.60042	1.25944	1.0306	1.92918	7.2742	2.16867	3.20266	1.94712	2.62246	1.90823	1.67617	2.58468	0.260549	8.61029	1.91444	2.2977	9.06761	3.55561	15.6817	2.1658	0.573247	6.64679	0.677986	1.21021	2.82368	0.745229	3.09145	6.45714	3.5043	1.50252	0.490951	4.35883	1.35162	2.12936	2.34163	8.23034	1.08337	3.07523	2.74808	1.8213	2.89653	2.9024
ERVK13-1	0.841028	1.0723	0.593844	1.72794	0.501136	0.599881	0.93939	1.55971	1.16224	0.203118	0.226795	1.45835	0.47021	0.979615	0.923636	0.734955	0.806457	0.551511	0.421384	0.523089	1.22028	0.64953	0.558102	1.17014	2.56881	1.57703	0.434587	0.466446	2.79903	1.25381	2.13323	0.164158	0.643852	1.17936	2.04565	0.524928	0.508383	0.705561	1.49642	1.47074	0.33359	0.772667	7.7827	0.657846	1.10035	1.64328	0.745737	2.05492	0.786064
EPB41L4A-DT	6.22828	3.58235	2.86638	2.96544	1.00976	2.34986	1.83278	1.36388	0.918202	3.82831	1.86207	3.25932	1.16325	1.48685	2.43043	3.96226	3.50383	1.84316	2.62338	3.8655	2.63008	2.33398	3.11198	3.97708	1.78456	1.9332	2.9042	4.58333	2.10075	3.32055	1.06041	3.42251	2.58074	1.77676	2.06696	1.18272	1.96358	1.51052	1.8183	0.507852	1.59114	4.13792	2.49311	1.51193	1.43392	1.97012	3.44729	2.20565	2.5844
EP300-AS1	0.933981	1.1452	0.393124	1.00651	0.809688	0.801619	1.04322	0.790152	1.61018	0.335189	0.27523	1.35767	1.64003	0.191237	0.805923	0.648404	0.620474	1.35253	0.65935	0.39624	1.32289	1.35013	0.447936	0.389108	1.05509	1.41325	0.51779	0.821272	1.47573	0.808524	0.478523	0.891876	0.368814	0.897779	1.25028	0.872067	0.993983	0.627172	1.15055	0.558481	0.336864	0.719722	5.64128	0.885737	0.156436	0.907494	0.528076	2.68409	1.21173
ENTPD3-AS1	2.55734	0.93612	0.882541	0.741413	0.333245	0.815438	0.423992	1.153	2.413	1.12663	1.82659	0.822649	0.776943	1.39461	0.614391	1.25331	0.751745	0.917525	1.1742	0.911218	1.04079	0.965119	2.24302	1.48803	0.966196	1.8774	0.783173	0.790709	0.859289	0.9983	0.704465	1.04768	1.02461	0.699113	1.18676	0.448649	0.735315	0.808951	0.949107	1.07266	0.824436	1.20107	1.26248	0.732345	0.464776	1.49646	0.786265	1.36115	0.634727
EMX2OS	9.00962	12.4816	8.30508	10.3118	1.13222	18.6786	1.3201	10.2976	14.6555	2.40141	6.10323	6.94812	20.7721	14.896	10.0313	5.66723	7.55004	6.09909	8.89165	9.13001	10.0881	14.6165	10.5503	8.81767	4.06002	12.5369	7.42106	6.26265	10.3179	14.18	0.983694	9.60767	12.5399	6.90473	8.06822	7.49307	3.67098	1.59392	12.7209	2.39427	5.54047	10.4812	7.8982	8.31609	3.3238	1.55346	22.7482	12.4514	9.76522
EGFR-AS1	0.0112676	21.9464	1.36201	0.961195	0.822618	0.13649	2.81473	0.0467957	0.414513	0.133444	4.07911	0.663353	9.21508	0.0622917	0.700036	0.0804591	9.02914	0.445683	2.32117	0.00645337	1.27695	0.65195	2.01027	2.67571	0.303579	1.73449	1.14127	17.6686	0.739242	3.23216	9.75984	0.209814	0.0901006	0.0598161	1.17086	0.0135266	24.5005	0.167809	1.78984	0.0808509	0.203778	0.630046	14.0725	0.0927359	2.42677	1.01126	1.76564	1.01703	0.592045
EBLN3P	22.3923	15.3562	8.64871	10.7458	9.20563	13.4155	7.81222	7.08395	12.2586	6.57387	8.86327	14.9477	14.5812	8.20974	11.3485	5.99419	6.18462	5.92011	6.86459	12.3933	16.4307	14.5431	4.61359	13.3579	8.78621	17.1529	9.76256	9.30977	14.9893	9.84969	10.0418	5.3265	11.9398	12.8385	11.3474	40.078	7.0382	9.34107	14.2855	5.46347	6.87284	11.7324	17.5503	5.14663	16.056	10.03	13.112	16.5846	13.5218
DUBR	0.567542	1.91255	0.854293	1.35707	0.917464	1.90431	1.70025	0.897558	1.68181	0.623181	0.787497	1.26209	0.903355	1.61555	1.55498	0.761552	1.04497	0.915925	0.854184	0.843842	1.34272	1.85559	0.90851	1.33411	0.940047	1.33813	1.35024	1.10906	1.78079	1.39761	0.791903	0.764482	1.41759	0.802551	1.82717	1.28143	0.610762	0.793401	0.931122	0.82257	0.998703	1.29032	3.14648	0.824907	1.2748	0.799204	1.86984	2.41048	0.981461
DNAJC3-DT	3.00939	2.08003	0.558887	1.61845	0.491731	1.50475	0.68107	0.665269	1.15137	0.769016	1.05862	2.24454	1.77413	0.863791	1.32372	0.965703	0.843133	0.75932	1.16279	0.818176	1.2198	0.834328	0.793437	1.73293	1.66599	1.60927	1.01151	0.860965	2.68527	1.92318	1.46423	0.729715	1.09892	1.57993	2.02166	2.93179	0.754568	0.666552	1.39747	0.744291	1.26402	1.11322	3.7115	0.797268	2.13167	1.31256	1.4809	3.05222	1.04252
DM1-AS	0.47718	0.226488	0.492997	1.7508	0.360299	1.00527	0.572532	1.98178	0.808961	0.364599	0.714428	0.604144	0.790605	0.999898	0.804187	0.975508	1.15963	0.405903	1.08333	0.564227	0.961965	0.295123	0.642269	1.19279	3.16129	1.57219	0.307212	0.53948	1.02481	0.83949	1.08106	0.639404	0.369263	0.853474	2.08634	0.16631	0.45756	0.239213	1.05926	0.994064	1.1992	0.940781	1.17147	0.253376	0.539489	0.743882	0.497618	0.950629	0.359467
DLGAP1-AS2	0.712903	1.39982	0.52021	0.481322	0.850177	0.28882	0.561294	1.83236	0.2096	0.16639	0.370214	0.688454	0.472717	0.179145	0.591301	0.32039	0.661721	0.267455	0.35086	0.354054	0.925362	0.324297	0.581003	0.866089	1.10495	0.982008	0.169146	0.366354	1.07951	0.388411	1.7241	0.478439	0.312274	1.10567	1.5226	0.347119	0.266744	0.29053	0.874817	2.49511	0.201129	0.544558	2.10028	0.610902	0.755266	0.839789	0.282038	0.749971	0.338681
DLEU2	0.182775	1.11295	0.470484	0.729296	0.628435	0.440524	1.04636	0.797683	0.721001	0.376891	0.640855	0.918654	0.352903	0.419593	0.754552	0.450718	0.430641	0.323942	0.281615	0.493246	0.927543	0.627887	0.441265	0.967962	1.10867	1.50069	0.553358	0.560374	1.10733	0.362038	0.761487	0.492544	0.602784	0.716298	1.8195	1.34998	0.423595	0.946806	0.987737	0.866925	0.560261	0.749288	11.7292	0.997195	0.907122	0.684386	0.36999	1.35885	0.397894
DICER1-AS1	1.09581	1.23947	0.368601	2.21886	0.388197	0.952938	0.567863	3.034	1.15434	0.589897	1.0476	2.06831	1.14109	0.909879	1.57427	1.13733	1.02848	0.378481	0.647659	0.540034	1.22416	0.657276	2.7194	3.08421	3.72665	2.93131	0.406887	0.739483	1.53192	1.11006	1.15702	0.693548	1.08116	0.79668	3.32358	0.448697	0.820645	0.654554	2.47462	2.14098	0.62042	1.71769	2.02025	0.737973	1.22929	1.48371	0.884861	2.58941	1.30295
DGUOK-AS1	0.164482	1.23248	0.169934	0.966837	0.529629	0.365762	0.771617	1.74572	0.631163	0.118059	0.363526	0.770423	0.373062	0.40414	0.77416	0.783011	0.29503	0.265888	0.160777	0.251212	1.00575	0.350395	0.68367	0.616725	1.33783	1.35998	0.145899	0.144632	1.52388	0.38833	1.01126	0.130889	0.21921	0.905516	1.35414	0.460734	0.217301	0.520692	1.55109	0.786824	0.152548	0.736727	6.01052	0.300829	1.03311	1.36265	0.246172	1.50489	0.659584
DGCR10	0.223554	1.72299	1.08883	1.98519	1.1035	0.908281	0.866817	5.43804	2.49361	2.33812	3.34567	1.20702	1.95575	0	1.39792	2.65107	7.44694	1.04542	0.936513	0.402404	2.77034	0.502965	4.50309	3.6722	3.34438	1.95714	1.01982	1.76919	5.26397	0.520257	3.53431	2.05852	0.425627	4.7471	3.57834	1.03516	1.04425	0.951256	2.16107	2.8072	6.66436	1.07977	3.81936	0.642511	3.50234	3.88047	1.08979	2.78147	0.711904
CTBP1-DT	1.21091	3.24464	2.42273	3.09875	2.10002	3.5071	2.32278	2.71181	3.04152	1.92401	2.57351	4.20514	2.42536	2.31061	3.1784	1.91448	2.28259	3.06057	4.03997	2.34804	3.60148	2.63696	2.36469	2.12487	1.48599	2.82282	2.78187	2.79971	2.0136	3.52228	3.18584	2.20646	2.65916	2.81409	2.45503	1.31049	2.00104	2.12843	2.82399	1.53034	2.59859	3.03361	3.90666	2.27385	2.59406	1.97342	3.01527	2.64738	3.98915
CR936218.1	0.208007	1.02019	0.214902	1.10041	0.69554	0.821636	1.72508	1.61976	0.546581	0.167962	0	1.58742	0.821813	0.215613	1.72552	0.97474	0.886114	0.472847	0.304983	0.238265	1.60065	0.28486	0	1.29987	0.793051	2.27628	0.155678	0.587909	1.5798	0.883961	1.54939	0.148972	0.970261	2.33117	4.69885	0.87398	0.36068	0.269377	2.92243	0.279853	0.43406	1.5553	15.9716	0.380434	1.41101	1.65143	0.607062	2.63508	0.607192
COLCA1	6.52216	1.19413	0.733122	1.92008	0.227997	1.81334	0.469488	0.811941	1.48409	0.142273	0.770553	1.27096	1.59011	0.355266	0.778304	0.384553	0.613674	0.403271	0.501635	0.13478	1.27479	0.770979	0.77354	0.984169	1.51836	1.45534	1.1001	0.397029	2.01253	6.30295	0.317831	0.868619	0.390828	0.19006	1.00432	1.11698	0.712072	0.536842	1.1232	0.587757	0.657279	0.847423	0.708503	0.350942	0.54439	0.707342	2.6025	2.03809	0.480379
COL4A2-AS1	0.29275	0.466642	0.3327	0.967956	1.17469	0.400877	2.11889	0.851076	0.219789	0.157594	0.038821	0.978772	0.59759	0.161843	1.90147	0.47035	0.60387	0.133098	0.128771	0.301803	0.819185	0.14032	0	1.09767	0.625042	0.982452	0.204495	0.430263	0.983983	0.393963	0.623035	0	0.195079	0.483501	1.26973	0	0.261063	0.379124	0.805823	0.157547	0.0814533	1.56081	4.13764	0.107085	0.364075	0.52548	0.262887	0.880799	0.932255
CIRBP-AS1	1.32003	0.741022	1.13375	1.59859	0.602708	0.72035	1.23104	1.25496	0.644774	0.47944	0.421798	1.71077	0.460788	0.747344	0.954395	1.24922	0.870068	1.17137	2.42514	0.728699	0.993901	0.490051	1.09836	0.477055	0.986341	1.18348	0.587211	0.791134	1.03828	0.597014	1.0831	0.797314	0.508697	1.05067	1.1784	0.0381848	0.393959	0.720869	1.33155	1.62619	0.531003	0.909971	4.45239	0.610838	0.395574	0.570944	0.656954	1.51106	0.692157
CH17-340M24.3	5.97445	3.50071	4.26066	3.98578	2.06258	4.06549	4.94288	11.9122	12.1465	7.08698	10.5869	8.72312	5.37889	12.3859	3.34078	6.67772	6.16427	13.0765	6.00786	3.14925	3.47674	4.39866	16.2792	9.71382	5.83233	7.21303	5.51345	3.82554	4.7674	5.37373	4.44459	7.68675	7.6805	5.83181	6.78394	1.39636	7.98906	4.10823	5.09366	13.8947	8.23795	3.81578	3.0178	10.5402	3.82561	5.73066	1.78043	5.56759	5.1352
CFLAR-AS1	0.065656	0.532221	0.14697	0.361811	0.260199	0.276634	0.32634	0.355994	0.52579	0.0510525	0.130598	0.577943	0.170532	0.0604951	0.257518	0.188835	0.235534	0.255385	0.160443	0.129523	0.731483	0.202307	0.104962	0.205148	0.222508	0.505606	0.127397	0.127837	0.808693	0.235097	0.873312	0.120167	0.126392	0.451818	0.711918	0.359064	0.249378	0.363728	0.727918	0.438398	0.0507439	0.275106	25.2314	0.16678	0.927866	0.266928	0.140846	1.79634	0.216824
CD27-AS1	5.61246	6.50666	3.35174	7.22673	5.27939	3.69552	4.56576	8.26695	8.26732	2.41006	7.17831	7.80817	5.40776	6.23246	6.17755	4.44289	3.76163	6.71318	4.36937	4.83097	4.22345	4.89348	9.12875	10.8319	7.87369	7.69552	3.24664	4.77332	8.13329	7.09363	6.6479	3.82374	3.78628	6.18364	7.21972	2.37014	6.16725	4.14135	11.9863	8.663	3.82981	5.92424	6.81488	6.95912	7.82294	10.3475	4.76527	7.73528	6.46429
CCNT2-AS1	0.26058	1.19284	1.11277	1.81508	0.929425	0.713649	0.663607	0.505034	1.40858	0.486289	0.598953	1.16162	1.24687	0.528213	1.10382	0.713279	0.685521	0.537071	0.534893	1.39294	0.874998	0.737506	0.799831	0.499379	0.67116	1.03925	0.537402	0.530281	1.36992	1.02125	1.07217	0.62208	1.18076	0.696788	0.91044	1.50154	0.809009	0.449949	1.51424	0.592099	0.652521	1.76203	4.20234	0.349498	1.98368	0.743578	2.01239	1.48549	1.08797
CCDC18-AS1	0.746494	3.02539	0.969168	1.944	2.83487	1.19687	1.53404	8.03876	5.30194	0.554772	0.60008	4.98873	1.75524	1.5065	2.94061	0.813728	1.73001	0.943086	0.765197	0.885355	3.81419	1.28467	1.70137	6.26263	6.86759	4.62675	0.622971	0.944782	5.00666	1.42943	5.07892	0.738074	1.59357	4.61362	7.00794	1.62577	1.26986	1.42445	7.25468	5.71198	0.441134	2.88641	15.4149	1.14782	3.83521	2.07513	1.39408	4.42501	1.78815
CARD8-AS1	1.80646	7.97395	2.80365	2.89885	2.45199	2.89229	3.24451	2.36743	2.54371	3.25016	3.64117	3.19781	1.90852	2.40792	5.46987	3.90565	2.85141	2.00032	1.68337	2.85096	3.15276	3.51294	1.91757	2.76954	0.971371	3.71356	2.09911	5.86369	2.8906	2.09834	4.08374	2.05852	1.02721	3.76017	2.87286	4.06737	2.79228	1.92354	4.01479	3.83105	1.93229	3.81073	3.31696	1.39499	2.25111	3.32569	2.3792	3.50898	2.90613
CA3-AS1	3.05606	1.44953	0.870548	0.598793	1.21955	1.28498	0.695338	1.67139	2.96479	0.744715	2.13469	0.658134	1.21735	2.39868	1.18978	0.752112	1.83849	1.00633	1.88085	0.648264	1.43113	1.67064	1.59234	2.10627	1.4065	1.04596	2.32175	1.29387	2.30867	1.98639	3.6133	0.936733	1.40792	1.98807	1.56823	1.78153	1.53273	0.651477	1.34143	0.721933	1.95955	0.654163	1.88005	1.88613	0.682492	0.955067	1.2197	1.07541	1.09468
C5orf56	0.696564	1.0985	0.807914	1.13274	0.539573	0.969068	0.900607	1.67843	1.0229	0.575435	2.13497	2.34352	0.506274	0.384481	1.6408	1.38818	1.0628	0.728985	0.517081	0.511856	1.94507	1.43389	1.99812	1.81236	1.35181	2.41306	0.723519	0.948475	1.55603	0.965004	2.64554	0.737325	0.45249	2.31017	2.69974	1.42788	0.857309	1.23114	3.97943	2.28691	0.658218	2.1705	10.2999	0.737147	2.2536	1.67253	1.27659	3.20503	1.1556
C1RL-AS1	0.199746	3.03445	2.87843	8.46744	1.83027	5.77922	2.05491	10.041	3.40049	1.11438	2.07432	5.77325	3.03543	2.68898	3.52186	5.26076	3.4386	2.68196	4.06597	0.255547	8.95996	4.46026	3.82943	5.13242	14.7512	9.54218	1.56873	4.1851	6.69873	1.82265	4.25931	2.44124	0.774425	4.60878	6.36638	2.05848	2.28505	2.04256	11.7016	4.38825	3.57999	6.47679	9.51157	4.92005	6.70742	8.75755	4.51688	8.5813	1.94131
BX322562.1	0.507224	7.4632	3.98851	5.18038	2.41848	3.97744	2.60611	3.33539	8.2086	5.21829	3.06416	10.1177	2.82043	2.84307	3.87943	5.98628	4.54903	5.97018	4.13168	4.61581	2.54955	2.31544	7.86554	7.00864	7.93598	4.35833	2.109	4.52386	2.93252	2.13558	3.89813	8.71844	5.55818	3.62349	7.84247	0.4736	5.22127	5.51047	3.58742	10.7166	7.4092	6.63249	0.765914	3.40153	5.73458	6.41989	3.7704	7.63045	8.10613
BX255925.1	0.196114	3.40833	1.2245	1.16155	0.532222	0.341299	1.38859	0.602009	0.0896228	0.550813	0.180914	0.756079	0.656918	0.129632	2.05879	1.30907	1.59826	0.217091	1.11268	0.957174	0.70784	0.554663	1.50899	1.71577	2.2713	1.51785	0.467985	2.3425	0.903883	0.320082	0.399226	1.53889	0.0454553	0.422477	1.91076	0.112598	0.278805	0.209806	0.616102	0.382395	0.664279	1.86278	0.927028	0.296304	0.192802	0.741715	0.81929	1.29622	1.43911
BNC2-AS1	0	0.452887	1.60272	0.244251	0.823381	0.466873	1.4852	6.28933	2.32935	2.78367	6.36738	3.38255	0.997184	0.102097	0.677993	1.38468	2.1863	0.738879	2.38286	2.53853	0.895745	0.075874	3.98572	5.72429	4.69407	2.10183	1.47433	0.668129	2.17258	0.0261608	2.04379	2.90983	1.23064	3.26799	2.2695	0.753793	2.12266	2.63083	1.05905	4.57181	2.87751	1.92122	3.91529	0.810645	0.375829	1.88697	0.729697	2.1056	0.823347
BHLHE40-AS1	0.395649	0.934578	0.637191	0.523274	0.700404	0.63739	0.596594	1.73983	0.463038	0.444766	1.34252	0.786576	0.819897	0.217121	0.472393	1.98389	0.77751	0.523769	0.631293	1.31296	1.00401	1.4741	0.4102	1.52712	0.627047	1.10365	0.458687	0.39468	0.676957	0.403861	4.64352	0.450041	0.41098	4.10464	1.75599	1.26426	1.98896	1.28096	5.31184	2.93291	0.518039	0.552325	0.632577	0.659774	0.499937	1.83169	0.496361	0.718657	0.679376
BCRP3	0.0344787	0.880752	0.42746	0.744809	0.589266	0.532664	0.335047	9.36727	2.16577	0.129925	0.701065	0.609789	0.764356	0	1.02236	0.918132	1.48942	1.16	0.556087	0.263296	1.072	0.731877	2.30676	1.70935	4.94269	2.21356	0.160563	0.708141	1.71976	0.244206	0.98449	0.609101	0.321657	1.16601	1.9316	0.0689853	0.233448	0.736749	1.58177	1.57719	0.415705	0.403519	1.2339	1.46089	3.57325	0.261836	0.56763	0.764374	0.603882
BACE1-AS	2.676	3.8881	3.14825	4.58254	2.53443	3.34014	4.64931	7.90166	3.94846	4.28001	3.40501	7.66745	3.43253	3.84813	5.12174	6.80674	4.68895	4.92279	4.94419	3.50824	4.01096	1.99123	3.22706	7.96508	8.66532	5.3716	3.11802	3.65493	4.03932	3.15527	4.26309	3.43423	2.51503	4.39774	7.6594	3.89956	2.22236	4.16665	6.17377	6.40979	4.17468	4.00279	7.35749	2.65932	3.32273	5.21129	3.86151	5.56022	4.7452
ATP6V0E2-AS1	3.46817	0.270934	0.307693	0.476478	0.107082	0.161914	0.304216	0.438893	0.793405	0.160323	0.235687	0.565593	0.129685	7.30286	0.230609	0.28727	0.249867	0.353795	0.204249	0.209089	0.277791	0.236821	0.193517	0.438267	0.346748	0.364463	0.201326	0.168352	0.38501	1.15677	0.460035	0.27522	1.12673	0.453341	0.390643	0.121098	0.261777	0.335924	0.815372	0.835846	0.247256	0.249858	0.430853	0.263564	0.304125	0.809168	0.189797	0.197771	0.372222
ATP1A1-AS1	1.00974	1.34849	1.03656	1.38649	0.810048	1.63944	0.562479	1.46908	2.76194	0.581648	0.588475	1.45844	2.1302	1.57333	1.16694	1.03906	0.715236	1.94156	1.16931	1.48814	1.44574	1.44887	1.16595	0.771673	0.68658	1.55777	0.808663	0.952518	1.33445	1.47591	1.51931	1.19759	0.925712	1.09256	1.72018	0.679435	0.650003	1.18272	1.4015	0.57686	0.733676	1.71448	5.64629	1.08218	2.90123	0.808102	2.42567	1.22213	1.41317
ASMTL-AS1	2.28542	2.09081	0.734046	3.82136	0.937112	0.636137	3.45212	9.93423	1.63582	0.446221	0.251246	3.9935	0.374279	1.09653	1.77235	1.93425	0.785887	0.484536	0.538232	0.217027	4.81571	0.535153	3.9868	6.71921	8.53589	9.22651	0.283602	0.977295	4.9752	3.72389	3.566	0.271386	0.820647	4.60995	8.132	0.113725	0.657058	1.01213	8.97723	8.62437	0.477737	4.58877	10.235	0.93128	3.0792	2.81225	1.24414	3.63779	1.87289
ASH1L-AS1	1.21604	1.53914	1.1888	2.21357	0.466378	0.42697	0.617789	0.597352	0.373042	0.802438	1.42183	1.33051	0.75769	1.68068	1.08008	0.746959	0.539437	0.535033	1.18865	1.22818	1.305	0.913249	1.80607	0.898835	1.28952	1.12565	0.456689	1.00523	1.23397	0.861295	1.92012	0.955194	1.34183	1.9436	1.67775	1.25577	0.790316	0.575741	1.94957	1.82958	0.436574	1.66633	2.77211	0.526125	1.33048	1.24575	1.36206	1.28376	0.777265
ASB16-AS1	1.52301	3.26212	1.53366	2.60073	1.70473	2.3827	2.10596	4.56378	2.04565	1.31456	1.89182	3.5871	1.52759	5.178	3.1214	3.33261	1.91919	1.92245	2.14827	1.45013	3.09292	2.19574	2.45944	3.4697	4.05733	4.66951	1.26972	2.18683	2.00627	2.40777	4.81408	2.14471	2.35522	4.16956	4.08792	0.694312	2.01846	2.33022	5.58671	4.70335	1.6986	3.0752	3.35358	2.58571	3.40745	3.38949	2.26211	3.71428	2.44205
ARRDC1-AS1	7.76848	3.67858	2.12111	3.77515	1.7421	2.34395	2.44333	5.17094	1.62093	2.52414	3.1265	3.19619	1.40859	4.19219	2.81943	2.32318	1.85315	1.1502	2.76746	1.75999	2.47712	2.18126	4.12596	5.0078	3.79088	5.20851	1.7183	2.06652	2.44006	2.26564	3.96059	2.26722	2.50669	3.81268	5.52948	0.461129	2.01457	1.60385	5.11952	4.84719	1.87032	3.25537	2.88012	1.57465	2.59818	3.80406	1.86742	5.51633	1.69423
ARMCX5-GPRASP2	0.781386	2.18789	1.04225	1.7661	1.63139	1.49258	1.34238	0.799187	4.14154	0.809884	1.32229	1.56816	1.91605	0.781755	1.43267	0.759917	0.946583	2.20576	0.906286	1.58305	1.67524	2.14018	1.40951	0.940165	0.960438	1.38687	1.43148	1.16688	1.64337	1.49098	1.04245	0.885369	0.901493	1.20385	1.48588	2.49911	1.3578	1.43482	1.11689	0.753157	1.31419	1.14501	3.99405	0.917195	1.93166	1.33655	1.53951	1.579	1.7641
ARHGAP31-AS1	0.278675	0.652332	0.628174	1.34025	0.225902	1.04074	0.534815	0.789116	1.10317	0.245483	0.268761	0.589227	1.08434	0.42017	0.661779	0.22613	0.477138	1.15181	0.520035	0.261176	0.425346	1.11022	0.473858	0.63327	0.437873	1.18289	0.480339	0.343701	1.47379	1.09456	0.431332	0.54432	0.877855	0.537961	0.778322	0.395372	0.426738	0.393705	0.755459	0.636247	0.352442	0.362384	4.33809	0.463349	0.601487	0.384782	1.27399	1.24364	0.537839
ARHGAP27P1-BPTFP1-KPNA2P3	0.166515	2.48835	0.446215	2.40874	0.910597	0.526193	1.63729	4.32221	0.640702	0.30253	0.407123	2.09527	0.486559	0.819871	3.54883	1.01718	0.980034	0.250774	0.518812	0.315909	2.00455	0.869396	1.40754	3.3949	4.81964	3.77351	0.218092	1.28837	2.44526	0.442271	2.10966	0.342861	0.40223	1.90913	3.96844	0.64967	0.53622	0.539109	3.19889	2.85638	0.253369	2.13826	5.65738	0.49489	1.27663	2.16264	0.467279	2.78513	1.23175
AP006623.1	0.0613624	0.460842	0.348681	1.70428	0.324878	0.517087	0.994673	1.11495	0.610419	0.214713	0.111886	3.7129	0.616193	0.243825	1.40255	0.561408	0.570965	0.571913	0.371129	0.114219	1.42374	0.262608	0.38626	1.11205	1.9652	1.71234	0.260243	0.320854	1.19982	0.662792	0.816203	0.230722	0.347564	0.796284	2.03767	0.0828727	0.577607	1.00327	1.90019	0.963169	0.426829	1.33656	5.94168	0.322658	2.80102	0.8049	0.433937	1.87051	0.561796
AP006621.4	0.0594304	0.182177	0.276302	1.17901	0.231847	0.438206	0.328587	2.77674	0.490807	0.0639855	0	2.59171	0.234804	0.246415	1.32167	0.397853	0.586301	1.40503	0.174276	0.136152	1.77388	0.529026	0.171016	2.82258	1.29909	4.29241	0.177917	0.571112	0.633841	0.547214	0.600783	0.12769	0.31682	2.69924	1.82584	0.0356727	0.206103	0.46179	3.9193	2.50535	0.165356	2.00934	3.79602	0.597825	0.201572	1.60014	0.613733	2.21158	0.315425
AP006621.3	1.79133	1.66563	1.20296	2.96145	0.881849	2.0913	1.18549	8.77252	4.46054	2.55543	3.70175	8.11564	1.94628	1.46484	1.83379	1.86541	3.02567	1.98176	1.96986	1.14565	3.64804	1.17549	2.92101	7.94799	5.64587	4.53049	0.998062	1.58641	3.57013	1.93486	3.08164	2.11684	1.83032	2.78243	8.74066	0.501775	1.89326	1.41124	4.33158	5.3557	2.80356	2.23235	2.67788	1.69273	2.61594	3.79252	1.70244	3.02574	1.06166
AP006621.2	0.946283	0.477764	0.402562	2.65029	0.310217	0.762231	0.839347	3.81443	2.50745	0.23972	0.369073	8.41516	0.696419	0.461595	0.943167	0.794959	0.848672	0.556761	0.16323	0.255045	3.11521	0.495496	0.400443	4.80037	2.82967	4.14218	0.166641	0.755174	1.47518	1.37989	1.8362	0	0.964404	2.561	8.85237	0.801881	0.882468	0.504608	3.89434	3.09546	0.464628	1.52006	11.9523	0.81445	1.88797	1.4603	0.699799	2.90879	1.18173
AP006284.1	0.372657	3.74365	0.560629	8.09336	1.98939	0.819506	0.854389	18.3957	3.93657	1.23181	0.511513	6.84264	0.555352	0.424688	2.64481	3.62392	2.15189	0.826329	0.42178	0.651535	4.45775	0.819238	6.96089	13.0249	28.549	8.3279	0.508882	1.92916	4.7753	0.986322	7.22828	0.608702	0.914886	4.43481	9.46392	0.345337	0.80975	1.27002	8.83305	11.3176	1.20058	7.26044	5.7397	0.968549	1.65571	12.6651	1.39728	10.6738	1.63781
AP005899.1	0.203418	0.249421	0.390299	0.960839	0.680197	0.27549	0.964015	0.72413	1.0036	0.125148	0.154142	1.6897	0.688872	0.24098	0.800132	0.3372	0.703679	0.607748	0.340863	0.532593	1.59922	0.179085	0.125433	0.944318	0.531811	1.95046	0.318987	0.0985613	1.52147	0.473396	0.680299	0.124873	0.34856	0.891328	2.36324	0.558172	0.316731	0.752672	1.66645	0.677683	0.202136	0.566831	11.8477	0.212595	1.44559	0.56174	0.391432	2.9911	1.01794
AP004609.3	1.14116	1.02885	0.979605	2.04196	0.308637	1.42301	0.986901	3.58939	2.19229	1.37317	3.10445	1.51247	0.712761	0.185553	1.23812	1.27324	1.36962	1.06817	1.46405	0.701643	0.579169	1.32723	3.30795	1.84576	1.74887	1.34676	0.879199	0.996076	1.47525	0.748833	1.13396	1.79083	0.615058	0.811701	1.48607	0.443219	0.673444	0.880195	1.11635	1.61059	4.93778	1.88767	1.09472	1.15099	0.958147	0.776248	1.99677	1.36859	1.69231
AP004608.1	2.10652	0.112709	0.225549	0.714236	0.012807	0	0.762337	0.0159066	0.00575099	0.010309	0.00253947	0.011135	0.0428743	2.15974	0.270401	0.521345	0.0120224	0.00696526	0.817081	0.0087744	3.69571	0.00393387	0.0137766	0.12446	0.11682	0.262657	0.0515971	0.941794	2.09688	4.74187	0.0163023	0.628154	0.0127611	0.194287	0.0795987	0.103453	0.0436423	0.00496007	0.107622	0.0515296	0	0.662408	0.629812	0	0.00866033	0.0290859	0.997412	0.0151625	0.00609834
AP003419.3	0.0611547	0.749849	0.252728	0.768374	0.477147	0.22546	0.184429	0.825443	0.505047	0.197526	0.729866	1.15566	0.201347	0.126782	0.410165	0.846085	0.493619	0.166823	0.179332	0.105076	0.570419	0.1675	1.67179	1.18472	1.52331	1.16001	0.152566	0.207417	0.533644	0.303202	0.390451	0.0875966	0.326012	0.541083	0.828888	0.146831	0.212082	0.752381	0.771532	1.481	0.510462	1.03382	2.82573	0.447396	1.14081	0.337758	0.0549165	1.25893	0.259661
AP003392.1	0.725438	3.59504	0.624571	3.31807	1.04442	1.14621	1.70159	1.56918	1.86085	0.227803	0.200415	6.94229	1.73162	0.41776	3.17966	0.539599	1.54519	0.74209	0.7091	0.276989	4.79294	1.13835	0.0869797	1.47335	1.04487	2.16108	0.271469	1.2644	3.2042	2.03384	3.40942	0.129887	1.12795	1.88989	3.49601	0.471725	0.688848	1.01776	4.71476	1.40979	0.462555	1.41502	13.5558	1.16094	1.98206	1.54421	1.24859	6.70106	2.1818
AP003352.1	0.413294	1.39359	0.97716	1.15629	1.41742	0.485573	1.00671	3.11933	0.871201	0.419299	1.80228	0.970492	0.675134	0.900756	0.785577	1.46142	0.876758	0.484211	0.536059	0.892207	1.14167	0.571439	2.52724	3.86419	3.74136	2.11064	0.483809	0.611024	1.82891	0.478497	1.4716	0.591993	0.328368	1.44394	4.03614	1.79378	0.36226	0.771971	1.8049	4.27729	1.58115	3.51403	3.02438	0.814041	1.05134	1.53638	0.792231	2.68078	1.09677
AP003068.2	4.35153	1.81823	1.1399	1.92618	1.10189	3.91425	1.08251	2.14449	2.75675	0.218572	2.21221	3.48996	1.19731	1.17113	0.934741	1.07149	0.316646	1.97439	1.21653	2.50744	1.46548	1.52307	2.67964	3.51916	1.08586	0.51516	1.42691	2.08562	2.52747	2.3694	1.57794	2.76883	2.50564	0.478989	0.78162	2.808	1.41683	0.994485	2.27776	0.554185	1.44897	1.22814	1.53542	0.387444	1.75634	0.877492	2.21935	0.726816	1.56469
AP002907.1	0.143714	0.894627	0.308376	0.394764	0.394301	0.139735	1.0224	1.1478	0.514583	0.0833153	0.102618	0.835631	0.240222	0.168068	0.694624	0.335495	0.247864	0.120626	0.0972533	0.0886414	1.00021	0.143825	0.0636229	0.635573	0.719329	1.43559	0.353015	0.21247	1.07899	0.344518	1.01167	0.0158348	0.353598	0.717282	2.35744	0.809545	0.240981	0.50108	1.29326	0.456115	0.0768965	0.531896	4.44701	0.222408	0.712411	1.06848	0.148908	2.48582	0.445918
AP002807.1	0.0523027	0.513048	0.202637	1.0549	0.451804	0.316784	0.933256	2.55232	0.490844	0.126701	0.0866971	1.34952	0.223863	0.253005	1.13547	0.630246	0.445622	0.166455	0.191718	0.149778	1.17085	0.447671	0.545583	2.01012	1.80799	1.69801	0.104386	0.68001	0.929704	0.185225	1.64184	0.0749172	0.139411	1.97445	2.17399	0.0941829	0.3239	0.778944	3.40425	2.46289	0.181906	0.935185	2.73657	0.310892	0.473059	0.6319	0.270063	1.61505	0.471911
AP001830.1	0.365514	1.31652	1.2037	1.60132	0.407407	1.51599	0.826733	5.02845	2.19535	1.37735	2.27204	3.85211	1.82018	0.947204	0.903187	4.28209	1.61857	2.05647	1.00486	2.59062	1.74728	0.625705	3.51696	1.94154	2.43875	1.36664	0.615512	1.44632	2.95326	1.34297	3.16019	0.785332	0.334904	0.862397	3.42663	1.7826	1.06387	1.27215	2.14847	1.96706	1.90685	2.34683	1.05557	1.00276	0.67152	1.82948	1.35395	2.17051	1.67321
AP001767.3	0.072516	0.622409	0.14984	0.239769	0.242482	0.420115	0.0364487	1.88229	0.925534	0.351333	1.05778	0.527061	0.477506	0	0.460767	1.10036	0.617841	0.164846	0.74427	0.49839	0.270557	0.422064	0.678182	1.26886	1.43768	1.16389	0.18091	0.163967	0.65622	0.0770424	0.733066	0.155806	0.0966446	1.15489	1.0484	1.04465	0.287409	0.469557	1.3723	1.2358	0.453971	0.754388	1.971	0.530514	0.491911	0.700887	0.488392	1.89472	0.461851
AP001625.2	0.0824791	1.85408	0.937345	2.10897	0.367729	2.78013	0.359289	1.08473	0.825643	0.503204	0.145832	2.07818	0.923288	0.873953	1.35871	0.39264	1.25751	0.749977	1.93492	0.535372	1.89766	0.602418	1.42405	1.06522	2.12437	1.60461	0.685884	0.99464	1.1018	1.61624	0.672877	1.37831	0.109923	0.681106	2.63332	0.33005	0.217931	0.284837	0.914433	0.739786	0.726705	1.50156	3.6616	0.703968	0.994658	0.721261	0.888788	1.30608	2.45142
AP001542.3	2.63975	6.87805	6.75615	5.79231	1.97268	16.557	1.38713	6.54053	14.5937	4.97362	5.17123	6.80239	9.40224	2.36316	4.80741	5.51569	3.60499	7.28274	13.1947	2.40526	8.53383	13.9468	16.7891	6.97343	3.2938	17.245	6.52566	4.91747	11.4786	7.66994	2.23441	15.9838	11.2739	7.43142	9.32423	8.03047	2.64531	2.17546	5.40146	1.4529	4.96602	6.35826	14.6759	7.07737	6.68109	3.93477	21.7383	2.75508	5.89072
AP001528.2	0.493204	4.99708	3.56687	3.87945	1.15733	4.4022	1.87881	1.40149	1.32523	3.26988	5.09455	13.4143	2.86307	1.30949	7.17481	3.0121	4.00425	3.02125	3.17803	1.15964	3.57133	2.13294	6.49862	2.10882	1.66267	2.51873	1.81326	3.82981	4.88263	3.23587	1.89212	2.75145	4.48009	1.95986	2.39248	4.97039	1.60753	3.42892	1.6821	0.954595	3.53901	3.35867	16.0159	2.6824	9.47931	2.72397	4.88349	2.05527	2.28701
AP001505.1	1.71288	1.79397	2.13835	2.97335	2.2274	1.91703	1.36316	5.77996	1.5539	6.10881	5.34731	2.38617	1.90334	1.92349	1.96511	3.24892	2.81636	2.14158	4.0288	3.18834	1.16498	2.05254	4.67226	7.9835	2.57596	3.01996	0.783425	2.21893	1.63769	1.33958	2.12648	3.01576	0.998734	2.52587	1.54776	0.856788	1.76792	2.81904	2.41474	8.00182	4.7162	1.94898	0.969927	5.54764	2.38035	2.85779	2.33928	3.05145	1.74245
AP001453.2	1.19159	0.324683	0.35565	0.420258	0.914959	0.195247	0.798575	1.31969	2.18685	0.456151	1.33435	0.846829	0.55797	3.54998	0.243033	0.425443	0.546214	1.15574	1.82479	0.545975	0.197593	0.308241	1.10488	0.926675	0.323066	0.540918	2.24607	0.299371	0.56483	1.44415	1.23981	0.682725	1.37634	1.28077	0.478543	0.0317887	4.51285	3.94365	0.364442	1.66256	1.03147	0.516509	0.50381	1.98565	0.598753	1.3528	0.0951151	0.461249	0.140541
AP001189.3	1.09275	7.80107	9.7092	6.58389	3.54572	2.96714	10.8385	1.00852	0.911568	1.98699	0.54743	3.49463	5.85242	0.536991	16.304	2.62269	5.13973	0.772826	2.74157	3.3101	3.28429	3.27567	0.59396	2.88328	1.28383	2.12592	3.61064	9.25194	3.29622	3.90427	2.17057	3.89569	0.258907	3.78143	1.71151	0.991163	2.33393	1.35227	3.75989	1.00191	9.99961	6.03134	2.83812	0.621785	1.97671	5.86764	10.0309	3.19164	12.579
AP001189.1	0.465608	1.83505	2.29068	3.04967	0.951449	0.607219	4.19022	0.575512	0.149814	0.525165	0.0588033	1.36977	1.56217	0.168539	6.80136	1.2369	1.06383	0.252008	0.959007	0.97779	2.06807	0.797049	0.0638014	1.26086	2.40073	2.96012	0.9182	2.01786	1.42597	1.79809	0.672406	0.698685	0.0886474	0.993933	2.90498	0.585572	0.560206	0.516842	2.58106	0.636375	1.24922	2.24888	2.50093	0.0811024	0.75201	1.95928	2.9467	3.30031	4.63643
AP001160.1	0.619941	0.481422	0.341595	0.573941	0.43763	0.130602	0.498561	1.8881	0.620581	0.244734	0.548062	1.47191	0.20411	0.114242	0.539804	0.75625	0.77839	0.281854	0.212093	0.260379	0.655348	0.212249	1.18929	1.52382	2.50017	1.53775	0.103107	0.256989	1.21551	0.336637	1.01151	0.266397	0.192784	0.560699	2.61416	0.0496153	0.245707	0.428187	1.11393	1.37159	0.431223	0.591184	1.79734	0.377948	0.60744	1.02718	0.148454	2.02884	0.570321
AP001107.4	0.351952	1.47445	0.333317	1.90071	0.326908	0.247151	0.648638	1.27898	1.27714	0.0947317	0.583396	2.25961	0.309006	0.162143	0.973206	0.602118	0.368255	0.266689	0.172013	0.302363	0.848062	0.34141	1.18157	0.953078	1.81897	1.28384	0.146339	0.265268	1.89579	0.851707	0.998705	0.168043	0.273617	0.761197	2.8092	0.0704187	0.116243	0.455792	2.11921	2.52543	0.122407	1.02976	2.79012	0.160926	1.02793	0.850427	0.289713	1.81131	0.684922
AP001094.2	0.0204862	0.870796	0.317479	0.261913	0.395792	0.179825	0.707058	2.3681	0.933083	0.183803	0.0543327	1.58824	0.67449	0.386956	0.930469	0.560763	0.55119	0.769954	0.270335	0.234663	1.28663	0.36472	0.108077	1.29729	1.35384	0.896745	0.258947	0.28565	0.86072	0.386932	0.813847	0.136938	0.482346	0.491408	1.69069	0.524658	0.331545	0.530609	1.40192	1.23724	0.465498	0.754795	7.77689	0.749365	1.61357	0.77316	0.25755	1.50308	0.645128
AP001062.1	0.163386	1.01949	0.663954	1.66629	0.343989	0.780195	0.68983	1.56069	0.348917	0.500362	0.553695	2.20087	0.363405	1.80652	0.817707	0.878261	0.38424	0.406079	0.862414	0.390943	1.39867	0.551925	0.689565	0.707913	1.00038	0.95359	0.456521	0.673193	0.518659	0.604331	0.703168	1.14935	1.3065	0.968017	1.16796	0.200501	0.284208	0.352653	1.42416	1.0877	0.333371	0.840413	0.927646	0.398433	0.767617	0.827184	1.04334	1.19589	0.724564
AP001033.2	1.81254	0.734373	0.586212	0.500288	0.386488	0.282234	0.522856	1.11279	0.496991	0.4412	0.334411	1.53505	0.259462	0.457453	0.6899	0.407981	0.763312	0.343957	0.36975	0.433296	0.940879	0.248223	0.385512	0.630366	0.592904	1.44883	0.377476	0.69494	1.29384	0.703291	0.72118	0.316064	0.336088	0.873897	2.30717	3.48148	0.421658	0.469463	0.831532	0.819935	0.438532	0.36892	12.4662	0.807142	1.05134	0.261148	0.608599	1.84692	0.384799
AP000894.4	2.48746	1.32434	0.845369	1.29862	0.218886	1.24113	0.197412	3.1264	1.81838	1.97335	0.954853	1.23701	0.883633	1.13089	0.901183	1.08093	1.02738	0.476176	1.10375	0.37491	1.00744	1.32227	2.02493	2.33169	0.93174	2.38781	0.391934	0.333027	2.07328	1.80818	1.01001	0.65634	0.959643	1.04251	1.83362	1.33591	0.648605	0.169546	0.638151	1.29169	1.13832	0.723541	2.13504	1.0775	1.0361	0.587493	1.6753	1.29572	0.486394
AP000873.2	0.693541	0.428438	0.399288	0.833233	0.306851	0.46286	0.409798	1.71502	1.6376	0.170999	0.575685	1.83931	0.557783	0.614636	0.579345	0.46783	0.546031	0.587306	0.271686	0.206188	0.987631	0.529272	0.464654	0.880047	0.915046	0.888353	0.285287	0.251387	1.42016	0.592465	1.34643	0.219916	0.282231	0.911856	1.13855	0.603783	0.393431	0.397661	1.59694	0.59832	0.338798	0.874329	6.66245	0.280803	0.820016	0.789479	0.494433	1.63479	0.522637
AP000766.1	0.706418	0.80999	0.583868	0.72723	0.536271	1.23481	0.621847	0.642272	0.928848	0.661894	0.794987	1.26556	0.915242	0.786347	1.17	0.650992	0.914367	0.55901	0.722235	0.765442	0.933159	0.92036	0.379086	1.02131	0.869624	1.39846	1.07836	1.0663	1.5673	1.3063	0.507909	0.596175	0.641216	0.891924	1.79419	3.50219	0.438889	0.860446	1.0029	0.424692	1.12087	0.8342	5.19972	0.691398	1.19583	1.0492	1.05612	1.38469	1.02143
AP000759.1	4.45983	2.88068	2.96207	6.53041	4.30522	3.10386	3.92287	2.56333	5.14207	1.58626	1.63694	6.30933	3.17271	1.59601	4.72296	2.31029	1.92847	4.41737	5.07946	3.46655	2.97135	3.38101	0.973975	2.18981	1.94328	2.67267	2.50339	4.68195	4.06672	4.34336	2.92371	4.10667	4.08634	3.57015	2.23083	0.860457	5.08975	4.899	3.97329	2.21439	4.7641	3.31399	5.73625	4.07841	3.42149	4.39851	3.86186	3.59419	5.74851
AP000757.2	40.2166	4.2108	3.40139	11.7865	0.253075	0.687597	0.570615	5.24528	6.26458	1.74174	11.2909	5.28083	2.76593	9.96338	3.40635	2.02664	2.11267	1.39358	1.29002	0.0650204	2.40902	1.53528	13.5981	10.5707	10.5034	4.59669	1.27449	0.962609	4.10933	15.0162	1.20804	1.58547	3.85815	3.81692	15.4385	1.05622	0.506191	1.91127	9.04923	4.32759	1.73728	3.2847	6.47988	1.81679	2.95205	6.46599	1.07043	6.33696	3.8261
AP000757.1	34.4677	1.15189	0.635898	0.742629	0.108322	0.409471	0.227954	0.493305	0.194567	0.244141	0.415258	0.486595	0.462176	3.2236	1.15115	0.23132	0.639164	0.284742	0.918282	0.556604	0.795684	0.37709	0.341799	0.337398	1.30644	0.582959	0.226286	0.317407	1.02602	10.2332	0.252789	0.355742	0.489296	0.45859	1.07329	0.116667	0.0962939	0.293666	0.730689	0.542375	0.120177	0.89867	1.43813	0.0592479	0.170914	0.849846	0.93088	0.359083	0.653343
AP000692.1	0.344816	0.975684	0.38365	0.701606	0.709544	0.39115	1.14654	1.26682	0.677069	0.171344	0.316561	1.04103	0.436645	0.256614	0.917583	0.35513	0.570919	0.120592	0.233343	0.0607657	1.18754	0.308758	0	0.762475	0.835986	1.04495	0.264687	0.089962	0.805805	0.488453	0.959641	0.113978	0.494898	0.938724	2.20499	0.445788	0.394223	0.549602	1.85569	1.14195	0.2583	0.827801	5.47911	0.242559	0.659733	0.659223	0.142912	1.9741	0.0844661
AP000442.2	1.39364	1.22423	0.472784	0.605227	0.625986	0.350564	0.648212	2.0301	0.874529	0.380713	0.24825	1.26994	0.698541	0.632466	0.822375	0.63126	1.08199	0.453933	0.457474	0.381225	1.43573	0.484262	1.04748	1.58584	1.50151	1.69962	0.684982	0.51736	1.76131	1.09022	1.46085	0.655476	0.942539	0.981543	2.06749	0.524388	0.577087	0.404066	1.55068	0.671647	0.347248	0.676219	2.48761	1.02717	0.846604	1.1201	0.466971	2.66802	0.463674
AP000355.1	0.0658687	1.93836	0.374287	3.13618	0.110127	1.45703	0.893905	0.82068	3.8573	0.319127	0.174695	8.71319	2.29879	1.229	2.32517	0.999495	0.443057	2.57544	0.193156	0	4.7308	1.05992	0.236929	2.26394	1.17195	6.63155	0.953093	1.56384	4.02345	0.419881	0.911188	0.613268	0.0877855	1.24329	3.45209	0.513983	0.652658	0.89568	1.47314	0.11816	0.320722	2.26984	8.32501	0.843295	3.68626	0.545691	1.30129	4.01575	1.32846
AP000345.2	0.102368	1.11173	0.377718	1.06377	0.195601	0.308082	0.529231	4.40328	0.0658757	0.236172	0.60117	0.233838	0.288889	1.17228	1.23894	1.13563	0.327887	0.265949	0.600373	0.100508	0.954832	0.310421	0.757472	2.54058	6.51227	2.36851	0.0583731	0.545597	1.93779	0.0725049	0.342352	1.19398	0.175409	0.759084	1.47999	0.122891	0.0434703	0.151509	1.12375	0.44597	0.305167	1.46429	0.357733	0.0802396	0.380271	1.55479	0.196983	1.22735	1.05558
AP000254.1	0.516816	4.0631	2.35565	1.72892	1.79592	1.92136	3.27001	4.04027	2.69326	2.8476	4.63613	4.19824	1.3012	2.01682	2.44679	4.3417	3.46266	1.93504	2.71904	2.85552	2.43865	1.51962	4.724	5.66144	5.87265	4.96812	1.51686	2.47465	3.43885	1.80872	2.23214	2.09019	1.05343	3.65814	5.65886	7.51815	1.77724	2.79531	4.39328	4.09016	2.49529	2.92543	4.04889	3.89213	2.61217	3.31612	1.41959	5.10293	2.58163
ANKRD10-IT1	2.25271	6.68734	4.20563	7.86658	8.61194	4.49599	12.8524	9.39679	5.1035	1.89349	1.67707	11.7772	4.84048	4.23321	11.7328	2.29296	7.03574	3.52177	2.63658	3.91589	12.6257	2.90914	1.5353	9.28628	11.311	13.1766	3.31282	4.78088	12.7729	3.93289	11.7754	0.679312	4.92477	9.72096	18.2842	15.0637	4.03343	6.55126	15.0714	10.209	2.52913	11.0494	63.9683	4.58994	12.0641	12.6873	5.18151	23.4687	8.28542
ALOX12-AS1	0.368554	1.04841	0.746311	1.47531	0.712044	1.00936	0.844722	1.44901	1.97749	0.513196	0.938366	1.79296	1.28785	2.34992	1.3565	0.921109	0.982796	1.5371	0.785352	0.557261	1.5905	1.282	1.08176	1.63371	1.70867	1.88574	0.833636	0.794454	1.65487	1.19034	1.37525	1.09805	0.66801	1.74493	1.94486	0.572226	0.701146	0.999133	3.08289	1.25176	0.868211	1.53363	4.35421	1.35712	1.25559	1.70984	1.27529	2.2333	0.672893
ALG13-AS1	0.162138	0.298209	0.837566	1.17942	1.08433	0.683151	1.14094	0.841724	1.09556	0.349131	0.215009	2.12122	0.854123	0.896362	0.858524	0.289446	0.727068	0.368578	0	0.557174	1.81481	0.333067	0	0.810586	1.15392	2.48406	0.323597	0.549921	1.25764	0.574197	2.07039	0	0.432175	1.14765	1.46508	1.55716	0.56229	0.734917	1.39469	1.45428	0.338344	1.15963	18.2888	0.148272	2.38304	1.56711	0.291198	3.20939	1.29081
AL928654.2	0.923643	3.31045	1.39469	3.24189	1.1087	0.748396	3.60687	2.58192	1.49358	0.497217	0.141326	4.85417	1.33337	0.540083	3.10998	1.93425	1.43371	0.452233	0.416696	0.895235	4.70525	0.291902	1.94229	2.84161	6.50124	5.59811	0.248151	1.12456	2.29624	1.50969	2.83516	0.610617	1.94114	3.31078	8.9238	0.426468	0.598392	1.33418	5.41893	2.99516	0.197684	3.55707	6.37275	0.584757	1.56638	2.35444	1.46744	6.80679	2.63964
AL731571.1	0.0844595	0.496374	0.667985	0.743408	0.519391	0.349725	1.61903	0.816447	0.341102	0.197544	0.050207	0.774745	0.657793	0.152958	0.892371	0.366541	0.564187	0.143004	0.140917	0.410336	0.584054	0.205406	0.0754262	0.851765	0.71361	1.18136	0.290629	0.497188	0.986438	0.3548	0.27582	0.229441	0.205717	0.769611	1.69477	0.111881	0.167373	0.392255	1.08893	0.517223	0.287668	0.958168	2.89724	0.191759	0.79354	0.631344	0.426296	2.45813	0.448265
AL731567.1	0.0342175	0.335646	0.459573	0.497806	1.0679	0.216257	0.240782	2.3448	0.565172	0.0736802	0.181501	0.447659	0.13519	0.378335	0.676413	0.0916267	0.73651	0.311138	0.301022	0.391952	0.861741	0.398311	0.393856	1.49682	0.313101	0.948613	0.23902	0.386849	0.464468	0.121178	4.51498	0.0980248	0.364823	6.78157	1.23675	0.0410776	0.23733	0.177253	3.57126	1.84146	0	0.889916	4.46418	0.438076	0.154743	4.25213	0.399452	1.35461	0.617467
AL731533.2	0.328204	4.76206	4.4646	6.33023	1.49377	6.04997	1.53967	6.24739	5.46203	2.76798	7.79779	4.85042	4.70054	0.189004	3.24397	5.17548	5.24923	6.04328	2.80711	6.7984	3.75011	3.89539	14.5601	4.1362	6.56248	7.06355	1.99239	2.59738	7.49577	1.64659	3.89989	6.11146	1.16642	2.74255	5.83242	4.56388	2.2764	2.90443	4.76802	8.83135	3.69076	7.61109	4.31164	4.05182	5.72052	3.24771	5.99274	4.59087	7.89675
AL691432.2	2.62182	4.18488	2.94114	6.42214	1.23636	3.37448	2.51864	3.96246	1.7471	1.91247	1.36807	4.39752	2.8961	4.1918	3.41177	2.5687	2.33746	2.89184	4.48106	3.18981	3.55972	2.72476	3.74994	3.25746	4.06939	3.8142	1.62553	2.6835	3.57991	2.65911	3.70611	3.47767	2.77054	2.52562	2.74756	1.60166	2.30576	1.84837	3.36287	3.9379	3.07548	5.14431	2.9095	2.41178	2.35029	2.64545	4.15151	3.53757	2.6019
AL683813.1	0.628568	0.674379	0.183998	0.478013	0.262729	0.2207	0.716124	1.08771	0.330339	0.157907	0.131976	1.10407	0.327672	0.419891	0.584297	0.25715	0.291261	0.276251	0.107522	0.102001	0.688898	0.290524	0.504946	0.792155	1.15032	0.924791	0.182948	0.248722	0.93109	0.545373	0.76362	0.127549	0.153581	0.648833	1.10755	0.194935	0.233556	0.474847	0.907151	0.582579	0.167603	0.531296	3.51658	0.431108	0.846854	0.643691	0.221076	0.837759	0.700581
AL683807.1	0	1.32338	0.109321	1.0356	0.424587	0.200624	0.659492	1.18653	0.476651	0.0455693	0.112254	1.29204	0.209029	0.292488	0.493048	0.340012	0.436533	0.346375	0.0930872	0	0.454006	0.275327	0.121795	0.952195	1.05429	1.48217	0.084473	0.0717769	0.410373	0.0899344	1.82407	0.0303129	0.0846125	1.14842	1.60629	0.0508108	0.566161	0.548131	2.18446	1.78427	0.029441	0.137598	4.37155	0.232233	0.598151	0.818171	0.0950196	0.737257	0.494207
AL662844.4	0.685146	2.41783	0.736633	2.05542	0.471863	1.42579	0.610355	2.66042	0.685854	1.40335	1.13016	2.06479	1.21776	0.284851	2.14328	1.11373	1.52369	0.400137	0.988239	0.727389	1.33529	1.90328	1.659	2.74301	2.80901	3.24293	0.80044	0.699028	1.343	0.741721	1.70116	1.11703	0.207864	1.53111	2.65758	0.488155	0.540892	0.339047	2.6449	1.90855	1.51885	2.35414	1.71084	0.621456	0.99503	1.62284	2.52105	3.31659	1.34812
AL662844.3	0.183464	1.91211	0.442273	0.363967	0.408983	0.354294	0.430335	2.28584	1.05601	0.493814	0.121644	1.06676	0.724848	0.126782	0.73398	0.900671	1.09693	0.417057	0.224165	0.140102	1.85386	0.628125	0.351957	1.1465	2.8601	1.78462	0.244106	0.345695	1.2847	0.411489	3.05853	0.0437983	0.203758	1.44289	2.48666	1.02781	0.181785	0.237594	3.1212	1.3713	0.382846	1.7893	6.31635	0.279623	0.656833	1.26659	0.494249	3.72835	0.357034
AL645608.7	0.303135	3.65184	0.454116	4.53037	0.77712	1.85996	3.21489	5.08303	0.147931	3.23105	0.633122	1.16772	0.958125	0.240903	1.91542	2.38106	4.18674	1.10945	0.977817	0.625018	2.90524	0.7213	4.84126	2.3111	9.28446	0.85144	0.241999	4.00973	2.36108	1.05742	2.43539	2.17102	0.393899	0.214566	2.82129	0.382104	0.30036	1.65862	2.07733	1.56339	0.864514	1.7443	1.50367	0.748467	0.856796	11.9288	1.60606	8.42442	1.84216
AL606834.1	6.83931	1.07364	1.46699	0.719881	0.4748	0.922331	1.76045	1.08114	0.248743	0.866294	0.69041	1.23844	0.576581	1.14477	0.68502	1.11955	0.955093	0.53797	0.936864	2.11443	1.12577	0.794027	1.08959	0.828181	0.625577	0.794198	0.684857	0.615369	1.4685	3.38587	0.251825	0.813547	1.16697	0.530445	1.62518	2.67054	0.844157	0.735545	0.542845	0.636791	0.823069	0.953996	3.66641	0.952224	0.561868	0.326761	0.828804	1.01182	0.753619
AL606489.1	0	0.757794	1.07539	2.23705	0.833885	2.15857	0.425085	0.878094	1.66063	0.0700417	0.345076	3.45171	1.13521	2.29278	1.42381	0.43551	0.525105	1.06478	1.86002	0.0372596	1.54735	0.935467	0.327606	0.813088	0.529136	0.711922	0.811489	0.809041	1.17742	0.691163	0.588422	0.512512	2.16754	1.84191	1.23446	0.507638	1.54704	0.673998	1.7161	0.175052	0.407266	0.676776	7.95699	0.594917	2.57427	0.763518	2.21994	1.28772	0.414336
AL591895.1	2.99816	18.0468	7.74387	22.1095	8.45574	20.5755	10.5031	44.2413	20.9406	8.65679	31.5655	22.9799	10.978	24.2346	14.6566	31.0188	19.6778	20.4053	18.916	12.7486	12.881	14.6818	31.1766	37.9263	38.1953	26.9769	4.89579	12.4285	20.3485	10.682	12.8098	17.6335	13.8641	16.345	23.5612	17.9417	8.55208	8.29496	27.1965	20.0465	11.249	12.2279	18.891	25.2573	16.9483	19.3814	12.7682	29.4213	15.0447
AL591845.1	0.111812	2.66814	0.64868	1.71767	2.88559	1.42238	2.55926	5.16162	0.981518	0.444487	0.570276	2.28798	1.07608	0.273408	1.8156	0.690939	1.11849	1.89262	0.958423	0.640387	2.03771	0.588939	2.28937	3.92366	4.20614	3.31311	0.343315	1.0988	1.90134	0.402063	1.64742	1.0595	0.492898	4.27169	3.38849	0.320083	0.886309	2.74009	3.18624	7.15904	0.335031	2.02439	3.17933	1.28992	5.10511	3.42021	0.741463	3.30962	2.42853
AL590764.1	0.0435496	0.533983	0.449932	0.374383	0.364057	0.458728	0.656679	1.03998	0.55583	0.586093	1.61701	1.01289	0.415812	0.180569	0.553429	1.22447	0.410102	0.772187	0.287339	0.124712	0.324966	1.491	1.66046	1.52404	0.70843	1.14378	0.369395	0.516971	0.436318	0.323875	2.75732	0.374277	0.34824	1.59264	0.787025	0.209122	0.690415	0.563986	1.72319	1.75775	0.454388	0.481364	1.8939	0.597376	0.418508	0.721574	0.21509	0.689621	0.808982
AL590560.1	0.561504	2.19787	0.111561	0.799754	1.13136	0.682451	2.08415	3.63252	2.2051	0.465031	0.801877	5.5566	0.952794	0.208937	1.296	0.366257	0.852219	0.922956	0.506638	0.395807	0.8259	0.103515	1.55363	3.29301	9.37563	2.64695	0.301714	0.488318	4.38326	0.68833	3.49308	0.278407	0.115128	2.42034	1.20989	0.25926	0.748952	1.39841	2.50168	11.2736	0.691018	0.730169	3.63935	1.42195	1.66031	0.834936	0.562407	5.30075	1.30669
AL513550.1	0.907203	1.68038	0.508522	0.344635	0.935879	0.538795	1.21273	1.60328	0.710088	0.623448	0.537522	1.75365	1.42354	0.920372	0.804014	0.335965	0.735723	0.85124	1.10375	1.65826	1.53035	1.25561	0.847043	0.796111	1.15785	1.83066	0.394865	0.403712	1.65314	1.32612	2.25936	0.359424	0.65598	1.66227	2.61621	0.556127	0.612017	0.774912	2.10311	1.41965	0.792156	1.10441	9.73202	0.776661	1.57123	0.812872	1.57732	0.947534	1.73133
AL513327.1	0.385861	1.48696	0.7851	1.29144	1.56674	0.497688	1.71384	1.87234	1.40118	0.186522	0.0522126	1.04168	0.816695	0.609482	1.09801	0.428763	0.780398	0.587155	0.727401	0.311199	2.54876	0.420586	0.334238	0.649579	1.74536	1.30412	0.365406	0.480753	1.48375	0.521497	1.96919	0.327107	0.876325	1.21697	1.75754	0.439586	0.507172	1.0657	1.48119	1.59627	0.191715	1.39266	19.2633	0.648112	1.82957	1.0275	0.491465	2.48774	1.11174
AL513320.1	0.0508312	0.716756	0.288839	0.705892	0.141643	0.133857	0.485436	2.00552	0.763255	0.164181	0.337032	2.54921	0.585751	0.245887	0.663907	0.862057	1.09411	0.508425	0.260854	0.262015	0.284476	0.452479	1.82839	5.36834	4.05689	2.26213	0.177536	0.258604	0.821406	0.27002	1.29816	0.473261	0.270978	1.2293	1.9291	0.152555	0.176281	0.427885	3.2356	3.05469	0.353575	1.0576	0.82896	0.697259	1.78153	1.68445	0.433638	3.01848	0.188849
AL513218.1	0.161724	0.941913	0.0835424	0.267364	0.225324	0.298114	0.609654	2.51871	1.09276	0	0.10723	0.528948	0.133115	0.391156	0.313987	0.252618	0.253823	0.0367636	0.177842	0.0463124	0.791949	0.249162	0.581718	1.51596	1.02765	1.00288	0.161385	0.274257	1.01922	0.343637	0.774411	0.115825	0.107767	1.19241	2.92266	0.43683	0.240365	0.418878	1.39113	1.08792	0.224986	0.788634	3.40665	0.443678	0.228552	0.893202	0.0726134	2.49692	0.30042
AL512791.1	0.474255	3.16599	0.979952	3.76341	2.70179	1.8317	3.81399	3.28272	2.21548	0.0567338	0.139756	3.90658	2.7759	0.364147	5.28278	2.11658	0.945188	1.00622	0.540836	0.543245	4.47275	0.865975	0.606538	1.38306	4.55388	6.07412	0.47326	1.37022	2.45239	0.970392	1.85041	0	1.05343	1.55411	3.42828	1.77127	1.09647	1.43309	4.23057	2.07962	0.146616	4.38551	9.73936	0.28913	1.90643	1.74621	1.27763	5.50731	1.51025
AL450326.1	1.56005	1.55579	1.20345	2.77854	1.2056	1.62136	1.56825	0.691099	2.24879	0.515083	0.468917	1.14899	1.98605	2.8461	2.62866	0.798358	0.764856	1.38071	1.58591	0.953061	3.18189	2.30737	0.269351	0.545946	0.274925	2.06382	1.9304	2.18702	1.42518	2.23937	2.23555	1.72807	3.54838	1.84039	0.789407	0.799067	1.58699	2.90928	2.31409	0.522392	1.56262	1.67702	2.03532	2.54891	1.81079	0.545691	1.96128	1.08697	1.32478
AL391834.1	0.875113	2.38833	0.874957	1.23207	1.38446	1.18942	1.84457	0.2931	1.82268	0.638255	1.64712	2.25695	1.05955	0.819331	1.95314	0.85671	0.708891	0.333695	0.579468	0.711392	1.47453	1.14046	1.82774	1.90524	0.803625	4.07779	0.676086	1.08511	2.62756	1.03971	0.570744	0.768269	1.12867	2.49768	4.79551	6.06613	0.363624	1.27954	1.48933	1.36728	0.706898	1.57849	6.98226	1.54891	1.24471	2.10481	0.963295	4.55962	1.76795
AL391244.3	0.560511	1.89636	0.54692	1.81211	0.971838	0.579479	0.91823	1.20704	1.30921	0.547594	0.646932	1.91625	0.498951	0.559491	1.49495	1.02841	0.679567	0.594614	0.51745	0.499372	0.774542	0.476201	1.50838	2.69841	2.99711	2.18092	0.258952	0.821452	1.06678	0.382295	2.46309	0.386564	0.511842	1.27349	1.59446	0.348903	0.719938	0.672117	2.26191	2.15993	0.736449	1.26879	3.41372	0.797338	1.50211	2.53676	0.661793	2.62989	0.517851
AL391244.1	3.04274	3.40076	3.95862	7.19562	3.50313	3.9107	4.44966	5.8634	5.3585	3.61973	4.87346	4.08632	3.05074	6.67146	5.75942	4.62713	3.7115	3.3645	5.11308	5.17786	2.99579	5.0801	6.39568	5.54008	4.39209	5.64553	3.7236	6.05186	3.71905	3.75593	5.66283	3.99068	3.53784	5.67973	3.49617	0.69147	4.19976	4.23237	6.12505	5.73908	4.18944	5.94323	3.9139	3.05733	3.20648	4.42604	2.95163	5.28424	4.20013
AL391095.2	0	0	0	0	4.38178	0	0	0	0.125594	0	0	4.43791	0.0275387	0	0	0	0	0	0	0	0	0.0572735	0	0.0522699	0	0	0.33387	0	0.0270325	0	0	0	0.278684	0.0493368	0.831373	0	0.0828772	1.29985	0	0.300089	0	0	0.568357	0.458936	6.57226	0.057745	0	0	0.0443931
AL390728.6	0.964242	15.1055	2.68713	6.44351	3.83235	2.90003	3.67319	11.5132	7.01067	4.93119	6.999	6.84232	2.79874	5.87428	7.34499	3.20488	3.93702	1.26902	2.9764	4.70871	6.56795	3.12752	4.3811	19.1555	22.8704	18.2531	2.10169	4.89125	9.12757	3.03734	3.29418	2.05356	3.58469	6.92989	14.9953	18.4143	2.90396	4.27199	4.86016	17.5704	3.26532	7.24282	16.0698	4.73375	5.86674	10.7912	3.15592	14.0636	4.04027
AL365361.1	0.00454137	1.48119	0.506726	1.47154	0.860517	0.478363	1.24175	1.25424	0.402326	0.405823	1.19842	1.3137	0.738632	0.426809	1.63196	0.924216	0.891969	0.445979	0.526032	0.322524	1.11406	0.693452	0.222159	0.834367	0.36476	1.84212	0.46678	1.22709	0.977504	0.839522	1.77353	0.266703	0.42367	2.28228	1.7235	2.80225	1.01696	1.31152	3.33869	1.89002	0.593877	0.93307	3.48087	0.481745	0.857441	1.15377	0.285468	0.632842	3.89024
AL365330.1	0.744279	1.27764	0.861226	4.09495	0.763216	1.03486	0.987616	2.78197	1.69871	0.86543	0.355311	2.51004	1.09781	0.905225	1.91268	1.86014	1.46851	1.21818	1.30953	0.750244	1.91606	0.652335	2.01323	3.12557	4.26784	3.43171	0.505048	1.34632	1.23158	0.948884	2.1859	0.767584	1.19031	1.51021	3.06673	0.464618	0.855462	1.61931	3.4145	2.45666	0.662671	2.09055	5.34063	1.14345	1.24537	1.2332	1.09611	4.0072	1.26407
AL360181.2	0.404051	1.14568	1.20015	2.77213	1.15405	0.984213	1.11698	4.19517	1.403	0.271887	0.234415	3.08356	1.57974	1.29138	3.92233	0.811467	1.78921	1.1022	0.259187	0.318195	2.1906	0.968343	0.690349	3.72436	4.64716	5.04805	0.378003	1.62736	1.71393	1.23416	3.60086	0.614926	1.41354	2.0556	6.25232	0.15158	1.57639	0.817599	5.3582	3.21637	0.281053	3.54659	3.98104	1.15467	2.91217	2.44079	1.26992	6.47825	1.58156
AL360181.1	0.0859157	0.526728	0.177528	2.15896	0.0957627	0.452495	0.0863676	0.178409	0.903047	0	0.341794	0.374672	0.226296	0.474975	0.363939	0.460125	0.385267	0.0781226	0.629856	0.196828	0.320551	0.0588298	0.370845	1.50333	3.05727	4.01153	0	0.291399	1.49942	0.121705	0.822812	0.123064	0.114503	1.11491	0.931598	0	0.425647	0	2.16784	0.308244	0.358572	1.00551	3.26929	0	0.0971346	1.18628	0.231455	1.22445	0.182398
AL359921.2	0.116453	1.85625	1.41368	3.11885	1.1033	1.28799	1.05359	6.28735	1.57374	1.03437	1.58287	3.55489	1.18858	0.925457	2.07595	3.17032	1.43606	2.19721	1.45134	1.0338	1.81941	1.61473	1.7593	2.32876	3.52234	3.39835	0.726305	1.152	1.75009	0.474268	2.44739	1.58464	0.892405	1.6829	2.52544	0.45435	0.923097	1.50812	3.17209	3.76024	1.86308	2.08221	3.48173	2.76883	2.30404	1.68833	1.41175	3.64204	1.26704
AL359915.2	0.955109	1.76731	0.388727	1.32445	0.94844	0.878016	0.890304	1.53859	1.89915	0.82265	1.64652	1.64923	1.12063	1.02404	1.26075	0.831854	0.654121	1.15796	0.66625	0.971383	1.57928	0.834345	0.803702	1.39992	1.60961	1.44428	0.78559	0.850757	1.11686	1.27097	1.74625	0.630144	0.671169	1.14723	1.9719	0.76787	0.410092	1.20692	1.57343	1.13704	0.950239	1.56944	9.32201	0.783435	1.38741	1.18689	1.36189	1.78743	1.34257
AL359504.2	0	0.569037	0.21423	0.901088	0.231123	0.332828	0.297782	1.20975	0.770978	0.148833	0.510663	1.2344	0.292588	0.163764	0.592548	0.546441	0.876705	0.350161	0.260598	0.124416	0.340773	0.189314	0.554068	2.9742	2.85109	1.57041	0.0886808	0.279082	0.663774	0.146867	0.724993	0.0990044	0.184234	0.465942	1.48109	1.06684	0.166324	0.409198	1.00791	1.80672	0.28847	1.05289	1.18088	0.307009	0.759118	0.177239	0.532015	1.31342	0.419253
AL357060.1	0.232023	1.13798	0.563328	1.02289	0.866362	0.272914	0.894099	1.01983	0.76066	0.228989	0.353834	1.03432	0.608586	0.240508	0.98285	0.49014	0.52716	0.376242	0.476275	0.385374	0.732217	1.09359	0.283759	0.608981	1.14017	0.840723	0.339587	0.83941	0.794867	0.361542	1.58426	0.182789	0.139151	1.44614	1.09719	0.649926	0.425314	0.555887	1.14871	2.10191	0.457278	0.935326	3.64722	0.509231	0.703893	0.576659	0.361149	1.09	0.615726
AL357033.3	2.42019	0.694526	1.01081	1.39613	0.918324	1.24753	0.439997	0.481181	0.966499	0.582122	0.273138	1.08537	0.508614	0.355844	0.763443	0.643476	0.438727	0.655517	0.377503	0.619335	1.44091	1.19883	0.666797	0.321792	0.209414	0.300538	1.56726	0.611272	1.71414	1.8783	3.0685	0.590065	0.343136	1.15419	0.279176	0.154543	1.32658	1.36707	1.91941	0.184746	0.680546	0.736572	3.70894	0.470896	0.785936	0.497698	1.38722	0.163083	1.17519
AL356481.3	0.164958	0.57308	0.340853	0.72723	0.275797	0.666073	0.718578	0.799271	0.0412821	0.355203	0.18229	0.639439	0.217244	0.227988	0.776404	0.34356	0.394513	0.0999969	0.201554	0.188955	0.897542	0.395337	0.435125	1.34011	0.89447	1.52438	0.0823061	0.404073	0.995173	0.272619	0.497344	0.196902	0.586255	0.713539	1.93772	0.0990149	0.136207	0.427256	1.54508	0.443871	0.114743	0.679277	1.34508	0.201134	0.777077	0.759222	0.370328	1.82851	0.671223
AL356356.1	0.142633	1.51571	0.515764	1.41482	1.53681	0.325524	1.45773	0.888556	0.571121	0.255942	0.0315239	1.31313	0.266111	0.0657108	1.20839	0.445595	0.29848	0.389086	0.243986	0.081691	1.8404	0.309277	0.273626	0.683361	0.942598	1.2487	0.142334	0.510641	2.05902	0.31991	1.49247	0.306457	0.190092	1.03763	2.19101	0.171229	0.376873	0.369432	1.7722	0.469087	0.0661425	0.927386	5.8798	0.347825	1.88134	0.689293	0.106736	1.8822	1.36263
AL355803.1	0.420439	1.85588	1.99813	4.44848	2.81176	1.94862	3.55026	1.74613	1.76767	1.62959	1.22658	2.81137	1.71648	0	6.70836	2.32673	2.11159	0.993985	2.09595	2.02272	3.13731	1.43945	1.93576	2.83759	2.65025	4.29425	1.42649	9.88688	1.90234	1.42938	2.14748	4.81782	0	1.88477	4.40692	0.201892	2.24959	1.41566	1.25374	0.603371	1.87169	10.2785	4.57104	0.307585	1.33095	1.04494	3.39796	3.86151	2.05294
AL355574.1	0.813299	2.55539	1.57549	3.29416	1.24646	2.08817	1.22636	2.21663	1.22121	0.328363	0.674063	2.43838	1.97482	1.68608	1.43547	0.907429	0.957345	0.554645	1.11794	0.989835	2.6077	1.63589	1.97466	1.71533	1.49872	2.59588	0.659419	0.862015	1.54424	0.93607	2.27177	1.31057	1.28714	1.61907	2.02096	0.854308	0.856221	1.11909	3.32305	1.36777	0.28286	1.6525	5.38824	0.185936	1.78153	2.17574	2.23666	2.65626	1.51079
AL355488.1	0.177499	1.76833	0.64757	1.37919	0.890291	0.625173	1.86239	4.49215	2.08221	0.39415	0.662001	2.29799	0.883905	1.30326	1.82097	0.628784	1.60682	0.761599	0.496106	0.222381	1.88326	0.725444	2.01115	3.93774	5.05861	4.27333	0.586732	0.677272	2.46673	0.777886	3.16961	0.111232	1.54503	2.57819	5.55341	3.68903	0.824411	1.88205	4.34508	3.74132	0.787096	2.09898	11.5184	1.48116	2.51473	2.97928	0.767078	5.21745	0.747767
AL355472.1	0.467382	1.61811	0.937345	1.34538	1.07254	1.10047	0.773854	1.884	2.02283	1.21361	1.89582	4.63594	1.35778	1.51992	3.31913	1.86504	1.99722	1.44996	1.73336	1.35418	0.743678	1.7696	3.12499	5.97895	5.11525	3.12899	1.01511	1.49196	2.38131	1.44098	2.45747	1.33893	0.769459	1.58925	7.30373	0.165025	1.1169	0.890116	2.77483	5.81965	1.22392	2.68136	1.4198	1.45822	2.61098	1.89805	1.65413	3.22167	1.51755
AL355353.1	0.814377	0.881072	1.3363	2.34421	0.373765	3.48174	0.529721	9.64921	1.65441	2.99142	4.57383	1.32308	2.7759	1.5228	1.1499	3.0359	2.40593	1.08898	2.80954	1.4267	1.65326	1.80412	10.4077	5.86754	6.72123	3.49489	0.573649	1.40813	3.28224	1.08575	0.866585	1.50958	1.78763	2.1475	2.42404	0.40256	0.759457	0.434269	3.07678	3.35145	3.26554	3.67535	0.911438	2.10276	0.595759	3.83637	2.06486	5.15836	1.52551
AL355102.4	0.57836	0.551565	0.26557	0.0849913	0.28651	0	0.775202	0	0	0.0691875	0	7.13061	0.0705259	0.710531	0.0907383	0	0.0192111	2.99957	0.282667	0.61342	0.0599404	0.0146676	0	0	0.0871139	0	1.11154	0.0484348	0.0276918	0.4855	0.136764	0.0306826	4.82463	0.0252701	0.0387114	0.0257152	0.742863	0.970926	0.098271	0.653243	0	0	1.28088	0.235065	1.21089	0.236614	0	0.0339204	0.295593
AL355075.2	0.396866	1.17599	0.239179	1.22473	0.55294	0.313528	0.964137	0.412057	0.94353	0.106821	0.0438564	2.1153	0.370217	0.548506	1.47099	0.265679	0.444911	0.360868	0.096982	0.0757664	0.92544	0.249104	0.0951682	1.15737	1.21048	2.26802	0.0660056	0.33651	1.64604	0.327941	0.950193	0.0473718	0.264458	1.13144	1.31489	1.03227	0.458772	0.428299	2.35172	0.177982	0.0920184	1.93529	5.48333	0.120975	0.747814	0.684967	0.41578	2.35669	0.912752
AL355001.2	1.40697	1.48103	1.09706	2.89655	0.562194	2.41878	1.57449	1.92939	1.21576	3.17252	2.69303	2.06452	1.46836	3.85244	2.39896	1.52834	1.49992	1.61729	3.40577	3.10165	2.00566	1.05429	3.72402	3.20176	1.8893	3.33115	2.05305	2.77616	0.866538	1.41018	2.93784	1.86321	2.90112	2.34878	2.0869	0.350556	3.78772	2.54404	1.55278	2.97633	2.23432	2.48549	1.37093	2.0392	1.11048	2.23591	2.32427	1.66047	1.66256
AL354836.1	1.71781	10.7592	1.41501	5.77192	1.0091	4.08348	5.08719	16.6305	1.74282	2.72422	1.63151	4.62297	1.07001	4.52377	5.40832	2.88012	2.76894	1.09762	5.00333	2.5261	5.00172	2.19355	8.88432	12.4177	8.11886	12.2952	1.15825	2.46697	5.05663	2.46626	6.20016	3.25857	2.19657	5.86043	6.46054	0.111471	1.38007	1.50313	10.5698	5.95486	0.904239	3.80351	7.06665	3.01442	2.572	8.07718	1.9595	18.6003	4.60789
AL354733.3	0.891761	1.68985	1.13071	1.92996	1.31023	1.15282	1.42617	4.37696	1.15643	0.349131	0.215009	1.59091	1.52141	0.672272	2.63281	0.723616	1.89038	0.51601	0.475461	0.232156	4.31018	0.88818	0.233284	2.17845	2.34906	3.54866	0.566294	1.1915	2.64628	0.488067	2.58799	0.0580608	1.35055	1.96057	2.56388	1.31385	1.08442	1.04988	4.27706	0.945282	0.225563	2.31926	5.83921	0.444815	1.19152	2.85438	1.23759	4.7499	1.67806
AL353804.1	0.525782	0.687666	0.869137	1.20533	0.468834	1.03382	0.951384	0.29115	0.842119	0.264171	0.0929639	1.52859	0.877086	0.484453	0	0.312872	0.44011	0.414344	0.925092	1.40529	1.01354	0.576037	0.252164	0.350475	0.5702	1.58549	0.419743	0.713313	2.12975	0.918588	1.00708	0.502078	0.280291	1.8608	1.33026	1.13615	0.27785	0.499334	1.44726	0.691669	0.0975272	1.23069	16.4821	0.256434	0.871842	0.338788	1.35349	0.555061	1.82317
AL353622.1	0.227577	1.73406	0.235121	0.956709	0.697566	0.522242	0.661811	7.49372	1.76961	0.446286	0.366455	1.12241	0.717167	0.831267	0.372983	1.18253	1.07154	1.4781	0.357512	0.251373	2.57001	0.500885	1.88276	9.1527	5.36301	4.69627	0.389314	0.321612	1.29764	0.339647	1.90274	0.605385	0.140818	1.93685	7.06513	0.643978	0.370455	0.957848	3.7101	4.25741	0.531436	1.63822	4.90429	0.460824	0.762694	2.78316	0.634985	1.95633	1.66512
AL353593.3	0.0206917	0.152227	0.684085	1.53251	1.42992	0.326934	0.208006	0.601546	0.466045	0.0891106	0.164634	2.25588	1.25351	0.114392	0.964154	0.110816	0.872196	0.413927	0.121354	0.118509	1.35101	0.524232	0.148856	1.42237	0.757343	1.7511	0.165187	0.444472	0.789109	0.337077	0.242201	0.207469	0.110306	0.488202	1.68273	0.347762	0.389545	1.33984	1.32897	0.111355	0.0575717	1.1301	8.66104	0.378442	0.865566	0.999957	0.278716	2.62128	0.878565
AL353152.1	0	0.0824833	0.382251	1.33454	0.0374901	0.106288	0.574804	0	0	0	0.0446029	0	0.0664444	27.0554	0.0474928	0.180134	0.0603312	0.0611683	0.246582	0	0.156865	0.0460625	0.387152	0.0420384	0.10259	0	0.0335645	0.152106	0.21741	0.0714692	0.0357913	0.240891	0.179307	0	0	0.121135	0.0333272	0	0.0771532	0	0	0.262431	0.274262	0	0	0	0.211429	0.0532622	0
AL163051.2	1.29049	1.52959	0.777739	1.08095	0.431519	1.06481	0.951336	0.491292	0.839684	0.370506	1.65425	1.12554	1.03388	1.60522	0.98701	0.863909	0.945188	0.547602	0.567642	0.665198	1.36419	0.751101	0.587971	0.752687	0.809092	2.07126	1.05169	0.924017	1.39024	2.31554	1.21301	0.985849	1.26124	0.761197	1.78799	2.84022	0.468848	0.863474	1.2334	1.08032	0.658276	0.978908	14.4395	1.45548	1.36173	1.1285	1.10091	2.21382	1.16437
AL162724.2	0	3.39842	1.96202	4.54814	0.800925	1.29754	1.03192	4.36986	2.15793	1.32624	1.22513	1.56681	1.65608	0.425627	1.01462	2.7488	1.97937	1.54013	1.50511	0.529135	2.01073	1.30037	3.5447	3.46407	3.70503	5.31723	0.409749	0.696329	2.75363	0.581654	1.47465	1.47037	0.410426	1.81649	6.77122	0.67778	1.06799	1.26293	3.47315	2.57804	0.785443	2.26929	22.0419	1.50197	0.986484	1.70085	1.79754	6.74597	1.14413
AL162586.1	0.478406	1.83743	0.654173	2.51229	0.564604	0.503927	1.55592	1.88461	0.475378	0.462051	0.345191	1.70789	0.620779	0.525072	3.78484	1.28734	0.984308	0.268683	0.587978	0.435176	1.54212	0.501009	1.05274	2.27741	2.42482	4.03429	0.329969	0.906746	1.36881	0.652775	1.41493	0.574407	0.300041	1.89232	3.14043	0.126688	0.557679	0.728889	3.93766	1.41351	0.743846	2.3878	4.93355	0.257347	1.43173	1.86511	0.758127	4.47858	1.23969
AL162274.2	0.333312	1.69314	1.08228	2.51902	0.689953	1.65515	1.62746	1.97754	1.00097	0.410124	1.13657	1.79963	2.10074	3.55373	2.1851	1.19004	1.32383	0.69275	0.837784	0.872683	1.77655	0.65209	1.23317	1.19024	2.66261	2.77907	0.665225	1.13049	1.20034	1.07921	0.810696	0.886652	1.39611	1.57283	3.356	0.800271	0.471801	1.10996	2.07524	2.56251	0.92739	2.41484	9.57715	1.13214	1.29201	1.90663	1.19725	2.94065	1.81958
AL162171.1	2.66411	0.620923	0.65967	1.0483	0.343572	1.1596	0.686129	0.228602	0.859565	0.450393	0.204378	1.28021	1.08736	0.152151	1.78759	0.668186	0.493657	1.14115	0.613364	1.08447	0.862541	0.497514	0.348464	0.522845	0.358162	0.963772	0.307597	0.896111	0.925054	1.4191	0.42172	0.693819	0.234747	0.285714	1.07432	0.502199	0.74174	0.342162	0.707059	0.315972	0.490081	1.51744	1.07719	0.0805376	0.124462	0.273605	2.31326	0.8019	0.654396
AL161935.3	0.136673	1.34065	0.800153	1.38582	0.761686	0.191952	0.870147	0.756823	1.43655	0.686691	1.63115	0.993365	0.629977	0.629649	1.51169	0.650629	0.817166	0.662804	0.935164	0.313109	1.14733	0.779877	1.50761	1.25267	1.01901	1.39594	1.00017	0.978606	0.795083	0.12907	1.69674	1.1746	0.425013	1.02114	1.23497	0.164074	1.03824	0.589991	1.04501	5.39383	1.20419	0.770149	2.72418	1.24984	0.463559	0.81775	0.490925	0.793561	0.580309
AL161669.3	0.406911	1.72132	0.65162	2.12577	0.181419	0.857236	0.654482	2.66167	0.824846	0.722863	1.05221	6.47695	0.790435	1.40597	1.53695	2.25187	3.2297	0.795503	0.447465	0.233052	1.61307	0.292559	3.60059	8.39144	12.7215	9.88555	0.324846	0.414033	2.48553	0.4179	0.584546	0.34971	0.949033	1.3681	7.72135	3.83465	0.90717	0.711406	2.59014	2.99278	1.10387	2.4605	1.16129	0.967487	2.27722	3.25869	1.0414	8.82768	0.799076
AL160006.1	0.667436	1.72411	1.44498	2.80193	1.60489	1.26784	2.07692	2.63957	1.15984	0.900258	0.641431	1.86412	1.64194	1.30077	2.7399	1.9981	1.34851	1.17288	2.45751	2.12608	2.02504	1.15539	1.24084	1.98236	3.20611	1.5921	0.991571	2.00938	1.87109	1.26682	2.28628	1.50922	1.18436	1.3757	2.01257	0.576178	1.06258	1.16543	2.04275	1.30492	2.23262	2.42823	2.31349	1.16585	1.56429	1.91044	2.15498	2.6482	2.5155
AL158212.3	0.772329	1.03391	0.562792	1.8258	1.28919	0.660256	0.836402	0.821262	1.14848	0.216919	0.420554	1.38302	1.19402	0.706464	1.8597	0.599455	0.364735	0.403722	1.29105	1.61978	0.789991	0.694906	0.42409	0.559586	0.671427	0.979922	0.752093	0.991273	0.696976	1.00156	1.02432	1.36279	1.31274	1.27205	1.00467	0.38968	0.495386	0.681295	1.32228	0.642533	0.887585	1.45069	5.60802	0.313901	1.16002	1.17458	2.20126	1.21119	2.02777
AL158152.2	1.74903	1.31973	0.486501	1.24557	0.824782	0.637729	1.28486	5.86699	0.505047	2.02793	1.24888	1.17344	0.442963	0.371895	1.23481	1.44107	1.08596	0.183505	0.197266	1.61818	1.06668	0.506688	2.90364	2.186	3.76165	1.37416	0.604162	0.304212	1.56536	1.19115	0.78741	0.289069	0.896533	0.872947	2.91769	0.0807568	1.06647	0.522707	1.38876	1.08607	0.561508	2.01197	1.64557	0.61517	0.608434	1.1146	0.483265	1.27829	1.85658
AL157392.4	0.137465	0.674212	0.142022	0.24241	0.204294	0.386129	0.644878	1.14182	0.344018	0.148001	0.425344	0.799299	0.271556	0.12666	0.485253	0.3272	0.369856	0.124996	0.201554	0.104975	0.384661	0.125504	0.725209	1.20266	2.28276	1.40403	0.0914512	0.207217	0.888547	0.162273	0.828907	0.262536	0.244273	0.648672	2.07022	0.33005	0.317816	0.356047	0.840858	1.64397	0.191238	0.476686	14.6962	0.502835	0.518051	1.07556	0.123443	1.01584	0.632312
AL157392.3	0.346819	0.93412	0.511304	1.22146	0.894753	0.72243	1.27411	1.54557	0.492971	0.287392	0.268711	1.04229	0.866667	0.304298	1.82953	0.64696	0.624708	0.638692	0.404238	0.565776	1.60475	0.512984	0.43172	1.01426	1.18957	1.93605	0.434558	0.687275	1.20212	0.767294	1.56329	0.313973	0.715398	1.14123	1.81868	0.817497	0.531876	0.815021	1.88383	1.17614	0.483841	1.36186	9.2227	0.693113	1.41533	1.07208	0.990311	1.71084	1.06307
AL139349.1	0.657546	0.571093	0.283059	3.00754	2.07657	0.577186	1.95547	1.47922	0.905059	0.294976	0.108995	4.69952	0.234532	0.60586	1.43137	0.29346	0.516004	0.498251	0.120513	0.219683	1.94219	0.375206	0.512457	2.67093	1.33705	2.43855	0.273403	0.371697	0.885467	1.08669	1.3994	0.156976	0.474681	4.2664	3.31737	0.164453	0.922997	2.48369	4.05355	1.37615	0.0381151	4.70283	8.56377	0.450982	6.10214	1.55101	0.934913	2.25603	0.58165
AL139287.1	1.76105	5.42339	2.53873	8.39564	2.64762	2.50209	5.26977	8.92968	8.91684	1.94012	1.03188	8.5728	3.42493	2.32073	7.72004	4.60602	3.93012	3.2771	3.42276	1.54811	10.3523	2.72019	2.00346	7.72918	7.57823	12.4295	0.735637	4.02824	7.4387	3.36485	10.2413	1.99453	3.05657	6.61906	12.5822	1.03247	2.15073	4.50823	12.3065	8.88956	1.65228	7.50919	16.2521	3.14597	12.6869	8.31259	4.59713	23.4119	6.04275
AL139246.3	0	2.72485	0.156542	1.03537	0.0281475	0.718209	0.25386	3.25126	0.492946	0.163132	1.67439	0.330381	0.349205	0.418827	0.267432	1.03687	1.10977	0.160738	0.518374	0.144634	0.565316	0.345837	3.30641	0.599685	1.8486	1.62127	0.176402	0.970708	1.09365	0.554476	0.859907	0.651098	0.370214	1.19165	1.32348	0.485057	0.200176	0.130816	2.80944	1.72144	0.597237	0.295549	2.1278	0.415682	0.39971	0.697368	0.453544	1.63956	0.187642
AL139089.1	0.535057	0.67594	0.217767	1.00787	0.325299	0.239103	0.488974	2.39049	1.02253	0.0872827	0.666528	1.10775	0.24556	0.336136	0.60669	0.390753	0.276286	0.324349	0.213957	0.0928624	0.514196	0.310863	0.699852	3.52605	2.12652	1.58507	0.177978	0.201638	0.607857	0.218195	1.13872	0.185795	0.17287	1.5302	1.08416	0.291967	0.240981	0.377957	1.65504	1.62879	0.225563	1.11746	2.46789	0.622741	0.971545	1.09698	0.393118	2.69589	0.240952
AL138900.2	58.7752	0	0	0	0	0	0.10187	0	0	0	0	0	0	0	0	0	0	0	0.297163	0	0	0	0	0	0	0	0	0	0	30.8631	0	0	0.135055	0.239094	0	0	0.301227	0	0	0	0	0	0	0	0	0	0	0	0
AL138756.1	4.54053	0.957956	1.20907	1.1457	1.26797	0.967568	0.995692	0.719538	0.122711	0.573673	1.3178	0.874337	0.658674	1.61743	1.59012	0.612739	0.513052	0.240765	0.50326	2.09689	0.652502	0.691652	0.663166	0.853894	0.50185	1.20673	0.41102	1.11241	0.898009	2.40329	0.500901	0.824089	1.83413	1.34972	0.720723	1.14197	0.987895	0.364072	0.738587	0.797508	0.63667	1.50905	3.74946	0.454381	0.628282	1.38567	1.26812	0.398585	1.09303
AL138724.1	0.494015	0.463211	1.09584	0.960839	1.39278	0.550979	0.555039	1.90084	0.479981	1.12633	1.57996	0.633636	0.564493	0.341388	0.482131	0.881907	0.912176	0.409569	1.32085	0.948681	0.70474	0.696442	1.31705	1.48912	2.23065	0.784423	0.753968	0.772063	0.591684	0.432231	1.14414	0.790865	0.387289	0.959892	0.735232	0.523286	0.575875	0.489237	0.733239	2.45009	0.808544	1.15256	0.987311	0.451765	0.525669	0.682113	0.521909	0.989365	0.447277
AL137145.2	0.0256133	0.734893	0.296378	0.602981	0.296908	0.221233	0.272928	0.691435	0.338444	0.143397	0.203792	0.439343	0.279974	0.16284	0.741402	0.397801	0.252683	0.167688	0.0525765	0.0938855	0.48737	0.431444	0.383263	0.294514	0.442697	0.792296	0.122686	0.208493	1.36752	0.21044	0.550556	0.132076	0.0341356	0.429067	1.1572	0.221388	0.238561	0.404677	0.622776	0.431901	0.128277	1.41222	6.55795	0.30918	0.66603	0.488045	0.395609	1.06265	1.15822
AL137003.2	1.50735	4.00197	0.836576	2.43843	0.951138	1.73866	0.782685	1.59092	1.35615	0.616963	1.05725	2.9336	1.40682	1.2913	1.50834	1.02298	0.648001	2.25417	1.07765	0.806234	1.76038	2.68698	1.15608	3.61997	2.67875	2.98098	1.1499	1.0915	3.06388	2.06467	1.84922	1.05278	1.17047	1.80027	2.13874	6.22874	0.75912	0.66145	2.10028	1.48608	2.80754	2.01683	4.1478	1.31008	1.57742	1.56526	1.80106	2.67297	2.1951
AL136304.1	0.652217	0.952042	0.802187	0.739374	0.415411	0.785154	1.18641	2.70873	0.792795	0.267507	0.782522	1.35441	0.429474	0.3434	0.85515	1.02572	0.752065	0.395371	0.728604	0.498063	0.984954	0.340265	1.16184	3.72647	3.25239	2.03926	0.340921	0.421354	1.18444	0.593938	0.859274	0.622814	0.62088	0.952618	1.06643	0.41013	0.092321	0.482656	1.46045	1.44857	1.38263	0.726969	3.96755	0.340821	0.456475	0.90055	0.641466	1.67216	1.21981
AL136295.7	2.45032	3.11753	1.14328	2.71802	0.954435	1.92884	2.47645	4.07605	1.22642	1.6311	1.4849	3.73423	1.63084	1.11065	3.22733	3.53939	2.26845	1.9765	1.64182	1.2223	2.51899	1.08247	4.53008	2.98017	5.70574	5.78579	1.11742	1.57873	2.98033	1.73551	3.15411	2.22663	1.14121	2.37779	4.49962	1.92942	1.55333	1.72312	4.71406	4.2065	1.20958	3.44331	3.75968	1.30108	2.02558	2.00087	1.78632	5.73678	2.44717
AL136295.2	0.148139	1.37527	0.371691	0.61576	0.141529	0.356665	0.425479	2.28516	0.476651	0.478478	0.813839	1.59967	0.209029	0.146244	0.791865	0.604466	0.341634	0.25016	0.34132	0.4121	1.00671	0.304309	2.375	1.19024	3.18438	2.19238	0.253419	0.430661	1.03961	0.299781	0.788176	0.303129	0.366654	0.499313	1.72102	0.787568	0.251627	0.274065	1.31068	2.1639	0.176646	0.908143	1.32297	0.270938	0.693855	0.613628	0.228047	1.37398	0.651455
AL136084.3	0.108031	0.927233	1.07891	9.04896	3.77292	0.644831	1.80998	0.448664	0.324427	1.20188	0.143258	0.88988	1.23303	0	6.94055	1.0607	0.581323	0.491158	0.739184	2.06243	0.604592	1.25754	0	0.360055	0.256281	0.630513	0.898368	10.1372	0.232763	0.561117	0.0766375	0.618963	0.143976	0.679702	0	0.345838	0.57089	0.279809	0.57821	0.258391	1.85357	1.68577	0.880888	0.329305	1.58779	0.596655	1.58451	0.114047	2.21703
AL135999.3	5.58749	0.0477428	0.0402279	0	0	0	0	0	0	0	0	0	0	0.0269074	0	0.0173775	0	0	0.0570904	0	0	0	0	0	0.0197937	0	0	0	0	9.4594	0.0414333	0.0557727	0.0259465	0.0459343	0.0351835	0	0	0.0252127	0	0	0	0	0	0	0	0	0.0174827	0.0616582	0
AL135999.1	0.292479	0.663453	0.282029	2.33384	0.260801	0.462122	0.833049	1.72082	0.651438	0.24142	0.142212	1.73607	0.330617	0.626562	1.08063	0.735331	0.375977	0.345734	0.343071	0.139594	1.38223	0.450612	0.287559	1.37691	1.66028	2.67435	0.111882	0.347198	1.4494	0.655997	1.51984	0.0837881	0.409287	1.28239	2.66926	0.18141	0.280142	0.366147	2.91281	1.83635	0.0949409	1.2551	2.53063	0.294212	0.98099	0.639415	0.358947	2.75574	0.61058
AL133371.2	0.215082	3.09874	1.49993	2.20457	1.73806	1.07614	1.51349	0.558286	2.66438	1.3894	0.570432	1.79774	2.33685	1.18905	4.36562	0.767919	0.385791	1.46679	0.86723	0.369554	2.20678	2.79822	3.40404	0.268817	0.929363	1.64759	0.804864	0.97265	1.25122	1.67572	5.66453	0.847214	1.28991	2.72762	0.874561	2.45292	2.07785	1.46233	1.91177	1.25394	1.64569	2.16758	11.6919	1.77018	1.03346	1.78185	1.15885	2.46927	1.99769
AL133367.1	0.832641	0.415056	0.22913	1.05491	0.147451	0.450824	0.32855	0.307023	0.566702	0.138239	0.0825532	3.47271	0.671258	0.354916	0.703216	0.382022	0.478061	0.314875	0.399338	0.205015	0.675026	0.197152	0.453448	1.0747	1.57442	1.23194	0.21743	0.365103	0.802273	0.644858	0.894299	0.245219	0.570401	0.463594	1.30786	0.228874	0.454917	0.393027	1.13347	0.670049	0.324771	1.05239	1.95644	0.249066	1.53962	0.784355	0.618429	1.48487	0.458441
AL133342.1	0.388734	0.476646	0.669366	0.228501	0.529573	0.227484	0.521037	0.98661	0.259423	0.697546	0.7446	0.376719	0.17065	0.0596963	0.548892	0.616853	0.542321	0.353473	0.633298	0.643186	0.604317	0.709816	0.93218	0.647805	0.483054	0.567203	0.172408	0.976636	0.446701	0.183555	0.229808	0.556813	0.345386	0.356681	0.936688	0.362964	0.898743	0.391554	0.346768	2.55691	0.480708	0.617835	21.3665	0.631978	0.146498	0.417468	0.34908	0.410381	0.687729
AL133243.2	0.224303	1.63822	0.947105	1.48328	0.967434	1.51007	0.970557	1.05306	0.981119	0.650986	1.13805	1.63028	0.866934	1.63091	0.998345	0.73991	0.848395	0.549798	0.629157	1.18412	1.30079	1.11519	0.855926	1.23107	0.941942	1.94946	1.0705	0.893071	2.11804	0.842698	1.07926	0.768294	0.831823	0.885872	1.49807	3.66445	0.840685	1.32611	0.715845	0.75226	1.00397	1.00186	12.4848	1.55178	2.38157	1.69666	1.10345	2.9033	0.82816
AL132989.1	1.39971	3.16329	0.708877	2.97647	1.74368	1.12747	1.93128	1.93772	1.44237	0.26594	0.254763	4.18904	1.53614	0.606912	3.27461	1.05339	1.10764	0.648851	0.48289	1.03745	4.99191	0.714129	0.789763	2.16104	3.85071	4.92561	0.492979	1.3032	4.15118	2.15772	2.80366	0.314496	0.914432	1.81313	3.37273	0.626005	1.06057	1.10183	5.35117	1.13237	0.0763625	2.71239	12.3085	0.451765	2.48233	2.53898	1.7252	7.56212	2.24324
AL122035.1	1.78205	5.99129	1.45508	1.63461	1.56981	2.60374	1.61806	0.537173	2.33056	0.557022	0.686074	2.96649	2.95255	1.70818	2.51626	0.872286	1.62401	1.09769	1.60144	2.56807	2.97588	2.22398	0.909807	1.00586	1.25658	2.47438	1.72095	2.27467	2.5267	2.74831	2.26331	1.31745	1.03427	2.03447	2.12969	1.79427	1.48094	3.01507	2.04386	1.64995	1.47949	2.20521	5.70299	1.10395	3.54206	1.70652	3.1231	2.86744	3.6002
AL122010.1	3.55691	3.06907	2.97161	3.54272	2.10465	2.75217	3.39905	4.28578	2.83528	1.6311	1.16463	2.17032	3.03614	4.36977	3.13123	3.8216	3.09155	1.81678	3.34803	2.64077	2.25276	2.49569	1.76907	2.8265	2.54481	4.35696	1.55562	2.68087	3.46286	2.737	2.17283	3.23931	2.89692	2.7974	2.46011	1.9505	1.89271	2.10414	3.92838	3.19033	1.34398	3.02646	7.04194	2.69051	1.31563	2.2434	1.73506	9.17885	2.5637
AL121899.1	0.0289533	0.0710021	0.777739	0.842441	1.35541	0	0.320161	2.04419	0.0434748	0.249379	6.37348	1.93603	0.171587	0.52021	0.224851	0.129217	0.804968	2.15882	1.40091	0.630138	0.216049	0.495636	3.70755	1.44748	1.56015	0.21123	1.24238	1.2766	0.991885	0.225577	0.52376	0.580608	0.347283	0.239094	0.575566	0	0.918025	1.46233	0.166035	0.207754	0.201396	0.640055	0.865651	0.63545	0.294606	0.279841	0.571997	0.275091	0.430271
AL121832.2	2.01156	0.928555	0.684597	1.72146	0.211022	0.747836	0.594747	1.91656	1.20818	0.891773	0.941468	1.78885	0.607748	1.60268	1.0693	1.68988	0.700401	0.796195	1.80433	0.460837	0.419403	0.583367	2.41753	3.93386	1.99703	2.17541	0.566779	0.856165	0.795436	0.888372	1.30949	2.03387	0.820032	0.921299	1.41134	0.0852299	0.680015	0.39842	0.678556	2.41981	1.71198	1.72335	3.40912	1.21192	0.989958	1.53578	0.871307	1.27415	0.452172
AL121672.2	0.291737	0.357713	0.452111	0.602879	0.12194	0.326506	0.201624	0.681534	0.739222	0.0785242	0.265971	0.26505	0.360195	0.176403	0.205966	0.439428	0.196233	0.198956	0.294078	0.062658	0.357154	0.374557	0.41975	0.205101	0.240995	0.85135	0.163758	0.164913	0.565718	0.322862	0.601476	0.470112	0.315906	0.408693	0.42837	0.328336	0.3794	0.141679	0.501896	0.163544	0.456589	0.42679	12.2411	0.366831	0.742122	0.478345	0.376593	0.837329	0.387095
AL118558.4	2.82992	0.299129	0.327659	1.03249	0.135959	0.539642	0.220717	0.607911	0.293052	0.262656	0.938175	0.744717	0.787148	2.69739	0.809503	0.740367	0.897054	0.110915	1.00155	0.195613	0.432348	0.183752	0.842414	1.0062	1.43859	2.7409	0.219102	0.330971	0.283841	0.743	0.285558	0.419328	0.520211	0.661936	1.1022	0.410015	0.410933	0.126375	0.867378	1.31289	0.509083	1.04689	0.928316	0.35695	0.330977	0.336846	0.547682	1.15895	0.569711
AL118516.1	1.53366	5.64149	3.14462	8.08229	1.34125	2.01313	2.65651	5.29155	11.656	1.39717	3.91107	6.89396	4.76978	1.10875	1.48256	5.07557	3.74548	3.60437	1.4184	1.24325	2.88304	2.11647	6.0088	10.2034	6.2131	3.58044	1.53044	3.78789	3.47727	1.73802	2.3852	3.27827	1.00626	3.53502	10.7027	0.481527	2.01058	2.90284	4.24861	6.0103	4.62825	5.76825	1.92393	4.14276	2.96101	1.66151	2.4578	4.18466	4.68354
AL117379.1	0.677173	1.48884	0.217124	0.772077	0.468488	0.196772	0.84505	1.30921	0.666185	0.125703	0.743162	1.79901	0.445907	0.387276	1.05508	0.687809	0.921454	0.23356	0.273899	0.240729	0.609851	0.351762	2.95654	3.09358	2.51652	2.24871	0.209716	0.475191	0.965983	0.430011	0.969063	0.167236	0.435686	1.3498	3.84015	0.25229	0.416467	0.786248	2.51745	3.43485	0.617216	1.2146	6.47373	0.726028	1.1616	0.902767	0.398408	2.88418	0.520521
AL117336.3	0.48142	1.52378	0.717151	0.592291	0.836093	1.0142	0.979159	5.5332	2.57209	0.807612	7.00758	0.992756	1.37861	0.46421	1.45438	1.00932	1.06434	2.19894	0.902853	0.294963	1.25314	1.6559	1.30479	2.02898	2.0489	1.84596	1.35185	0.97463	1.34604	0.610592	2.40654	0.930125	0.805737	1.61134	2.16493	1.22308	0.665601	1.5804	2.51677	3.81594	0.638589	1.38309	8.27708	0.716682	2.79737	2.21059	1.53823	2.57069	0.903204
AL117209.1	0.649141	1.24074	0.157802	1.41406	0.383051	0.321774	0.61417	2.45808	0.544695	0.185001	0.12659	0.80485	0.339444	0.343037	1.06486	0.766876	0.342459	0.104163	0.335923	0.306177	1.24659	0.130733	0.19229	1.26471	1.86348	1.0586	0.24768	0.12951	0.851524	0.824888	0.60949	0.164085	0.279896	0.495513	1.03511	0.0458402	0.132423	0.27198	1.13866	0.445241	0.132804	0.595857	1.86816	0.174595	0.47488	0.42179	0.171448	2.20704	0.445861
AL109811.3	0.508779	6.41663	0.901105	3.58077	1.27596	1.32066	2.26502	8.98032	1.74619	0.762971	0.722875	3.75073	1.37599	1.15523	3.6433	3.22758	1.71112	1.25571	1.27883	1.20721	3.28804	1.13224	3.73858	4.86002	11.4355	6.36311	0.580242	1.45856	3.96986	1.02959	3.46107	0.8589	0.871801	2.40083	6.53475	2.05048	0.57614	1.24719	5.96031	4.69381	0.73308	3.42618	5.23515	1.82783	2.71173	3.78847	1.55013	6.56043	2.79677
AL109614.1	1.05642	0.138785	0.233879	0.948089	0.294373	0.397418	0.265493	0.0783466	0.453217	0.0406208	0	0.987201	0.347816	0.208581	1.0122	0.134707	0.270698	0.0343068	0.0553191	0.216088	1.2669	0.361684	0	0.565863	0.191796	0.605558	0.0752999	0.17062	0.63407	1.04219	0.762809	0.0540423	0.201131	0.4896	0.477286	0.0452932	0.448605	0.195443	0.908714	0.676813	0.157463	0.490622	12.1007	0.690047	0.767804	0.520946	0.237163	0.597452	0.200246
AL080317.3	0.146545	0.727727	0.469347	0.271342	0.428768	0.127349	0.592944	4.58744	0.379576	0.209054	0.621856	0.442023	0.627231	0.627869	0.447467	0.631131	1.24528	0.146577	0.837979	0.239204	0.502332	0.250862	0.595645	0.645628	2.51796	0.582671	0.19742	0.314787	0.769628	0.285435	0.994112	0.346347	0.532206	1.68989	1.29769	1.07314	0.221435	0.450731	1.21013	0.788647	0.7798	0.562163	10.376	0.355131	0.352071	1.44169	0.3257	0.910827	0.560001
AL080317.2	0.228281	0.559815	0.318396	0.226439	0.203556	0.0961838	0.355697	3.48419	0.222804	0.393245	0.393536	0.365023	0.345735	0.914969	0.24175	0.346395	0.696095	0.134924	0.317975	0.143819	0.14905	0.195392	0.45983	0.513566	2.36736	0.133235	0.205022	0.296799	0.545959	0.153603	0.60729	0.392382	0.425934	0.767517	1.13451	0.726228	0.0678576	0.532142	0.864005	0.880443	0.635159	0.237482	16.3184	0.25051	0.193568	1.1032	0.122997	0.704907	0.205971
AL078581.1	2.78973	1.76733	1.20092	1.59884	1.34744	1.81211	0.794582	0.772405	0.977415	0.60071	0.986511	1.0814	1.2859	1.86358	1.08326	0.913033	1.29268	0.972396	0.954417	1.33148	1.5179	1.81473	0.735874	1.04601	0.661809	0.474894	1.29915	2.15521	1.20215	1.81125	1.38534	1.19879	2.47865	1.48098	0.672212	3.01413	0.78319	1.08385	0.639918	0.750665	2.58734	0.967391	5.18141	0.850382	0.735937	1.09138	1.37784	0.294509	1.48064
AL049869.3	0.396629	0.382114	0.117079	0.786855	0.252621	0.328262	0.655032	0.294151	0.638097	0.030502	0.0375687	1.81203	0.596968	0.234934	0.820059	0.075863	0.355716	0.386413	0.0415389	0.259615	0.528507	0.543174	0	0.212452	0.316842	0.785411	0.113085	0.384354	0.384559	0.642112	1.35661	0	0.302058	0.233952	0.563188	0.68021	0.112285	0.550341	0.779828	0.203286	0.0394129	0.368406	9.24038	0.103631	1.08902	0.704117	0.559696	1.16642	0.300727
AL049840.5	0.286386	1.33438	0.355055	1.06054	0.957627	0.422329	0.978833	0.0594696	0.215011	0.123334	0.113931	1.45706	0.716605	0.158325	1.98145	0.357875	0.513689	0.156245	0.167962	0.524874	0.988365	0.372589	0.32964	0.429523	0.436753	1.04467	0.257207	0.420909	1.16622	1.05477	1.6761	0.164085	0.877855	0.777055	1.50091	0.309422	0.198635	0.40797	1.281	0.51374	0.278889	0.856544	21.0168	0	1.23037	0.593142	0.617214	2.1768	0.75999
AL049840.4	4.09345	9.84715	4.5715	9.61607	6.1052	3.49052	13.3639	7.73119	4.18548	4.11337	7.28936	9.0106	5.68615	2.53242	12.4957	11.6225	5.76903	2.6764	6.05904	10.7622	7.30903	3.17667	9.45145	7.57676	9.51271	9.89773	3.09282	8.08778	7.03059	5.1221	8.04798	8.85088	4.10459	5.79486	12.4703	2.05925	4.26843	3.66034	11.2452	11.0497	3.52529	11.1277	20.9806	2.70948	4.95853	6.62096	5.51383	15.5262	9.89041
AL049840.3	1.16429	3.5214	1.22962	2.05314	1.90334	1.52619	3.6673	1.07454	0.776996	0.557124	0.480339	3.83624	1.78889	0.464869	3.70809	1.33946	1.11381	0.517578	1.13807	2.96369	3.04077	1.15156	0.409488	1.42284	1.39418	2.45386	0.69711	1.90132	1.58877	1.2278	2.25761	1.44534	1.37928	1.86188	3.03925	1.08711	0.948544	0.871178	3.38287	1.20674	0.647894	1.78318	4.43039	0.567849	1.7551	2.25064	1.53344	4.26098	2.80134
AL049840.2	1.00465	2.17386	1.31271	2.38389	2.40427	1.18275	3.38626	0.552234	0.399318	0.699893	0.50939	3.17852	1.92627	0.449228	4.17227	1.00224	1.03352	0.617972	0.476571	1.96313	2.37028	1.29492	0.382629	1.03407	0.901262	1.59524	0.914085	1.77054	1.90996	1.48594	1.88657	1.14277	1.26017	1.18519	2.8302	0.390199	0.673397	0.880134	2.77896	1.43117	0.781038	2.34389	9.15575	0.594473	1.77057	1.10158	1.91048	3.36896	2.60334
AL049840.1	1.76776	1.72575	0.988793	2.21885	1.30521	0.984402	2.53542	1.30935	1.04822	0.169716	0.134381	1.91499	1.54217	0.949273	4.66624	0.89447	1.36325	0.276434	0.478762	0.657775	3.41327	0.963737	0.340206	1.53392	1.64846	2.43149	0.471912	1.19659	2.70741	2.21704	3.15112	0.129024	1.51561	1.31502	3.11329	0.554196	0.61361	1.15195	3.65461	1.37349	0.407266	2.09378	22.8304	0.741359	2.50779	1.39921	1.12233	5.75907	1.5179
AL049780.1	0.290954	0.396392	0.200399	0.897883	0.504468	0.23837	2.17738	1.54402	0.0970848	0.139224	0	0.892878	0.191588	0.134042	0.798831	0.34627	0.840812	0.117583	0.284401	0.074062	1.44739	0.154955	0.372109	0.32324	2.30077	1.03775	0.129042	0.36549	1.06571	0.183179	0.48161	0.138919	0.0430849	0.419514	2.16166	0.116429	0.128129	1.67466	1.03818	0.695913	0.224871	0.504468	2.37245	0.118254	0.292397	0.267824	0.406427	1.74055	0.308845
AL049629.1	2.63475	0.149565	0.201636	0.129061	0.353495	0.128486	0.0980965	0.0506593	0.109895	0	0.129404	0.0354627	0.0642569	0.708064	0.0516704	0.217755	0.0656381	0.0887318	0.143078	0.139724	0.182041	0.150343	0.105302	0.0304908	0.124016	0.320365	0.0243447	0.137905	0.4573	1.67607	0.0259598	0.244608	0.162566	0.460477	0.132264	0.117147	0.0725176	0	0.0559599	0.043763	0	0.0634477	0.198925	0.0892376	0.19307	0.101054	0.219073	0.193158	0
AL049555.1	7.76931	0.190527	0.168986	0.0108163	0.0182311	0.017229	0.0246637	0.509476	0	0.0176101	0.02169	0.0118882	0.00538522	0	0.132798	0.0218994	0.00733462	0	0.0839374	2.96963	0	0.0111999	0	0.0306643	0.166296	0.0596644	0.0163221	0	0.0105725	4.34435	0.03481	0.0585715	0.250686	0.144718	0.118237	0.00981782	0.0243101	0.0635469	0.0656581	0.190719	0.0227547	0.0106348	0.111143	0.0149576	0	0.4291	0.565487	0.0518018	0.0173622
AL049552.1	0.0821932	0.201562	0.311365	0.217413	0.519144	0.288593	0.495753	1.13786	0.370251	0.176986	0.0363317	1.11514	0.234532	0.416529	0.444885	0.34237	0.294859	0.124563	0.241026	0.0941499	1.27776	0.300165	0.197099	1.54092	1.28134	0.919453	0.164042	0.340722	2.00115	0.349295	1.86587	0	0.474681	1.22821	2.22809	0.822264	0.27147	0.496737	0.785572	0.24574	0.266805	0.71255	14.5956	0.100218	1.08414	1.89148	0.393648	1.04124	0.378072
AL035661.1	44.4821	2.0163	0.356917	0.0365522	0.0462072	0.0291116	0.11113	2.23822	0.0207493	0.0892664	0.0916231	0.0602619	0.0363973	0.0190986	0.00975595	0.296025	0.0743592	0.0251303	0.628094	15.0532	0.0128893	0.227091	0.0397643	0.293607	0.365284	0.403257	0.110317	0.0156228	0.0535924	14.5441	0.411726	0.45525	0.0184165	0.17932	0.474485	0.0497671	0.246458	0.322123	0.364522	0.495777	0.0768965	0.0179695	0.338033	0.0505472	0	0.11448	0.322635	0.175058	0.0293367
AL035587.1	0.106097	1.32693	0.668647	0.743702	1.04066	0.849354	1.07722	2.02692	0.892138	0.685374	0.590914	1.31093	0.635756	0.454573	1.90258	0.833373	0.656557	0.356952	0.606691	0.862872	1.16775	1.04614	0.824322	0.848667	0.765871	1.85769	0.667011	1.30745	0.877813	0.503482	3.22891	0.395126	0.721137	1.57706	1.47638	0.31842	0.735883	0.948064	2.62839	1.5226	0.91512	0.882988	5.53679	0.834402	0.695718	1.34775	0.819362	1.17606	1.22757
AL035563.1	0.544412	1.2469	0.30776	0.556999	0.28623	0.421976	0.474994	1.47179	0.724919	0.28754	0.449507	2.77729	0.683153	0.283935	1.01528	0.705984	0.764626	0.401628	0.195792	0.305921	0.536543	0.309478	0.871973	5.19948	4.12517	1.99338	0.26651	0.348391	1.10217	0.371045	2.15329	0.176559	0.273795	1.93885	2.11622	0.468589	0.274803	0.399077	2.22661	2.69028	0.257221	1.32238	2.03811	0.413311	1.86973	2.15582	0.747154	2.03324	0.425239
AL035071.1	4.08751	4.33879	2.68249	2.56075	2.23252	2.15669	6.1747	7.27097	1.10276	6.61317	3.67916	1.79008	1.24564	2.07108	2.13684	5.82696	4.79691	1.07927	4.65532	4.05331	1.41849	1.23435	4.97384	6.09152	8.34172	5.1523	3.198	3.0696	4.51216	2.769	3.78908	4.56912	2.26405	2.85297	6.15353	3.12587	1.83026	5.09175	2.19512	5.93518	2.99286	2.7493	6.97647	2.80854	1.19096	4.69125	0.706132	6.78987	3.74827
AL034397.3	0.209038	0.971849	0.656901	1.22106	0.524242	0.431204	0.49032	2.38743	1.21629	0.553271	0.565953	0.759665	0.303972	0.361138	1.46351	0.629725	0.734278	0.261356	0.306495	0.179585	1.43798	0.66797	1.59154	0.805562	0.858972	2.55445	0.269441	0.837001	1.90854	0.505863	3.11414	0.361801	0.417888	1.57209	1.30646	0.418245	0.44877	0.315832	2.52735	2.2968	0.351394	1.2119	3.83514	0.25488	0.364348	1.4191	0.351965	3.48948	0.573221
AL031846.2	0.150721	0.359053	0.226903	0.939743	0.302392	0.535253	0.588739	0.786923	0.821201	0.157637	0.0399737	1.55244	0.952774	0.0476139	1.30427	0.28444	0.397798	0.281931	0.15785	0.217041	1.42995	0.206409	0.117722	0.688921	0.516632	1.37606	0.232053	0.321324	0.640209	0.597815	0.783588	0.067851	0.304176	0.802668	1.36969	0.124072	0.285882	0.446149	2.30157	0.332175	0.14378	1.10317	4.10833	0.236282	1.13439	0.671894	0.672866	1.35702	0.731379
AL031775.2	0.312267	1.72299	0.685563	0.980862	0.739619	1.60351	1.7265	2.67481	0.644715	1.72303	0.983467	1.24829	1.41365	0.647373	1.26765	2.99631	1.36527	0.496898	1.48802	1.25192	2.43935	0.481097	1.40402	2.73198	4.52411	5.35365	0.662175	0.794331	1.9932	0.774102	2.4506	1.11821	0.676274	1.33538	5.00839	2.29609	0.657493	0.252749	3.13375	1.82054	1.03174	1.47199	7.74481	0.642511	0.617824	2.10192	0.595878	3.70863	1.40874
AL031717.1	0.0559593	0.480301	0.260164	0.592081	0.53017	0.26525	0.393775	0.406709	0.378115	0.120496	0.0742066	0.732102	0.331634	0.154682	0.86916	0.124872	0.376402	0.45795	0.205121	0.0961496	0.835134	0.076635	0.161028	0.59449	0.682726	0.653204	0.30713	0.284694	0.307453	0.53507	1.07184	0.0400774	0.410184	0.528122	1.21355	0.100767	0.332682	0.688462	1.12316	0.652495	0	0.873221	8.59355	0	1.67656	0.849925	0.175879	1.15197	0.118801
AL031716.1	1.01413	0.65831	0.184896	0.670629	0.332459	0.125674	0.299842	0.743258	0.627021	0.256908	0.909731	2.68821	0.333894	0.742036	0.652802	0.239613	0.668765	0.271218	0.2624	0.0683327	0.751178	0.204239	0.643732	0.52191	0.545859	0.565776	0.267883	0.269773	0.771192	0.781666	0.920446	0.256344	0.397519	0.738935	1.18588	0.859374	0.088663	0.231766	1.33417	0.535065	0.16598	0.465443	7.45856	0.272764	0.573277	1.11197	0.428556	0.850185	0.348276
AL031714.1	0.50359	0.656339	0.309259	0.926858	0.906728	0.415461	0.991236	1.16274	0.39659	0.242657	0.0466994	1.19788	0.558859	0.545126	1.29285	0.414923	0.432694	0.268983	0.376931	0.302542	1.06427	0.212202	0.491487	1.18399	2.04442	1.25377	0.256538	0.501655	1.06531	1.09998	1.31907	0.166461	0.389549	0.86828	2.1702	0.114146	0.394299	0.460624	1.96699	1.08026	0.181269	1.1357	1.78992	0.264075	0.979438	1.32259	0.392135	1.68413	0.848562
AL031710.1	31.8197	0.745522	0.593276	0.134025	0	0.177904	0.984738	0.210431	2.53603	0.181839	0	0	0.355885	12.2316	0.0953915	0.512561	0.454417	0.583582	0.742907	2.51502	0.283564	0.531983	0	1.01323	0.034343	0.0492869	4.55058	0.343701	0.218339	6.00514	0.0359443	0.048384	2.07084	0.637584	0.549404	0.162204	0.602454	0.481195	0.309932	0.12119	0	0.746731	4.59057	0.12356	0	0.326482	0.181999	0.160469	0.035856
AL031670.1	0.16541	1.4487	0.341787	0.875067	0.869165	0.39825	1.6628	0.392553	0.567707	0.0763235	0.0940061	1.37398	0.404559	0.326589	1.45141	0.421839	0.423851	0.150406	0.0692936	0.32481	1.25633	0.194165	0.237991	0.620207	1.15318	1.37915	0.259385	0.561018	1.0539	0.435154	1.55898	0.0338471	0.251941	1.4217	1.96439	0.45388	0.491689	0.459029	2.22234	0.423893	0.0328735	0.95257	5.71619	0.432182	1.2022	1.85975	0.403173	1.72127	0.777576
AL031600.1	1.2203	0.238044	0.229229	1.02705	0.340042	0.321351	1.03156	0.748691	0.458087	0.179159	0.0735557	1.0482	0.21915	1.64825	1.23356	0.297063	0.522341	0.126093	0.0813288	0.158844	0.801939	0.474767	0	0.762591	1.21249	2.06382	0.0553521	0.344907	0.609512	0.805387	1.68219	0.0794517	0.997983	1.53775	1.9046	0.166472	0.384725	0.431004	2.29023	2.28858	0.0385831	1.47867	5.27674	0.202898	1.6305	1.83812	0.199241	1.97631	0.235517
AL031186.1	0.903343	1.25867	0.0848443	1.03182	0.457671	0.216257	0.660432	1.96111	0.616551	0.132624	0.272251	0.895319	0.513722	0.340501	0.811695	0.623062	0.184128	0.074673	0.240818	0	1.14899	0.337393	1.59512	0.975072	2.37957	1.37799	0.0819498	0.0464219	1.1678	1.13423	0.78648	0.352889	0	1.30787	1.26149	0.147879	0.203426	0.265879	1.22443	1.62048	0.285616	0.64074	1.67407	0.525691	0.371382	0.680342	0.258108	0.780257	0.740961
AL022328.3	0.209538	0.913512	0.384861	0.892972	0.311405	0.24524	1.0532	0.435118	1.11869	0.401063	0.40136	1.18453	0.291286	0.32178	1.08485	0.748127	0.626413	0.317553	0.375502	0.586715	1.19439	0.350726	0.703459	1.04755	1.32557	1.18898	0.255565	1.23712	0.677206	0.379274	1.43693	0.433532	0.434403	1.0437	1.1781	0.111799	0.346034	0.422117	2.02939	2.21355	0.226726	1.27157	3.29061	0.510981	0.894954	0.835815	0.50177	1.91713	0.518987
AL022328.2	0.64222	1.42348	0.944224	3.5282	1.29399	1.35296	2.16027	6.00123	2.67044	0.664849	0.851637	3.08792	1.48012	0.955886	2.38911	2.97644	1.83869	0.875949	0.651901	0.198058	3.08731	0.94716	2.02574	3.92074	4.19392	5.26199	0.46833	0.949474	1.77224	1.08469	1.4982	0.778378	0.691311	2.59342	6.11555	0.296529	0.734241	1.43948	5.60928	4.29808	0.824715	3.34052	5.30383	0.858354	3.09981	1.33012	1.70795	5.94539	2.22867
AL022328.1	0.396866	0.973234	1.12756	2.62442	0.368626	1.18444	0.897645	1.4422	1.04285	0.249249	0.833272	1.77878	1.43731	0.594215	1.49433	1.50552	1.15677	0.571373	0.824347	0.416715	1.69664	0.724666	0.951681	1.11604	1.3786	2.55756	0.132011	0.486071	1.26125	0.890125	1.47808	0.52109	0.749299	1.17046	3.40676	0.198513	0.557081	0.385469	3.1862	3.14435	0.644129	2.62339	3.68552	0.544387	2.24344	0.867625	0.980053	3.19462	1.26381
AL022323.1	0.512083	0.526618	0.785054	1.55116	0.386653	0.5046	0.282297	0.480231	0.967348	0.248988	0.0657159	0.312161	0.717905	0.547933	1.66771	0.530803	0.51852	0.195266	0.411743	0.719029	0.477644	1.09717	0.0237672	0.165166	0.235126	0.36154	0.329683	1.26993	0.544548	0.479697	0.650378	0.449562	0.726501	0.896415	0.268674	0.178475	0.687439	0.727347	1.49671	0.0296327	0.321728	1.00959	7.09395	0.332333	0.298813	0.661443	0.949362	0.104632	0.385761
AL022322.1	0.132381	3.11111	0.364718	2.61166	0.651694	1.01096	1.91853	4.05472	2.05402	0.118773	0.204806	1.76398	0.639251	0.304938	2.66364	0.787747	0.979487	0.331026	0.291149	0.101092	2.57246	0.589202	1.34916	2.30258	3.35358	4.1368	0.209164	0.723379	2.12495	0.500068	1.36172	0.300231	1.45554	1.13223	3.32939	0.211895	0.404439	0.457171	3.8337	1.8998	0.276248	1.07591	3.71808	0.726356	2.90604	2.20866	0.58448	4.41969	0.889968
AL021878.2	1.14899	1.21451	0.368403	1.31002	0.485774	0.54254	0.677087	1.39865	0.832885	0.127971	0.262699	1.61262	0.808768	0.328554	0.923074	0.671929	0.746201	0.324238	0.29046	0.317687	2.2543	0.515461	0.114011	0.841821	0.80564	1.6765	0.395372	0.134379	1.74146	1.65567	1.18049	0.227005	0.686443	0.654362	1.43203	0.142691	0.392576	0.10262	1.72676	0.355369	0.330713	0.515215	3.98448	0.289855	0.716702	0.328235	0.462524	2.13316	0.714962
AL021707.8	2.59156	2.11842	0.446244	1.02826	1.73315	1.00093	1.64995	2.69076	2.07539	0.372025	0.458216	2.13474	0.910131	0.716355	1.21976	1.1566	0.852219	0.235648	0.12666	0.296855	2.9813	0.414059	2.23723	0.755772	1.84439	3.02508	0.344816	0.878973	1.95432	1.34607	2.20616	0.371209	0	1.73245	2.18561	0.103704	0.684756	1.56622	3.56676	3.8741	0.961416	1.12334	9.39186	0.947967	4.88327	0.834936	0.775733	4.3774	1.19206
AL021707.6	1.44884	2.21075	0.864859	2.68268	1.22015	0.474797	1.327	7.28751	1.49868	0.415971	2.04937	2.71452	0.636026	0.355989	1.54569	1.58061	0.952888	0.497693	0.755314	0.590083	2.19228	0.771617	6.57804	3.66188	5.17201	3.47638	0.578322	0.910002	1.87301	1.04899	2.02137	0.691764	0.386185	2.3549	5.9349	0.231908	0.669938	0.875614	4.24657	6.46873	0.851029	2.88887	4.55056	1.11883	3.27607	2.31168	0.607158	3.97677	0.991114
AL021707.3	1.10989	0.956306	0.371898	1.7853	0.668704	0.252779	0.934802	1.9933	0.720675	0.129185	0.119336	1.61339	0.592578	0.248753	0.868298	0.348077	0.403543	0.409143	0.351859	0.274887	1.17515	0.472425	0.388438	1.38719	0.853947	1.40061	0.269408	0.847839	1.1052	0.807362	1.72369	0.77341	0.159913	1.62783	1.89737	0.144044	0.386394	0.660409	2.30508	1.18384	0.292119	1.28725	1.95679	0.32918	1.89919	1.49107	0.646494	2.18506	0.222892
AL021068.1	2.89793	0.212773	0.19721	0.298356	0.464202	0.109672	0.244218	0.25224	0.20845	0.0373658	0	0.378373	0.125693	0.815434	0.343033	0.0309781	0.0311258	0.14201	0.127216	0.397545	0.145673	0.130704	0.0249673	0.0433766	0.158784	0.0759592	0.155849	0.039237	0.291631	1.04471	0.295446	0.0497118	1.22572	0.368483	0.12544	0.0624957	0.326687	0.224727	0.0995116	0.311289	0.217268	0.0902615	0.801813	0.380852	0.568946	0.239601	0.311656	0.137394	0.20262
AL008582.1	0.214595	0.61396	0	0.378423	0.15946	0.0753476	0.143816	1.55966	1.07408	0.115521	0.521713	1.35176	0.259063	0	0.429262	0.22347	0.352842	0.227651	0.157322	0.0819374	0.633849	0.195922	1.13211	0.93873	0.981805	1.09591	0.0356908	0.161742	0.462366	0.329319	1.59847	0.0512302	0.238332	0.675089	2.13298	0.128809	0.0708769	0.602138	1.06653	2.3739	0.398052	0.651129	3.49964	0.261656	1.98137	1.23459	0.0642349	1.18936	0.341686
AFDN-DT	0.220864	0.615482	0.463285	0.637327	0.566954	0.408893	0.417139	0.972864	1.00496	0.151322	1.18928	1.58582	1.22518	0.157252	1.06316	0.507787	0.942387	0.517289	0.745801	0.682315	1.26103	0.747005	1.35778	1.60607	1.83725	0.468747	0.327261	0.847466	0.943094	0.597291	0.405948	0.728587	0.517347	1.35804	1.31838	0.682945	0.265263	0.615394	1.22818	0.492251	0.242084	1.54918	1.80093	0.220336	0.605343	1.00729	1.19602	0.519318	0.369429
AF131215.5	1.21478	1.10963	1.00236	1.64977	0.554327	1.50287	1.19659	0.474039	1.04057	0.0438889	0.162171	4.06503	1.46561	0.416919	1.22602	0.283811	0.270541	1.66801	1.01609	2.07324	2.57796	0.70341	0.117304	1.06993	0.190649	0.951677	1.13901	0.783475	1.29112	1.03942	0.98034	0.0934244	0.804059	1.74086	0.604089	0.34256	1.05018	0.39066	1.41196	1.2724	0.124763	0.657317	10.1492	1.61042	0.636008	0.562858	1.25926	0.426043	0.588489
AF129075.1	0.318559	0.903265	0.287979	0.605643	0.532605	0.482357	0.460337	0.537473	0.926768	0.10718	0.396033	0.752489	0.3802	0.137587	0.815273	0.604229	0.392836	0.325871	0.262731	0.387706	0.594271	0.259029	0.286463	0.423031	0.526304	1.45254	0.278155	0.337641	0.694947	0.535869	0.847453	0.313704	0.159208	0.869049	1.29532	0.812654	0.295916	0.335195	1.05041	0.571455	0.193888	0.673153	5.24921	0.436972	0.877881	1.15461	0.375459	1.32418	0.634027
AF127936.1	0	0.725141	0.1175	0.300832	0.50706	0.479189	0.320119	0.236167	0.341543	0.41632	0.301631	0.859678	0.464314	0.282934	1.07593	0.162423	0.081599	0.268877	0.133403	0.130275	0.912301	1.85344	0.458176	0.142144	0.300637	1.22799	0.226983	0.18001	0.308754	0.386653	4.5746	0.130324	0.0909433	1.23434	0.411065	0.764575	0.991665	0.294571	1.77397	0.285625	0.0632875	0.414099	3.09121	0.249609	0.668621	0.28266	0.428942	0.180095	0.9175
AF117829.1	0.257805	0.580393	0.362411	0.371708	1.10937	0.358367	0.548061	1.07069	0.837673	0.134232	0.70896	0.589778	0.421617	0.400119	0.434139	0.364033	0.380931	0.41696	0.390391	0.26384	0.814039	0.652578	0.550311	0.60217	1.02266	0.961994	0.326852	0.305798	1.12823	0.431051	1.71795	0.339005	0.306974	0.902427	1.70704	0.517509	0.425044	0.415967	1.2215	0.507958	0.329254	0.632018	12.1534	0.575864	0.554268	0.837392	0.324489	1.05407	0.614608
ADNP-AS1	2.79676	1.92372	1.28617	2.18777	0.798333	0.898156	1.25144	2.3018	1.71564	0.789499	1.74129	2.75163	1.08925	0.942776	1.818	1.21774	1.19296	1.73673	1.00016	1.6018	1.35205	1.41293	1.22682	2.08877	2.25397	1.96573	1.70176	0.886874	2.08334	2.40364	2.43165	0.903795	0.86365	2.3538	1.60258	2.70235	1.75732	1.4576	2.03412	1.43781	0.782901	1.8406	7.18447	1.24759	2.42931	2.44884	2.52678	2.18737	1.37576
ADIRF-AS1	1.27612	3.8983	0.824014	1.68412	0.977886	1.2457	1.06165	3.23818	1.14391	0.621821	1.3713	2.05092	0.876524	1.0073	1.67956	1.63002	1.92639	0.682716	0.798431	0.352838	1.50583	0.804131	3.22105	6.31102	4.79826	3.2906	0.666911	1.31836	3.02389	3.19464	1.58035	1.65849	0.645104	1.84287	4.04081	0.396197	0.585894	1.18249	3.01237	2.70362	1.49218	1.75243	2.21268	1.07644	1.91227	2.24428	1.93379	3.55813	1.33416
ADAMTS9-AS2	0.0196732	1.31332	1.48601	1.08413	0.501907	1.5542	0.639445	0.635483	1.94637	0.468336	0.35654	3.06631	1.4581	0.0362536	1.34572	0.407785	1.2586	1.56228	0.413448	1.45727	1.50267	1.36656	0.405715	1.42339	1.11565	1.01106	0.780914	0.598055	1.67997	0.97384	0.518707	0.62934	0.734136	0.972179	2.86006	1.4774	0.638941	1.01344	1.2811	0.501919	0.459188	1.805	15.7861	0.367809	3.92202	0.591567	1.84319	2.1011	1.75416
AC254562.3	0.350743	0.675814	0.36237	1.49105	0.195471	0.422233	0.302218	2.18501	0.48904	0.350652	0.764116	0.874036	0.511408	0.48476	0.7075	0.894486	0.404439	0.36449	0.624466	0.459161	1.05157	0.308787	1.80231	1.15855	1.22263	1.27943	0.325007	0.736424	0.744915	0.443615	0.586502	0.322969	0.36728	0.79799	1.6752	0	0.148943	0.584007	1.29302	0.943783	0.557652	0.977357	0.885231	0.229104	0.481517	0.518882	0.292468	1.50755	0.212749
AC253536.6	1.40679	0.789377	0.418783	1.00913	0.345497	0.326506	0.311601	0.742697	0.608647	0.205371	0.189714	0.79719	0.439622	0.494317	0.404011	0.191545	0.34215	0.281854	0.419524	0.0819374	0.800652	0.408171	0.137226	1.66885	2.42421	1.25247	0.0951755	0.512182	0.755198	0.861295	1.04027	0.239074	0.254221	1.37831	1.93907	0.171745	0.283508	0.339667	1.77755	1.49705	0.265368	0.620123	7.06408	0.392484	0.593063	0.559683	0.363998	1.88788	0.354341
AC253536.3	0.368298	0.104213	0.468316	1.57371	0.631554	0.507313	0.541113	0.294151	0.850797	0.0915061	0.0375687	2.67686	1.84687	0.156622	2.02015	0.151726	0.279491	0.61826	0.207694	0.259615	2.00833	0.581973	0	0.566539	0.115215	0.537386	0.395797	0.800737	1.00718	0.782575	0.994846	0.0405802	0.2643	0.96923	1.02398	0.0340105	0.477212	1.24744	1.59215	0	0.157652	1.21574	12.5515	0.362708	2.85067	0.664999	1.17027	2.06367	0.872109
AC245884.8	0.467069	1.58593	0.204157	0.689009	0.720832	0.567675	0.668171	3.95419	1.99609	0.135387	0.786126	2.8986	0.733406	0.148969	0.570723	0.769664	0.870003	0.686058	0.0526789	0.185197	1.22319	0.30752	3.72194	3.23313	6.66644	2.72601	0.41231	0.345263	0.975382	0.979723	1.96893	0.360241	0.359123	1.52585	2.95429	0.15096	0.462794	1.13996	2.86387	2.93252	0.449844	1.26146	8.78886	0.591402	1.90914	2.25718	0.290371	2.81624	0.362308
AC244197.2	0.0482702	0.443899	0.0748055	0.414965	0.591828	0.10169	0.727861	2.50589	0.616081	0.0779548	0.0640103	0.210502	0.0794628	0.033357	1.00532	1.48645	0.324683	0	0.141549	0.110584	0.472751	0.429682	0.729235	1.29709	1.00607	0.704314	0.0240845	0.191003	1.04523	0.0683776	0.796153	0	0.482485	3.84375	1.0468	0.115895	0	0.250048	4.15214	0.822611	0.0335762	1.06708	3.54238	0.308994	0.382013	0.966414	0.0866927	1.10834	0.128096
AC243964.2	3.1996	0.874859	0.149734	0.560295	0.434917	0.234863	0.280177	0.324105	0.167399	1.26031	0.384378	0.956143	0.286301	0.292756	1.29868	0.806031	0.219966	0.233156	0.490382	0.0766213	0.332758	0.183211	0.529331	0.278675	0.861432	1.51281	0.300377	0.315099	0.994446	1.4608	0.688062	0.111782	0.163437	0.276189	1.00737	0.281054	0.209882	0.129939	0.396376	0.759958	0.744453	0.724861	0.939352	0.530139	0.378126	0.985168	0.350393	0.953311	0.721873
AC243960.1	0.0658687	1.46723	0.317577	0.43558	0.575109	0.404732	1.09255	1.80094	0.956083	0.366406	1.47035	1.10112	0.383132	0.500702	0.844811	0.685928	0.433211	0.419258	0.241445	0.276653	0.675828	0.94716	0.773968	2.05813	0.881756	1.85812	0.208147	0.446811	0.986349	0.349901	3.87839	0.157248	0.204833	2.69379	1.98396	0.869818	1.14215	0.611337	4.25575	4.09622	0.30545	0.742339	2.11855	0.662589	0.558524	1.15201	0.492914	0.990899	0.594313
AC234775.3	0.506065	0.47277	0.672223	1.17925	1.12813	1.04074	0.581401	1.00083	0.97699	0.181617	0.095869	1.36618	1.06318	1.39886	1.46315	0.301139	0.216125	0.503986	0.459334	0.331247	1.32618	0.709545	0.27738	0.210833	0.441014	0.35162	0.673338	0.735604	1.26171	1.36547	0.948798	0.241625	1.18832	0.852865	0.609704	1.35969	0.931232	1.21713	0.856801	0	0.60345	0.877436	5.96047	0.66112	1.85266	0.366012	1.25513	0.496086	0.869726
AC234582.1	0.675123	0.530165	0.250787	0.912963	0.760955	0.327603	0.671048	1.19715	1.11624	0.269513	0.110651	1.3563	0.469532	0.314523	0.642657	0.453649	0.319749	0.462138	0.344789	0.364944	1.13915	0.337622	0.469311	1.32732	1.07973	0.841188	0.461754	0.325889	0.946319	0.359975	0.968634	0.554141	0.242632	0.760649	1.85068	0.100171	0.405876	0.756428	1.40942	1.74179	0.126636	0.858188	1.89685	0.332971	1.30358	1.06834	0.258851	2.24626	1.09509
AC232271.1	0.646314	0.785339	0.336877	0.954908	0.27907	0.613326	0.877991	3.11949	0.410921	0.188068	0.40923	1.59124	0.452426	0.426515	0.974258	0.945898	1.02352	0.402382	0.179283	0.133393	1.06449	0.518309	0.879648	1.62285	2.46268	2.4638	0.273091	0.394971	1.449	0.795945	1.55518	0.0667218	0.325922	1.39441	2.6938	0.30057	0.548089	0.633409	2.17706	1.88012	0.210609	0.916171	2.84869	0.681558	2.27112	1.24614	0.5647	3.10726	0.574805
AC156455.1	0.0518028	0.688112	0.5352	0.548103	2.20375	0.409247	1.56226	2.15143	2.3465	0.213797	3.53778	2.67324	2.64931	3.61562	0.871652	0.423855	0.874983	1.80565	0.607634	0.138457	0.660359	1.93319	1.76396	3.61493	4.81912	0.95742	2.56748	1.20061	2.3718	0.721588	2.63675	1.18722	0.161092	0.987976	1.95037	0.19693	1.85639	2.87355	1.24768	4.07333	1.50139	1.3585	2.53442	2.54232	5.74935	2.65842	0.527211	0.779298	0.614036
AC148477.4	24.7575	0.518914	0.118418	1.23605	0	0.232178	0.0265895	0	0.0397165	0	0	0	0.0522513	0.426497	0.0497973	0.0314791	0.0316293	0.0561193	0.245619	2.27236	0.0411192	0.0120744	0.0126856	0	0.0268921	0.0128646	0.0879829	0.249197	0.0626889	10.6036	0	0.12629	0.0117504	0.0832095	0.17527	0	0.00873608	0.0456725	0.0202242	0.0632648	0.0122657	0.103187	0.119821	0.0483764	0.0199361	0.0243476	0.601723	0.265271	0.0748716
AC145423.3	0.541619	1.2867	0.0349733	1.07449	0.339578	0.106971	0.680584	2.88205	0.406633	0.109337	0.179558	1.23018	0.312066	0.748568	1.48173	0.725166	0.45539	0.277026	0.347432	0.193878	0.41047	0.394047	0.340934	1.39618	1.41108	2.81537	0.168901	0.382708	1.37848	0.479522	0.540319	0.0969753	0.541375	0.718818	1.28469	0.121913	0.201248	0.263032	1.47533	0.789421	0.188372	0.74833	7.54466	0.123824	0.956786	0.934802	0.151991	2.19778	0.79052
AC145423.2	0.46301	1.70316	0.478359	0.699845	0.221176	0.139346	0.265969	2.74705	0.397276	0.0712139	0.701703	0.09615	0.217775	0.274253	0.980657	0.767518	0.652536	0.902169	0.387928	0	0.370176	0.452916	1.33235	3.30678	2.62271	0.57907	0.330028	0.29912	1.0261	0.468487	0.492693	0.757949	0.440764	0.234092	0.478142	0.0794052	0.196617	0.256979	0.682758	1.54251	1.65633	0.430064	5.93279	1.20975	0.299126	1.46126	0.0593972	3.66595	0.491482
AC145098.1	0.1457	0.446626	0.865549	1.05985	1.94879	0.460419	2.01392	3.63066	0.382858	1.05886	0.193211	2.01206	0.983398	0.85583	1.98014	0.780305	0.620688	0.695543	0.534072	0.375515	0.781435	0.823076	0.0524083	0.637356	0.333301	1.48815	0.908718	2.26494	0.753422	0.799774	3.44966	1.04349	0.825265	2.10557	0.658272	0.131183	1.33539	0.849097	2.75725	1.2415	0.506737	2.32096	2.87112	0.999297	0.658904	1.40823	1.14483	1.67273	1.04395
AC144831.1	7.94591	0.452478	0.301316	0.480188	0.7961	0.0877731	0.61628	0.308991	0.0536233	0.166613	0.0710355	0.25091	0.180287	1.13522	0.567285	0.191257	0.144127	0.156951	0.56725	0.859047	0.405275	0.0570579	0.0942007	0.171097	0.332827	0.330014	0.142548	0.423932	0.15389	1.65254	0.46235	0.4348	2.07036	0.477468	0.4195	0.0285811	0.212311	0.277491	0.423239	0.416408	0.372612	0.580489	0.889769	0.0979732	1.14396	0.312293	0.336726	0.622061	0.625481
AC139887.4	0.329802	0.512223	0.318019	0.610661	0.269574	0.555832	0.464151	0.410911	0.396171	0.213048	0.145781	0.958826	0.376426	0.243102	0.729566	0.274753	0.354939	0.359864	0.12895	0.0503704	0.820325	0.255938	0.253076	1.01676	0.402372	0.769945	0.197466	0.298288	0.511625	0.685203	0.795474	0.157467	0.322328	0.518757	0.834421	0.316737	0.217855	0.825741	1.3365	0.631064	0.2447	0.71478	11.9521	0.72383	0.596587	0.54645	0.29616	1.28822	0.536792
AC139887.2	1.18438	0.849186	0.933287	1.34076	0.570564	1.16298	0.756745	1.02129	1.29613	0.15129	0.252891	2.29069	0.958346	0.554891	1.09837	0.967578	0.774154	0.921797	0.662249	0.344917	1.80689	0.824738	0.332152	0.790322	0.591877	1.90388	0.671078	0.624117	1.17429	1.2512	2.24293	0.47444	0.735726	1.51563	1.41485	0.385582	0.56688	1.05288	1.99153	0.702209	0.321159	1.47489	8.34802	0.587438	2.00856	0.956258	1.13567	2.00266	0.585989
AC139887.1	0.608019	1.0844	0.799494	1.53519	0.616096	0.291116	1.278	0.688683	0.746976	0.0595109	0.146597	1.84803	0.727946	0.611156	1.17071	0.888074	0.793165	1.156	0.810444	0	1.0827	0.492031	0.159057	0.621756	1.29254	1.69368	0.220634	0.56242	0.678837	0.704696	1.17636	0.554217	0.441997	1.10853	1.99783	0.199068	0.547685	0.572662	2.40901	0.495777	0.461379	0.934412	19.9815	0.707661	1.6248	1.37377	0.645269	2.71339	0.528061
AC139530.1	0.655689	1.41185	1.18136	2.27374	0.570411	1.21288	1.01282	2.9058	0.852475	2.10922	0.943723	1.70867	1.41112	0.939378	1.89683	2.54803	1.00399	1.45418	1.73518	1.24568	1.46185	1.04031	3.2789	3.55785	2.90232	2.70682	0.41493	1.42835	0.945851	0.741925	1.53159	1.4546	0.991084	1.6791	2.83233	0.14399	1.11715	0.61097	1.95342	2.68236	1.22365	2.36037	1.26056	0.994478	1.02156	1.45738	1.87412	1.94998	1.37504
AC139100.2	0.979076	1.05409	0.345401	0.757989	0.452486	0.301846	0.672154	7.43819	0.932278	0.102841	1.64667	2.04805	0.440286	0.330043	0.505777	1.30021	0.44975	0.369135	0.175066	0.191476	2.89561	0.555951	1.2369	2.17876	1.9423	2.05576	0.667235	0.431962	0.81808	0.778028	1.21972	0.20523	0.159128	1.52124	1.63991	0.344009	0.260275	0.556659	2.16367	1.32796	0.29899	0.5279	4.21889	0.0873504	1.4039	1.51672	0.42888	1.58821	1.14067
AC138956.2	1.28743	1.10134	1.02078	1.22754	1.43499	0.819976	1.65538	1.05694	1.61845	0.322351	0.0397033	4.74395	2.0701	0.703466	1.96582	0.587938	0.993522	1.2251	0.131697	0.480141	3.5467	0.738047	0.086156	1.2723	1.97862	1.8785	0.687183	0.575439	2.72875	2.01458	2.07088	0.214429	1.03747	2.43713	2.00199	0.395372	0.741657	2.59786	3.15919	1.12789	0.249914	1.98563	11.393	0.766632	4.70514	1.32289	0.914131	4.9782	1.7162
AC138956.1	1.12918	0.499973	0.324058	0.746709	0.454493	0.594708	1.00899	1.10727	1.22454	0.168851	0.041594	1.7782	1.07401	0.476859	0.885779	0.503947	0.703265	0.570419	0.183958	0.251502	1.57986	0.322163	0.0451293	1.25448	1.05237	1.69336	0.250402	0.248228	1.15564	1.35517	0.901175	0.0898561	0.459829	1.14708	1.4738	0.564817	0.404027	1.38109	0.899356	1.1816	0.261814	1.30521	7.16129	0.458936	2.12771	0.909484	0.64783	2.13577	1.53156
AC138932.5	0.505423	1.37716	0.522177	0.519911	0.469459	0.325346	0.479854	1.10785	0.295134	0.120925	0.446821	0.326534	0.295833	0.465694	0.753305	0.501262	0.402922	0.102128	0.16468	0.0643274	0.838101	0.307629	0.5252	0.596602	1.14192	0.983287	0.0560403	0.44443	0.907486	0.99439	0.896373	0.0402198	0.898125	0.629373	1.06563	0.168542	0.306042	0.654544	1.41699	0.906664	0.195314	0.438161	8.3188	0.308131	0.603166	1.35696	0.201718	1.1116	0.268251
AC138696.2	0.496231	0.347688	0.65916	0.750058	0.15803	1.04541	0.498841	3.09135	0.85156	3.20559	4.41829	1.44268	0.700199	2.64537	0.850824	2.78414	0.953665	1.99826	3.74185	0.812025	0.793471	0.873742	1.63194	3.36684	1.29733	2.37903	0.848897	0.8816	0.549863	0.70294	1.20696	1.11695	1.03926	1.50533	2.56224	0.595717	1.54531	1.28528	0.731745	5.21388	3.05724	0.921842	0.385361	1.16689	1.04191	2.05552	0.57293	0.898053	0.225748
AC138207.5	0.502471	5.1658	3.79362	4.80523	3.66193	3.86778	8.93662	5.9394	2.26345	2.82975	7.63702	5.95566	2.59604	2.61759	5.94879	6.03751	4.36774	4.21747	3.96702	2.16944	6.41729	4.20813	5.67239	7.77761	4.95143	9.19267	1.81281	5.50594	3.29783	1.8342	12.5033	4.37373	3.65737	7.52357	4.05135	3.20164	3.79148	2.35261	11.7918	15.3926	2.25839	8.24293	28.1549	3.11044	3.4522	10.6737	1.77015	4.65165	5.74397
AC138207.4	0.190349	1.5871	0.707972	1.35945	0.85927	0.461158	2.55453	0.948649	1.02895	0.573827	0.618425	2.86383	1.22835	1.40748	2.48615	1.02792	0.938929	0.484633	0.795416	0.588706	2.57444	0.742935	1.05441	1.32037	1.75143	3.18012	0.408392	0.774724	1.42724	0.748253	2.97751	0.408978	0.799107	2.13328	2.85518	1.01687	0.971325	0.628601	3.8205	2.64633	0.489897	2.53715	13.9432	0.661465	1.30199	2.83851	0.666636	2.33603	1.67705
AC138028.4	0.0771146	1.20819	0.593105	3.08235	0.668523	1.03792	1.13696	1.37002	1.10645	0.138375	0.10226	2.69032	0.874521	0.130264	2.01439	0.963645	0.768446	0.397345	0.477393	0.402404	1.93408	0.621906	0.3082	1.76698	1.62032	3.11301	0.162456	0.649026	2.30396	0.455156	3.02704	0.270006	0.239804	1.42523	2.74077	0.267439	0.382044	0.743452	2.76142	1.42945	0.25032	2.44011	5.21668	0.47013	1.93743	2.59092	0.854064	5.72576	1.34608
AC137932.1	0.214041	0.14997	0.852956	1.37498	0.374901	0.773005	0.67624	0.761947	0.550961	1.4156	0.0810962	2.04463	1.16781	0.802955	2.00765	1.52841	0.603312	0.750702	0.313832	0.245178	1.62569	0.649063	0.219973	2.5223	1.21243	1.20462	0.213593	0.380265	1.14635	0.801321	1.0412	1.09496	0.652024	0.793588	1.04992	0.256954	0.333272	0.79198	2.06911	1.26159	0.0850769	1.43144	14.0456	0.782944	1.69394	1.13993	0.658998	1.54945	1.23339
AC136475.2	0.161311	3.70859	3.08318	5.06696	1.84294	3.35585	2.02699	2.59603	1.93773	1.60649	1.4439	6.50705	2.92107	0.891789	3.53046	1.9438	4.19548	4.43704	3.48863	1.52441	1.88078	2.73379	4.00362	6.85483	7.87225	4.17782	1.2073	2.82676	4.87454	0.828337	7.68145	1.44412	1.34366	3.90113	7.28801	1.5008	2.47744	1.72347	5.82782	8.97053	2.52464	4.71973	2.19223	4.20418	2.82681	2.00458	3.54898	10.4731	3.68146
AC135050.6	21.7053	21.9988	11.9037	13.3301	7.20197	13.3038	10.0059	26.0968	16.233	13.8908	16.083	12.6754	10.1618	22.1667	8.66587	15.5664	18.3599	13.595	16.7095	8.83851	13.4581	14.5761	13.3282	26.9974	29.1899	22.7917	9.95349	10.071	19.3147	18.5133	19.4031	18.75	9.97689	14.8011	19.5373	21.3124	7.35536	9.93846	17.3396	23.2944	14.8943	10.8224	21.8817	17.6308	9.78746	19.1136	10.3277	27.0862	11.0539
AC135050.5	3.37714	2.14183	0.451175	1.7712	1.00595	1.10399	1.25845	1.39047	1.31145	0.313446	0.0386066	1.90441	0.99687	3.09827	1.54155	0.415779	0.731085	1.00595	0.853728	0.20009	2.66122	0.598049	0.20944	1.12799	1.15438	2.03901	0.522939	1.02034	2.35228	3.09305	1.8278	0.333609	0.698404	1.09904	2.47282	0.59415	0.432702	1.69663	2.50428	0.626706	0.162007	1.17361	6.2513	0.425974	2.4357	1.96971	0.732018	3.18102	2.00873
AC135050.3	0.457707	1.8995	0.400129	1.39696	0.66714	0.370864	1.02641	8.84653	1.37454	0.568601	2.05432	1.89366	0.46368	1.26519	0.845139	1.38277	1.38936	0.704321	0.722721	0.12099	1.83906	0.675036	4.25522	5.76459	5.19045	3.80157	0.491881	0.437855	1.93442	0.324185	2.51018	0.504315	0.234616	1.57834	3.1814	0.169068	0.209316	0.866327	5.24951	4.29482	0.930636	1.41931	3.44508	0.837124	1.79126	4.37525	0.822036	3.23369	1.15857
AC133552.5	5.35831	0.94377	0.825802	1.99682	0.42896	1.65271	0.714231	3.38108	1.33355	5.2909	1.53103	2.23774	1.13063	2.20943	1.08682	2.35175	1.30096	1.91122	2.43073	1.22077	1.13213	1.52032	3.32233	5.51301	3.28072	2.03018	1.35892	0.903663	0.975904	1.27904	0.756042	3.01068	2.72234	0.942943	1.819	0.106617	2.11197	1.03513	0.814877	4.46088	3.62421	1.80933	0.643712	1.29946	0.602453	1.10364	1.43554	1.73451	0.754184
AC132872.3	0.477522	2.52695	0.623181	3.32398	1.70881	0.900098	2.93073	2.60948	0.566071	0.189413	0.266625	2.00937	0.728177	0.382094	2.05827	1.86196	0.788909	0.434208	0.221101	0.431832	4.33686	0.5507	1.22947	1.79047	4.98273	3.26375	0.40128	0.852422	2.55051	1.08586	3.61043	0.359996	1.20583	1.95684	5.08701	0.120686	0.522957	1.23682	4.15082	3.87731	0.314677	2.58189	1.98103	0.735466	2.61414	2.35974	0.631933	4.05944	1.33391
AC132872.1	1.36257	3.79561	2.39179	3.79666	1.69568	1.68608	2.65969	5.08204	2.32406	2.53522	1.43849	4.24983	1.9861	1.09701	5.30489	4.13279	3.35759	1.23898	2.6961	2.62152	2.04831	1.8479	5.97656	3.8028	5.48752	4.20791	0.805268	2.66217	3.8992	1.94891	4.13862	1.87592	1.35755	2.93395	7.00478	1.41341	1.62536	1.59327	4.18758	7.00062	2.83417	5.72845	4.06306	2.10496	3.48482	3.5801	2.39965	5.44656	2.71017
AC132192.2	0.620211	1.75754	0.256308	1.18484	0.230432	0.159695	0.249389	1.65996	0.869192	0.163227	0.877281	1.62281	0.308568	0.361925	0.583826	0.528991	0.593318	0.375969	0.383954	0.0631497	0.501367	0.405808	1.38811	3.0662	2.22801	1.56859	0.275071	0.358384	1.05123	0.390474	1.61326	0.177675	0.257157	1.64218	1.51936	0.198548	0.191189	0.446222	1.86526	3.51081	0.172565	1.00366	3.97087	0.453735	1.10634	1.37017	0.482686	3.38287	0.30723
AC129510.1	0.113935	0.977911	0.529704	1.09248	0.698464	0.540059	0.486771	5.32333	0.940935	0.153335	0.151087	1.5734	0.487658	0.354305	1.32723	0.610184	0.766369	0.518002	0.459398	0.358901	1.54095	0.487599	0.245894	3.77361	3.79369	2.61833	0.198968	0.547444	1.49132	0.322792	1.5458	0.285597	0.721265	1.51211	2.00755	0.307749	0.225784	0.553316	2.15612	3.01468	0.158504	1.22231	5.65162	0.833528	1.32033	2.08444	0.588299	2.02972	0.997765
AC129507.4	0.0731875	0.314086	0.151227	0.290387	0.244727	0.0770917	0.331076	0.379945	0	0.0393985	0.339684	0.159582	0.0963854	0.303456	0.0775056	0.0653265	0.0656381	0.133098	0.160963	7.29357	0.170664	0	0.0526509	0.0457362	0.14882	0	0	0.0413714	0.0946138	0.18143	0.0778793	0.209664	0.0487697	0.0431697	0.859715	0	0.108776	0.0947809	0.16788	0.196934	0.152725	0.0951716	1.79032	0	0	0	0.0657219	0.115895	0.310752
AC129507.3	0.207779	0.488305	0.715554	1.69461	0.347389	0.984883	0.452555	3.48767	1.01397	0.671111	0.826595	1.08229	1.41379	0.717924	1.00239	1.12822	0.993845	1.07061	1.49786	0.53551	1.9542	1.00778	1.49476	1.60142	2.34134	1.7685	0.311014	1.15496	0.761055	0.760355	0.423773	0.818448	0.576904	0.919189	1.12649	0.187076	0.325972	0.291506	1.4894	1.24243	0.843082	0.743027	2.72961	0.570026	0.685155	0.717228	2.05242	1.23384	1.34171
AC127502.2	0.766554	1.86333	1.38941	2.31223	1.42402	1.56531	1.83859	7.56799	2.89774	0.796348	0.802511	5.17071	1.43902	0.799234	2.10778	1.2544	2.05642	1.36347	1.28168	0.308093	1.24812	0.966901	1.83819	4.19365	5.49651	4.40526	0.838757	1.24674	3.58575	1.18112	3.25563	0.288946	0.797575	1.87207	6.64706	3.18854	1.33252	2.50793	4.54239	2.08678	1.24415	2.56198	5.17221	0.799381	3.39818	3.76018	1.39484	4.48277	1.77013
AC127024.5	0.444828	2.853	0.813091	1.94597	0.877203	0.468558	1.54789	5.04488	1.69552	0.552602	0.816754	2.13882	0.608355	1.27688	1.83598	1.77145	0.797886	0.964526	1.05358	0.627123	1.7554	0.984063	1.03387	2.99364	2.08734	3.64467	0.751207	0.580274	2.03481	0.654361	1.89338	0.392099	0.547234	1.81649	3.15372	2.17711	0.474661	1.15214	2.86486	3.25324	0.19041	1.95782	15.6246	1.0639	1.58611	2.50404	0.798905	2.98015	1.16229
AC127024.4	0.153979	1.32161	0.318166	0.678827	0.51488	0.324386	1.3931	2.45138	0.69362	0.16578	0	1.41759	0.709747	0.141876	0.978383	0.778827	0.828574	0.466706	0.225767	0.293964	1.91498	0.351451	0.960024	1.34714	1.72205	4.34365	0.307312	0.174082	1.36023	0.21812	1.69312	0.220556	0.684043	1.211	1.94789	0.554547	0.406852	0.864106	2.17808	2.76219	0	0.600694	18.2752	0.657113	1.33465	1.55912	0.230453	3.00724	0.817236
AC125494.2	0.577479	1.15062	0.770637	1.71845	0.670485	1.5714	0.411199	3.5975	0.433557	0.388587	1.46775	1.18922	0.728832	0.73162	1.0872	2.06181	1.07898	0.918921	1.69342	0.5788	1.32416	0.840273	1.83485	1.80439	2.73991	2.98422	0.192089	0.979312	1.66417	0.494229	1.2034	1.61987	0.513084	0.96511	1.65239	1.18431	0.500669	0.654378	1.6834	1.98552	1.6737	0.844811	2.289	2.9045	1.08814	1.59471	0.950716	1.7146	1.20044
AC124798.1	10.4348	2.58851	2.71926	4.00317	0.617293	3.09009	0.540194	5.54522	2.45359	1.71205	4.00653	2.30356	1.60315	5.02455	1.31235	3.4897	3.38832	2.35338	4.10833	0.326613	1.5446	3.00373	4.01571	5.27703	4.17004	3.85638	1.26947	1.69859	4.2461	2.83513	0.326753	8.67892	2.86468	2.03765	2.88366	2.44875	1.58648	0.191732	2.54073	2.38042	2.94452	1.33339	1.57981	5.17485	0.241775	2.86947	2.009	7.5282	0.44236
AC124319.2	0.0436589	1.57677	1.13586	0.892377	0.411421	0.643831	0.945598	2.37365	0.697277	0.854639	0.41053	1.02697	0.567133	0.148109	1.10683	1.36039	1.13907	0.783148	0.936925	0.531925	1.63631	0.391352	0.639583	2.62415	2.58661	1.48833	0.265365	0.7	1.10315	0.466652	1.00095	0.972151	0.491934	0.838119	2.35983	0.209647	0.31068	0.755582	1.54316	0.975422	0.380988	1.21288	7.10915	0.493619	1.96093	0.504178	0.71639	2.26261	1.42823
AC124312.5	0.648856	1.22956	0.54848	0.780144	1.57794	1.86401	0.711566	1.10241	1.32858	0.444556	0.547551	0.857457	2.75777	0.733729	2.54033	0.579163	0.476121	0.375455	0.432439	1.01352	1.9257	1.69641	0.424351	1.17958	1.25941	1.46316	1.17726	0.73357	1.56325	3.4259	1.12983	0.0844915	1.65089	1.46133	1.27921	3.89471	0.292235	1.14586	0.947142	0.634891	0.246183	0.690349	40.5628	1.51038	0.266758	0.162893	2.8074	1.12089	1.44013
AC124312.4	0.152985	0	0.316113	0.337224	0.341039	0.698302	0.410107	0	0.45943	0	0	0.444771	0.772327	0.28192	1.08008	0.0910356	0	0.0927391	0.07477	0.17524	0.523222	0.872959	0	0	0.259234	0	0.203553	0.230612	0.560358	1.26416	0.37985	0.0730443	0.407778	0.421114	0.184316	0.55097	0.353699	0.330205	0.40941	0.457394	0.21283	0.132626	19.5434	0.279803	0.0576541	0.0704117	0.641106	0.403762	0.433047
AC124312.3	0.268591	0.282285	0.436063	0.55822	0.727053	0.538894	0.231432	1.22172	0.268868	0.041311	0	0.650724	0.62323	0.194448	1.02037	0.114163	0.298239	0.314007	0.281295	0.439519	0.501055	0.849511	0.0184022	0.367666	0.403113	0.354579	0.459476	0.520557	1.16568	1.0599	0.626059	0.109921	0.613646	0.558273	0.577852	0.138188	0.177422	0.463782	0.660109	0.0458875	0.800694	0.465694	10.3248	0.350886	0.173522	0.423837	0.826947	0.546843	0.746709
AC124312.2	0.518311	0.453948	0.841489	0.979291	1.48556	1.3649	1.26538	1.0763	0.333544	0.239159	0.196378	1.23779	2.82791	0.409346	1.93419	0.363503	0.49805	0.774273	0.271413	0.80575	1.79568	1.59709	0.159802	0.370174	0.451686	0.810291	0.812781	0.669693	1.19652	2.85821	1.26066	0.371209	1.23352	1.61598	1.0705	1.24445	0.293467	0.479454	2.08061	0.132826	0.412035	1.011	10.6665	0.203136	0.25114	0.613423	2.62641	1.05526	1.96494
AC120498.4	11.2142	0.242295	0.204157	0	0	0.312221	0	1.53878	0.370894	0	0	0.071812	0.292771	1.16072	0.0348775	0.132286	0.443057	0	0.289734	0.056588	0.0921584	0	0.426472	0.308719	0.15068	0.360411	0	0.111703	0.223525	3.00915	0.0525685	0	0.395035	0.116558	0	0.0593058	0.293696	0	0.0566594	0	0	0	0	0	0	0.341057	0	0.469373	0
AC120053.1	1.20282	3.34472	1.77527	2.301	1.38856	2.39822	2.54784	7.04715	2.74139	2.35877	4.32939	3.52816	2.09324	2.43424	3.15414	4.33285	3.04361	1.83588	2.36196	1.89447	2.34403	2.04434	5.31545	6.30861	4.82612	4.13689	1.3289	2.25834	2.48515	1.67344	4.27405	1.75366	1.94655	2.55921	5.78367	8.74116	1.25566	1.91931	4.95154	4.9319	2.74905	3.79859	10.6836	2.67131	2.59835	3.5292	2.60387	4.14953	4.28635
AC118754.1	0	1.25731	0.882839	1.75174	0.238113	0.450049	0.429504	0.7985	1.09063	0.368003	0.793208	1.05583	0.675219	1.94868	0.90493	0.419502	0.881324	0.543902	0.626451	0.293646	0.87675	0.614374	1.22947	0.854402	1.78101	1.49619	0.554269	0.338127	1.07706	0.18157	0.7729	0.734391	0.227768	0.856861	1.38984	0.0512915	0.635019	0.497984	0.637035	0.613156	0.356633	0.722275	1.50968	0.23443	0.386438	0.82591	0.422041	0.676574	0.362824
AC116914.2	0.271624	2.13153	0.561255	1.29327	0.787163	0.228891	2.02059	4.73795	1.63142	0.350931	0.432234	2.68493	0.321947	0.900983	1.03554	1.26073	1.07186	0.592765	0.318608	0.24891	1.57081	0.371983	0.781622	2.85168	3.42438	2.5365	0.216843	0.429921	1.7206	0.538679	3.81528	0.0778135	0.289602	2.17896	3.63248	0.195648	0.592102	0.844234	5.91906	7.50378	0.377876	0.918357	5.61091	0.596144	0.921276	1.35016	0.243916	3.01087	1.03798
AC116667.1	0.119826	1.3748	0.353709	0.871632	0.20034	0.288499	0.817383	1.15526	0.295591	0.14744	0.158899	0.746503	0.23671	0.236587	1.21458	0.550058	0.660148	0.0778265	0.389031	0.352948	0.638672	0.298895	0.800453	0.845092	1.18347	1.77337	0.136657	0.319324	0.851985	0.181865	1.09292	0.257454	0.114069	0.747185	1.73239	0.637047	0.296824	0.299276	1.91421	1.73498	0.250049	0.946048	3.443	0.203502	1.14184	1.26451	0.330495	1.72129	0.42701
AC116651.1	0.0568651	0.697251	0.470001	0.300832	0.190148	0.778682	0.200075	2.06646	0.555007	0.489788	0.603262	0.289315	0.580393	0.589447	0.662422	0.786737	0.81599	0.801459	0.625325	0.293118	1.37906	0.447784	1.59544	0.675185	1.24302	1.12012	0.709323	0.450026	0.349186	0.402764	0.242042	0.773796	0.265251	1.64356	1.95256	0.477859	0.197206	0.81007	0.847853	0.612053	0.632875	0.517624	6.18241	0.936032	0.225017	0.824425	0.408516	1.57583	0.845066
AC116407.2	0.18382	1.46504	0.360835	1.2642	0.102444	0.329164	0.517402	1.25965	1.02125	0.554144	0.585024	1.30932	0.31471	0.457301	0.791639	0.557858	0.428632	0.768872	0.323424	0.31584	0.497227	0.427953	0.899228	3.81376	1.94365	1.42153	0.385212	0.290947	1.12876	0.130196	1.15406	0.315959	0.269481	0.86741	1.36201	1.01509	0.364274	0.547525	1.15954	3.39642	0.767177	0.884432	0.99925	1.27755	0.768944	3.0711	0.412672	2.50332	0.331709
AC116366.1	0.224625	0.857451	0.50355	0.902457	0.42988	0.593751	0.903224	1.33773	0.693662	0.355917	0.168606	2.02691	0.373965	0.187443	1.25073	0.904132	0.642373	0.373816	0.254779	0.18448	1.52988	0.798067	0.219525	1.36134	1.20221	2.3561	0.36795	0.474362	1.4081	0.558341	1.93926	0.16998	0.265475	1.87493	2.83392	1.05828	0.49553	0.795855	4.22409	1.20124	0.294804	1.65338	9.26168	0.294556	1.69144	1.6795	0.666029	3.38922	0.845778
AC116351.1	9.96998	0.194838	0.272052	0.558424	0.855209	0.0478226	0.657207	0.377108	0.0136343	1.80857	0.951238	0.362979	0.125561	0.276091	0.307708	0.145887	1.01794	5.30067	0.299552	0.0520051	0.533576	0.345072	0.143709	0.175904	0.553906	0.158986	0.42134	0.0923906	0.801147	7.71109	1.13531	0.0715339	1.35536	0.931931	0.196914	0.218011	1.16061	2.02845	0.536328	1.4334	3.20222	2.26706	2.28289	1.67732	2.51512	3.36629	0.505541	0.165354	3.26262
AC114803.1	0	2.05678	0.892775	3.02525	1.24646	2.35588	2.60602	0.738876	14.0439	0.109454	0.606657	10.788	3.0459	0	0.897171	0.272229	1.32205	12.156	0.596237	1.45564	2.84476	1.39224	2.34034	1.33414	1.18864	5.04343	8.16665	1.43669	1.74138	0.93607	0.432719	3.56766	0.406467	0.299828	2.93958	0.488176	5.43952	9.15017	0.64129	2.46199	0.28286	3.76769	0.55264	4.92729	6.26409	1.19315	1.23244	1.60985	5.82734
AC110792.3	0.0530487	1.431	0.219229	0.771767	0.650415	0.614664	0.693259	0.330475	0.876206	0.514031	0.844162	0.771136	0.593838	0.219955	1.31083	0.66291	0.333036	0.337657	0.388904	0.546891	0.544291	0.363245	0.915914	1.06083	0.70115	1.62548	0.899935	0.239899	0.720081	0.375733	0.395146	0.759857	0.353499	0.688398	1.53391	2.03789	0.735883	0.893103	1.09516	0.38065	0.2214	0.758818	7.06517	0.776188	0.83966	1.02546	0.285824	1.51208	0.675728
AC110285.2	0.151519	2.25419	0.626167	2.39138	0.258957	0.191522	1.78717	11.4948	0.68254	0.761284	1.23235	2.49621	0.405743	0.139609	2.53169	2.1008	1.07806	0.413326	0.296213	0.381834	2.08225	0.421921	3.37181	4.98685	4.59068	4.42165	0.110881	0.696626	0.985918	0.522281	1.01039	0.115751	0.35002	2.96721	3.90656	0.121264	0.440388	0.261632	3.69571	2.79054	0.0983685	4.12455	3.15738	0.129323	3.30046	4.36552	0.807308	6.59022	0.568288
AC109460.2	0.477729	0.65677	0.329044	1.57	0.613162	0.213485	0.611217	1.5632	0.891233	0.171448	0.0383944	1.45202	0.533827	0.560226	1.23668	0.465182	0.415467	0.315924	0.191033	0.0994954	2.17399	0.366771	0.145803	1.53794	1.32466	2.15454	0.216694	0.491001	1.3849	0.502422	1.47885	0.0829441	0.520925	1.12716	1.98832	0.0868949	0.344259	0.581184	2.27468	0.934894	0.161116	0.978908	5.07586	0.370679	1.29299	1.65906	0.337998	2.0861	0.860543
AC108673.3	1.46288	2.5459	1.46261	0.81135	1.20975	1.39179	1.28082	4.89958	1.55886	2.08306	3.19144	1.64632	0.776838	1.69573	2.69858	2.8221	2.49699	1.33018	2.21409	2.05406	0.968351	0.38775	5.49958	6.2518	7.34058	3.58044	0.612177	2.77423	2.04366	0.601621	2.51074	1.21668	0.880476	2.50513	4.77571	1.01971	1.2157	1.83337	3.35559	7.87264	1.24733	1.9023	6.15658	2.67553	0.746921	3.71395	0.72039	4.70774	2.20402
AC108449.2	1.66104	1.36949	2.60374	4.50731	4.05396	6.45559	1.95767	0.713635	1.76309	0.524171	0.911451	5.78659	5.03509	1.86032	7.68317	0.971376	1.8236	0.937471	1.3017	2.36193	7.10554	3.90238	0.535666	1.6823	0.727922	2.96686	2.42917	5.24517	2.88778	3.85398	2.77318	1.02553	2.86257	2.77037	3.98517	4.26314	1.56071	1.78023	2.56199	1.1816	0.876508	3.76135	32.7707	1.15233	3.33495	2.88662	10.5955	3.8094	4.34715
AC108134.3	0.0834536	3.4791	0.418783	2.12863	0.810589	0.703244	1.84563	1.3121	0.733957	0.436414	0.569141	2.13162	0.502425	0.346022	3.08059	1.22376	1.04783	0.368578	0.506925	0.341406	2.09059	0.612256	1.59525	1.93706	3.38177	5.81006	0.166557	1.67133	1.56434	0.447536	2.27083	0.375688	0.238332	1.2236	4.50296	0.34349	0.732395	0.385986	3.32265	3.14381	0.33171	2.62002	2.62473	0.392484	1.0109	1.1029	0.802937	2.85069	1.22754
AC108062.1	0.597092	1.44654	0.582061	0.445797	1.52427	0.253607	1.66516	3.4997	2.01004	1.0265	0.957814	5.91471	0.526347	1.51072	0.588127	0.399719	0.682332	2.25054	0.494215	0.303366	0.965656	0.685817	2.03688	2.13649	2.17858	1.67218	1.09558	0.353856	1.50644	1.11866	2.26991	0.200021	1.61078	0.69303	3.20237	0.202322	1.24528	2.03916	1.04931	2.77279	0.596199	1.89102	14.1481	0.84546	2.51514	0.518597	0.341602	1.8834	2.54034
AC108010.1	0.813988	0.928031	0.944247	3.30522	1.44847	1.5644	1.36378	1.21582	1.24368	0.138375	0.151497	4.17249	2.06876	0.493424	3.46822	0.471625	1.2039	0.921945	0.774717	0.507094	4.48887	1.64277	0.0205467	1.01735	0.827582	2.33372	0.441766	1.87281	4.3107	2.38704	3.7534	0.12273	1.0087	2.20692	1.67749	0.942892	1.41498	1.70143	3.43949	1.58828	0.456933	1.93129	17.583	1.12309	4.23005	3.03654	2.23134	3.03022	1.7584
AC107464.3	0.0643494	0.920523	1.08588	2.21277	0.119541	0.384099	0.776254	2.62796	1.44936	2.6096	2.81597	2.08908	0.338984	1.24512	1.62036	1.18704	0.884912	1.95041	1.10075	3.58724	1.84067	0.543438	0.678961	4.10174	2.79143	1.2519	0.813382	0.630507	0.7071	0.941932	1.71187	0.645208	0.628911	2.58105	2.05449	0.746754	1.40273	0.972244	4.92022	6.04108	0.238723	1.92461	2.56524	0.58846	1.28529	2.31012	1.7143	1.97005	0.774138
AC107375.1	0.59521	1.31193	0.91509	2.97077	0.876673	1.04494	1.33202	2.8104	0.797979	0.42722	0.610766	1.64804	0.863192	0.616977	1.93101	1.3282	1.45528	0.489675	1.12205	0.45453	1.82417	0.994649	1.34575	1.7358	2.77361	2.05746	0.636387	1.17761	1.69923	1.00877	2.04336	1.1266	0.679934	1.65512	2.66354	0.731553	0.702098	0.697411	1.99108	2.31342	0.552028	2.46021	3.54373	0.609104	1.09752	1.57519	1.66075	3.32131	1.09815
AC107021.1	0.176303	0.408328	0.70835	0.751336	6.41931	1.21742	0.807382	0.162712	0.853011	0.0421812	0.233792	2.335	1.67689	0.0812224	0.67767	0.0874257	0.36894	0.106874	0.258499	0.381461	1.4252	1.11332	0.0563697	0.342766	0.21908	0.685986	1.52475	0.797284	1.72204	0.846353	0.708731	0.0841774	0.234965	0.785721	0.849636	2.79847	0.756987	1.67434	0.31454	0.491968	0.163512	0.917044	17.038	0.573244	2.12613	0.324574	1.21378	1.51999	0.291113
AC106782.6	0.494015	1.0979	0.765587	1.26591	0.412977	1.00822	0.931151	3.52636	1.15904	0.897546	0.982658	2.01971	0.670933	1.15218	0.871938	1.5709	0.996878	1.37569	1.13177	0.601248	1.23838	0.676543	1.99909	2.27681	3.0136	1.757	0.985959	1.57082	1.09767	1.29026	1.74133	0.707616	0.288046	1.4934	1.78556	0.444793	1.52967	1.03963	2.0539	2.10473	1.6752	0.923462	1.76235	1.58118	1.18686	1.62002	0.998151	2.15129	1.17989
AC105206.2	0.583226	0.56457	1.07826	1.58331	0.923785	0.485004	0.555436	1.08362	1.61321	0.0660976	0.162822	1.20477	1.05107	0.1697	0.931873	0.191793	0.578125	0.502412	0.585093	0.386776	0.744425	1.02992	0.264993	1.11259	0.592966	0.671833	0.673898	0.832891	0.813495	0.521794	1.01258	0.791431	0.327278	0.977732	1.16495	0.331652	0.517057	0.71555	1.51385	1.04623	0.46974	0.758416	3.50417	1.17898	0.520566	0.805291	0.937207	1.11799	0.944926
AC105020.1	0.0430163	2.26801	0.281468	1.318	0.966921	0.422903	3.51706	1.99494	0.172243	0.20841	0.389795	6.85748	0.339906	0.128814	1.39194	0.531144	0.520818	0.462854	0.788391	0.394191	1.518	0.481097	1.37193	3.862	4.52654	0.983324	0.336254	0.737593	2.30317	0.411312	4.18069	0.14377	0.0573293	1.25175	4.36633	0.335663	0.681961	1.36485	1.4143	4.48848	1.01734	1.37979	3.605	0.668736	0.753817	3.4548	0.302589	1.24882	1.72752
AC104986.2	0.915229	1.53028	1.11749	1.70564	0.556432	1.2708	0.878222	1.29581	1.37426	1.11975	1.4895	2.05609	0.931388	1.8399	1.35105	1.37392	1.30585	0.643072	1.52491	1.09602	1.16411	1.2249	1.91538	3.63964	2.36858	3.15644	0.913309	1.45802	2.07055	0.677703	2.39049	1.54931	1.33064	2.06124	3.75908	0.849009	1.15417	1.02363	2.43337	3.20898	1.44687	2.1098	1.92224	1.21739	1.31694	2.52741	1.34488	2.04218	1.4131
AC104984.4	5.50474	0.346135	0.0729131	0.186677	0.157325	0.148677	0.0709448	0.14655	0	0	0	0.410355	0.0929431	0.195079	0.1993	0.314967	0	0	0.206953	0	0.460792	0	0	0.352822	0.430514	0.617847	0	0.0797877	0.182469	2.24936	0.150196	0	0	0	0.637701	0.0847225	0.139855	0	0.242826	0.1266	0.196361	0.183545	0.575461	0.129076	0	0	0.126749	0.335267	0.149827
AC104964.3	0.049747	0.576086	0.382615	0.372832	0.203312	0.430851	2.58378	5.3832	0.489684	0.339212	0.425131	0.249082	0.454966	0.328496	0.788281	1.60347	0.803079	0.190991	0.372804	0.101304	1.44876	0.700199	0.397643	3.79271	4.47895	4.22613	0.22615	0.456185	3.04405	0.230984	0.470544	0.324613	0.375697	1.12157	2.99675	0.968799	0.427194	0.121691	1.14111	0.763497	0.576724	0.761905	2.76436	0.505472	0.24372	0.740308	0.476506	1.64554	0.398979
AC104958.2	8.10515	1.66485	2.04693	1.79577	2.0539	1.15293	1.99168	1.00697	1.39386	0.596674	1.41471	0.644483	1.14953	0.0574465	1.34008	1.16248	2.46031	1.66296	2.31584	1.74575	0.762467	0.872806	1.67449	1.22947	1.84531	0.97036	1.10607	2.06763	1.29856	3.77807	0.442294	1.62733	0.14772	1.76523	0.676041	1.56347	1.34536	0.897138	1.19178	1.21785	1.86964	1.53142	0.715502	1.5204	2.00501	1.30086	0.995332	0.987288	0.794173
AC104564.3	0.169984	0.708647	0.245866	2.02334	0.265253	0.393914	0.683511	1.20013	1.12305	0.0732049	0.090165	1.77909	0.268636	0.0939735	0.792057	0.576559	0.21343	0.463695	0.0996934	0.233654	1.49039	0.256068	0.195658	2.08203	1.62453	2.0338	0.101776	0.614966	1.29651	0.409347	1.22999	0.194785	0.407778	1.28339	1.96604	0	0.336856	0.528327	3.11931	1.09775	0.0945909	0.972592	2.86452	0.621785	0.845593	1.07965	0.244231	1.72272	0.360873
AC104211.1	0.0936337	2.79369	0.0644917	2.88954	0.852317	1.57806	0.266691	0	0.398354	0.655267	0.0827773	0.249534	1.07898	0.0215684	5.15623	0.905413	1.93143	0.269612	0.480506	0.947416	2.00874	1.18612	0.314346	0.916711	0.237994	2.11763	1.40156	4.5872	0.766624	0.939517	0.415151	0.983538	0.124789	0.12887	1.1281	0.824309	0.618511	0.14147	0.53695	0.0279945	0.369073	1.62346	0.636245	0.0285419	0.247008	0.107737	1.17715	1.40858	0.265044
AC104083.1	0.737528	49.1075	14.7024	21.1717	21.0501	20.447	27.7359	10.5825	11.038	10.1795	15.4399	17.18	23.9879	5.84864	34.9122	19.6738	27.6183	11.4117	22.1682	35.6554	23.2542	16.4585	18.3701	17.582	21.2169	19.9261	25.331	28.7941	16.8885	14.0699	14.4289	11.5946	8.08097	36.5926	17.9389	40.9385	11.962	13.6693	14.172	20.7022	40.8394	21.4375	30.6115	13.2458	20.9621	23.7558	22.6483	20.534	29.0564
AC104031.1	0.127488	1.77162	4.7417	0.899263	3.22092	1.43241	4.44282	3.26507	19.781	2.92819	15.328	0.0617738	0.671589	0.117467	2.25016	1.63105	12.6152	1.15924	15.3279	6.96094	1.46661	5.64513	30.3881	2.65565	11.1903	7.56475	7.4636	0.816751	2.22495	4.36436	3.93416	5.96528	0	4.4618	12.2877	1.6325	10.0215	11.8323	1.80335	8.2331	1.24151	8.67597	14.3226	7.30597	3.89165	0.528088	8.92969	4.64326	7.9392
AC103706.1	1.04769	0.599492	0.312699	0.246337	0.544959	0.171668	0.912775	1.01527	0.454468	0.275731	0.740973	0.879936	0.36794	2.09157	0.673922	0.498752	0.208804	0.232872	0.375502	0.213351	0.542906	0.749279	1.10544	0.960258	1.37291	1.12104	0.650529	0.315861	0.61701	0.709078	1.33783	0.433532	0.279259	1.1261	1.09395	0.167698	0.576723	0.512571	1.25502	1.7959	0.194336	0.696337	1.26562	0.127745	0.421155	0.578641	0.397235	1.25351	0.296564
AC103691.1	0.395212	1.30466	0.408313	0.763941	0.237197	0.992704	1.98646	10.9214	1.36946	1.11285	0.886911	1.94445	0.520481	0.378153	1.09462	3.03919	1.00881	0.442294	0.312021	1.28847	1.41782	0.562051	1.61841	2.46975	3.33814	2.61713	0.21236	0.481181	1.7096	0.45218	2.81444	0.304819	0.405164	1.3987	4.06559	0.766413	0.33135	0.551188	2.44071	2.39956	0.54981	1.54178	4.46204	1.00083	0.99675	2.30869	0.682496	2.21448	1.06492
AC103563.7	5.8207	0.486617	0.0683369	0.262442	0.0368626	0.243855	0	0.686762	0.595914	0	0.48242	0	0.108887	0.0457089	0.747167	0.0295199	0.177964	0.270651	0.290946	1.09861	0.030848	0.588791	0.761345	0.165339	0.470743	0.0482558	0.0660056	0.3739	0.384789	2.95147	0.668654	0.189487	0.220382	0.507199	0.298839	0.119108	0.0983084	0.12849	0.455172	1.36453	0.0460092	0.430064	1.34836	0.24195	0	0.91329	0.683067	0.366596	0.140423
AC100830.2	0.461081	2.18065	0.476365	1.39386	0.660763	0.346913	1.3243	0.41034	0.593431	0.0709172	0.174695	1.05324	1.12771	0.364147	2.32517	0.235175	1.18149	0.359364	0.386312	0.452704	1.47453	0.405926	0.189543	0.905577	1.54028	1.0572	0.197192	1.26596	1.49017	1.3996	1.19155	0.188698	0.351142	1.16558	0.9523	0.474446	0.195798	0.853028	1.51092	0.23632	0	1.11351	19.8726	0	0.893638	0.636639	1.59704	1.87749	1.11871
AC099850.3	0.492476	1.26808	1.72992	0.586202	5.4892	1.55624	2.52484	1.53398	1.77475	0.265111	1.50205	8.80536	1.00529	0.27226	2.71197	0.747286	1.01586	4.70196	1.73299	0.564117	1.74555	2.86635	0.283429	0.615515	1.40196	1.65272	2.6538	1.94871	1.87813	0.732503	3.82555	0.846495	0.787608	1.80103	0.801	4.96617	1.95188	3.12511	2.08987	2.12026	1.16471	1.15273	5.4881	2.61208	9.24261	1.15598	1.23827	1.09179	4.02525
AC098484.1	0.783892	3.52429	2.12593	2.1167	1.05576	2.44272	1.11635	1.01737	2.05984	0.843973	0.736317	1.42437	3.22612	1.94112	3.57423	1.34108	0.908084	1.54437	1.29303	1.6462	2.77237	3.08638	1.69179	1.14303	0.498115	1.62036	2.24896	1.58784	1.7312	1.82758	1.35549	1.96495	2.00238	2.08071	1.41664	2.90157	1.55343	1.48046	1.64827	0.527326	0.727021	1.95377	6.03679	1.61291	2.5849	2.16472	4.13559	1.29304	2.49629
AC097534.2	0.114049	5.81896	2.36969	3.31006	1.99862	4.51167	2.43311	4.01295	8.74329	2.38759	1.00826	9.65246	3.54637	0.210169	3.34153	2.86735	2.94921	7.81238	2.21103	4.34741	3.90648	3.47518	5.40597	6.74703	4.8443	7.0262	3.6356	2.80085	2.96515	1.59763	4.39595	2.74084	0.396882	2.22745	7.981	3.24791	2.98209	4.12736	4.98512	3.94404	3.16444	5.09189	4.68426	4.46152	7.19925	2.22213	3.64713	6.22068	6.22799
AC097376.2	1.02356	0.921171	0.462009	0.783322	0.451917	0.661551	0.379609	0.759393	0.904247	0.305994	0.387429	0.89273	0.60725	0.222499	0.593541	0.48608	0.491964	0.831317	0.410887	0.400684	0.871298	0.623298	0.443237	0.698015	0.618329	1.07298	0.444264	0.368504	0.856877	0.830542	0.706377	0.384323	0.463539	1.00116	0.980555	1.78231	0.315088	0.262536	0.873042	0.730888	0.403682	0.597018	5.34261	0.461648	0.62467	0.554335	0.72461	0.862347	0.597046
AC097359.2	5.59815	0.519276	0.546924	1.33026	0.523669	0.829454	0.4989	0.425971	0.695524	1.04016	0.666897	2.10657	0.662312	11.9533	0.616671	0.561113	0.830848	1.60051	1.14487	0.40931	0.611046	0.493885	0.59029	0.860124	0.901514	0.96552	0.647126	0.441387	0.432	2.79804	0.866094	1.06157	3.13955	0.749408	0.645762	0.714946	1.00317	0.351352	0.834831	0.451076	0.828512	0.662576	2.33814	0.931896	1.06234	1.42533	0.766544	0.408663	0.625145
AC096992.2	0.81671	1.22011	0.397645	1.53953	1.01495	1.3448	0.726637	2.26126	1.33909	0.545776	0.85895	1.59658	1.04467	0.765488	1.60387	0.728987	1.04397	0.648733	1.25253	0.451629	1.52357	1.69698	1.58028	1.83032	1.12622	3.13668	0.59017	1.27357	1.17717	1.12367	2.01783	0.322713	0.925814	1.60579	1.91704	2.41167	0.911551	0.607859	3.15462	1.38087	0.822756	1.47708	5.53682	0.686769	0.530664	1.89242	0.665961	1.87303	1.24559
AC096921.2	0.222771	1.214	1.51732	1.37494	1.34268	1.50353	0.763064	0.976593	0.768115	1.16369	0.579884	1.04345	1.1029	0.319294	2.9766	2.11363	1.33935	0.390124	1.07667	1.03961	1.23134	1.47455	0.819112	1.11371	0.570423	2.90134	0.732779	2.35066	0.906633	2.32001	1.02723	0.980913	0.241914	0.798144	2.19188	3.77378	0.670371	0.651792	0.955758	0.68084	0.780523	1.59864	3.52085	0.271625	1.26863	0.854422	1.48183	2.12965	1.7166
AC096586.2	0.394316	0.659306	0.407387	0.758562	0.279688	0.415351	0.864851	1.33989	0.968866	0.231566	0.380288	1.40693	0.30686	1.28814	1.03763	0.479949	0.45009	0.554121	0.525594	0.492739	0.802467	0.392733	0.464187	1.16487	0.510238	2.3014	0.393489	0.324217	0.486585	0.482403	0.724755	0.205385	0.573293	0.718908	1.48999	1.97955	0.319669	0.510656	0.822268	0.643049	0.448824	0.652605	6.91771	0.393374	0.972667	0.494957	0.675996	1.07853	0.722973
AC095057.3	0.0819801	0.854419	0.254093	0.704759	0.624403	0.417375	0.65929	1.02142	0.553937	0.220659	0.85158	0.575986	0.440857	0.226608	0.414792	0.536614	0.575936	0.236056	0.420702	0.313019	0.586245	0.374233	0.511128	2.28831	1.75033	1.35567	0.177251	0.27805	0.706537	0.348389	0.726963	0.450135	0.400612	0.660866	1.48154	0.86934	0.203074	0.637006	1.04994	2.74516	0.494211	0.533027	2.26537	0.524782	0.911403	0.981017	0.404897	1.31982	0.870212
AC093752.3	0.596547	0.580862	0.398796	1.32269	0.430241	0.813185	0.740787	2.44109	0.816708	0.245573	0	3.34113	1.24777	0.775985	1.46168	0.736065	0.582219	1.02106	0.540236	0.140685	1.9475	0.624732	0.0504888	1.44731	2.06927	1.89446	0.315157	0.614923	0.74851	0.90718	1.71767	0.27645	0.491053	0.80724	1.74395	0.27382	0.504162	0.52261	2.45503	2.95859	0.390542	1.36895	2.00294	0.770157	1.56709	1.42933	0.992612	1.66703	1.17334
AC093726.2	0.512205	0.913512	0.793775	1.44723	0.363306	1.17715	0.725539	3.62598	1.11869	1.02773	1.35845	2.19984	0.858526	1.48019	1.89027	2.4522	1.1693	1.4184	1.16064	0.346695	1.08581	0.717395	2.24437	3.69554	3.62164	3.39709	0.534363	1.18448	1.33936	0.841	1.759	0.967111	0.651604	1.37329	2.48243	1.78878	0.85355	0.844234	2.00269	3.4665	1.32797	1.05964	2.46796	1.8736	1.26347	2.08954	0.669027	2.83882	0.889692
AC093535.1	0.159114	0.791869	0.145049	0.235198	0.323405	0.335205	0.818575	0.680256	0.477836	0.393005	0.285469	0.625857	0.191059	0.194039	0.4163	0.375946	0.411316	0.12766	0.16468	0.300195	0.724608	0.230722	0.6464	0.795469	0.980147	0.5053	0.308222	0.222215	0.689689	0.424273	0.717098	0.0536264	0.12474	0.430624	1.37009	0.539335	0.213302	1.04242	0.719229	0.990615	0.195314	0.438161	9.64167	0.32525	1.59786	0.478166	0.378222	1.27463	0.218575
AC093484.4	0.260008	0.828903	0.322352	0.137552	1.33312	0.273879	0.627301	0.971858	0.936996	0	0.137917	1.20947	0.239695	0.574969	0.403845	0.510578	0.0932751	0.236424	0.0762457	0.0595663	0.727566	0.28486	0.374099	0.519948	0.898792	1.36577	0.103785	0.293955	1.10922	0.294654	0.553353	0	0	0.368079	1.40965	0	0.206103	0.336722	1.13319	0.0932844	0.21703	0.33811	6.07768	0.66576	0.235168	0.718014	0.0466971	3.95262	0.496794
AC093278.2	0.706134	7.42582	5.17251	7.00855	5.62291	11.3916	7.46939	2.89302	4.19342	7.74639	3.49249	3.56951	4.36073	0.694591	14.0352	8.7559	10.863	2.09978	3.9082	9.76456	6.37877	8.23286	5.61078	5.5895	3.1951	5.62501	4.08826	15.6429	7.22887	5.94311	3.01915	1.45795	0.966524	3.58727	7.57625	10.6077	3.12646	2.85052	4.0056	1.76884	6.69064	10.9196	9.02582	1.21004	5.70346	4.39188	9.66008	6.67889	7.52932
AC093227.1	1.54598	4.26154	1.18891	2.24452	1.10127	1.61621	1.43726	3.1379	2.84498	0.951125	2.62042	4.13975	1.76811	1.73505	2.56863	1.46293	1.33438	0.951257	1.53388	1.09182	2.46117	1.55207	0.802771	4.98309	3.50995	4.37581	1.11355	1.59012	3.17819	1.77832	1.29875	1.06559	0.99146	1.5084	3.99126	6.15385	0.748637	2.03221	2.27971	2.96096	2.86225	2.07082	6.19241	1.65824	2.66777	3.0976	1.5031	3.2396	1.98653
AC093110.1	1.30459	1.06641	0.607845	1.79307	1.58241	0.714034	1.80002	1.32796	0.384098	0.316718	0.0339213	1.48737	1.16224	0.406572	3.32296	0.662144	0.860305	0.453566	0.525084	0.615326	2.17124	0.341556	0.128816	0.959128	1.37839	2.07149	0.344607	0.954354	1.67825	0.978364	1.32017	0.0549605	1.3807	1.35796	4.4379	0.491336	0.418208	0.927565	2.11235	0.504762	0.409243	2.06236	4.41497	0.280709	1.18573	1.00661	0.792491	2.81523	1.03182
AC092894.1	3.19609	0.446455	1.02405	0.133767	0.0225468	0.202421	0.050837	0.588076	0.015187	0.91471	0.630376	1.92601	1.96471	0.293554	0.79261	0.325002	0.616821	1.51747	0.845289	0.0810986	0.216982	0.851847	0.873136	1.58014	0.647836	0.295154	0.464277	0.160086	0.621073	2.84398	0.107626	0.115899	1.32099	1.59885	0.310731	0.631381	0.731579	0.0261966	0.730808	0.90718	1.49149	0.710225	5.63557	0.443961	0.0114349	1.22894	1.58943	0.128129	0.762266
AC092611.2	5.82418	2.42295	1.12823	1.65062	0.869425	2.46491	0.156825	0.647906	2.03016	0.335924	0.137917	2.11657	2.8421	1.72491	1.83566	0.464162	0.513013	1.08755	1.37242	2.08482	2.47372	1.78038	0	0.90991	0.528701	1.28989	1.29731	0.823073	1.00838	4.60396	0.719359	0.521402	2.07913	0.797504	1.2217	3.18378	0.618308	1.01016	2.38566	0.186569	0.940464	1.48768	6.36036	1.42663	2.05772	0.50261	2.33486	1.89396	2.20797
AC092279.1	0.873039	0.796222	0.298175	0.65844	0.329728	0.456006	0.427936	0.644258	0.368355	0.100987	0.354014	1.54178	0.627143	0.438772	1.38555	0.30913	0.472378	0.433008	0.158686	0.785156	0.760485	0.825068	0.570966	0.342677	0.447477	0.65272	0.266402	0.416018	0.587633	0.940309	0.944362	0.651098	0.942362	0.578801	1.23873	0.467733	0.478993	0.308352	1.57229	0.504783	0.21079	0.722453	14.2768	0.0263925	1.44385	0.796992	0.602565	0.925464	0.850135
AC092171.4	0.400215	0.552064	0.0516852	0.893215	0.306683	0.131739	0.578335	1.2466	0.638501	0.215445	0.431208	2.65432	0.197651	0.276567	0.618083	0.647476	0.358932	0.272935	0.0366752	0.143261	0.209981	0.205532	1.54754	4.15794	2.84829	1.2774	0.199688	0.169675	0.420373	0.230315	1.43732	0.0358287	0.100009	0.737711	0.949286	0.120113	0.198276	0.259148	1.89343	2.51277	0.243587	0.683067	2.65149	0.320239	1.10291	1.89956	0.247081	1.14868	0.159309
AC092119.2	0.805799	1.24804	0.0985867	0.616999	0.271809	0.145187	0.415677	1.62925	0.589053	0.194059	0.323379	1.35629	0.251339	0.395653	0.613807	0.520509	0.389866	0.22174	0.10882	0.0607249	0.395583	0.232321	0.57969	2.21301	2.7057	1.6708	0.126964	0.131856	0.657918	0.330423	1.76004	0.0151869	0.197826	1.52597	0.689795	0.140011	0.294156	0.411925	2.2375	1.65472	0.118001	0.827246	3.40053	0.368442	1.53435	1.66891	0.371322	1.64538	0.101291
AC092118.2	0.0237009	0.726521	0.195892	0.626922	0.105669	0.249652	0.810068	2.21473	0.213528	0.280692	0.377152	0.482336	0.18728	0.425839	0.518718	0.486569	0.467634	0.215511	0.0695014	0.162892	0.906385	0.178518	0.647914	1.62922	1.87954	1.65994	0.189209	0.428724	0.765989	0.235016	0.378304	0.169743	0.284283	0.78288	1.92744	0.0284526	0.11742	0.122775	1.08732	0.637746	0.0989163	0.986246	1.09513	0.173391	0.428732	0.752677	0.276682	1.35112	0.628958
AC091185.1	0.239523	1.06463	0.556791	0.871161	0.700809	0.409988	0.632054	1.86518	0.809224	0.12894	0.11911	1.61033	0.552026	0.124141	0.972343	0.347418	0.886114	0.517266	0.0877981	0.171479	0.921584	0.615039	0.129234	1.16004	1.09585	1.39796	0.209143	0.406192	2.16752	0.466535	1.46555	0.214429	0.438928	1.41283	1.40681	2.04874	0.355996	1.08567	2.30071	0.859347	0.249914	0.895478	5.61511	0.492835	0.812398	1.44691	0.457066	2.13351	0.603847
AC090948.3	0.659883	0.738757	0.0889248	0.189726	0.255831	0.211548	0.461463	1.01282	0.301562	0.308895	0.456552	1.00094	0.132246	1.22924	0.283578	0.409743	0.257311	0.208705	0.168266	0.197185	0.561982	0.255392	0.784317	0.896463	1.16679	0.544213	0.143152	0.129746	0.760345	0.8738	1.52649	0.0410957	0.229421	1.28616	1.29623	0.344426	0.198996	0.3344	1.57947	1.38962	0.359222	0.447704	7.72016	0.314842	0.551428	0.277302	0.180347	0.636053	0.548186
AC090948.2	0.672702	0.481153	0.376459	0.333636	0.624835	0.26572	0.394473	0.116409	0.0420873	0.0603551	0.0371691	1.1001	0.258395	0.81352	0.375985	0.325242	0.326794	0.254868	0.164388	0.19264	0.470596	0.71013	0.161313	0.455416	0.284974	0.408976	0.167823	0.443642	0.326116	1.31027	1.87905	0.0802969	0.522977	1.02505	0.506543	0.471081	0.610999	0.544486	1.02871	0.703933	0.155974	0.364487	11.7323	0.102528	0.792232	0.657925	0.427891	0.221926	0.327281
AC090948.1	0.691082	0.458992	0.237997	0.380835	0.545621	0.303312	0.926288	2.03302	0.259423	0.372025	0.420031	0.795296	0.132727	1.03474	0.853832	0.616853	0.464847	0.340381	0.633298	0.296855	0.510312	0.492928	0.580023	1.11566	0.585519	0.546196	0.229877	0.390654	0.632827	0.611849	1.80782	0.206227	0.383762	1.5626	0.832612	0.276544	0.285315	0.522072	1.4201	2.11784	0.280413	0.337001	16.8271	0.526648	0.748768	0.35783	0.181004	0.86636	0.489052
AC090589.3	1.10164	1.04685	0.398354	1.63912	0.920924	0.667233	1.41197	2.97389	1.15791	0.148259	0.146086	3.52304	0.870491	0.609027	1.7694	1.08164	1.1609	0.876497	0.565334	0.252379	2.26061	0.735476	0.911393	2.58163	4.14413	3.49611	0.219865	0.9341	2.36765	0.760761	2.75481	0.157796	0.69739	1.39707	3.33471	0.562062	0.654932	0.998667	3.34823	3.06311	0.613028	1.18185	4.94055	0.95705	1.74368	2.28163	0.79141	3.57618	1.40325
AC090559.1	1.91747	1.6719	2.81747	2.74263	2.27972	2.21426	2.25596	1.5927	2.49529	1.57509	1.01709	3.90224	2.81518	2.27715	8.37311	1.57206	1.23562	3.52583	1.70769	0.585709	6.66389	5.50474	0.776565	1.24264	0.620951	5.40907	2.23945	3.3561	1.83617	3.2997	10.6101	1.28172	2.25261	5.04353	3.05455	0.78435	3.7154	1.72905	8.95962	3.33779	1.16581	3.82328	3.78333	2.38993	3.25981	3.88308	1.68361	2.92392	2.6083
AC090198.1	0.597434	1.87663	1.60204	1.93542	1.32433	2.00105	1.38335	1.74242	1.82439	0.766087	0.676525	1.88327	1.69295	0.556658	2.26534	0.952684	1.14988	1.55038	1.37793	1.36868	1.99109	1.72827	0.647103	1.45144	1.21482	2.1744	1.80864	1.3281	1.5924	1.36929	1.47862	0.55768	1.69085	2.23317	2.03804	2.80437	0.77155	1.14751	2.51755	1.52931	1.3074	1.56251	7.11568	2.06258	1.97321	1.7425	2.39914	2.4236	1.92389
AC087741.1	0.225307	0.745522	0.232775	1.27766	0.619223	0.611195	0.716706	5.76816	1.31153	0.196054	0.331518	1.80806	0.375982	0.806214	0.902104	1.88985	1.20686	0.477094	0.334874	0.134344	2.26564	0.490302	1.33221	1.85545	4.23935	3.30548	0.104717	0.369871	1.19699	0.2973	1.34654	0.287357	0.460694	1.91154	2.99523	0.0703981	0.357803	0.38771	4.16638	1.88798	0.313441	2.32381	2.8606	0.81286	0.910736	2.25862	0.670717	5.29794	0.815769
AC087623.1	0.444059	1.19786	0.397608	0.822219	0.758929	0.280649	1.42846	5.22531	1.55581	0.127492	0	0.602468	0.487342	0.286408	0.752414	0.184969	0.743406	0.215349	0.0434058	0.135642	0.524647	0.20271	0.085188	1.517	1.44472	1.46864	0.265876	0.33469	1.95181	0.503229	0.53553	0.127212	1.02581	0.279391	1.6585	0.106617	0.0586659	0.23003	1.42603	0.531057	0.164737	1.11639	2.65531	0.324865	0.702861	0.245254	0.106336	2.62521	0.534214
AC087500.2	0.126976	0.973071	0.131185	0.503804	0.424587	0.568435	0.382931	0.791017	0.524316	0.205062	0.378856	0.738309	0.836114	0.307112	1.3895	1.24671	0.740208	0.952531	0.325805	0.181809	0.917882	0.195627	0.456731	1.22992	0.968223	0.833721	0.12671	0.322996	1.23112	0.269803	0.844475	0.409224	0.0846125	0.861314	3.04047	0.342973	0.377441	0.493318	1.71116	1.87917	0.441614	0.577909	0.0862807	0.406407	0.78956	0.920442	0.370576	1.75936	0.505439
AC087500.1	0.252647	1.30109	0.357973	1.06926	0.555161	0.631096	0.645825	1.18418	1.50661	0.365272	0.593483	1.60544	0.77478	0.379112	1.19252	0.451021	0.530859	0.840157	0.423355	0.330743	1.18501	0.756246	0.591998	1.49764	1.18159	1.89586	0.367371	0.448851	1.00317	0.593074	0.906387	0.506641	0.548359	1.31141	1.81328	0.294633	0.400535	0.74786	2.19393	1.3467	0.351477	1.25783	2.86452	0.567698	1.17519	1.24587	0.913984	1.72604	0.628314
AC087481.3	4.44875	2.29246	1.45734	3.62079	1.90716	1.75838	2.23188	5.96228	2.89509	1.12329	0.774781	4.12521	1.87967	3.0916	3.21742	1.77313	2.39541	2.5349	2.1906	1.33851	3.48002	1.65171	1.93346	5.33071	3.64899	4.3234	1.21605	2.03825	3.8359	3.25146	3.06419	1.21946	1.94667	2.80626	5.79224	0.921839	1.3894	2.32398	5.37995	4.35708	1.17277	3.74456	12.8858	1.9082	2.68941	2.48932	1.70141	6.80682	3.66798
AC087286.2	0.167666	0.264322	1.03934	0.411821	1.97561	0.731671	0.81866	0	0.0359655	0.180517	0	0.591905	0.441621	0.0331043	1.11608	0.256555	0.665928	0.0435593	0.175596	0.438986	0.424487	0.606839	0	0.0299364	0.121761	0.244642	0.382432	0.812384	0.557361	0.288403	0.382317	0.0343087	0.063844	0.310822	0.432864	0.833875	0.379729	0.744461	0.549424	1.03122	0.633114	0.840971	18.359	0.0876151	0.487439	0.562227	1.01092	0.568937	0.661053
AC087276.1	0.345541	1.05921	0.178498	1.48526	0.770288	0.363974	1.30259	1.25569	0.648558	1.02307	0.114554	1.3813	0.625715	0.716355	0.426916	0.69396	0.464847	0.314198	0.12666	0.197904	1.20863	0.354908	0.497163	0.863739	1.5809	1.26045	0.258612	0.390654	1.39594	0.856589	1.83846	0	0.575643	0.509544	2.02949	0.207408	0.599162	0.111873	1.58522	1.85957	0.240354	0.786336	18.3141	0.157994	0.390661	0.596383	0.155147	1.09435	0.733578
AC087222.1	0.15683	0.653811	0.0972174	0.705225	0.524415	0.132157	0.662152	0.3908	0.61227	0.0675402	0.0831879	1.45904	0.289156	0.433509	1.57226	0.335965	0.562612	0.171126	0.643853	0.143716	1.72614	0.300686	0.135388	0.15681	0.765358	1.46453	0.0313003	0.567379	0.628506	0.466535	0.700914	0.134784	0.334421	0.666047	2.32407	0.0376545	0.279711	0.284343	0.827407	0.450134	0.0436357	0.856544	8.86637	0.286835	0.638313	0.476397	0.309832	1.14239	0.566012
AC084876.1	0.0246622	0.483834	0.382196	0.293558	0.137444	0.0779336	1.06605	2.40699	0.296252	0.132762	0.261633	0.3585	0.162397	0.272684	0.55717	0.330199	0.508721	0.201827	0.0723204	0.0564997	0.391062	0.320857	0.81613	1.26377	3.28471	1.58333	0.0738315	0.195175	2.58247	0.15721	0.761055	0.0706513	0.295814	0.814635	2.67416	1.42112	0.244365	0.351325	1.13142	1.15026	0.137238	0.224492	3.28459	0.721697	0.669183	0.646997	0.110733	1.6793	0.104715
AC084824.5	0.535881	0.985606	0.514099	1.72123	0.810621	0.887022	0.654135	3.6563	1.26445	0.370899	1.7258	1.27975	0.756147	0.687736	1.29714	1.63996	0.961208	0.487273	0.448982	0.613836	0.856872	1.17945	3.6899	2.20065	6.42122	2.90423	0.420166	1.60116	2.00407	0.623553	2.24021	0.493447	0.45912	1.89654	4.01211	2.02185	0.417196	1.33841	1.84383	3.50189	1.54426	1.69235	4.99383	1.40014	1.21171	2.11406	0.756199	2.48514	1.13767
AC084125.2	0.290716	0.170309	0.156851	0.756169	0.169219	0.588632	0.295492	0.905532	0.324968	0.0869439	0.235592	1.09406	0.104224	0.321438	0.335235	0.256607	0.156437	0.237911	0.0710422	0.0296006	0.436877	0.0840495	0.329977	1.47358	1.3038	1.24899	0.164394	0.843591	0.553299	0.205908	0.629018	0.416415	0.103319	0.731645	1.0566	0.0542889	1.5555	0.230077	1.10031	0.822824	0.1438	0.394844	0.623358	0.189051	0.33233	0.423708	0.252359	1.04348	0.147439
AC084036.1	3.23638	2.21309	1.51108	2.14017	4.50914	2.68789	3.87906	6.65591	3.17742	3.45093	5.94237	0.995191	1.57784	4.21493	1.64776	5.83309	4.10264	3.70682	6.20532	1.39019	1.04495	1.83253	6.04449	6.61194	6.64415	3.45086	2.08061	3.06083	3.05744	2.33635	7.45066	1.96127	1.70041	3.89139	5.51134	2.80185	1.85006	10.9618	3.60479	14.9049	6.14748	1.25447	8.79655	7.51282	1.6184	8.37871	0.754508	3.44946	2.18016
AC084033.3	3.22918	3.6492	2.73869	4.81263	1.35644	4.60717	1.97434	6.85568	11.8324	6.05823	8.75604	4.48387	3.34822	6.42809	3.13047	7.36715	3.99832	6.61755	4.27534	2.67758	3.94483	3.68799	6.1197	6.17439	6.54171	4.43041	3.2224	3.26935	4.68858	3.3454	4.17984	3.72793	6.13428	2.51595	6.07527	3.4137	5.07402	4.75927	3.21991	8.79717	7.79456	3.71343	3.50423	8.9692	5.47626	7.10396	3.2893	3.79696	4.19515
AC084018.1	1.96224	3.79539	0.485407	3.76488	1.54024	1.39735	4.83417	3.84515	0.995968	0.416577	0.0366492	4.98165	1.54689	0.42017	6.10723	1.9735	1.16496	0.70365	0.567311	0.66481	4.9237	1.11653	0.994108	3.62691	5.25447	5.60527	0.854957	1.31231	3.69788	2.60346	8.02865	0.356282	1.62066	3.06475	4.49512	0.199068	1.12275	2.61277	9.0655	3.22255	0.845861	4.67206	8.18791	1.26368	4.37445	4.15946	1.38981	7.04607	1.23214
AC083843.2	1.83543	2.05832	0.914183	2.12322	1.02572	1.10781	0.950499	1.62745	1.02116	0.168759	0.352015	2.38508	0.782428	0.489179	0.954907	0.823659	0.888806	0.774704	0.366975	0.715291	3.02075	0.598967	0.600185	1.07748	1.78898	1.93295	0.486909	0.783152	2.89897	2.36006	0.879701	0.231761	0.333565	0.700878	2.84182	2.08808	0.418336	1.00513	1.3773	1.36962	0.235645	1.47282	10.7402	0.915524	3.89868	1.02977	0.799131	3.95936	0.746043
AC080162.1	0.0965896	0.750078	0.299374	1.10714	0.394753	0.712196	0.38839	0.869152	0.676825	0.138657	0.128086	0.795637	0.614825	0.222493	0.659192	0.68972	0.433131	0.556245	0.188829	0.442562	1.08112	0.661386	0.231621	0.885289	0.720153	0.892585	0.128516	0.364001	0.894881	0.478887	0.58243	0.0922352	0.214547	0.227894	1.28008	0.54112	0.0957055	0.416959	1.07087	1.09737	0.179164	0.75362	13.4766	0.176658	1.01922	0.844653	0.664982	1.2746	0.820232
AC079921.2	0.277952	1.32064	0.502539	1.14878	0.503438	0.658753	1.15258	1.08222	0.834716	0.261848	0.184293	1.0101	0.503323	0.288116	0.98117	0.58923	0.560881	0.252739	0.509422	0.238789	0.810183	0.856459	0.399915	0.0868485	0.494539	0.304171	0.173355	1.02128	0.830938	0.615211	0.961253	0.248832	0.0926089	0.983701	0.941835	0.583934	0.378685	0.359959	1.75333	0.373958	0.386679	1.12951	5.76051	0.12709	0.746335	0.527701	0.873595	0.935308	0.995771
AC079015.1	0.106097	0.748024	0.164421	1.22781	0.0295643	0.223514	0.34663	1.48714	0.119483	0.371244	0.422081	1.38804	0.174658	0.953137	0.898857	0.615559	0.333036	0.699433	0.816699	0.0303828	1.63287	0.599354	0.801424	1.79016	0.835986	1.85769	0.423499	0.179924	0.600067	0.263013	2.8507	0.341936	0.282799	2.25294	1.62977	0	0.709602	0.274801	5.14117	0.856463	0.3321	1.2417	2.52327	0.242559	0.479806	0.805718	0.262005	1.05005	0.78835
AC078864.1	1.48205	32.8234	7.62397	19.1928	5.29987	10.1147	10.8634	42.5087	8.66965	1.46267	7.36993	9.2458	5.67243	0.469408	8.4142	6.94502	13.5409	1.37569	6.20211	3.18308	10.5406	4.24954	20.6128	14.8957	11.7719	30.0943	4.28276	5.3757	21.5143	5.44534	1.28136	3.0516	0.329196	7.57629	1.78556	19.645	3.30408	2.15923	25.5321	11.7976	1.50339	10.1581	8.2243	5.02589	1.8152	5.49954	12.5323	16.917	2.75306
AC078778.1	0.279606	1.08126	0.177769	0.398245	0.239733	0.226555	0.475668	1.9205	0.452138	0.0694699	0.199651	0.781628	0.184116	0.23781	0.227772	0.460752	0.308633	0.0977861	0.094607	0	0.722221	0.191457	0.959321	1.66666	2.77715	1.25531	0.0858522	0.121581	0.931463	0.274208	0.801045	0.0616156	0.171988	0.761197	2.52651	1.05863	0.0852452	0.222832	1.33207	2.58506	0.149608	0.391563	4.6183	0.196687	0.632234	1.42548	0.154513	0.987706	0.114154
AC074117.1	0.352124	1.32935	0.64143	1.36649	0.919233	0.693012	0.82439	1.69331	1.08529	0.279346	0.251904	1.09107	0.607127	1.10781	1.26917	0.769213	0.652379	0.467636	0.672536	0.573178	1.3008	0.869275	0.626626	1.40136	2.07737	1.54812	0.582559	0.686193	1.70405	0.662884	1.50372	0.650377	0.543385	1.54682	1.9593	0.617392	0.541714	0.744025	1.63668	1.42956	0.580104	1.01219	2.05268	0.618596	1.96433	1.27946	0.478467	1.84154	0.683617
AC073957.3	0.428079	0.501942	0.217509	2.21206	0.563183	0.197121	0.251614	0.918074	0.71303	0.110815	0.0341221	4.14848	0.459022	1.33848	0.690325	0.181654	0.373432	0.493474	0.222938	0.101822	1.16514	0.205025	0.12453	1.69572	1.18677	1.20144	0.144728	0.354381	0.934434	0.65279	1.06786	0.117273	1.01633	0.963098	1.49228	0.115136	0.417207	0.493792	1.85656	1.3512	0.120408	1.04945	6.25633	0.56474	2.21624	2.31583	0.348701	1.37057	0.513996
AC073896.4	3.17739	6.63755	4.70117	5.6031	3.19177	6.7351	8.5176	22.5636	5.12441	11.1497	14.201	5.24602	4.15868	3.57822	5.28961	20.343	12.2077	9.52359	5.29142	5.25721	6.36647	5.58694	16.0853	14.0709	30.6295	12.4203	4.1102	5.63226	8.97587	4.55653	10.3937	5.1131	3.81638	5.96963	12.973	2.49585	4.23661	4.52126	8.77307	26.3881	10.8052	4.99899	3.83831	11.9096	5.10017	9.58682	2.8885	12.3613	7.1203
AC073896.2	2.22307	1.51434	0.708877	1.12525	0.856545	1.30092	1.51743	2.27967	1.44237	1.2706	2.00171	1.51603	0.831324	0.986232	1.10446	1.05339	1.05841	1.2977	1.32795	1.10032	1.17758	1.08999	1.93492	1.81801	2.70666	2.08237	0.876408	0.620571	1.01119	1.67175	1.13898	1.49386	2.01175	1.52173	1.43837	0.296529	1.27812	1.03074	1.88865	2.5109	1.03089	0.927923	2.3125	2.40942	1.11705	2.69056	1.10906	2.0861	1.39838
AC073611.1	0.635272	1.58784	1.86802	1.00177	1.6068	0.205896	2.60358	2.58762	1.87109	1.60468	1.06923	1.59829	0.820542	0.742928	1.51801	1.98463	0.766961	0.555431	1.1464	0.979576	1.27626	0.685954	2.07414	1.95443	4.99316	1.63995	0.487646	0.580095	2.19527	0.536479	1.404	0.699961	0.879212	1.47004	2.69352	0.615973	1.91258	1.13913	2.12976	2.32303	0.50987	0.889641	1.8595	0.938443	1.43645	2.56399	0.460764	1.54765	1.40054
AC073487.1	0.149419	0.842765	0.246995	0.790467	0.666176	0.15739	0.871186	1.48933	0.269231	0.225219	0.118885	0.608162	0.393559	0.165209	0.71733	0.666849	0.348415	0.380423	0.0876322	0.0684619	0.808346	0.102313	0.12899	0.896395	1.91412	1.52612	0.149105	0.101356	1.00444	0.571483	0.858587	0.0428048	0.238962	0.528809	1.29614	0.322875	0.148051	0.774014	1.19959	0.589684	0	0.427463	9.25959	0.546559	0.371645	1.1966	0.214683	1.84555	0.729591
AC073335.2	0.909643	2.14622	0.536349	2.0598	1.35699	0.808153	1.50557	9.93116	2.89731	2.33464	0.493471	10.7653	1.58822	2.54617	2.5137	1.87812	1.57394	1.80465	1.34047	0.505197	3.30817	0.981489	1.88386	10.5767	10.0844	3.7874	0.595988	1.00244	2.51523	0.569441	4.18471	1.01341	1.20007	2.98628	6.99903	0.303337	1.76167	2.60594	6.11744	10.0627	1.3166	3.19617	6.31842	1.89896	4.15525	9.47703	1.17577	5.01247	2.73581
AC073257.2	0.239523	2.64322	1.60851	0.277188	1.73534	0.725363	1.29421	0.310864	0.269741	0.547997	0.436737	1.13158	0.512595	1.24141	1.12031	0.881907	2.90001	1.03453	0.965779	0.514437	0.614389	0.553535	1.50773	0.636149	0.517486	0.611606	0.687183	2.3356	1.18052	0.530153	0.637194	0.857717	0.119707	0.105962	0.973943	0.287543	1.18665	1.70606	0.137356	1.28902	0.416523	2.2971	0.48827	3.12129	6.80384	0.909484	0.430179	1.42234	0.826317
AC073218.1	0	15.4162	6.3993	31.3007	11.3347	9.44577	17.9362	42.4258	6.24664	1.99066	3.92297	20.6953	7.5485	0.383313	17.1002	15.3483	16.4993	17.4008	9.08171	2.96508	23.1959	8.92562	7.98077	23.2244	22.3699	18.48	6.18098	4.91231	35.0171	7.3336	31.7748	1.98629	8.25492	13.6325	47.1138	19.4218	6.41208	11.9723	36.4741	14.9255	6.04469	15.1473	480.938	12.343	42.1212	19.53	25.0712	70.4151	9.22442
AC073046.1	0.121604	0.149104	0.795687	1.66191	1.67167	0.768545	0.325982	1.01007	0.973835	0.130924	0.268761	1.41414	1.12104	0.336136	2.00322	0.108542	0.545301	0.51601	0.534893	0.185725	1.70138	1.11022	0	0.658601	0.906654	1.24203	0.404496	1.23732	0.812223	0.890005	1.0352	0.116122	0.59424	0.812919	0.586031	0.389289	0.642617	1.10238	0.929795	1.16342	0.394735	1.05421	9.14442	0.741359	2.33721	0.0559683	0.982795	1.15538	0.946597
AC069544.1	0.332311	0.640299	0.670304	1.04644	0.194018	0.516723	0.413596	0.657202	0.522742	0.374818	0.608546	0.460057	0.500162	0.94044	0.659147	0.593235	0.808945	0.287779	0.301625	0.3444	0.369002	0.433421	0.865182	1.38445	0.788341	1.33918	0.505316	0.679833	0.634168	0.336241	0.875616	0.407995	0.54833	0.858728	0.972318	0.322946	0.376308	0.409863	1.08895	1.70321	0.770504	1.1935	2.45161	0.434129	0.53672	0.458839	0.397884	1.25292	0.235163
AC069281.2	0.642972	0.581375	0.311732	1.28744	0.332308	0.298908	0.8269	2.08107	0.258893	0.386733	0.623995	1.06519	0.215241	0.873755	1.34914	0.74384	0.418795	0.307023	0.242268	0.205728	0.998435	0.263177	1.17318	1.33336	1.33664	1.61427	0.254499	0.471076	0.501511	0.465581	1.62448	0.257257	0.526593	1.59754	1.46058	0.0301852	0.462689	0.409361	2.58308	2.84164	0.459736	1.12104	0.751765	0.321912	0.588855	1.48295	0.167732	1.42771	0.396542
AC069224.1	3.71477	0.9494	0.238084	0.987485	0.14384	0.446638	0.361384	0.669943	1.24568	0.426744	0.550059	1.27294	0.770859	0.331236	0.728869	0.460752	0.504284	0.360412	0.310851	0.358996	0.60185	0.624866	0.649863	1.20968	1.31204	1.04908	0.450724	0.656539	0.732857	3.56471	0.647375	0.171643	0.171988	0.467592	1.18274	0.719277	0.301403	0.238748	0.613177	1.57088	0.500119	0.683238	2.15465	0.202307	1.05256	0.445462	0.877416	1.64942	0.352246
AC068790.5	0.133593	0.436813	0.368057	0.530058	0.148904	0.515972	0.716243	0.92471	0.468058	0.287664	0.472414	0.97098	0.234583	0.184638	1.00604	0.476975	0.439313	0.364425	0.130584	0.0510089	1.45377	0.457381	0.576639	0.556564	0.950768	1.55941	0.311063	0.251725	1.20892	0.630808	0.521243	0.191355	0	0.788	1.28762	0.534587	0.39711	0.461356	0.868245	3.59473	0.309752	0.521165	13.435	0.895895	1.25865	0.737835	0.399885	2.82065	0.330885
AC068152.1	0.467456	1.41266	1.32202	1.93591	1.61573	1.95465	1.31481	1.06875	1.60942	1.19466	0.839036	2.28563	2.98173	1.64454	3.13356	1.10423	1.07138	1.66158	0.948471	1.25481	2.52362	2.36346	0.842414	0.784892	0.729696	1.01277	1.02248	1.46802	1.08348	2.34772	1.62793	0.798076	2.42275	1.45385	1.76636	0.736894	1.01057	1.19852	2.07954	1.49924	1.44514	2.4499	6.33993	1.10539	2.73857	1.23872	3.5829	1.12156	1.90461
AC067852.3	0.0364251	0.647608	0.282244	1.36094	0.710498	0.575523	0.814721	0.491652	0.259797	0.088238	0.0966054	1.57523	0.779523	0.226543	0.790772	0.284486	0.392014	0.488536	0.267036	0.114741	1.8007	0.286829	0.0393062	0.682881	0.574018	0.876944	0.281702	0.391217	1.35969	0.328939	0.465123	0.221742	0.667493	0.601591	0.954494	0.174911	0.52333	0.365584	1.82772	0.179691	0.0126684	0.757864	6.18775	0.682853	1.05013	0.628676	0.335272	1.44201	1.17928
AC067838.1	0.109591	0.940625	0.622731	1.23201	0.580219	1.38525	1.21184	2.78775	0.781642	1.85835	2.14357	1.03549	0.829883	1.32532	1.10254	2.76341	1.69544	1.34528	1.32565	2.4479	0.868876	0.61909	2.75938	3.73245	2.70196	2.39857	1.20297	1.36289	1.00943	0.620968	0.670545	1.13807	0.766792	1.45445	1.63393	2.56546	0.89585	1.20636	1.94822	2.654	1.71518	1.4251	3.49997	2.05448	0.154877	1.6645	1.15634	2.08249	2.03577
AC066613.1	0.212783	0.199514	0.232768	0.794598	0.599901	0.263687	0.641705	1.29957	0.545035	0.0673798	0.0165981	1.32821	0.296711	1.38393	0.830654	0.323994	0.505148	0.364201	0.201873	0.157712	1.05074	0.454243	0.0180089	1.07942	1.19621	1.24189	0.199846	0.311317	1.26212	0.65603	0.932332	0.0717141	0.383671	0.959783	1.2441	1.0969	0.620103	0.615963	1.43555	1.54927	0.104477	0.927754	7.58655	0.457846	0.834911	1.20976	0.303476	1.8433	0.637742
AC063965.1	0.0316804	0.388449	0.130922	0.377096	0.52967	0.133481	0.350317	2.10515	0.665974	0.136434	0.126032	0.598674	0.521524	0.481638	0.626258	0.0282776	0.369362	0.115227	0.0464503	0.508045	0.531896	0.216928	0	0.356357	1.15954	1.20185	0.0948417	0.214899	0.614326	0.31414	0.26969	0	0.253329	0.784841	3.3779	0.912762	0.0941711	0.287192	0.799363	0.340983	0	0.617948	30.9988	0.0579419	0.393989	0.787369	0.0853462	1.75584	0.538055
AC063948.1	1.45989	0.971736	0.215469	0.937819	0.232458	0.439362	0.419304	1.73231	0.563681	0.314356	1.71468	1.27329	0.302126	0.691784	0.618409	0.670156	0.523719	0.720624	0.366945	0.238894	0.505777	0.514101	1.3203	2.81513	2.88372	1.0955	0.249741	0.330098	1.05149	0.531776	0.621391	0.119492	0.277949	1.13175	0.979939	0.701029	0.495951	0.378123	1.1003	3.44192	1.16055	1.19329	1.36046	0.762876	1.17894	1.43982	0.524388	2.31178	0.22138
AC062037.2	0	1.06211	0.447466	0.572818	0.965498	0.456214	1.52386	0.899376	0.325167	0	0	1.88876	0.142598	0	0.611551	0	1.1653	0.590735	1.27007	0	1.81792	0.44485	0.311578	0.811974	1.32103	1.57988	0	0.489656	2.79953	1.22705	1.15219	0.620376	0.86583	1.02188	2.73949	0.779912	0.643718	0	1.49022	8.15791	0.301266	0.563207	7.06319	0.396068	0.979329	3.5881	0.194465	3.42921	1.14935
AC062017.1	0.335254	0.284588	0.37301	1.05733	0.201211	0.543289	0.181471	1.76721	0.348507	0.694133	0.923346	1.27458	0.271703	0.28514	0.619033	0.713582	0.393186	0.609688	0.642803	0.354483	0.168381	0.317854	1.18735	1.48266	1.17987	1.09123	0.205877	0.641425	0.583426	0.237453	1.20745	0.332453	0.274956	0.943114	1.63118	0.0928769	0.638817	0.634553	0.916902	3.70094	0.681656	1.20727	0.350471	0.330165	0.320718	0.249255	0.555795	0.89842	0.437993
AC060780.1	1.71226	2.29478	1.59074	3.10721	1.21316	2.37683	1.77463	3.77609	3.70707	0.528753	0.457639	5.3446	2.38609	0.953937	3.61719	1.83638	1.49992	2.69146	1.518	1.74848	3.4542	1.49055	0.630219	3.69945	3.2253	4.20267	1.03315	1.99583	3.09723	2.07767	2.90959	0.969631	1.98125	1.98863	4.34172	1.56157	1.18366	1.61581	4.73446	3.09538	1.45877	2.917	7.68441	1.26236	4.23184	2.89569	2.7772	5.21263	2.42339
AC053527.1	0.507718	0.594241	0.238431	0.946195	0.257231	0.60773	0.463989	0.910536	0.797016	0.0993876	0.244828	0.570303	0.638254	0.350857	0.537674	0.597379	0.620927	0.335756	0.40605	0.211482	0.430521	0.474074	0.464865	0.721096	0.281562	1.17857	0.322416	0.365276	0.53702	0.555755	0.392921	0.297509	0.153785	0.353929	0.792425	0.277049	0.411604	0.268984	0.555841	0.248395	0.160528	0.450155	8.15447	0.295461	0.287008	0.159326	0.393756	0.986711	0.61243
AC053513.1	0.128524	0.288915	0.154916	1.27487	0.501392	0.293325	0.602935	0.578257	0.321643	0.115313	0.0852169	0.747312	0.507787	0.444082	1.5728	0.210319	0.365012	0.42851	0.0628149	0.220831	1.93807	0.30802	0	0.615765	0.718689	1.2502	0.149631	0.0968696	1.34305	0.622046	0.957346	0.0613651	0.371126	0.606482	0.812939	1.20862	0.297145	0.582556	1.05641	0.461113	0.149	0.974929	12.343	0.430952	1.3562	0.532381	0.71172	1.59426	0.636662
AC048382.2	0.224918	0.236385	0.199177	0.722426	0.393951	0.439987	0.452201	0.66722	0.289478	0.242156	0	1.21438	0.338524	0.444082	0.771275	0.286799	0.518701	0.321382	0.188445	0.147221	0.989016	0.264017	0	1.76698	2.84209	1.26583	0.25651	0.399587	1.03844	0.637218	0.444482	0.0460238	0.984911	0.758103	2.03235	0.347156	0.191022	0.540945	1.17925	1.44098	0.0894	1.08635	4.80331	0.117532	0.399594	0.709841	0.317389	2.0861	0.920886
AC048344.4	0.119989	1.21377	0.278924	0.35706	0.367787	0.568753	0.814183	1.24581	0.630591	0.678222	0.59668	0.610471	0.177774	0.248753	0.338848	0.937131	0.269029	0.436419	0.395841	1.20263	0.447676	0.246483	0.388438	0.862305	2.74483	1.18176	0.269408	0.271308	4.0718	0.297449	0.478803	0.515607	0.0799564	0.283102	0.487896	1.08033	0.148613	0.271933	0.378446	1.18384	0.751163	0.5071	8.23481	1.26186	0.339142	0.786954	0.242435	0.902527	0.604993
AC048341.2	1.64202	4.42151	0.997914	1.74587	1.18426	0.949594	1.65066	5.28177	1.49868	0.24265	3.20214	2.01249	0.72083	0.756477	2.45492	1.06332	1.32827	0.380589	0.472071	0.405682	1.95203	1.03617	6.71701	4.54717	7.20153	3.19451	0.610451	1.2376	2.64302	1.27703	3.52884	0.230588	0.429094	4.06411	4.30571	1.39145	0.478527	1.58444	3.54496	14.4969	0.492701	3.55876	14.3518	1.70769	7.53495	4.00099	0.63607	4.94547	0.546822
AC048341.1	0.312787	1.26652	0.310004	0.606095	0.691193	0.231781	0.744035	1.04603	0.423245	0.152717	0.161572	0.790403	0.335292	0.183477	0.882029	0.282438	0.399582	0.294337	0.295966	0.293714	0.5852	0.402206	0.596561	0.820505	2.17246	0.872979	0.241357	0.226155	1.16018	0.396713	0.95014	0.192757	0.215702	0.705812	1.25213	0.310003	0.288302	0.412138	0.917709	1.31467	0.308647	0.631397	3.86527	0.515531	2.24515	1.09979	0.287413	1.1922	0.59455
AC040977.1	0.8296	6.21631	5.76162	6.15654	4.26382	9.56387	4.67946	17.4185	7.95855	10.3709	16.6851	8.44158	5.40208	17.1351	6.73553	9.503	12.4831	10.3514	7.4334	4.38186	6.79231	4.9863	17.8381	17.1083	26.8969	17.5519	3.81736	8.23279	8.43083	5.25566	6.4247	11.0248	4.48397	5.60023	17.3246	3.09842	5.16038	6.56558	12.5278	14.2206	7.11707	10.4883	10.3974	7.08073	4.89807	9.29106	7.57392	12.6991	5.47938
AC040169.1	0.788908	0.260432	0.470226	1.60521	0.236742	1.02276	0.884563	1.89024	0.227804	3.46283	1.08639	1.27911	0.439562	1.71939	0.428438	1.8146	0.680318	1.57265	1.46813	0.903671	0.367926	0.685633	1.57164	4.17156	1.63502	1.32819	0.635858	0.617474	0.490321	0.472803	1.74354	1.43425	0.88965	0.536929	0.987029	0.0728516	1.65357	0.55013	0.487206	3.42914	2.15281	1.49936	0.247415	0.943418	0.754704	0.712226	0.599444	0.576581	0.676377
AC037459.3	0.419644	0.775343	0.694875	1.84749	0.852184	0.762956	0.855259	2.42325	0.707801	0.241376	0.121969	1.7214	0.677572	0.484647	2.04953	0.405357	0.644446	0.538392	0.817576	0.46752	1.42628	0.81874	0.2564	1.4585	1.7183	1.88724	0.458919	1.07235	1.35253	0.741027	0.984848	0.568152	0.59758	1.51229	1.54792	0.151823	0.46137	0.506234	2.20869	1.27871	0.447845	1.75669	2.65619	0.399525	0.552431	1.30172	1.40927	1.47469	1.495
AC036214.2	0.81025	0.274795	0.552136	0.501606	0.941545	0.980587	0.710531	0.608574	0.983658	0.371213	0.617242	1.37829	0.488129	1.50106	0.377301	0.615508	0.401988	1.06594	0.859407	0.592415	0.691439	0.66105	0.545686	0.430928	0.403127	0.830084	0.43008	0.623684	0.813452	0.769248	0.788815	0.716105	0.643314	0.671132	0.9658	1.36591	1.14447	0.759074	0.8502	0.64943	0.311779	0.605279	6.32568	0.882839	0.506752	0.35705	0.727599	0.545981	0.65878
AC034236.2	1.36483	1.08355	0.43621	1.7012	0.15322	0.672278	0.602105	2.01857	0.663463	0.803435	1.04166	1.72706	0.310349	0.637823	0.949709	0.920251	0.810161	0.660694	0.475091	0.449892	0.787639	0.853873	1.53989	3.5589	3.29437	1.97711	0.499716	0.521742	1.07895	0.737183	1.37919	0.618835	0.431839	1.10043	3.8506	0.424349	0.496183	0.635797	1.94824	2.18413	0.833252	1.71096	2.53537	0.431001	1.87609	2.53526	0.908186	2.64326	0.740013
AC027796.4	0.21705	0.66534	0.411116	0.789427	0.887065	0.190524	1.01823	2.14091	0.950576	0.311581	0.21587	1.57756	0.190565	0.474975	0.804498	0.726514	0.535318	0.345384	0.397804	0.0621562	1.09662	0.28486	1.09302	2.17022	1.45278	1.97937	0.198545	0.490776	1.30944	0.550874	1.19332	0.207265	0.265165	1.96309	2.45157	0.151997	0.537659	0.585603	2.44789	3.17978	0.226466	1.01139	2.99889	0.760868	1.5337	3.0219	0.227395	2.1768	0.345596
AC027020.2	0.218368	0.803254	0.246116	0.953937	0.361405	0.494884	0.818196	1.93748	0.794884	0.0641194	0.289573	1.18314	0.901964	0.896268	0.45316	1.1931	0.445097	0.595681	0.659754	0.280453	0.574013	0.629817	0.628373	2.47286	0.585311	1.34207	0.429216	0.374057	1.06075	0.389007	2.30958	0.322263	1.48159	0.437155	1.93729	0.333642	0.314719	0.317074	1.95047	6.06579	0.248554	0.610947	2.35612	0.0726153	0.321695	1.1695	0.380301	1.60322	0.583001
AC026979.2	0.39227	1.10626	1.37793	2.07522	0.612121	1.61147	1.26187	9.53048	4.3587	1.52041	3.53724	2.96514	1.18819	2.00597	0.886218	1.99578	2.28675	2.96052	1.61043	1.39294	1.86604	1.6922	10.6107	7.6973	4.82574	2.46117	1.17434	1.72959	2.7384	0.472323	2.12883	2.13514	0.522792	1.52712	3.26098	0.141274	1.24378	0.863612	3.1943	1.47774	3.71088	3.72374	1.49268	2.79803	0.576541	1.19158	1.6556	3.47856	1.83212
AC026471.4	4.7179	5.52583	2.54627	4.19088	2.39385	2.37353	4.95508	9.13898	1.74461	2.72929	1.2606	6.29515	2.41114	3.94155	3.62913	3.01695	5.08381	3.0734	2.83926	1.85518	3.64528	1.44651	4.96443	5.23654	10.7747	7.70588	1.33511	1.87083	4.43779	3.86528	7.53053	1.31122	1.92385	3.57203	8.33527	1.01441	2.37225	4.28604	5.4918	13.2003	2.15516	3.02175	7.94282	2.76895	3.74174	4.42386	1.86539	5.40807	1.83129
AC026401.3	1.30841	3.45037	4.12943	2.39421	2.91675	2.58651	4.55849	8.11376	3.7409	3.10685	7.1304	2.65753	1.86476	2.35333	2.5308	3.8076	4.06688	4.84041	4.09963	2.34051	2.64146	3.20322	5.75077	5.98117	6.92466	3.68747	2.87963	2.89769	3.46402	1.61224	4.25317	3.26049	1.24213	2.64304	3.88694	2.40989	2.37976	2.59971	4.78971	7.78089	5.51056	2.79688	4.53062	6.72014	2.04665	3.56369	1.25542	6.61309	2.64456
AC026367.2	0.0857604	0.595879	0.443016	0.302464	0.414222	0.271006	0.40232	1.7215	0.257547	0.0923334	0.379084	0.831098	0.470598	0.316077	0.70638	1.14823	0.922969	0.363913	0.335316	0.458435	0.346635	0.450213	0.904872	1.39342	1.48227	0.834223	0.285268	0.484786	0.831506	0.344207	0.790905	0.491365	0.152394	0.809374	1.70484	0.652042	0.169951	0.740422	0.688519	1.43587	0.477231	0.334563	3.03028	0.836542	0.517114	1.97357	0.436403	0.497949	0.910339
AC026356.1	0.186393	1.07131	1.58872	1.32504	1.7919	1.55842	1.76834	0.677349	1.6268	1.99425	1.66842	1.40555	0.705737	0.289815	1.14322	1.13342	0.459708	1.4936	1.2469	2.69554	1.77118	0.973185	1.0392	0.975526	1.30286	2.05676	1.5694	0.500481	3.38853	1.21292	2.54127	1.13469	0.543403	1.12693	1.66319	1.94394	0.911894	2.12723	0.654694	0.89861	2.52823	1.49974	17.5417	2.87638	3.01611	2.12325	0.711365	1.73406	0.989276
AC025917.1	0.535218	0.560219	0.134868	0.552478	0.407407	0.398763	1.02357	0.786118	0.509635	0.0421638	0.0692432	1.00572	0.541541	0.649511	1.43773	0.466078	0.491716	0.32049	0.153121	0.373827	0.779275	0.33073	0	0.734196	0.384891	0.685703	0.299614	0.354202	1.00411	0.859873	1.36131	0.0373967	0.400145	0.662197	1.46266	1.20668	0.323365	0.456451	1.04804	0.421513	0.145284	0.712962	8.94127	0.119376	0.516554	0.630856	0.492344	1.38499	0.734411
AC025857.2	0.332111	2.11753	2.47047	0.790633	3.03544	0.769622	6.54362	5.65511	1.49604	0.357566	2.20203	5.69669	1.31214	9.63919	1.92266	1.18576	1.60841	2.1743	0.779116	0.608678	6.07161	0.773192	0.860112	1.82637	2.09348	6.39653	1.12681	0.826037	3.69232	1.36432	6.71464	0.951417	3.09831	5.01494	8.64272	2.79086	2.96164	2.40855	5.78973	6.43427	0.831645	2.41848	24.0114	1.94373	3.82988	4.76906	0.954348	3.89172	3.59584
AC025627.1	0	0.92935	0.357973	1.80438	0.241375	0.912428	0.304771	1.57391	1.1706	0.139891	0.114868	3.02201	2.85195	0.508808	1.29955	0.657202	1.04877	1.5556	0.508026	0	3.09046	0.548649	0.28042	1.54275	2.53197	2.46462	0.0864402	0.954829	1.74971	0.90495	0.0691312	0.279169	0.57722	3.72986	2.66122	0.649926	0.450603	0.420671	3.20397	0.388472	0.150633	3.77349	7.29863	0.514889	0.416215	0.388711	3.13088	2.43474	1.19533
AC025580.3	0.0222029	0.190569	0.206451	0.704759	0.433084	0.280649	0.357115	1.70591	1.65027	0.239047	0.544694	0.85529	0.635981	0.199463	0.517285	0.525181	0.985677	0.444158	0.227881	0.101731	1.63607	0.364877	1.11809	1.09613	0.711073	1.21487	0.265876	0.451831	0.724752	0.196574	2.27994	0.111311	0.0591812	0.694111	1.04325	0.46645	0.208997	0.848236	1.76981	0.278805	0.432435	0.63519	13.699	0.162433	1.33042	1.30291	0.897214	1.01961	0.259251
AC025287.3	0.410201	0.348208	0.358598	0.959842	0.175852	0.23266	0.824716	0.524187	0.426417	0.0679446	0.041843	0.825624	0.747997	1.00304	1.15841	0.253482	0.424486	0.17215	0.18506	0.144576	1.03011	0.302486	0.0453996	0.591558	0.513294	1.15101	0.251902	0.392409	0.999394	0.782214	1.24234	0	0.546688	0.70726	1.48262	0.0378799	0.437711	0.694682	1.19426	0.962263	0.219485	1.10787	6.08924	0.0577106	0.85618	0.69709	0.283352	1.499	0.435424
AC025181.2	5.81485	2.00603	1.14043	2.42448	1.16444	1.70255	2.12021	2.4559	3.31493	2.48299	3.71172	1.28939	1.272	2.61532	2.40751	1.28437	1.30818	2.56304	1.87857	2.39335	1.70987	1.70064	2.97786	2.58678	1.54312	1.40929	1.43591	1.58222	1.50344	2.12209	2.95747	1.83522	3.12613	1.83703	1.42489	0.757221	2.49996	4.49276	2.21551	2.75805	2.93415	3.22966	2.03588	2.55963	5.23703	2.44948	2.17718	1.43582	2.0505
AC025171.4	0.13589	1.31446	0.0623974	0.539171	0.353417	0.286278	0.591952	5.2674	0.430762	0.877829	1.68187	1.42664	0.12925	0.500833	0.874103	1.38814	1.05623	0.356961	0.531317	0.190248	0.746421	0.372196	2.80242	2.62308	5.3268	2.0709	0.195873	0.290192	1.21995	0.224578	1.81555	0.432545	0.261596	0.944044	2.12835	0.870045	0.269292	1.21233	1.45464	3.49402	1.17629	0.294514	6.77142	1.02176	1.98017	1.16748	0.189821	2.58223	1.50657
AC025171.2	0.444667	1.32113	0.276823	1.25915	0.55282	0.540448	0.916936	3.33836	0.445126	0.889982	0.869379	1.88944	0.50678	2.06433	1.72262	0.880317	1.04301	1.0834	0.526599	0.306918	1.77603	1.38578	1.36159	1.66728	3.84859	1.3725	0.722491	1.13435	2.14831	0.646049	2.4508	0.449118	0.820555	1.62753	2.09142	0.766505	0.576166	0.856412	2.54998	1.51354	1.11826	0.763569	7.84049	1.31375	3.03573	1.42474	0.921481	2.67214	2.44477
AC024361.1	0.418605	0.452887	0.203521	0.358234	0.247014	0.0778122	0.420807	0.869257	0.998295	0.0795333	0.195919	1.61074	0.356716	1.83775	0.486764	0.417601	0.640431	0.380635	0.0361039	0.112823	0.780906	0.18547	0.744001	1.23103	0.525736	1.47308	0.0491444	0.306226	0.748068	1.08131	0.183417	0.105812	1.37831	0.900513	1.0235	0.354726	0.170789	0.159444	1.52504	0.618409	0.0685121	0.512326	3.01176	0.315251	1.19708	0.441992	0.33168	0.974815	0.470484
AC024337.2	0.0508675	2.69582	0.33868	1.96595	0.447281	0.619159	0.664756	3.43882	0.678934	0.206895	0.487171	1.93073	0.770394	0.171854	0.941706	0.933302	1.03913	0.49337	0.629811	0.653888	1.16508	0.274778	2.79741	3.3766	7.56218	2.63073	0.231244	0.894581	2.26505	0.272215	1.3893	0.429073	0.0903905	0.526742	4.78022	1.4995	0.240809	0.365976	1.51038	1.095	0.691931	1.46994	1.64374	0.454834	0.485638	0.756982	0.654728	2.19276	2.3638
AC024075.3	2.55071	2.25475	0.766066	2.00056	1.22318	1.31215	1.52059	1.72451	1.91501	0.638654	0.629294	4.2683	1.19135	1.10679	2.78497	0.767739	0.798001	1.02483	1.30462	1.01922	2.18552	1.52317	0.426739	1.44571	1.47759	1.86088	1.0951	1.91131	1.76376	3.46619	2.43019	0.552286	0.948677	1.53953	1.39361	0.712114	0.793476	2.30462	3.06152	2.0218	1.56794	1.69702	9.43195	1.35614	1.87781	1.43333	3.19608	1.1272	1.16488
AC024075.2	6.34272	4.72417	2.46152	4.55629	2.6915	2.6453	3.34447	8.53552	2.98125	2.41494	2.94597	7.89396	2.33209	3.30773	4.90227	4.53107	2.90679	2.73243	4.406	3.02418	3.78394	2.00621	4.70963	7.31034	11.948	6.65524	1.71355	3.83414	4.41197	5.77705	3.66588	4.22744	1.73068	4.11475	5.39184	1.94545	1.71206	3.94721	6.3637	5.21734	4.68813	4.18678	10.3554	2.51247	2.35391	4.60855	3.40201	4.57158	5.10367
AC024075.1	3.38754	3.3371	1.04696	3.67611	1.58131	1.89087	1.65902	1.44295	2.69544	0.592276	0.307156	6.4815	1.65868	2.04082	4.55835	0.74946	0.908835	1.31635	1.48581	0.895459	3.1057	2.3394	0.124974	1.04942	1.38353	2.40802	1.58909	2.0622	2.6575	5.14726	3.51227	0.663552	1.58207	2.52756	1.77902	1.04274	1.00409	2.32474	4.81501	1.66203	0.926419	2.29667	12.67	0.847267	2.25865	2.1188	4.34198	2.24657	2.12062
AC024060.1	2.24007	5.2579	0.760421	2.20083	1.42675	0.876411	3.02392	3.5884	1.48958	1.79159	3.01295	3.30277	0.99039	2.03451	3.1178	2.45649	1.5498	0.669261	0.750727	1.68619	2.14912	1.16135	3.223	8.47916	7.06019	6.02338	0.926083	1.33862	3.10272	1.88125	2.82636	0.7334	2.00449	4.19044	6.47718	3.30384	1.23662	1.65771	4.25748	7.86459	0.89038	2.4552	9.56772	0.877925	2.42404	2.34183	1.1782	5.5742	1.69844
AC023794.2	3.44314	0.844361	0.154664	0.197991	0.133488	0.0315375	0.27088	0	0.359655	0.644702	0.47644	0.652837	0.0591456	1.98626	0.274793	0.427591	0.0537039	0.680613	0.219495	0.137183	0.642316	0.184512	0.818482	0.972934	1.18717	0.174744	0.209143	0.169247	0.599937	0.614978	0.796493	0.128658	0.47883	0.176603	0.811619	0.107829	0.148331	0.58161	0.583763	1.82611	0.833045	0.233603	0.97654	0.438076	0	0.124021	0.241976	0.426703	0.190689
AC023669.2	0	0.729926	0.136674	0	1.76941	0	1.13037	0	2.78093	0.213642	0	0.09615	1.82931	0	0.186792	0.0590398	0.177964	11.9086	0	20.9115	0	0.135875	0	0.413348	0	0	5.08243	0	0.98335	0.140546	0.0703847	0	0	0	0.119536	0.635242	0.720928	1.79886	0.151724	0.593273	0.0920184	0.172026	16.8995	3.14535	10.619	0	0.475177	6.17975	4.28291
AC023669.1	0.0301689	1.18373	0.124676	0.119701	1.71496	0.0953348	0.485241	0	2.4915	0	0	0.0438547	1.52966	0	0.0212993	0	0.0811707	11.2473	0.0884683	17.7626	0.0844199	0	0	0.716417	0.214709	0.0440196	4.87711	0.0682154	1.32604	0.149576	0.128412	0	0	0.0711806	0.054521	1.62978	0.627748	1.44559	0.242208	0	0	0.196155	23.6159	2.42781	9.4139	0.166623	0.243823	4.92066	4.70753
AC023510.2	0.127146	1.76687	0.262722	0.308293	0.283437	0.647322	0.447352	2.59625	0.731845	0.775716	0.702526	0.800906	0.502341	0.790775	1.33152	0.832256	0.760205	0.481721	0.124283	0.242737	1.6208	0.783557	0.609791	2.14531	2.13295	1.91704	0.422931	0.574985	1.80806	0.570348	0.766683	0.151768	0.649566	0.724974	5.51466	3.07818	0.188973	0.411649	0.899259	1.86269	0.501167	1.0747	9.446	1.00769	1.07812	1.84335	0.666029	2.28185	0.449882
AC023509.4	0.611942	0.850377	0.505781	1.10609	0.431983	0.880935	0.635665	2.79561	2.08275	0.636882	1.21723	0.859891	0.577566	2.02983	0.82086	1.21988	1.13423	0.797556	2.27301	1.05144	0.570787	0.977714	2.0544	0.66285	1.86648	1.51791	0.569948	0.94551	0.975682	1.14135	1.56281	0.934967	1.03304	0.986609	0.847854	0.0734626	0.242536	0.633993	0.608266	1.75639	0.879696	0.848808	1.71871	0.559606	0.922465	1.15475	0.860914	0.839825	0.974357
AC023421.1	0.0354252	0.456084	0.00914988	0.0117131	0.0197427	0.00932875	0.00890288	0.110344	0.0132982	0.00953509	0.0352325	0.102991	0.0233269	0.159123	0.0312628	0.0158101	0.0238283	0.0241589	0.0259705	0.466653	0.0495642	0.0121285	0.0127424	0.0110689	0.0900421	0.0387668	0.00883772	0.0200251	0.0801434	0.225819	0.0188481	0.0126856	0.0472124	0.0313434	0.256081	0.0425274	0.0263257	0.0458771	0.0101574	0	0.0246413	0.0575828	0.0240716	0	0	0.110055	0.0636232	0.0981695	0.0470045
AC022400.5	0.079573	0.894377	0.205527	0.789307	0.369554	0.433059	0.599936	0.963886	0.716896	0.171344	0.0879336	0.790414	0.296919	0.568216	0.870768	0.248591	0.34493	0.217065	0.175007	0.303828	0.606142	0.372326	0.190815	0.712748	1.01127	1.08365	0.0794061	0.404829	1.08869	0.422699	1.51002	0.0379928	0.229774	0.95437	1.27027	0.652762	0.302238	0.343501	1.0039	0.642347	0.16605	0.586359	3.96515	0.41235	1.04957	0.9339	0.404917	1.05005	0.549029
AC022150.4	0.488465	0.639767	0.734046	0.535911	0.754804	0.713315	0.602632	1.50996	0.983495	0.233071	0.147215	2.62235	0.716393	0.230149	1.28146	0.431045	0.65214	0.610717	0.423207	0.489582	1.72409	1.26187	0.207646	0.881064	0.750577	0.55074	0.531753	0.665196	1.05842	1.11654	1.96098	0.166966	1.08746	1.66325	0.952969	1.13281	0.302496	0.668525	1.59792	0.726884	0.610042	0.78677	21.3934	0.791859	1.34924	1.41021	0.752663	1.84585	0.872025
AC022150.2	2.50383	1.35444	1.09053	3.44136	1.28596	2.22369	1.70267	4.99545	1.58494	0.740006	1.00911	4.17491	1.27696	1.18744	2.65156	2.0377	1.71719	2.25439	1.15174	0.81543	2.35834	2.00021	0.918284	2.33169	3.39419	3.08028	0.783868	1.69289	2.74498	2.03421	2.22029	0.738382	1.47218	2.0271	2.04064	0.442031	0.705357	1.52591	5.01137	2.95034	2.32218	2.52175	4.40353	1.48157	2.85853	2.67761	1.54304	2.64326	2.05849
AC022144.1	0.380204	6.6125	8.26963	10.7186	2.14121	5.24848	2.62514	16.7668	8.30803	6.37716	5.45313	16.5659	2.81323	0.373366	3.58841	5.75137	9.00023	6.6778	5.83869	0.561582	8.07261	3.5009	19.5349	14.3558	27.1707	10.2776	3.15507	2.85054	10.5029	2.04094	8.11286	4.28511	0.933416	4.62692	8.26331	2.99081	3.94569	4.63875	7.63109	5.68964	8.24019	9.91423	12.292	3.56838	12.7711	4.10304	6.35223	11.1065	2.61267
AC021087.3	39.1288	2.64634	0	0.0741413	0.374901	0.501916	0.958006	0.174613	0	4.28521	1.82129	0.122233	0.129197	5.88834	0.178098	0.0500373	0.804415	0.0509736	0.452067	3.11435	0.130721	0.0191927	0.806567	1.12102	0.569947	0.0817953	0.419557	0.538708	0.688466	15.6637	2.26679	0.0802969	2.46547	0.198397	1.46897	0.100946	0.277727	0.290393	0.128589	0	12.8289	0.218692	0.838024	1.38413	0.221825	0.580522	0	0.0443852	2.05294
AC021078.1	2.54261	3.75731	2.00469	2.3968	3.56447	1.21476	4.12932	3.81261	1.7069	0.579425	0.78649	4.12445	1.86472	1.59894	3.41183	1.73359	2.25407	1.00202	0.931335	0.790502	5.16667	1.67459	0.89548	4.06097	6.18818	4.27885	1.88332	1.24586	6.34443	2.48545	3.26271	0.568977	1.54428	3.69704	8.08176	6.40579	1.35308	5.08735	3.68667	2.8076	0.81491	3.69913	17.3692	1.86816	5.24635	4.30183	1.37587	8.91932	1.99556
AC020916.1	4.91008	54.3046	16.443	16.9479	25.0698	3.38856	24.4377	23.0568	8.64388	1.6598	4.5141	8.17378	5.1344	1.17003	9.66977	40.9714	3.41259	3.92991	24.9165	2.90915	123.864	3.14246	14.3087	11.1821	26.7634	18.3854	3.83268	4.28173	14.6823	8.31873	4.76969	16.2361	0.676948	6.75959	89.6525	0.759542	2.40166	6.04717	15.8314	7.24147	1.6736	11.0086	9.32502	3.94416	5.89378	7.03799	2.8808	80.9276	24.2155
AC020915.2	0.603597	0.810586	0.356346	0.836314	0.192222	0.544968	1.01129	1.31309	0.172634	0.557022	0.304922	1.96373	0.511018	0.0794503	1.0552	0.718353	0.257779	0.496576	0.210715	0.230468	0.93834	0.432988	0.330839	1.07771	1.6657	0.96459	0.200777	0.227467	0.780306	1.03825	1.19283	0.576386	0.574596	1.62758	1.92191	0.345052	0.170878	0.595569	1.58234	1.85619	0.119958	0.6354	10.4685	0.630829	1.75478	1.38903	0.438783	1.63854	0.579693
AC020910.4	2.60547	2.22552	1.24006	1.39386	0.848387	1.11012	0.824011	2.61402	0.835199	1.22923	2.13516	3.87253	1.1759	1.25428	1.03341	2.09045	1.94289	2.26266	2.14618	1.44195	1.03764	0.922103	2.77997	3.36618	3.27403	1.62318	0.73034	0.695039	1.72197	1.24409	1.68219	1.29992	0.585237	1.20875	1.79879	0.351442	1.2473	0.909897	1.47734	3.93867	2.68796	2.05571	1.27312	1.87399	1.78728	1.4956	2.28712	1.15895	1.18086
AC020907.4	0.661192	1.58459	0.372605	1.23221	1.07196	0.379889	2.80974	0.998547	0.767173	0.258861	0.239126	1.22326	0.435384	0.332302	1.69746	0.912087	0.539081	0.300609	0.176264	0.344262	1.42968	0.329268	0.345934	1.54008	4.12507	3.59588	0.329902	0.475692	2.3506	0.957904	2.71837	0.129147	0.440597	1.38274	3.53039	0.108239	0.536024	0.622743	4.68786	2.26436	0	1.09429	4.49283	0.384774	1.66495	1.6184	0.323861	3.23624	0.669947
AC020594.1	0.0935414	0.172044	0.0966422	0.24743	0.625574	0.246329	0.470167	1.7482	0.421371	0.151066	0.248087	0.747865	0.153989	0.0646415	0.396242	0.542712	0.545301	0.127585	0.137152	0.107149	0.479878	0.256206	0.336467	1.92904	2.6629	1.09189	0.0933452	0.211508	1.05811	0.19876	1.69215	0.334966	0.311665	0.993159	1.01428	0.280737	0.278056	0.847981	0.80463	2.26532	0.130133	0.182459	5.21207	0.171083	0.687414	0.387473	0.209999	1.03688	0.496467
AC020558.2	0.119309	0.999657	0.205441	1.07827	0.310295	0.251348	0.899527	0.330337	0.656879	0.149863	0.105476	0.89607	0.353534	0.137414	1.01079	0.248487	0.267506	0.198893	0.174934	0.0911103	0.797547	0.122544	0.257493	0.52191	1.1928	1.13155	0.119059	0.179848	0.655513	0.366186	0.740588	0.227861	0.21201	0.375332	1.11401	0.047743	0.216732	0.28327	1.16312	1.24849	0.16598	0.74988	0.702618	0.145474	1.05663	0.658947	0.303561	1.44846	0.591014
AC019197.1	3.05547	0.432036	0.0380332	0.132152	0.00586172	0.110791	0.105733	0.0546028	0.102656	0.0283103	0.0278954	0.0305786	0.0727219	1.53363	0.0668312	0.0798	0.216959	0.0812932	0.138795	0.39156	0.206023	0.0324093	0.0680994	0.223477	0.197832	0.115101	0.0314877	0.107021	0.149569	0.43208	0.17348	0.143124	0.210265	0.124081	0.275616	0.0505066	0.0573193	0.0612954	0.0422212	0.103773	0.043897	0.253031	4.87425	0.230842	0.0356742	0.152488	0.127508	0.507993	0.161889
AC019080.5	1.27387	0.97302	0.690411	1.54668	1.04744	1.58379	0.461844	1.90805	1.37971	0.854379	2.52003	1.82139	0.687558	1.9915	0.914095	0.484641	0.580598	0.873487	0.826717	0.310972	0.58436	0.643476	1.71265	1.07012	1.33761	1.18835	1.2712	0.731897	1.07987	1.18328	1.13331	1.07685	1.36375	0.468081	0.981234	3.35935	0.84837	0.703157	1.00595	0.786694	1.4526	1.05908	8.79789	1.2986	1.51104	0.519019	0.618845	1.32276	0.908856
AC018926.3	1.01237	1.24131	0.321823	0.463475	0.564198	0.369129	0.352278	2.02138	1.11086	0.167686	1.13595	1.24521	0.358953	2.36785	0.714732	0.34755	0.45397	0.389458	0.399633	0.31221	0.944283	0.853178	0.22409	0.437986	0.277112	1.36352	0.116567	0.440208	0.830551	0.606725	0.828667	0.390409	0.415143	1.28616	0.774037	1.0751	0.308646	0.554678	1.51836	1.11757	0.487516	0.253166	10.054	0.356071	0.616302	1.61288	0.769237	1.17151	0.413315
AC018752.1	0.306961	0.940951	1.34783	1.42092	1.11196	2.34419	0.540007	0	1.03706	0.330488	0.407056	2.78882	0.859047	0.954561	3.19654	0.136995	0.344122	0.767573	1.01266	1.31856	2.72001	1.83915	0.110413	0.287738	0.0780219	0.783805	1.30185	1.99547	1.73612	2.17414	1.55154	0.439684	2.14776	0.814776	0.693422	3.86927	0.760379	1.29197	1.2322	0.275325	0.854074	1.29729	21.4839	1.5439	3.47044	1.05959	4.82386	1.09369	1.7921
AC018730.2	0.570962	3.01911	7.59481	12.2238	3.182	8.15676	1.5784	6.59508	3.26856	1.65207	2.98125	11.464	7.82484	2.26873	5.76936	2.48447	4.89663	7.23595	8.99941	4.41463	6.98989	5.71778	3.64539	4.01405	8.92514	7.2375	5.05665	6.45506	5.39747	3.2352	5.39213	3.83359	2.66329	6.06208	7.35184	2.74172	3.53585	3.28117	10.4775	2.49657	2.43257	10.9978	3.87971	5.28657	3.55035	2.75925	11.7285	8.41976	8.37135
AC018690.1	0.55557	1.17664	0.521806	1.26917	0.591098	0.478806	0.736194	1.25855	0.34127	0.299076	0.200927	0.807599	0.332576	0.279218	1.03407	0.495897	0.79269	0.344438	0.99972	0.491755	0.7302	0.726257	0.181671	0.410311	1.89995	1.73181	0.579605	0.456804	1.20791	0.482931	0.779291	0.361721	0.302902	1.34061	1.36912	0.485057	0.475419	0.654079	1.21646	0.906021	0.421579	0.952324	3.84376	0.508056	0.628116	1.11579	0.408189	1.79951	0.723763
AC018653.3	0.294985	1.24949	1.26061	3.26297	2.25672	1.46886	1.36137	4.48277	2.51667	0.73624	1.29799	4.05412	1.50096	2.14967	1.35369	0.753997	1.53924	1.64594	1.47447	0.307178	2.8265	1.56081	2.45008	3.15056	4.22602	3.13028	1.45845	1.83424	2.3834	0.626795	3.09615	1.6517	1.39385	4.03357	3.41665	0.482897	2.17885	1.84063	5.25938	4.30548	1.17517	3.2431	6.92441	2.64852	3.98688	3.44354	2.17936	4.14036	0.939371
AC018638.7	0.454104	2.3142	0.13195	0.713194	0.237258	0.209269	0.813127	1.59127	0.44747	0.183341	0.225817	0.721988	0.44853	0.686453	1.06198	0.924657	0.649074	0.167746	0.332908	0.195061	1.11186	0.194339	0.347099	0.780389	2.20745	2.11199	0.0991269	0.352957	1.52265	0.502551	0.921129	0.162612	0.283687	0.887266	2.61583	1.94208	0.112487	0.349175	1.2695	1.45102	0.118451	0.793495	4.89848	0.103817	0.561532	2.05736	0.395039	1.55053	0.964055
AC016957.2	0.111853	1.00575	0.269641	1.01088	0.561025	0.68728	0.730865	2.09041	0.27992	1.12397	1.38437	0.867164	0.257786	0.747189	1.19768	1.7139	1.05331	0.508534	0.710668	0.811451	0.730312	0.421244	1.34111	1.81737	2.46395	1.95846	0.539487	1.22241	0.747092	0.541357	1.22991	0.720968	0.223605	0.923669	1.17915	0.604248	0.387901	0.820839	0.726951	2.54156	0.959574	0.79998	5.06695	0.750101	0.484756	1.20979	0.502214	1.5941	1.12794
AC016773.1	0.394227	0.942593	0.224012	0.495323	0.153793	0.0622886	0.75297	2.37404	0.414366	0.212221	0.444361	1.00286	0.168735	0.136215	0.918471	0.563013	0.282849	0.143387	0	0.0677363	0.3861	0.175463	1.33295	1.47816	1.96397	1.55309	0.17703	0.356557	0.458676	0.195456	1.36337	0.0564682	0.23643	1.3022	1.70986	0.0473263	0.195309	0.587122	2.44158	4.031	0.0548439	0.897129	1.23224	0.396562	0.668557	1.41526	0.141605	1.31097	0.209234
AC016394.1	0.279942	0.504781	0.22117	0.696929	0.275318	0.312221	0.364183	1.91492	1.0385	0.177293	0.109184	0.670246	0.314457	0.637258	0.825435	0.455652	0.457826	0.164708	0.241445	0.226352	0.56831	0.259342	0.497551	1.46127	1.05476	0.648739	0.295788	0.502662	0.819592	0.478198	1.2266	0.212285	0.329196	1.01017	1.07134	0.296529	0.310013	0.213257	1.17096	1.41792	0.320722	0.942199	10.1601	0.512001	0.856403	1.00043	0.369685	0.860518	0.436995
AC015982.1	0.679935	0.666962	0.667351	1.43882	0.378932	0.429724	0.444282	2.89444	1.63353	0.695446	0.991815	0.790705	0.940224	0.375894	0.984071	0.485523	0.548819	0.61826	0.498467	0.545192	0.665918	0.907877	0.978288	2.54942	1.79736	1.28973	0.441031	0.730272	1.14269	0.433426	1.41087	0.535658	0.589013	1.12297	0.921581	0.285688	0.640026	0.4843	1.32571	0.975775	0.804023	1.10522	1.20125	0.683963	1.96024	0.563294	0.915866	1.61505	0.216524
AC015922.2	5.14801	6.6474	7.34258	5.54329	4.46856	4.3669	6.91538	2.83809	1.23133	3.82585	1.69157	2.31785	4.31984	7.61876	7.30116	2.35853	5.31158	7.53939	6.21216	14.4552	8.8812	7.29965	1.31096	2.22064	0.972688	3.52309	3.81881	9.58004	4.00486	7.58287	1.26043	3.26279	13.5397	8.43788	3.95191	5.46912	6.95166	5.72291	4.75482	1.47104	2.34501	8.17543	5.57219	3.58288	2.67834	6.03877	12.6822	6.56491	7.01206
AC015911.3	0	0.456622	0.230849	0.394023	0.622627	0.470723	1.01078	1.70129	0.363468	0.120284	0.444453	1.94882	0.331048	0.283083	0.591562	0.930729	0.784874	0.321692	0.245711	0.149302	0.851027	0.968995	0.321487	0.884341	0.643658	1.92898	0.260135	0.399972	0.782319	0.316518	3.24947	0.266711	0.198525	2.59201	1.27871	0.961187	0.811787	0.723416	3.9081	2.70558	0.699405	0.968531	6.93355	0.51083	1.17889	0.899843	0.267532	0.943538	0.296477
AC015871.3	4.31395	3.34348	1.0113	2.79265	1.15339	1.27411	2.02423	2.9183	1.95273	0.820519	0.723194	3.59791	1.65744	2.38685	2.06828	1.48532	1.08481	1.25245	0.891883	0.96107	3.11733	1.5033	1.11664	3.48671	3.70357	3.42781	0.865167	0.916941	3.70136	2.41665	3.4745	1.21181	1.98478	1.93009	3.99284	2.7363	1.27472	2.20029	3.37601	1.91899	2.31499	1.87296	9.59696	1.57289	2.10268	2.14318	1.53198	4.22941	1.8777
AC015849.3	0.518311	0.635527	0.502024	2.18504	1.87758	0.921309	1.79107	4.17067	1.21605	0.418528	0.343662	4.85026	1.32253	0.716355	2.97317	0.98311	0.90064	0.913138	0.569968	0.705031	3.29353	1.04254	0.326263	1.61951	1.74558	2.97782	0.355592	0.622606	2.42894	1.51433	2.68875	0.0464011	0.863464	2.02544	2.45881	0.81667	1.02713	1.42637	3.71537	1.80146	0.225332	1.97988	16.6412	0.29624	2.60034	1.74442	1.39632	3.84732	1.78809
AC015813.1	0.391676	1.52747	0.626661	1.09719	2.89226	0.681888	2.39249	3.78993	1.5234	0.47148	0.24527	2.28533	1.79464	1.81196	2.30629	1.38872	1.60025	0.462499	0.921246	1.36465	2.40005	0.48238	1.60453	1.57738	5.11323	3.09164	0.257856	1.06091	3.74483	1.34277	2.02315	0.233762	0.909876	2.13704	4.655	1.59999	0.741147	1.52524	3.13206	2.98613	0.18163	2.30613	8.24313	0.42285	1.65751	2.46368	0.96968	3.87214	2.83815
AC015726.1	0.588855	3.97114	1.38054	2.00691	1.43891	2.17094	1.29774	3.95055	1.08824	2.12142	2.28254	3.42393	1.31239	4.06927	2.95809	3.3558	2.13277	1.60633	3.35394	2.20515	1.58438	1.61285	3.12828	3.3968	7.06914	4.3621	0.768426	3.07263	2.12271	1.18706	1.68701	1.88157	0.271657	2.96572	2.333	2.06636	1.23425	1.55452	3.03915	3.65653	2.14253	2.47392	2.40078	1.11841	0.94741	3.37734	2.21684	3.5147	3.84655
AC013403.2	0.263475	1.49415	0.238183	1.00183	0.36709	0.624443	0.695259	2.18848	0.39562	0.319127	0.305716	1.19687	0.238554	0.409666	1.09283	0.911304	0.738428	0.329417	0.144867	0.56588	0.460792	0.586337	0.473858	2.34627	1.74119	1.10526	0.262922	0.484045	0.808948	0.443208	0.595777	0.377395	0.307249	0.621644	1.24989	0.553521	0.358962	0.383863	1.24651	1.24068	0.18327	0.685236	5.28146	0.421648	0.335114	0.909484	0.443623	1.25166	0.559353
AC012615.6	0.431609	0.545015	0.312807	1.81474	0.57442	0.325708	0.667008	1.85941	0.425606	0.228877	0.0427126	2.38788	0.343594	0.258197	1.08243	0.4255	0.462195	0.386602	0.302249	0.132823	1.20174	0.25584	0.250253	1.86792	2.61326	2.34047	0.16071	0.466111	1.04931	0.42433	1.25445	0.138409	0.55805	1.32992	2.30508	0.0618675	0.331914	0.58398	2.37166	0.647137	0.0985804	1.42408	4.11468	0.400587	0.961371	1.20968	0.555342	2.40743	0.403445
AC012615.1	0.997919	2.47704	0.641231	2.60745	0.461195	0.666585	1.24784	2.83037	1.29742	0.681329	1.11353	2.83047	0.777316	0.824167	1.63245	1.48818	1.18967	0.77461	0.785114	0.933986	1.18053	0.933307	2.27627	5.71903	5.71632	3.19625	0.740797	1.05941	1.99803	0.629229	2.58998	0.766993	0.989361	2.16786	2.77113	0.496726	0.385867	0.661934	2.05178	3.7331	0.643349	2.31049	2.08389	0.556447	1.43092	2.18444	1.01634	2.38962	1.0722
AC012557.1	1.19016	0.697936	0.427693	0.547505	0.20187	0.408801	0.754268	0.91336	0.388498	0.139281	0.343099	0.865035	0.340741	0.321832	0.584527	0.254035	0.348064	0.329368	0.303485	0.503828	0.77226	0.372043	0.335035	0.711419	0.447189	0.528523	0.335645	0.585023	0.501716	0.531437	0.853486	0.185301	1.06894	0.57993	1.54301	0.621206	0.179454	0.234548	0.830881	0.742611	0.215965	0.571964	10.2673	0.473208	0.614285	0.214347	0.487912	0.819419	0.357034
AC012510.1	0.583186	1.71107	0.753147	1.5977	0.882178	1.20665	1.57032	5.01707	1.15715	1.63698	2.90007	0.666083	0.548597	1.35296	1.14696	2.62132	2.35363	0.833307	1.77123	0.858885	0.777093	1.11242	4.31529	1.66603	4.27753	1.8842	0.789806	1.50703	1.64247	0.545827	0.975185	2.23752	0.80499	1.37597	1.58089	0.700105	1.13506	0.83617	1.64827	2.35386	2.57882	1.19171	0.622721	1.56183	0.777077	1.81178	0.654621	1.814	0.55272
AC012409.3	0.048344	2.11421	0.449519	1.27877	0.520887	0.797793	0.712775	6.29105	0.459742	0.190848	1.0471	1.4992	1.15663	0.089088	1.27422	1.79798	1.08393	0.498201	0.685201	0.682979	1.17241	0.375168	2.48087	4.18927	3.86658	2.8921	0.19297	0.746962	1.84367	0.399479	1.33752	0.276987	0.451008	0.798442	5.50412	0.696435	0.319344	0.667814	3.25286	1.76337	0.582877	0.859164	5.91299	0.618932	0.619443	0.534009	0.940606	1.50557	2.06978
AC012409.1	0.0210499	1.2389	0.739422	2.088	0.140775	0.997778	0.359731	1.87959	1.16948	0.407939	3.01471	1.31576	1.10888	0.727325	1.33751	1.91647	1.83122	1.3207	1.66664	0.192897	0.844274	0.648617	2.54407	3.28862	2.05454	1.84284	1.11331	1.49929	1.9593	1.22256	1.45596	0.693483	0.673295	1.24163	1.44557	1.16243	1.14715	0.408908	2.12454	0.528653	1.55206	0.574831	17.2786	0.731487	0.0475972	1.88921	2.21162	1.4	0.82674
AC012368.1	0.0644456	3.54009	1.53138	2.96614	0.416625	2.02293	2.66264	5.39314	3.11593	1.15179	1.85448	1.42395	1.86295	1.88828	2.44783	1.88677	2.13274	2.4026	1.18114	0.2879	2.52468	1.4077	2.19756	8.86011	4.74378	1.91827	1.44055	0.823313	6.44006	0.369728	3.27112	0.44309	0.953366	0.805882	5.54376	0.851025	1.37928	0.817906	6.21613	3.89596	0.313793	3.08398	4.60682	3.54782	0.641175	1.51272	1.11692	1.99	1.92228
AC012313.1	1.87833	1.09483	1.19495	2.85747	0.670367	1.80309	0.804581	2.11355	0.944765	0.617646	0.638042	2.87164	1.32215	4.97465	2.05448	1.05302	1.17007	0.853976	1.80437	1.33546	1.7218	1.17529	0.951877	1.78672	1.95674	1.58635	0.895644	1.25008	1.24701	2.75907	2.61904	0.954257	2.33684	1.6046	1.53839	0.666474	0.838887	1.31811	2.6053	1.56025	1.00404	1.58825	2.188	0.973074	1.14026	1.39257	1.74489	1.95606	1.29157
AC012181.2	1.49931	1.83838	0.489161	1.25238	1.20205	0.997446	1.24277	1.58401	1.57985	0.311517	0.662735	1.45297	1.2644	1.05427	1.46706	0.399133	0.825664	2.15259	0.694204	0.723121	1.96277	0.684423	0.302765	1.87389	1.47086	3.30066	0.603715	0.892135	1.34317	3.11127	3.80663	0.339091	0.66606	2.45141	3.13736	0.663119	0.80795	0.340644	3.19781	1.03808	0.36593	1.36819	9.50867	0.625406	1.96273	1.12588	1.08654	2.12428	2.28953
AC012181.1	2.01281	1.44198	0.21029	0.927244	0.983109	0.690848	0.727514	1.59675	1.79982	0.170445	0.419867	0.821883	0.967991	1.31281	1.18154	0.444108	0.770754	1.74798	0.696356	0.595834	1.6454	0.480065	0.683332	1.55464	1.63254	2.37593	0.406232	0.741489	1.60803	3.02747	3.00821	0.323945	0.904228	1.62748	4.25061	1.33035	0.918764	0.556482	1.99726	1.2171	0.346089	1.49987	9.83525	0.661814	2.27564	1.43644	0.73112	2.72178	1.94453
AC012170.2	0.26071	1.04619	0.122433	0.783653	0.68685	0.274618	0.905371	0.689027	0.854113	0.153105	0.094288	1.06803	0.343346	1.08098	0.669314	0.275018	0.552659	0.431021	0.139003	0.217189	1.14956	0.389494	0.238705	1.92545	1.4458	1.86743	0.118256	0.401929	1.50134	0.772196	0.907931	0.101846	0.600153	1.14636	3.04108	2.07704	0.516647	0.58318	1.41351	1.27549	0.131888	0.986246	6.31311	0.736913	0.562711	1.21083	0.361815	2.10174	0.603799
AC011498.6	0.247976	0.266049	0.160123	0.49195	0.656444	2.08964	0.342761	1.35171	1.21013	0.133491	0.0822093	0.946229	0.632742	0.985339	0.634634	0.35968	0.500394	0	0.0908969	0.142025	1.30106	0.0424498	0.579779	0.891049	1.63877	0.949788	0.0927961	0.280352	0.661183	0.702547	0.560731	0.0443995	0.289176	0.658211	1.62451	0.0744229	0.0614267	0.722565	2.02641	0.667258	0.129367	0.564312	4.04403	0.566921	0.525669	0.641989	0.167011	1.47254	0.394837
AC011477.3	3.17739	2.11632	1.58057	2.17898	2.71082	5.12363	1.93223	4.23577	4.2998	0.633504	1.50853	3.59238	2.60886	3.63244	3.4341	2.38093	2.56819	2.81784	2.35813	2.78587	3.58571	2.92777	1.35455	2.15721	2.83163	3.31971	1.99638	2.35047	3.6512	3.80637	2.88018	1.17995	3.24131	3.93348	1.98494	6.40444	1.43812	2.89564	4.9939	3.02584	2.40116	2.0404	7.57	1.43489	3.63664	2.38316	4.29752	2.73316	2.99802
AC011477.2	3.75902	6.35596	1.66695	3.5414	2.71671	2.69394	2.72625	2.95837	3.84023	1.23816	1.84368	5.36446	2.31702	3.81939	3.4052	1.85382	2.32449	1.93534	2.34052	2.16276	3.05794	2.09207	3.30929	3.15356	3.24591	4.25762	1.61008	2.8332	3.37281	3.85385	3.65297	1.84395	2.40195	3.0576	3.90846	4.94537	1.00344	3.26763	4.37034	3.44858	2.79382	3.23645	19.7344	1.8208	3.02731	2.32259	3.14437	4.34888	3.24315
AC011472.1	1.02797	4.19012	0.775006	2.90285	1.51739	0.936482	3.0722	2.13463	1.16809	0.448685	0.405267	2.6655	1.31721	0.883169	5.72752	1.51273	1.22094	0.454731	0.244415	0.731965	3.36888	0.51365	1.43906	2.60431	6.46855	4.33759	0.443595	1.66474	2.96312	1.31843	1.53733	0.557139	0.592437	1.60601	7.33053	0.266824	0.935974	1.90694	2.54917	1.19614	0.463811	3.35994	5.13499	0.558951	2.10453	3.29908	0.723518	5.10344	1.97592
AC011468.1	3.44274	1.924	0.774283	1.17703	1.51404	0.937435	1.53031	3.74473	0.949489	0.529515	2.20504	2.51927	0.678553	0.873953	1.45504	1.50512	1.0292	1.06478	0.995826	1.36817	1.20147	0.898048	2.79682	3.62962	4.7146	2.32371	0.560901	1.13854	1.51382	1.32703	1.44544	1.24121	0.780316	1.46432	1.98925	3.17703	0.626552	1.33451	2.33689	4.20125	1.401	1.46184	10.4396	0.899515	1.50926	1.1318	1.2198	3.00399	1.56619
AC011462.4	0.352082	1.68365	0.327378	1.49009	0.510166	0.296692	0.778655	4.45982	1.21594	0.303254	1.35398	6.03925	0.649153	0.486611	1.64056	0.565678	0.820987	0.576263	0.412984	0.32264	2.33167	0.385735	3.49536	3.96041	7.48141	4.05843	0.316209	0.71649	2.13924	0.623432	3.25948	0.554746	1.36077	1.16299	3.6268	0.380402	0.523289	1.00312	2.78628	6.69487	0.636751	2.93018	7.46433	0.386365	2.90582	2.38208	1.01174	2.5089	0.597972
AC011445.2	0.548272	0.336132	0.660854	0.483419	1.01852	0.385013	0.918592	4.93357	2.19535	0.393529	1.81763	0.929821	0.240685	0.378881	0.58062	1.71284	1.47515	0.33236	0.401943	0.837372	0.426166	0.500564	3.28688	4.33992	1.57938	0.533324	0.273561	0.206618	1.41757	0.323608	1.0696	2.09422	0.852484	0.538998	0.660555	0.109699	0.452711	0.710035	0.838428	1.31137	1.90685	1.18827	0.993474	1.33702	0.826486	0.630856	0.656459	0.434102	0.775981
AC011374.2	1.20217	1.14238	0.962564	0.755227	0.669975	0.949723	0.997004	3.74455	1.17332	2.26504	3.02893	0.480567	0.831187	3.07379	0.954822	2.22656	1.56333	0.655873	0.66099	1.5836	0.560659	0.740853	1.81616	2.66696	2.5056	1.27171	0.869743	1.56299	1.06845	1.17077	1.91885	1.54976	0.440597	2.48185	2.33549	2.85028	0.893373	1.32333	1.55113	5.06786	3.01037	0.898883	2.61401	1.8689	1.08732	2.15786	0.809653	2.09403	0.957068
AC010976.2	0.129882	3.52636	0.172527	1.7914	0.103406	0.117266	1.04452	0.809122	0.44577	0.47944	0.0984195	2.21168	0.256575	0.435951	2.39722	3.24608	0.549141	0.185587	0.299256	0.318806	2.42294	0.241396	1.84204	1.39141	4.52747	3.08633	0.148125	0.587357	1.54713	0.354829	0.0987203	0.611274	0.370925	0.591	3.01785	0.20047	0.478003	0.216261	1.93653	1.33138	0.413003	0.579072	1.81554	0.135742	0.73421	0.742959	0.366561	3.08508	3.17098
AC010973.2	0.449835	0.740674	0.185899	0.798918	0.415439	0.203071	0.594321	2.93577	0.289478	0.456638	0.272694	1.41989	0.296209	1.08356	0.644242	0.791565	0.334274	0.257106	0.244978	0.161943	0.527475	0.255216	1.09103	2.10431	4.14226	1.2377	0.320637	0.290609	1.00521	0.40964	1.05308	0.441829	0.513866	0.59132	1.9046	0.123433	0.229226	0.615845	1.69518	1.06056	0.33972	0.534818	0.244532	0.39961	0.42139	2.0053	0.253911	1.16008	0.477496
AC010883.1	0.873837	1.41237	0.615548	2.67915	0.619811	0.753097	1.07808	5.44371	1.0139	0.812519	2.26489	2.88692	0.496942	0.548966	0.925394	1.06361	2.52921	0.505638	0.990045	0.500477	0.963263	0.407966	6.51495	2.58145	7.22859	4.57848	0.198183	1.5717	2.05393	0.703319	2.32464	0.512044	0.741104	2.10859	3.58907	0.715246	0.550988	0.617267	2.68776	2.35133	0.884116	2.16934	2.3751	0.653811	1.30229	3.40028	0.677695	3.89965	0.337298
AC010834.3	0.639748	0.846355	0.626167	1.06877	1.08837	1.18815	1.16776	1.71303	0.808936	0.290013	0.267902	2.44727	1.35248	1.18668	2.04437	0.556005	1.11732	0.949119	0.740534	0.520682	1.63314	1.32571	0.218005	1.15729	0.787365	1.44932	0.772807	1.21814	1.05556	1.31166	2.41849	0.217032	1.41354	1.4697	1.4604	2.93055	0.73398	0.850303	2.45222	0.87582	0.515264	1.53248	14.0023	0.708199	2.18889	1.46447	2.11654	1.99946	1.71559
AC010776.3	44.1818	0.045716	0	0	0	0	0	0	0	0	0	0	0.024551	0	0	0	0	0.0339023	0	0	0	0	0	0	0	0	0	0	0	8.37122	0.0396744	0	0	0.30789	0.202139	0	0	0	0	0.267533	0	0	0	0	0	0	0	0	0
AC010776.2	38.929	0.0358623	0	0	0.0326001	0	0	0.0607349	0.0439172	0	0	0.0637739	0.0674074	0	0	0.0130532	0	0.0531898	0	0	0.0136405	0	0	0	0	0	0.0145933	0	0.00945263	8.51415	0	0.041894	0.0194898	0.276031	0.0528566	0	0.0144901	0.492405	0.0167724	0.314802	0.0203445	0	0.0397482	0	0.0165335	0.0201921	0.0393966	0	0
AC010761.3	0.0316804	0.660363	0.556419	1.17319	0.776849	0.367074	0.445858	0.394716	0.380557	0.136434	0	2.25654	0.625829	0.218926	1.61038	0.254498	0.426187	0.259261	0.185801	0.108867	1.53659	0.498934	0	0.712715	1.12733	1.52542	0.0948417	0.465615	1.53581	0.336578	0.674226	0.0453782	0.084443	0.822215	0.515273	0.494413	0.313904	0.451302	0.981036	0.511475	0.0440729	0.823931	16.791	0.521477	0.644709	0.831112	0.597424	0.903003	0.739826
AC010761.1	0.334106	1.76802	0.744865	1.30238	1.46999	0.463065	0.954559	2.59258	1.37301	0.302917	0.349778	1.84043	0.706326	0.48607	0.881443	0.769094	0.551973	0.879422	0.567221	0.966843	1.77141	0.349184	0.93612	1.03296	2.98566	2.0013	0.29831	0.437368	4.44422	0.435917	1.12271	0.730443	0.398404	0.746803	1.71605	0.316649	0.278777	0.569318	1.71428	1.48259	1.46779	1.21193	5.92659	0.546742	0.894632	0.971196	0.442142	2.39473	1.5866
AC010719.1	1.12162	0.285434	0.153049	1.11956	0.0943526	0.0668748	0.446753	1.18653	0.444874	0.205062	1.48736	2.03035	0.139352	1.1407	0.373521	0.245565	0.398573	0.365618	0.0310291	0.0484824	0.197394	0.33329	0.852564	1.37539	3.33499	1.23514	0.337892	0.215331	0.506127	0.569585	1.17101	0.121252	0.141021	0.299588	1.60629	0.0508108	0.335503	1.09626	0.631066	0.531484	0.264969	0.632949	2.5309	0	1.07667	1.81166	0.190039	2.41284	0.157248
AC010655.2	0.0477598	11.3901	1.35693	4.95851	2.18258	1.76077	3.12071	3.86786	2.25898	1.46548	0.506667	13.1909	0.739052	0.0990128	1.19701	0.682079	2.48433	4.38619	0.66525	2.13359	2.82879	1.01379	1.68356	4.71566	5.55983	3.69339	2.12085	1.21489	3.75082	0.727287	4.82805	1.64184	0.0636511	2.25369	8.02694	7.45354	1.11208	5.16456	1.47896	2.3989	1.06308	3.41583	2.98568	3.40667	3.45576	3.79181	1.73696	7.26039	4.94292
AC010542.5	3.14515	2.48638	0.940617	1.86091	1.42992	0.871823	3.20329	6.617	1.24279	0.445553	1.15244	2.64689	0.599507	1.48709	2.30813	1.69917	0.927868	0.903113	0.66745	0.426632	2.08442	0.623412	3.03666	2.63785	5.59593	3.01915	0.454264	0.888943	2.00621	1.20175	3.96328	0.711321	0.606685	3.31978	4.03855	1.63945	0.492057	0.803901	5.55321	6.60707	2.30287	2.2602	15.5224	1.51377	3.04118	1.99991	0.668918	2.29362	1.31785
AC010326.3	4.47015	4.1108	1.63566	2.98684	3.39951	2.10907	3.58088	7.88047	2.65689	1.22826	2.43904	5.48268	2.06966	2.96037	3.56686	2.38985	2.42213	2.09585	2.25301	1.2001	3.45289	1.99276	2.67984	5.06318	4.92354	6.14874	1.44046	2.10574	4.03314	3.29804	6.91211	1.70078	2.14098	4.22974	3.91298	2.85087	1.01503	2.65331	6.3819	9.43889	2.23487	3.33031	10.1882	3.0233	4.84328	4.82201	2.09071	5.97258	2.24894
AC010245.2	0.487666	1.42844	0.349883	0.895795	0.754942	0.570756	1.19834	1.94094	0.915317	0.554212	0.646685	0.827038	0.419239	0.879944	1.24328	0.628746	0.522405	0.283303	0.516406	0.729292	0.821291	0.445232	0.955025	2.21791	2.34133	1.32428	0.513679	0.719798	1.07699	0.690807	0.92254	0.601504	0.469393	0.767067	1.3954	1.65873	0.348979	1.10521	1.64686	1.77392	0.772655	1.46207	3.64508	0.76804	1.68467	1.34669	0.535236	2.05929	1.06407
AC010201.2	0.296079	0.622349	0.316818	1.4125	0.24751	0.40098	0.435824	2.08601	0.523966	0.330156	0.448714	1.491	0.793778	0.146146	0.910782	0.840024	1.00525	0.5096	0.124033	0.169575	0.838364	0.333067	1.09542	2.16744	3.236	2.71549	0.274354	0.394509	1.42851	0.718994	1.60905	0.0454389	0.535521	0.885687	2.86645	2.09455	0.324801	0.616234	1.58874	1.49854	0.382476	1.48506	7.87503	0.812271	2.64206	1.85425	0.826117	2.69589	0.639795
AC010201.1	0.204925	0.646119	0.151227	0.851802	0.0326303	0.400877	0.235432	0.54712	0.439578	0.0630375	0.931705	0.851106	0.501204	0.0809216	0.578709	0.365828	0.708891	0.212956	0.171694	0.134135	0.300368	0.240549	1.68483	2.26852	2.94663	1.53775	0.116854	0.297874	1.13536	0.352493	1.09031	0.167731	0.429174	0.310822	2.16913	1.37062	0.116028	0.417036	1.14158	2.15314	0.36654	1.18013	5.33119	0.588968	1.3901	0.768009	0.657219	1.25166	0.341827
AC010186.3	0.598807	1.04337	0.892168	0.775291	1.14518	0.823295	0.766702	1.20419	0.823421	1.11975	1.00303	2.00661	0.855017	0.322331	1.53973	1.00709	1.10234	1.26666	0.637692	0.830319	1.8755	0.975431	0.734593	0.795679	0.935641	1.5819	0.849151	0.954907	1.72749	1.38844	2.06585	0.541716	0.772849	1.44257	1.19607	2.23981	1.20539	1.3224	2.0242	1.4134	1.39426	0.77048	24.6362	1.10672	1.53215	1.26196	1.01885	0.95821	1.37162
AC010168.2	0.911581	0.807054	0.252751	0.870519	0.318127	0.481639	0.453796	1.56637	1.22884	0.172459	0.494346	1.20234	0.644369	1.17939	0.910877	0.613501	0.47538	0.630277	0.149457	0.22018	1.19799	0.572345	0.410654	1.12477	1.1548	2.86841	0.220878	0.378653	0.963847	0.682784	1.00721	0.104291	0.201836	0.917349	1.65267	1.04889	0.375146	0.373396	1.93736	1.52032	0.316029	0.855913	6.96603	0.756383	3.10172	1.78546	0.577984	3.86014	0.392619
AC009974.1	0.138976	0.937228	0.0717913	1.05688	0.348534	0.805143	0.488974	4.61745	1.0434	0.59851	0.55288	0.656567	0.343174	0.0960388	0.66229	1.42656	0.342761	0.189555	0.254711	0.0795963	0.745369	0.666135	1.29973	3.56079	4.62747	2.12919	0.104013	0.314241	1.1678	0.0492169	0.110914	0.0995329	0.324131	0.204938	0.941835	0.500515	0.344259	0	0.836816	0.747915	0.725024	0.858427	2.07756	0.12709	0.157123	0.383782	0.311998	0.605199	0.626967
AC009948.1	0.636133	2.90197	1.11033	2.92637	1.36964	1.09874	2.54203	1.31276	0.711939	1.10603	1.02695	1.2004	1.10835	1.80754	3.08798	1.16735	1.19064	0.481427	0.93271	1.67459	1.9459	1.17148	1.01191	1.60494	1.78762	1.97744	0.784627	2.15756	2.51562	1.37127	2.32085	0.554633	1.85883	1.61276	2.03503	3.26337	1.38982	1.16665	1.81265	2.47366	0.873979	2.07061	8.38736	0.664833	1.28205	1.43481	1.70308	3.35987	1.38405
AC009812.1	1.41814	1.95849	0.508946	2.15199	0.665547	1.11641	1.39558	1.54992	1.38972	0.996457	0.811613	1.34537	0.707737	0.928421	1.88648	0.759489	1.19153	0.583669	1.2038	1.17985	1.42023	1.15504	0.773208	3.26502	2.88364	1.54646	1.07254	1.16449	1.77542	1.00444	1.47728	0.962198	1.21358	0.880516	2.80564	3.3153	0.887467	0.715287	1.26694	1.57993	1.07989	1.92177	1.82583	1.44701	1.60332	2.1436	1.43434	2.6948	1.31519
AC009779.2	32.4825	4.31194	3.87091	6.23034	2.02701	4.97362	3.05058	3.82188	6.00422	2.64207	6.66818	4.02904	3.90271	10.9774	3.0087	4.33192	3.59604	3.87505	3.74265	2.79842	3.8626	4.98851	6.0843	4.47739	4.24368	5.27503	3.87004	4.44644	4.50369	11.5615	6.62152	5.52363	4.61376	3.64457	2.53419	2.97228	3.32164	2.04301	5.94315	5.2865	5.04469	2.83497	4.10918	6.45182	3.12123	6.58005	3.87609	4.82276	4.07014
AC009704.2	0.0981894	0.401316	0.135259	0.432875	0.291848	0.206855	0.921254	1.08744	1.32693	0.140953	0.130207	0.523351	0.387936	0.723771	0.207965	0.233715	0.146768	0.505937	0.0959781	0.149964	0.793745	0.49305	0.565098	1.22721	1.06485	2.43557	0.228628	0.148012	1.41744	0.255	1.32346	0.187526	0.959643	0.695006	4.85022	1.02158	0.0972907	0.678184	0.975996	0.763271	0.136599	0.638418	38.7866	0.299306	2.0352	0.271151	0.382085	1.39937	0.625363
AC009570.1	4.22267	0.988693	0.723454	0.449028	0.118257	0.290569	0.106655	0.440634	0.382345	0.319841	0.45022	0.6786	0.405207	0.733182	0.404486	0.416686	0.361582	0.289421	1.33783	0.170144	0.851073	0.377774	1.16016	0.742584	0.517772	0.990766	0.359974	0.335858	1.26186	1.45784	0.745133	1.55011	0.480758	0.725947	0.805301	0.56042	0.357429	0.164881	1.02215	0.799366	0.97416	0.662241	0.634423	0.62095	0.263893	1.02546	0.705032	0.470423	0.47301
AC009549.1	3.3661	1.35662	0.852469	0.731651	0.940588	0.780245	0.537262	0.545173	0.802504	0.868168	0.671424	3.54375	0.747073	0.0777538	0.920138	0.6528	0.925006	3.85368	1.53975	0.902186	0.28861	0.75118	1.45699	0.445318	1.20115	1.43651	1.91812	1.11305	1.0485	1.44111	1.84582	0.738674	1.02469	0.940209	0.779462	0.799186	1.7652	2.36784	0.655985	6.67752	1.99575	0.499905	1.14683	8.3515	8.90458	0.724998	0.555712	0.579061	0.806185
AC009318.3	0.691425	1.27169	0.909167	0.581928	1.05092	0.496575	1.42172	1.17473	0.613487	0.304535	1.2503	0.685284	0.600157	0.781867	1.17599	1.12211	0.73285	0.542975	0.50689	0.756007	0.967388	1.42034	1.13048	0.510645	0.702973	0.779576	0.784062	0.959356	0.711014	0.779104	1.4715	0.720278	0.795829	1.63135	1.24954	2.71651	0.685097	0.854724	1.29765	0.845679	0.874449	0.694772	4.35657	1.55199	1.1015	1.25845	0.733785	1.04513	1.13427
AC009309.1	1.16845	0.758488	0.532582	0.772682	0.268136	0.687792	0.518206	1.42727	1.03205	0.888007	1.36718	0.599474	0.475222	2.46987	0.703616	0.582826	0.339035	0.96872	1.36049	0.629849	0.576991	0.658894	1.8295	1.24562	0.279522	0.451297	0.617296	0.893622	1.15511	0.973638	0.65825	0.44303	0.961824	0.81084	0.621065	0.165025	0.408621	0.623081	0.630644	1.04803	1.29086	1.07254	1.1209	1.00567	0.271977	0.332159	0.339468	1.25166	0.474234
AC009283.1	0.882335	4.50781	2.20299	4.31123	1.83033	2.58168	2.56237	8.75392	3.42258	0.923573	3.28263	4.34658	1.30726	5.82635	7.28481	4.79101	3.42905	2.49605	2.2999	0.954539	3.08623	2.93693	5.36011	4.65616	5.83096	7.58147	0.635905	3.65762	3.56452	1.54499	4.27721	1.01809	1.73121	5.46469	9.83305	2.9423	1.62709	2.72969	7.2524	9.58472	1.43206	4.84446	9.72604	3.31715	3.90707	4.90698	2.48704	5.04546	2.99189
AC009159.3	3.20496	2.86896	1.52356	5.53902	0.920466	1.80188	1.50219	6.65527	2.42096	1.79939	2.97242	10.0322	3.6123	3.04362	3.37323	2.38685	2.89199	2.19909	3.546	0.60811	5.26357	1.83104	7.35541	12.5085	20.2306	7.68876	1.98173	1.68943	5.8717	1.2116	7.46944	2.25311	3.61624	3.08503	12.0814	3.11577	2.29892	3.0047	6.47214	3.77407	5.00573	4.93472	5.23736	1.79807	3.11217	8.74191	2.03051	2.89564	1.3149
AC009159.2	1.64346	0.223903	0.18866	0.24151	0.0872294	0.549565	0.629372	0.704214	1.09677	0.393204	0.103779	4.01958	0.257664	0.180271	0.755104	0.279416	0.374332	0.308365	0.114746	0.0896444	1.09495	0.303663	0.2252	2.38009	4.164	1.86509	0.494606	0.147462	0.99485	0.258673	0.888287	0.411025	0.139066	0.923234	1.55574	3.28824	0.36187	0.540533	1.37628	0.280777	0.435493	0.678451	4.82147	0.906513	1.79907	1.72892	0.304533	1.15665	0.166144
AC009133.1	0.861072	1.51652	1.25355	3.38025	1.49199	2.54374	1.01118	5.67304	1.48688	1.25154	1.78025	2.59441	1.45874	1.26041	1.82928	2.78437	2.745	2.08198	2.11759	0.676983	2.75266	1.68039	3.13105	3.99172	7.87111	3.8834	1.26546	1.88946	2.71206	1.8435	3.49017	1.70431	0.933713	3.03819	3.25371	0.779976	1.52799	1.77406	7.93204	3.69313	2.15622	2.78403	3.36168	2.04732	4.71267	4.56116	1.83117	3.4956	1.07605
AC009120.3	1.04774	1.2469	0.859607	1.10041	0.618258	0.779032	1.14618	2.17568	1.01797	0.199066	0.653828	2.19496	1.07546	0.809216	3.1111	0.330071	1.16076	0.924679	0.542192	0.105896	2.09826	0.654124	0.0886752	1.73316	1.56652	2.20321	0.307511	0.73162	2.21097	2.90288	3.11517	0.0441398	0.657108	2.1085	2.67312	0.332945	0.610675	0.558709	3.21622	2.7087	0.514442	1.28231	12.1449	0.619967	3.06589	1.9998	0.857843	4.2942	0.621503
AC009120.2	1.71654	2.38694	0.658849	1.53464	0.577191	0.737387	1.55205	4.44069	1.08715	0.412985	0.356066	2.2722	1.04191	1.39827	2.37298	1.24542	0.98905	0.684503	0.548359	0.318554	2.11095	0.653356	1.06241	4.5365	4.75789	3.82689	0.468906	0.672182	2.58789	1.95613	3.23479	0.343399	0.645411	2.62459	3.50072	1.12244	0.636624	0.782395	3.50302	4.31785	0.486941	1.87676	7.42846	1.05234	2.84598	3.86634	0.766416	4.58601	1.07392
AC009118.3	0.543247	1.57644	0.467713	1.48487	0.403673	0.896489	1.11041	2.82021	0.625379	0.877326	0.768416	1.21085	0.63197	0.750819	1.20174	0.872815	0.779537	0.428108	0.955823	1.07861	0.81074	0.719166	1.40692	2.28587	3.1114	1.92879	0.451757	0.982677	1.4748	0.859322	1.84983	0.700322	0.62747	1.32447	1.76715	0.65216	0.50239	0.469019	1.68226	1.46178	2.01534	1.05964	3.59295	0.695501	1.14648	1.15014	0.569138	2.35135	0.826535
AC009113.1	0.892989	3.36416	0.768826	2.88414	0.533731	1.73811	1.5677	2.99651	1.58378	1.74869	1.0383	3.09471	1.6831	1.40412	1.92333	1.95225	1.97317	1.73577	1.34727	1.81601	2.3298	1.98061	1.69448	4.4401	2.62502	2.89863	0.95569	1.22905	1.9324	1.27872	2.94711	0.778581	0.974516	2.06112	2.49087	0.924423	0.839934	0.62851	3.1245	3.34312	2.10652	2.57489	2.14575	1.34919	2.50936	3.40414	2.09191	2.95111	2.15682
AC009084.1	0.0498691	0.79491	1.08197	6.7934	0.111169	1.68094	0.952496	2.07112	1.79714	0.536913	0.264522	3.40711	2.88974	0.964933	0.88019	1.11282	2.1468	2.35797	1.09678	0	4.18637	1.16101	0.287006	7.2924	0.304212	4.29309	0.547409	3.21366	3.51354	1.27157	1.06132	1.1429	0.0664622	0.117661	4.77652	0.59867	1.1859	2.45414	1.2583	0.357835	1.52629	3.43699	3.79526	2.189	0.0563809	2.06571	2.05998	3.0798	2.59384
AC009065.8	3.3904	0.787151	0.518164	0.822517	0.626104	0.633952	0.746181	3.79096	0.933825	1.03676	1.01092	1.19565	0.581248	8.09627	0.906462	1.19975	1.09752	0.656706	0.970682	0.505558	2.05836	0.673109	1.47209	3.56046	5.09915	1.55141	0.480467	0.793827	1.91917	2.41556	1.47299	0.373564	1.52399	2.627	2.21156	0.264919	0.437314	0.545592	2.71505	2.3752	0.418637	0.913068	2.01752	0.697141	0.907247	2.3545	0.378318	2.44614	1.25642
AC009041.2	3.89848	0.928228	0.133839	1.25287	0.148904	0.0682277	0.691825	0.277413	0.036472	0.108964	0.0644201	0.22362	0.0906344	14.7878	1.10894	0.234874	0.286824	0.0699402	0.130584	0.635293	0.173697	0.105336	0.332004	0.293461	0.81906	0.395759	0.133313	0.494295	0.138686	3.21425	0.25416	0.191355	1.85058	0.477576	0.226796	0.00485989	0.0641795	0.120582	0.334298	0.290483	0.168956	0.452729	0.418124	0.0518287	0.0274613	0.245945	0.269014	0.448739	0.21486
AC009032.1	0.25675	0.584656	0.075789	0.0970202	0	0	0.258101	0	0	0.0394899	0.0486389	0	0.0966091	0.30416	0.155371	0.098217	0	0.100055	0.268894	0.0840286	0.136848	0.0251153	0.0527731	0.412581	0.149165	0.160554	0.183009	0.0414674	0.331917	0.441639	0.23418	0	0.195531	0.216349	0.463998	0.132096	0.0363429	0.142501	0.294471	0.197391	0.306159	0.190785	21.8328	0.268334	0.165873	0	0.0329372	0.34849	0.0389341
AC008982.2	0.769582	0.235906	0.29816	1.44192	1.07223	0.472871	0.547987	0.865626	0.722228	0.0690472	0.127566	1.63143	0.591216	0.132954	0.747072	0.286217	0.316341	0.291573	0.235078	0.220383	2.75167	0.219568	0	0.240463	1.33666	1.26326	0.0639973	0.471281	2.69448	1.72608	0.511824	0.0459305	0.256412	0.340454	0.985138	0.115484	0.381269	0.24916	1.4343	0.287611	0.0446093	0.583771	5.75228	0.117294	0.507543	0.398476	0.40313	1.01555	1.42958
AC008969.1	0.823978	1.50666	0.460961	1.38006	0.459208	0.409331	0.802992	0.840574	0.105355	0.296356	0.107358	1.23699	0.656303	0.43265	0.985637	0.539562	0.596995	0.292824	0.548671	0.465739	1.32737	0.581456	0.406395	1.158	1.27673	1.11564	0.330336	0.54917	1.23033	0.851199	0.878715	0.239657	0.577844	0.889276	2.33117	0.615533	0.210348	0.468306	1.51865	0.506689	0.15017	0.879647	3.2518	0.0723894	1.00683	0.802358	0.528288	2.03981	0.572912
AC008915.2	0.769232	0.461972	1.10289	1.8271	1.10237	0.694515	1.05734	2.05374	1.93292	1.16623	2.4773	1.87125	0.847656	3.62339	0.764743	1.21908	0.901073	2.26967	1.86442	1.09692	1.11286	1.01045	3.00408	1.76586	1.27686	1.5347	1.15926	1.33112	0.892959	0.88952	1.36981	1.01188	1.17164	1.4075	1.04971	0.358073	1.95992	1.21982	1.06229	1.40807	1.20117	1.81686	1.7921	1.03363	1.15365	1.43061	0.845835	0.994369	1.11648
AC008906.1	0.521159	0.774569	0.571067	0.647496	0.616096	0.582231	0.762037	0.623094	0.711406	0.27205	0.879582	1.0101	0.395171	0.327405	0.802775	0.225543	0.297437	0.531327	0.463111	0.235171	1.62037	0.821855	0.204502	1.06587	0.834936	1.72824	0.661902	0.303528	0.877895	0.425055	1.983	0.475043	0.399902	1.19236	0.913295	2.38882	0.782408	1.08397	1.2679	0.849904	0.395468	1.10897	11.7614	0.577682	2.07117	1.59183	0.467997	2.97598	0.92201
AC008870.2	0.339636	0.586808	0.239246	0.796295	0.98082	0.195138	0.543171	1.4426	0.347713	0.0498637	0.245664	1.12206	0.335467	0.725449	0.741147	0.192917	0.373829	0.154414	0.135813	0.106103	1.05118	0.243133	0.577515	1.09981	1.83641	0.968603	0.077028	0.174536	1.34714	0.404573	1.64277	0.0884521	0.34977	0.582791	1.08808	0.277996	0.260044	0.439843	1.31025	1.30161	0.150339	0.682559	3.39882	0.592942	0.750516	0.852642	0.235674	1.19788	0.245809
AC008770.3	0.675577	1.49104	0.24429	0.893498	0.753006	0.711616	0.67913	0.982011	0.659367	0.145471	0.0447935	1.66948	1.00093	0.466855	1.16855	0.693465	0.393828	0.552867	0.198109	0.270849	1.35481	0.647631	0.0486008	0.591052	0.755545	1.08431	0.539328	0.343701	0.93886	1.22017	1.79722	0.193536	0.540219	1.15562	1.03776	0.324408	0.167348	0.43745	1.89833	0.60595	0.469923	0.878507	10.5583	0.0617799	0.840172	0.932804	0.66733	0.748857	0.860543
AC008764.2	6.47476	3.14468	1.7375	3.50318	2.71803	2.61292	2.11325	2.96842	3.78786	0.497929	0.669044	9.04526	2.63009	2.61489	6.73804	1.38853	1.54599	2.17912	2.89734	1.34848	3.29417	2.73496	0.48394	3.15288	3.54792	4.66233	1.46845	3.18472	4.78303	6.55134	4.83183	2.22824	2.5215	4.01754	3.34318	1.41324	1.41641	3.32137	6.55802	2.33806	3.39244	3.71777	8.79925	1.9993	3.46998	5.3408	5.70102	3.46204	4.59681
AC008760.1	0.345667	1.10198	0.761867	0.944816	0.796255	0.509749	0.787632	2.87119	1.4187	0.0744321	0.305588	1.60792	0.470406	0.127398	0.618237	0.575939	0.847363	0.649579	0.135153	0.158381	1.01025	0.457604	0.696281	2.62096	3.77212	2.58907	0.252957	0.468956	2.2939	0.440692	0.980871	0.3961	0.0614243	0.67964	2.66533	0.663948	0.319669	0.41781	1.98225	0.950793	0.480883	0.928964	2.56804	0.421472	0.755554	1.5273	0.351794	4.85338	0.635999
AC008735.2	1.12717	3.76615	1.07719	4.17412	2.76398	1.06857	2.91772	5.85155	2.4118	0.121356	0.112103	5.07933	2.22666	1.36312	5.25215	2.38948	1.66798	1.25553	0.413168	0.451897	5.04653	1.40856	0.770336	4.05022	8.39438	4.60503	0.703001	1.72034	5.59183	2.81418	7.34648	0.484358	1.7651	4.2551	10.185	0.372115	1.17269	2.26258	8.92007	5.56048	0.509628	3.55443	1.91478	0.927689	6.1806	5.097	1.18932	7.89819	1.61524
AC008669.1	1.42988	2.19823	1.43228	1.59353	0.922277	2.45419	0.525343	1.40171	1.73288	2.21934	2.63726	1.68814	0.998904	1.39439	2.33157	1.51601	1.16521	1.39918	1.02165	1.92888	1.15092	3.1659	1.15919	2.27698	0.944574	2.61587	1.37618	1.5345	2.52877	1.85072	0.726016	1.23719	1.36394	0.95901	2.79394	7.59811	0.848636	0.977575	1.16545	0.924449	1.6257	1.30251	5.22794	2.34968	2.97059	1.834	3.10251	2.41367	2.27285
AC008610.1	0.884954	0.641187	0.415586	3.08564	0.672532	0.381339	0.930045	2.58942	1.208	0.779548	2.08033	2.74823	0.741653	0.500355	1.16436	1.47209	2.34493	0.73153	0.53081	0.414691	0.450239	0.523331	4.80369	2.81539	5.31661	2.17163	0.762675	0.955016	1.58604	1.56699	0.941686	0.403323	0.536095	2.23033	3.92551	0.434607	0.916711	2.3442	4.05987	5.33976	0.951325	1.67386	1.85866	1.17712	3.22892	1.38853	0.866927	5.15952	0.640481
AC008555.1	0.0172019	1.25849	0.793819	1.33471	0.33873	0.936174	0.242092	0.928735	0.043049	0.784025	0.43341	2.12545	1.73305	0.142647	1.28327	0.404327	0.714805	1.39731	1.13497	1.16912	2.42814	1.93957	0.569248	1.03198	0.991051	0.276092	0.783903	0.991833	2.2349	0.95033	0.256265	0.887023	0.573137	0.304396	0.673553	1.01876	1.02835	1.23267	0.427463	0.0411439	2.03412	0.782913	2.41567	0.136333	0.220411	0.316687	2.46124	0.572033	2.07551
AC008537.2	0.262382	1.28688	0.881008	1.95198	0.767691	0.829136	0.890196	1.0897	1.23118	0.529672	0.130477	1.47796	0.712692	1.40522	1.48193	0.380574	0.529462	0.566632	1.39457	0.413257	1.56019	1.54959	0.56627	0.573885	1.13375	1.05282	0.621849	1.11239	2.31078	1.20796	1.64031	0.798638	0.874213	0.541682	1.54107	1.73242	0.90993	0.297321	1.31657	0.58835	1.59696	0.89564	6.32928	1.13972	1.11241	1.08685	0.97192	1.03872	0.626661
AC008124.1	3.45415	2.22523	1.24382	2.66022	0.794998	1.60015	1.19065	1.9332	1.29054	1.0408	1.51677	1.62489	1.74064	1.125	2.35719	1.37915	1.51978	0.982434	1.19824	1.44791	1.94432	1.96691	0.993495	2.16262	2.64627	2.35878	1.43324	1.45661	2.39337	2.50404	1.52141	1.25902	1.4356	1.9301	2.47813	2.97443	1.13333	0.919482	2.22491	1.95565	1.76753	1.99444	4.52199	1.60165	2.57346	2.51926	2.03382	3.78972	1.15032
AC008115.3	0.547106	1.05921	0.565242	0.875921	1.12334	0.697617	1.07102	0.777329	0.77827	0.186012	0.229108	2.09288	0.70156	0.437773	1.36207	0.385533	1.00717	0.99496	0.211099	0.428791	0.752039	0.670382	0.165721	1.11566	1.22959	2.01672	0.316081	0.423209	1.86126	0.999353	1.83846	0.0824908	0.537266	1.66451	3.5386	2.00495	0.599162	1.19331	2.11363	1.29137	0.721062	1.38545	9.47013	0.473983	2.60441	1.23253	0.982596	2.27989	1.52829
AC008105.3	0.0765133	0.755746	0.254715	0.79831	0.488006	0.116415	0.705061	3.82204	0.6638	0.155602	0.394578	1.57566	0.11756	0.311371	0.714244	0.626038	0.25161	0.197124	0.14958	0.0632982	0.911919	0.296886	0.825652	1.30162	1.03721	2.01574	0.0763528	0.273926	0.579742	0.0963428	1.71431	0.103507	0.209609	2.55745	2.22775	0.112265	0.395912	0.390847	5.10925	3.74402	0.0768758	0.823609	4.33259	0.466464	0.687229	1.2384	0.0534399	1.4472	0.329385
AC007996.1	2.4657	0.900124	0.636859	0.496571	0.437229	0.578475	0.884434	0.896028	0.833033	0.506803	0.609357	0.749432	0.309964	1.11529	0.545974	0.600235	0.572943	0.494269	1.30642	1.93856	0.784048	0.460462	0.798218	0.707395	0.507073	0.605071	0.978619	0.475162	0.510733	1.43285	0.387602	0.377262	1.95674	0.879249	0.334199	1.20419	0.544152	1.03053	0.893375	1.88989	0.678248	0.517388	4.23433	1.54763	0.386472	0.417828	0.840383	0.692163	0.577
AC007991.2	0.30997	1.14021	0	0.819916	0.690994	1.30602	0.623201	0.965506	0.465436	0.83432	0	1.80234	0.612331	0.214204	0.218839	0.138338	0.277997	0	0	0	7.08354	1.48574	0	0.968531	1.57574	1.1307	0.463981	1.7522	2.30412	0.439092	3.62826	0	0.413108	5.11942	9.523	3.9072	0.4607	1.40499	5.33265	5.8385	0.215612	1.0077	15.5863	0	4.38058	0	0.139176	1.47254	0
AC007878.1	0.0978854	0.228042	0.293278	0.647302	0.458238	0.299011	0.600241	0.325223	0.0881878	0.0421551	0.0519216	0.811054	0.309388	0.148816	0.684161	0.174743	0.166798	0.231417	0.258338	0.392437	0.894764	0.214483	0.0281674	0.293618	0.318465	0.642713	0.136752	0.276663	1.38564	0.263455	0.677044	0.0140209	0.143501	0.438808	0.530693	0.317277	0.174581	0.240855	0.808317	0.228272	0.0544703	0.356407	28.2284	0.125319	0.60867	0.256796	0.404342	0.899026	0.633818
AC007743.1	0.349124	2.4745	0.576235	2.35938	0.944371	2.09437	0.4708	0.300599	0.920593	0.930538	0.203254	1.67723	1.31207	0.0882662	3.0179	0.676453	0.851509	0.770411	0.255946	0.829084	2.73224	1.38188	0.196026	0.798197	1.03456	0.639867	0.773259	2.23827	1.45858	1.92997	0.149508	0.603751	0.470963	0.24109	1.80047	2.13137	0.299523	0.964912	0.527376	0.297867	0.349462	1.21803	2.67319	0.521726	2.28163	0.864169	1.57902	1.07873	1.3513
AC007637.1	4.01293	0.596418	0.502539	1.7002	0.503438	1.409	0.36673	0.46896	0.652122	0.187034	0.27644	1.11111	1.1096	1.60865	1.16514	0.263603	0.498561	0.726626	0.331124	0.318385	1.60416	0.999202	0.174963	0.390818	0.459215	0.937859	0.606744	0.844522	0.696191	2.36241	0.517598	0.472781	1.15761	0.819751	0.596495	0.375386	0.481963	1.01239	1.7334	0.405121	0.241675	1.08433	11.6155	1.04849	2.94606	0.527701	2.66759	0.825272	1.10641
AC007566.1	0.112757	3.70528	0.605771	2.44571	1.23167	0.76014	1.54156	4.4956	4.36819	0.461316	0.568194	6.26127	1.44042	0.623362	2.35635	1.24801	1.23373	1.14832	0.628239	0.54247	2.88176	1.15813	1.00585	7.24367	5.66321	3.91567	0.652617	1.32577	3.83368	0.974332	3.47957	0.129208	0.751374	3.59152	5.42037	4.00674	0.804418	1.37263	4.94012	3.60043	0.376475	2.3167	13.9753	1.64981	6.01708	4.42157	1.01255	6.67791	1.26872
AC007406.5	2.03466	3.65659	2.86978	3.95732	3.26282	4.20235	3.09812	2.87885	2.4486	2.43221	4.33816	3.83481	3.57605	2.23313	5.172	2.92893	3.36779	2.18566	3.08562	3.67876	3.57702	3.74254	2.01621	3.80202	3.33619	3.74736	2.43348	4.21722	4.18724	4.05135	3.87913	1.42148	3.40951	4.64174	3.75813	10.4109	2.31745	3.00309	4.38118	2.91636	4.66211	4.15681	8.98663	3.1558	4.28495	5.48101	4.29908	3.78262	4.03369
AC007406.3	0.400553	4.42024	2.41401	9.4827	6.04211	2.20805	13.2744	2.49531	1.12271	1.52376	0.867572	2.71721	6.90165	0.627416	7.70134	5.07693	3.92764	1.66327	3.62167	2.49293	6.47599	3.59299	1.57526	2.70338	1.2896	3.46773	4.22363	13.8723	5.78231	3.75434	3.77925	2.79222	0.533831	1.3546	3.01615	1.49066	0.965758	3.14698	1.63853	1.05386	1.57885	12.7614	5.08065	1.26983	2.05295	2.43349	0.899235	2.05086	3.92586
AC007383.2	0.718568	2.58698	1.81648	4.22606	2.06196	2.38343	2.0902	2.9208	1.49219	1.31684	2.00713	2.04463	1.63091	3.8246	1.98606	2.53826	2.63263	1.82115	2.82448	2.85458	2.01073	1.85297	2.55168	4.85352	6.63729	4.43925	1.52566	2.17788	2.9548	2.0033	2.65181	1.44534	1.36518	3.31864	4.1997	4.8087	1.57547	1.84135	3.05106	4.03162	3.67958	2.86288	3.4075	2.37679	2.40263	2.25876	2.74583	2.66311	1.50928
AC007292.1	0.720495	0.649584	0.525443	2.2141	0.259817	1.02679	0.447352	2.33223	0.668206	0.501934	0.505818	2.06387	0.572111	0.761487	0.927574	0.907915	0.570154	0.32757	0.807837	0.315558	1.58127	0.47884	2.0428	1.35075	2.56385	3.52487	0.169173	0.766646	1.17798	0.645394	0.586287	0.60707	0.42363	1.49995	3.33177	0.254395	0.167976	0.603752	3.66995	2.12878	0.265324	1.24004	1.67033	1.00769	1.22186	1.34594	1.06565	2.24829	1.01223
AC007038.2	0.29908	1.70261	0.595917	1.24317	0.761961	0.787586	1.63211	2.30678	1.31517	0.506004	0.424933	1.83218	0.57675	1.53532	1.3574	0.839004	0.938802	0.407927	0.250581	0.415998	1.51439	0.731398	1.07579	1.5219	3.1059	3.89633	0.405042	0.483039	2.66504	0.635496	2.27324	0.397795	0.683303	1.73892	3.74485	3.10313	0.762023	1.07896	2.67065	3.21907	0.53495	0.888954	13.2387	0.781432	2.36693	1.26836	0.460408	3.55201	0.634941
AC007038.1	0.0718895	0.731622	0.259954	0.827187	0.176284	0.325615	0.361338	0.716556	0.636879	0.0851394	0.142997	1.25402	0.411841	0.317946	0.654727	0.218171	0.451318	0.398748	0.200271	0.181164	1.01923	0.398727	0.279272	0.628951	1.14751	1.3951	0.215216	0.308846	1.14311	0.412435	0.917977	0.0514864	0.277848	1.04314	1.66295	1.07015	0.299172	0.33516	1.30273	0.541635	0.190021	0.532857	11.6652	0.341854	1.25979	0.674979	0.303414	1.77589	0.198406
AC006942.1	4.31694	0.48459	0.408313	2.33203	0.271082	0.864613	0.458413	4.48218	1.27816	1.04739	1.49162	2.25379	0.560518	1.13446	0.751208	1.95376	0.545301	0.552867	0.980637	0.487528	0.765623	0.291434	3.01811	3.11569	3.12178	1.15331	0.576407	0.824882	0.491264	0.861295	0.905797	1.48055	1.09394	0.573825	1.20869	0.0729917	0.572331	0.787411	1.42956	1.63606	0.888154	1.26505	0.908933	0.500417	0.618672	0.671619	0.627897	1.34794	0.677678
AC006547.1	7.11278	1.50486	0.554744	1.27273	0.808344	0.947545	1.10758	1.95486	0.879544	0.382897	0.749022	1.47996	0.638261	2.69858	1.37849	0.865179	0.581622	0.703827	0.460098	0.447313	1.37892	1.0457	0.913018	1.15045	1.106	1.59744	0.744579	0.9697	1.48294	3.93643	1.98123	0.719166	1.46838	1.71932	1.62567	0.410196	0.559668	1.00241	2.5593	2.21414	0.805191	0.870524	3.9613	0.854508	1.63196	1.47315	0.688818	1.49073	1.4138
AC006435.2	0.947997	0.879644	0.277944	0.728556	0.399813	0.283378	0.888592	2.04838	0.788676	0.0689633	0.0509644	1.78774	0.303684	0.336408	1.17577	0.377348	0.494041	0.232975	0.131484	0.132069	1.37416	0.359653	0.258049	1.44102	3.54272	2.01877	0.191759	0.30415	1.13444	0.907361	1.13146	0.110099	0.35854	1.08813	3.21806	0.0153791	0.203096	0.597258	3.02673	2.13722	0.0356441	0.866262	3.58645	0.398315	0.695213	1.13207	0.241584	2.7995	0.883905
AC006064.3	0.265132	0.487637	0.410881	1.66562	0.14776	0.593461	0.466421	1.30758	1.79149	0.285453	0.0878967	3.75771	1.81132	0.137414	1.1465	0.354982	0.71335	0.964331	0.534519	0.455551	0.896467	1.13466	0.429154	1.28407	3.06624	2.51456	0.231504	0.599495	0.814036	0.422522	1.34011	0.189885	0.0441688	1.4075	1.49733	0.198929	0.755278	1.37343	2.05257	2.08081	0.276634	1.55148	4.05356	0.666757	2.02333	2.10497	1.27972	3.09635	1.26646
AC005899.6	0	1.82741	0.494925	1.05595	0.771261	0.1682	1.12365	2.21059	1.43862	0.744989	0.847005	0.851106	0.665936	0.514956	0.826727	1.61535	0.620578	0.338794	0.390214	0.914554	1.43978	0.400914	1.99116	2.86059	4.49164	3.18423	0.265578	0.361059	1.44501	0.339298	1.64255	0.0762415	0.354689	1.44422	2.50099	0.447289	0.474661	0.413589	1.34304	2.29159	0.222145	1.52275	19.3861	0.584101	1.38409	0.808431	0.477977	1.77003	0.960505
AC005856.1	0.0552745	1.21995	0.17132	0.804148	0.492877	0.174669	2.00035	0.229561	0.165995	0.238044	0.293194	0.482095	0.363973	0.152789	0.546333	0.542712	0.644446	0.150782	0.243133	0.506522	0.618685	0.151394	0.159057	0.207252	0.449581	0.64521	0.220634	1.56228	0.250098	0.313198	0.529362	0.554217	0.147332	0.26083	0.399566	0.199068	0.0547685	0.572662	0.507161	0.396622	0.384482	0.646901	7.21137	0	0.249969	0.228961	1.04236	0.875288	0.880101
AC005840.4	1.79462	1.19732	0.436261	0.593378	0.294163	0.778382	0.822439	2.63056	0.277397	0.369385	1.74986	1.38109	0.399702	0.875412	0.801193	1.01294	1.3018	0.359964	1.00609	0.483691	1.08313	1.13849	1.25307	2.30895	2.89788	2.426	0.447714	0.83544	1.19412	1.73841	1.54459	0.415828	0.773802	2.33506	1.66931	0.855429	0.418399	0.615206	3.3901	3.7401	0.514012	0.892293	3.29969	1.20672	0.984643	2.84233	0.331791	1.67167	0.896459
AC005840.2	0.113983	0.881561	0.217405	0.892904	0.654777	0.471016	0.687492	3.22264	1.60618	0.0849591	0.383689	1.10884	0.317543	0.12118	0.724246	0.673047	0.495398	0.430519	0.308535	0.0401734	0.727862	1.05665	0.529838	0.942424	2.51384	1.17698	0.209988	0.198252	1.79089	0.198724	0.634438	0.263737	0.0817968	0.817136	2.61447	0.315771	0.304067	0.465546	0.724034	1.74586	0.597686	0.604284	2.35929	0.657478	1.36797	1.01693	0.212585	3.80427	0.372281
AC005785.1	0.248171	0.568017	0.247851	0.393869	0.414922	0.174273	0.94801	1.23682	0.372641	0.231566	0.351035	0.889853	0.212441	0.0914655	0.39714	0.738384	0.289343	0.45132	0.242582	0.236894	0.401234	0.147275	1.23783	1.51985	2.91845	1.5812	0.189865	0.289925	0.791369	0.603492	0.730623	0.236983	0.275622	0.64409	1.67437	0.188686	0.590159	1.07131	1.10057	1.58784	0.264691	0.602405	2.18099	0.559801	0.61727	0.719592	0.178285	1.24446	0.518082
AC005696.1	3.60419	0.787595	1.06917	1.2271	0.357975	2.06738	0.681583	1.55614	2.57198	0.883664	1.84553	3.37176	2.16182	3.55105	1.46123	0.891861	1.72822	2.53096	2.09289	1.14453	1.93054	0.733049	2.10508	2.40843	2.1043	3.43651	0.569764	1.81549	1.26864	3.18465	0.645537	0.511145	1.47432	2.73636	2.70857	0.642591	1.06075	1.15534	3.11051	3.26474	1.39004	2.59864	1.45489	2.48012	1.65414	2.61143	2.40337	4.52067	1.55306
AC005674.2	0.693592	2.51821	0.153554	1.71552	0.416663	0.422225	0.914562	2.53452	0.446341	0.160018	0.220981	0.877294	0.263948	0.0746969	1.5358	0.410049	0.33122	0.135145	0.250938	0.26311	1.87783	0.678471	0.648011	0.956942	1.83163	1.30117	0.143821	0.458268	1.12954	0.405128	1.2269	0.21289	0.19808	0.945749	1.1802	0.373069	0.27222	0.355793	1.45151	1.32501	0.14411	0.995641	3.74591	0.197696	0.483736	0.970117	0.392309	2.04688	0.956159
AC005674.1	0	0.50676	0.106749	0.227754	0.191943	0.399063	0.276978	0.71519	0.930872	0.148324	0.137016	0.40052	0.362863	0.0952019	0.316101	0.276677	0.277997	0.0939513	0.151495	0.394513	0.353374	0.400914	0.445984	0.344367	0.0700327	0.30152	0.240582	0.194689	0.311669	0.219546	0.80628	0.739991	0.0459009	0.731346	0.497935	0.413461	0.375385	0.669042	0.197506	1.72993	0.191655	0.313506	9.45478	0.440939	1.28497	0.237774	0.216496	0.490848	0.182795
AC005519.1	0.196594	0.708983	0.334536	0.948272	0.360914	0.316713	0.767263	0.672394	0.399383	0.0498029	0.0153353	1.36164	0.403592	0.719237	1.27365	0.557401	0.726004	0.220823	0.220427	0.0794799	1.72586	0.182127	0.116471	0.8094	2.15162	2.10921	0.0577006	0.549117	1.11377	0.384968	1.30441	0.0496936	0.539428	1.0914	2.77957	0.444251	0.206253	0.374409	2.01603	0.352665	0.0965284	1.08274	3.86616	0.31726	1.00673	0.702572	0.301157	2.43557	0.613774
AC005332.6	5.90992	15.5281	12.6366	12.2971	12.0465	16.0931	12.5784	13.0702	18.2438	9.56763	9.28675	15.0183	13.4495	11.4667	14.9091	13.4632	11.8238	15.4916	14.9023	15.4363	16.2699	14.6343	13.9851	11.1676	8.77633	14.8458	9.13792	15.9267	17.6905	11.377	11.1954	12.7134	13.9207	13.1777	13.3505	19.8744	11.7974	11.7958	13.277	8.87354	17.4147	11.0421	21.859	12.0562	11.65	11.8965	12.9907	13.575	18.0674
AC005332.5	0.456626	0.878817	1.02116	3.67703	1.15966	1.40034	1.98137	4.35696	1.00677	1.54332	1.66327	3.03317	1.05048	2.22083	1.61597	3.06459	1.7003	1.15627	2.05939	0.933547	1.83306	0.914261	2.38679	3.95883	4.8717	2.71566	1.03246	1.27427	1.78587	0.839251	1.38389	1.86283	1.1632	1.43876	2.59053	0.617561	1.13398	2.02855	2.93676	4.41707	1.65647	2.23986	4.4146	1.31086	1.53568	1.7079	1.55195	3.16691	2.23332
AC005332.4	1.56114	3.23865	1.01824	0.980219	1.08095	0.83882	1.92602	2.42316	1.70482	0.984706	1.53696	2.52148	1.72369	2.25571	1.31926	1.93536	2.65878	1.46972	0.994199	1.57148	1.40467	1.93819	1.71298	2.34534	1.78762	2.50795	0.818272	2.1126	1.22823	1.14481	2.03877	1.86345	1.4501	2.30675	3.7617	1.99717	1.33591	1.44993	2.54105	2.74391	1.64532	1.50718	4.20034	1.45646	1.66694	1.30639	1.17532	1.93524	1.28888
AC005332.3	1.94948	5.60646	3.40566	6.04734	3.83223	4.74166	5.13093	13.8375	4.41747	5.30448	6.39242	7.6256	3.22092	3.57615	5.10494	7.11853	6.13525	4.28658	4.57338	4.58794	5.62042	3.95611	9.17967	12.8472	10.4147	7.44741	2.15761	5.32967	8.75199	2.78666	4.97869	3.60472	4.67664	5.10138	7.68673	13.5738	2.77453	5.09522	7.68332	8.01158	6.06517	4.24047	25.7229	4.60274	5.61028	7.73266	3.88319	9.20505	6.50906
AC005288.1	5.68003	12.3739	10.901	10.7943	13.3587	11.8305	11.4013	5.49665	9.27408	5.71956	2.60823	11.8106	8.33981	12.2963	12.238	7.49826	6.90757	7.15385	10.08	10.9702	10.6646	12.4987	3.67626	4.89356	4.84044	10.8894	7.11725	11.4301	12.3095	10.0251	9.9758	7.00376	10.4853	12.881	7.67377	15.5354	8.03225	8.87943	12.3755	3.49534	8.28551	10.1112	14.3892	9.68249	11.3679	10.0255	9.47495	10.7119	10.361
AC005261.3	4.75967	3.34489	1.99292	2.47573	2.82434	2.00784	5.0945	4.8589	1.25113	3.99389	3.05747	2.37265	1.77377	2.47673	2.2644	6.20455	3.94113	1.85779	3.63161	3.60856	1.6502	1.66474	4.07278	5.86322	5.84877	3.66396	2.40332	2.50343	3.24624	2.05343	4.40893	2.58318	1.6581	2.46413	4.24925	3.20637	2.44287	2.92678	3.39056	9.33679	4.95424	2.86463	5.243	3.67414	1.92277	3.16776	0.983977	5.40429	2.78667
AC005253.1	0.387115	0.949321	0.220379	1.07622	0.642821	0.499305	0.635348	1.04995	0.865976	0.0340232	0.125717	1.72263	0.436986	0.338488	1.10437	0.267966	0.425122	0.323266	0.231671	0.144793	1.20851	0.389494	0.284173	0.91829	0.963869	1.83285	0.141907	0.652018	1.68007	0.425267	1.26101	0.135795	0.389573	1.0718	1.65617	0.189684	0.344431	0.931041	1.74877	0.935361	0.131888	1.21226	2.98477	0.419029	1.57202	0.839943	0.553364	2.26438	0.64573
AC005208.1	0	0.211457	0.430585	0.66525	0.352407	0.741763	0.144469	1.10419	1.07896	0.201147	0.0381152	1.83839	1.05043	0.357526	0.101462	0.500282	0.799114	1.22837	0.526789	0.740789	0.871315	0.452669	0.0827098	0.68255	0.263005	1.0275	0.301166	0.406192	1.31909	0.223937	1.85041	0.0411704	0.53629	0.881604	1.37651	1.17318	0.626552	0.874742	0.807654	1.03122	0.299896	0.878347	15.234	0.28913	2.4047	0.912791	0.929188	1.36545	1.40347
AC005104.1	0.250361	1.79802	0.369514	1.6556	1.43514	0.226043	1.61793	2.15382	0.859266	0.26955	0.189714	1.76768	0.824292	0.84034	1.6413	0.893879	0.866066	0.227651	0.262203	0.368718	2.10171	0.587766	0.257298	2.14567	2.47269	2.03526	0.356908	0.768272	3.74517	0.531976	2.89246	0	0.52433	1.85649	3.23179	0.729917	0.4607	1.15796	2.6253	1.86062	0.199026	1.34877	5.83273	0.261656	1.81963	1.18521	0.481762	3.85127	0.949128
AC005082.1	2.15394	0.619741	0.192809	0.113127	0.0953388	0.0655261	0.17197	0.145325	0.140111	0.142323	0.237166	0.361709	0.168971	4.71797	0.164695	0.124933	0.118555	0.1202	0.136815	13.7882	0.210337	0.292847	0.134256	0.242967	0.181834	0.113459	0.100875	0.219779	0.0653408	3.12278	3.79797	0.222762	0.207265	0.266026	0.126474	0.261377	3.68288	0.130912	0.267551	0.306879	0.129812	0.455026	0.274757	0.0568873	0.0527479	0.407993	0.139655	0.0246269	0.255877
AC005034.5	0.542781	1.58064	1.36688	1.25627	1.32342	2.50135	1.60281	1.268	1.42627	0.547858	0.359886	1.92321	2.54656	0.468859	2.05972	0.938682	1.09528	1.32641	1.24349	1.36006	1.8669	1.99769	0.536904	0.508791	1.48309	2.12843	1.2864	1.34235	1.11831	1.63387	1.69663	0.485917	0.678171	1.76088	1.10352	4.92772	1.04201	1.49371	1.55631	1.46052	1.51021	1.5881	6.08556	1.86135	3.56688	1.59257	2.95495	1.82646	1.69246
AC005034.3	1.98172	2.98465	3.3843	4.55976	4.35718	4.67051	4.9849	3.68296	3.20663	4.10159	3.4079	4.38025	4.10546	6.65345	4.96391	2.57656	2.95405	2.65769	3.4098	4.41561	4.28771	5.68188	3.76266	2.66909	2.41962	4.58157	3.68422	4.3479	3.74339	4.55693	4.36196	2.38491	3.50941	4.20597	3.85935	8.85343	4.34856	4.39454	3.5494	3.57118	5.56419	3.49482	9.39536	5.18017	7.87752	3.9732	4.74552	3.62531	3.49636
AC004921.1	0.172535	0.846214	0.690735	0.399332	0.336541	0.477064	0.585367	2.01531	0.550522	0.789474	2.40235	0.815111	0.326632	0.447111	0.822215	0.943268	0.580266	0.804034	0.569191	0.321154	0.78454	0.886059	0.713696	0.889516	0.504322	1.35314	0.387389	0.316974	0.529734	0.244406	1.10157	0.401594	0.718572	1.1958	1.36414	0.258906	1.06847	0.39102	1.70674	3.13374	0.450049	0.673083	0.58619	0.631116	0.0975321	1.90582	0.329237	0.887946	0.663898
AC004918.3	0.820333	1.90693	1.99522	4.385	2.00015	1.29614	2.09598	1.31309	1.38574	1.04881	1.06517	8.96835	2.74589	3.28323	5.55024	1.02206	1.24152	0.808083	0.90209	1.95764	4.71851	1.77876	1.30324	1.85832	1.26843	1.59594	0.852721	2.76298	3.52393	1.99727	2.38235	1.00367	1.66271	1.99598	3.39739	1.64133	1.60871	1.85914	1.92091	0.613156	0.832145	4.31143	26.9419	0.843947	2.80168	2.05298	2.53225	4.49245	2.66675
AC004918.1	1.04706	6.59545	2.20595	5.86506	1.57897	1.44892	4.82941	19.0995	3.29855	3.75769	3.43037	8.98303	2.87955	1.92951	5.68187	5.82746	3.00128	2.12818	2.16736	4.18604	4.13635	2.99436	10.2206	10.033	12.2318	5.45203	1.61851	4.50293	5.00298	2.15212	4.10717	2.26437	1.25864	4.31114	9.79508	3.30264	1.64775	3.00443	4.89773	7.80778	3.74156	5.65987	8.81676	1.87747	3.04069	7.88062	3.06042	9.68819	4.6419
AC004908.2	0.605901	0.439001	0.625985	0.728497	0.521857	0.348122	0.996688	1.02942	0.744373	0.474429	0.146086	2.44211	0.671004	0.91354	1.45829	0.172079	0.913901	0.550941	0.242286	0.410115	1.46426	0.546892	0.832141	1.2736	2.49208	2.29055	0.302315	0.56046	1.887	0.819281	0.791276	0.157796	0.69739	1.20213	3.93197	2.21518	0.409333	0.606334	1.51618	0.988099	0.5364	1.32511	7.48567	0.654824	0.902979	2.0915	0.766679	1.39558	0.52622
AC004908.1	0.525976	0.537438	0.724548	1.12075	1.36794	0.800272	0.851862	0.849503	0.877532	0.188763	0.348744	2.46364	0.904348	0.525018	2.04237	0.234741	1.15309	0.77054	0.299909	0.334717	1.85339	0.780338	0.336343	0.986076	2.04991	1.79073	0.349915	0.825898	1.92655	0.889952	1.21267	0.167421	0.623099	1.17205	2.58758	0.736663	0.752789	0.756846	2.34597	0.943534	0.325211	1.06395	5.5596	0.480992	1.02413	1.08936	0.551043	2.54497	0.775443
AC004832.5	0.118268	0.580057	0.285106	0.469254	1.31823	0.58136	0.35667	1.30981	1.59827	0.424442	0.575055	1.08882	0.830693	0.326915	0.333989	0.492636	0.176781	0.609395	0.231209	0.225788	0.698657	0.350925	0.850818	0.443447	0.721459	1.66813	0.35406	0.222848	0.917353	0.530523	0.755099	1.01643	0.15762	0.325549	0.712444	0.8992	0.234371	0.663703	0.90429	1.34367	0.329063	0.358852	12.8582	0.288409	2.31766	1.03423	0.708026	1.49825	0.585856
AC004812.2	4.00875	2.01797	0.896963	1.47773	0.765736	1.1133	1.15355	1.36388	0.578127	1.15418	0.720803	1.30592	0.840127	1.30425	1.3911	1.65094	1.3406	0.96105	1.51647	1.00313	1.16892	0.909812	1.56414	1.88711	3.30814	1.99379	0.745825	1.40829	1.91288	1.66295	1.69505	1.26519	0.73448	1.38044	2.04649	1.54977	1.12953	0.948352	1.27281	2.36998	1.52287	1.4922	1.70312	1.32552	1.04983	1.79291	1.2474	2.16381	1.08986
AC004687.1	0.107011	0.620275	0.371879	1.65976	0.422888	0.22544	1.26155	5.49477	0.248328	0.0942653	1.62547	2.77172	0.294673	0.416808	0.460169	1.30251	0.514764	0.539599	0.841565	0.0780044	0.970924	0.206502	2.39349	3.56253	2.09684	2.14339	0.116495	0.362948	0.924362	0.427202	1.0766	0.585253	0.0388957	2.61664	0.668075	0.0817507	0.231342	0.365359	7.23009	2.91438	0.0270676	1.72047	8.77864	1.06756	0.31896	0.61789	0.331966	1.01673	1.54898
AC004656.1	7.98248	7.95937	7.31352	9.72547	7.89374	11.7683	6.30401	5.09879	9.93886	4.94687	6.64764	19.5637	10.191	12.9522	8.58194	5.42076	4.70494	9.37786	11.1938	7.8014	8.40761	11.7167	6.34899	3.74329	3.09049	11.8383	14.2587	6.31726	5.99146	12.4203	8.11707	7.51894	7.34909	10.0083	7.64571	22.2015	9.13063	15.7918	7.08981	4.35314	8.41761	8.49936	22.5557	13.7061	24.5475	6.87321	10.9989	6.78036	13.1269
AC004585.1	0	0.291239	0.286296	0.471212	0.63245	0.514288	1.07448	2.16473	0.376467	0.312557	2.15233	0.863183	0.234608	0.200615	0.19564	1.86099	0.473383	0.383961	0.193478	0.105807	0.516948	0.795136	1.55685	2.88619	0.630558	1.61733	0.289697	0.134267	0.707945	0.448621	3.25767	0.378026	0.105519	2.47516	1.33545	1.09305	1.63437	0.854452	3.3447	2.17778	0.312079	0.909453	0.968389	0.313747	0.596753	1.0021	0.260693	0.104479	0.462237
AC004492.1	0.213053	0.496345	0.638333	0.535376	0.926137	0.942555	0.728188	0.398174	0.575836	0.367011	0.169515	3.25187	0.939953	0.883376	1.18828	0.437388	0.458582	0.833027	0.437334	0.341664	1.60967	0.671072	0.122616	1.19826	1.06139	1.21238	0.233866	0.722606	1.90044	0.845044	1.60965	0	0.482702	0.955087	1.88663	2.45535	0.696638	1.02087	1.83265	0.573284	0.47423	0.886558	12.1028	0.779326	1.85472	1.14727	0.746147	1.24829	1.01769
AC004253.1	0.356339	1.90658	0.167342	0.599816	0.469394	0.307103	0.814121	2.1526	0.632344	0.418528	0.257746	1.97777	0.319968	0.223861	1.14353	0.780705	0.929693	0.353473	0.189989	0.222641	1.08777	0.221817	1.39827	1.66	3.78758	2.26881	0.193959	0.47611	1.10977	0.367109	1.13755	0.0928022	0.215866	0.726101	2.81006	0.466668	0.353077	0.587331	1.82053	1.85957	0.405597	1.348	3.34585	0.236992	0.842364	1.83388	0.46544	3.18045	0.825275
AC004148.2	0.725984	2.36044	0.682629	2.44896	0.76373	0.790489	2.08281	3.84509	1.29832	0.395204	0.984348	3.91298	1.06352	1.2514	2.63183	1.69647	1.31683	0.712052	0.598006	0.504562	2.54125	0.61999	2.65243	3.64983	7.86209	4.32046	0.2442	0.774657	2.7892	1.01107	1.69261	0.210313	0.739246	2.12668	5.99978	0.881324	0.711256	1.04582	4.85552	4.17036	0.419875	3.08674	6.93958	1.1786	1.31879	2.35396	0.871679	4.40471	1.61052
AC004069.1	0.11518	0.60022	0.267746	0.914005	0.320953	0.485299	0.434198	1.49486	1.12417	0.279019	0.343662	2.42774	1.0239	0.238785	0.223623	0.385533	0.593971	0.837861	0.464418	0.560727	0.966907	0.453493	1.03575	3.02309	1.69801	3.0671	0.258612	0.423209	0.856177	0.469084	0.735385	0.164982	0.0767524	0.713362	2.13357	0.898769	0.37091	0.522072	0.363281	1.34302	0.360531	0.861225	1.64358	0.421319	0.781323	0.795178	0.362009	1.55033	1.00867
AC003102.1	0.369284	1.52217	0.267879	0.758585	0.385336	0.248287	1.14527	1.99052	0.37753	0.236861	0.156287	1.64468	0.258688	0.499526	1.34795	0.554041	0.352332	0.207188	0.264965	0.207002	1.12129	0.182922	1.11917	1.07039	2.54029	1.94894	0.12545	0.461912	0.853217	0.684498	2.43299	0.168815	0.408386	1.30694	3.29424	0.264105	0.443756	0.478239	2.15373	2.35381	0.142098	1.00129	2.73354	0.474219	0.728413	1.93107	0.289281	1.44327	0.792324
AC003092.1	0.0891457	0.218612	1.33546	0	0.596177	0	0.0896145	0.339379	0	0.0799818	0.197024	0.237574	0.107618	0	0.0734264	0.0265235	0	0.0945694	0.108922	0	0.0138584	0.0508679	0.0641312	0.0557088	0.181269	0.195109	0.118612	0.0167974	0.259299	0.0420934	0.0632404	0.0425634	0.0396025	0.0350551	0.134253	0.267545	0	0.634961	0	0.133263	0	0.212526	1.61533	0	0.0503931	1.51809	0.0266841	0.117637	0.820104
AC003070.1	0.138368	1.39969	0.214431	2.51626	0.616905	0.874493	0.695477	2.15496	0.883004	0.335189	0.183487	2.26279	0.569454	1.14742	2.36892	0.957168	0.620474	0.975079	0.608631	0.19812	1.9682	0.710592	0.497706	3.37227	3.48179	3.43218	0.103558	1.21235	1.83348	0.759523	1.546	0.0495486	0.737629	3.14223	2.81314	0.290689	0.959708	0.806364	5.9511	2.29598	0.192494	3.28373	5.64128	1.01227	1.40792	2.14933	0.559139	3.23186	1.43204
AC002553.2	0.382078	0.409925	0.394744	1.07382	0.266168	0.452768	1.82442	2.8761	1.5777	0.565624	0.760001	1.18023	0.597531	0.660086	1.11271	0.38367	0.813833	0.303994	0.630237	0.328245	1.9601	0.457842	0.137433	1.73107	2.23364	1.95123	0.381277	0.539953	2.06835	0.710373	0.711502	0.20523	0.445558	1.57759	2.41671	1.72005	0.567872	0.804063	1.15031	1.3708	0.332211	0.931589	13.7601	0.698803	1.56589	1.58267	0.21444	3.10079	0.861843
AC002553.1	0.335093	1.61933	0.448024	0.860298	0.615174	0.7267	2.10039	4.70714	1.1839	0.70033	0.758027	1.97707	0.882612	0.790045	1.30812	1.10843	1.41425	0.555625	0.751429	0.474154	1.6731	0.539885	0.99262	2.48823	3.98807	3.36503	0.21637	0.601691	2.11501	0.781824	1.63605	0.479979	0.709289	1.90679	3.98969	1.18316	0.312495	0.970027	3.59455	2.12158	0.685548	1.6661	10.5544	0.793124	1.55997	2.17732	0.460217	3.49591	1.21356
AC002401.4	0	0.16624	2.01705	0.107588	0.120894	0.0571246	0.327101	0.619381	0.244294	0.233552	0.539366	0.157666	0.124987	0	0.172294	0.580879	0.413418	0.221906	1.55055	0.279543	0.151753	0.389912	0.312112	0.440574	0.385961	0.158259	0.162353	0.183936	0.946462	0.0384111	0	1.24288	0.614348	6.10981	0.245017	0.16276	0.295543	0.245813	0.0932985	1.89705	0.150891	0.176304	1.17922	0.743902	0.214596	1.83457	0.0973991	0.257632	0.54688
AC002128.1	0.809096	0.629585	0.192904	0.926037	0.502943	0.180285	0.531807	2.29403	0.677539	0.117265	0.144433	1.42493	0.235651	0.344076	0.582208	0.249989	0.209318	0.367853	0.136882	0.071292	1.23362	0.245047	0.268644	0.719535	1.24973	1.45299	0.0776345	0.228683	1.83044	1.09103	1.20866	0.200584	0.808733	0.826004	2.05269	0.149432	0.277508	0.322404	1.49902	0.893179	0.0432921	0.6677	7.23178	0.199204	0.686061	1.37497	0.29342	1.52762	0.660653
AC002091.2	0.157299	0.385743	0.406282	0.468086	0.832802	0.621336	0.909223	0.326639	0.531431	0.211693	0.156443	1.54342	0.983994	0.108701	1.41592	0.666915	0.529023	0.572122	0.403609	0.0900904	0.623559	2.15417	0.0565801	0.638942	0.199907	0.172136	0.588632	0.355671	0.279605	0.752026	2.51074	0.281638	0.628911	1.48452	0.781739	0.377669	1.48066	0.305562	0.947142	1.76359	0.328245	0.818192	1.92393	0.287691	1.02257	1.30314	0.494385	0.498174	0.75137
AC002091.1	0.113526	0.4872	0.557124	0.600585	0.601053	0.508224	0.570615	1.23765	0.554011	1.00837	0.752724	0.948899	0.691483	0.274581	1.32247	0.683993	0.58544	1.26455	0.624202	0.227571	0.794183	2.04056	0.367517	0.532084	0.115422	0.662586	0.906303	0.705913	0.660428	0.623163	2.17447	0.569142	0.567375	1.8415	0.461618	0.988075	1.23736	0.624839	0.943984	2.24016	0.394836	0.553601	1.61997	0.778626	1.15515	1.84183	0.382296	0.808974	1.14482
AC002064.2	0	0.201214	0.678167	1.37457	0.18291	0.288094	0.439907	0.113589	1.23204	0.17668	0.145075	4.29381	0.396214	1.20962	0.579281	0.244127	1.07928	0.646606	0.401016	0.187974	1.27555	0.112367	0	2.11937	3.44808	1.43665	0.218344	0.494739	1.87394	0.271204	0.873111	0.078352	0.437409	0.451714	3.95419	6.6324	0.4336	0.141679	1.25474	0.981261	0.228295	0.995844	21.4095	0.100045	1.23687	0.981865	1.03154	2.16551	0.754836
AC000123.1	1.04164	2.3666	1.3927	1.82336	2.35621	1.09721	2.83339	3.81712	1.05805	0.725664	0.812534	2.00406	1.25077	1.99011	2.48739	1.14853	1.92335	0.807872	1.07808	0.84224	1.57169	0.98597	0.925676	2.56548	1.61971	1.51987	1.31461	1.35082	2.27733	1.64915	4.72709	0.833781	1.51073	3.46964	3.59881	2.97908	1.57852	3.13438	2.03798	2.80287	1.0229	1.35454	11.3248	1.28876	2.56315	4.94929	1.18299	2.81381	1.98375
[truncated: 206 more columns]
