# Supplementary material for: A Risk Signature with Autophagy-Related Long Noncoding RNAs for Predicting the Prognosis of Clear Cell Renal Cell Carcinoma: Based on the TCGA Database and Bioinformatics
Source: Dis Markers. 2021 May 7;2021:8849977. doi: 10.1155/2021/8849977 (PMC8121606; doi:10.1155/2021/8849977)
Supplement: Supplementary Materials — Table S1: 232 autophagy genes obtained from the Human Autophagy Database. Table S2: 210 autophagy genes expression matrix. Table S3: 813 autophagy-related lncRNAs. Table S4: 17 autophagy genes and 19 lncRNAs used to enrichment analyses. Table S5: results of enrichment via DAVID web serve. [file 8849977.f1.zip › 8849977.f4.xlsx]

## Sheet: Sheet1
ATG16L2
ATG4B
BCL2
BIRC5
CAPN10
CDKN2A
ERBB2
HGS
IKBKB
MAPK1
MAPK8
NBR1
PIK3C3
PINK1
RAB24
ULK3
WDFY3
AC005785.1
AC010973.2
AC016773.1
AC026401.3
AC048341.2
AC078778.1
AC103706.1
AC145423.2
AC145423.3
AL591845.1
AP003352.1
DLGAP1-AS2
EMX2OS
EPB41L4A-DT
HOTAIRM1
LINC01507
MELTF-AS1
SNHG17
SNHG3
