# Supplementary material for: A Risk Signature with Autophagy-Related Long Noncoding RNAs for Predicting the Prognosis of Clear Cell Renal Cell Carcinoma: Based on the TCGA Database and Bioinformatics
Source: Dis Markers. 2021 May 7;2021:8849977. doi: 10.1155/2021/8849977 (PMC8121606; doi:10.1155/2021/8849977)
Supplement: Supplementary Materials — Table S1: 232 autophagy genes obtained from the Human Autophagy Database. Table S2: 210 autophagy genes expression matrix. Table S3: 813 autophagy-related lncRNAs. Table S4: 17 autophagy genes and 19 lncRNAs used to enrichment analyses. Table S5: results of enrichment via DAVID web serve. [file 8849977.f1.zip › 8849977.f5.xlsx]

## Sheet: BP
Category	Term	Count	%	PValue	Genes	List Total	Pop Hits	Pop Total	Fold Enrichment	Bonferroni	Benjamini	FDR
GOTERM_BP_DIRECT	GO:0006468~protein phosphorylation	7	30.4348	2.46598e-06	IKBKB, PINK1, MAPK8, ERBB2, MAPK1, BIRC5, PIK3C3	17	456	16792	15.1631	0.000978515	0.000978992	0.000961731
GOTERM_BP_DIRECT	GO:0006914~autophagy	5	21.7391	6.35856e-06	HGS, RAB24, ULK3, ATG4B, PIK3C3	17	133	16792	37.134	0.00252117	0.00126217	0.00123992
GOTERM_BP_DIRECT	GO:0016236~macroautophagy	4	17.3913	4.78236e-05	PINK1, NBR1, ATG4B, PIK3C3	17	76	16792	51.9876	0.0188073	0.00632866	0.00621707
GOTERM_BP_DIRECT	GO:0018105~peptidyl-serine phosphorylation	4	17.3913	0.000210088	PINK1, MAPK8, BCL2, MAPK1	17	125	16792	31.6085	0.0800294	0.0208512	0.0204835
GOTERM_BP_DIRECT	GO:0000422~mitophagy	3	13.0435	0.00049726	PINK1, CDKN2A, ATG4B	17	35	16792	84.6655	0.179188	0.0388094	0.0381251
GOTERM_BP_DIRECT	GO:0018107~peptidyl-threonine phosphorylation	3	13.0435	0.00058654	MAPK8, BCL2, MAPK1	17	38	16792	77.9814	0.207787	0.0388094	0.0381251
GOTERM_BP_DIRECT	GO:0045727~positive regulation of translation	3	13.0435	0.00114018	PINK1, ERBB2, MAPK1	17	53	16792	55.9112	0.364224	0.0646645	0.0635243
GOTERM_BP_DIRECT	GO:0006950~response to stress	3	13.0435	0.00150746	PINK1, MAPK8, MAPK1	17	61	16792	48.5786	0.450592	0.0748078	0.0734887
GOTERM_BP_DIRECT	GO:0031647~regulation of protein stability	3	13.0435	0.00197944	CDKN2A, BCL2, MAPK1	17	70	16792	42.3328	0.544617	0.0873153	0.0857757
GOTERM_BP_DIRECT	GO:0033088~negative regulation of immature T cell proliferation in thymus	2	8.69565	0.00475567	CDKN2A, ERBB2	17	5	16792	395.106	0.849306	0.1888	0.185471
GOTERM_BP_DIRECT	GO:0043524~negative regulation of neuron apoptotic process	3	13.0435	0.00684709	PINK1, BCL2, BIRC5	17	132	16792	22.4492	0.934627	0.232058	0.227967
GOTERM_BP_DIRECT	GO:1903214~regulation of protein targeting to mitochondrion	2	8.69565	0.00759888	PINK1, CDKN2A	17	8	16792	246.941	0.951601	0.232058	0.227967
GOTERM_BP_DIRECT	GO:0032872~regulation of stress-activated MAPK cascade	2	8.69565	0.00759888	NBR1, MAPK1	17	8	16792	246.941	0.951601	0.232058	0.227967
GOTERM_BP_DIRECT	GO:0043066~negative regulation of apoptotic process	4	17.3913	0.00850943	IKBKB, MAPK8, BCL2, BIRC5	17	455	16792	8.68365	0.966382	0.241303	0.237048
GOTERM_BP_DIRECT	GO:0038095~Fc-epsilon receptor signaling pathway	3	13.0435	0.0121616	IKBKB, MAPK8, MAPK1	17	178	16792	16.6477	0.992232	0.321877	0.316201
GOTERM_BP_DIRECT	GO:0006915~apoptotic process	4	17.3913	0.0154467	CDKN2A, BCL2, MAPK1, BIRC5	17	567	16792	6.96836	0.99793	0.383272	0.376514
GOTERM_BP_DIRECT	GO:2000378~negative regulation of reactive oxygen species metabolic process	2	8.69565	0.0198317	PINK1, BCL2	17	21	16792	94.0728	0.999648	0.463129	0.454963
GOTERM_BP_DIRECT	GO:0090398~cellular senescence	2	8.69565	0.0217011	CDKN2A, ULK3	17	23	16792	85.8926	0.999835	0.47863	0.47019
GOTERM_BP_DIRECT	GO:0051090~regulation of sequence-specific DNA binding transcription factor activity	2	8.69565	0.0235671	MAPK8, MAPK1	17	25	16792	79.0212	0.999923	0.487061	0.478473
GOTERM_BP_DIRECT	GO:0010628~positive regulation of gene expression	3	13.0435	0.0251984	MAPK8, HGS, ERBB2	17	262	16792	11.3103	0.99996	0.487061	0.478473
GOTERM_BP_DIRECT	GO:0051881~regulation of mitochondrial membrane potential	2	8.69565	0.0263599	PINK1, BCL2	17	28	16792	70.5546	0.999975	0.487061	0.478473
GOTERM_BP_DIRECT	GO:0042149~cellular response to glucose starvation	2	8.69565	0.0272892	BCL2, PIK3C3	17	29	16792	68.1217	0.999983	0.487061	0.478473
GOTERM_BP_DIRECT	GO:1900740~positive regulation of protein insertion into mitochondrial membrane involved in apoptotic signaling pathway	2	8.69565	0.0282176	MAPK8, BCL2	17	30	16792	65.851	0.999988	0.487061	0.478473
GOTERM_BP_DIRECT	GO:0000045~autophagosome assembly	2	8.69565	0.0383757	ATG16L2, ATG4B	17	41	16792	48.1836	1	0.634799	0.623606
GOTERM_BP_DIRECT	GO:0048538~thymus development	2	8.69565	0.0402119	BCL2, MAPK1	17	43	16792	45.9425	1	0.638566	0.627306
GOTERM_BP_DIRECT	GO:0000910~cytokinesis	2	8.69565	0.0447881	BIRC5, PIK3C3	17	48	16792	41.1569	1	0.68388	0.671821
GOTERM_BP_DIRECT	GO:0032880~regulation of protein localization	2	8.69565	0.0484342	MAPK8, BCL2	17	52	16792	37.991	1	0.712163	0.699606
GOTERM_BP_DIRECT	GO:0050853~B cell receptor signaling pathway	2	8.69565	0.0502524	BCL2, MAPK1	17	54	16792	36.5839	1	0.712508	0.699945
GOTERM_BP_DIRECT	GO:0015031~protein transport	3	13.0435	0.0532966	ATG16L2, RAB24, ATG4B	17	395	16792	7.50201	1	0.729612	0.716748
GOTERM_BP_DIRECT	GO:0033138~positive regulation of peptidyl-serine phosphorylation	2	8.69565	0.0646811	PINK1, BCL2	17	70	16792	28.2218	1	0.851247	0.836238
GOTERM_BP_DIRECT	GO:0016485~protein processing	2	8.69565	0.0664702	ATG4B, PIK3C3	17	72	16792	27.4379	1	0.851247	0.836238
GOTERM_BP_DIRECT	GO:0008284~positive regulation of cell proliferation	3	13.0435	0.0713694	BCL2, MAPK1, BIRC5	17	466	16792	6.359	1	0.863994	0.84876
GOTERM_BP_DIRECT	GO:0014066~regulation of phosphatidylinositol 3-kinase signaling	2	8.69565	0.0718182	ERBB2, MAPK1	17	78	16792	25.3273	1	0.863994	0.84876
GOTERM_BP_DIRECT	GO:0030307~positive regulation of cell growth	2	8.69565	0.0771374	ERBB2, BCL2	17	84	16792	23.5182	1	0.884983	0.869379
GOTERM_BP_DIRECT	GO:0009636~response to toxic substance	2	8.69565	0.0780212	BCL2, MAPK1	17	85	16792	23.2415	1	0.884983	0.869379
GOTERM_BP_DIRECT	GO:0045893~positive regulation of transcription, DNA-templated	3	13.0435	0.0848752	IKBKB, CDKN2A, MAPK1	17	515	16792	5.75397	1	0.916132	0.899979
GOTERM_BP_DIRECT	GO:0046854~phosphatidylinositol phosphorylation	2	8.69565	0.0859393	ERBB2, PIK3C3	17	94	16792	21.0163	1	0.916132	0.899979
GOTERM_BP_DIRECT	GO:0071456~cellular response to hypoxia	2	8.69565	0.0876903	PINK1, BCL2	17	96	16792	20.5784	1	0.916132	0.899979
GOTERM_BP_DIRECT	GO:0048015~phosphatidylinositol-mediated signaling	2	8.69565	0.0963978	ERBB2, PIK3C3	17	106	16792	18.6371	1	0.98128	0.963978

## Sheet: CC
Category	Term	Count	%	PValue	Genes	List Total	Pop Hits	Pop Total	Fold Enrichment	Bonferroni	Benjamini	FDR
GOTERM_CC_DIRECT	GO:0005829~cytosol	13	56.5217	1.13083e-06	CDKN2A, IKBKB, PINK1, MAPK8, HGS, CAPN10, NBR1, RAB24, BCL2, BIRC5, ATG4B, MAPK1, PIK3C3	17	3315	18224	4.20392	9.8377e-05	9.83818e-05	9.38585e-05
GOTERM_CC_DIRECT	GO:0005739~mitochondrion	8	34.7826	6.93593e-05	PINK1, MAPK8, CDKN2A, CAPN10, NBR1, RAB24, BCL2, MAPK1	17	1331	18224	6.44328	0.0060163	0.00301713	0.00287841
GOTERM_CC_DIRECT	GO:0005622~intracellular	7	30.4348	0.000637064	IKBKB, MAPK8, HGS, CAPN10, RAB24, MAPK1, PIK3C3	17	1332	18224	5.63363	0.0539333	0.0184749	0.0176254
GOTERM_CC_DIRECT	GO:0005776~autophagosome	3	13.0435	0.00141141	NBR1, RAB24, WDFY3	17	64	18224	50.25	0.11563	0.0306981	0.0292867
GOTERM_CC_DIRECT	GO:0005737~cytoplasm	11	47.8261	0.00495113	IKBKB, PINK1, CDKN2A, HGS, ERBB2, BCL2, ULK3, ATG4B, MAPK1, BIRC5, WDFY3	17	5222	18224	2.25814	0.350673	0.0727391	0.0693948
GOTERM_CC_DIRECT	GO:0005770~late endosome	3	13.0435	0.00501649	NBR1, MAPK1, PIK3C3	17	122	18224	26.3607	0.354373	0.0727391	0.0693948
GOTERM_CC_DIRECT	GO:0000407~pre-autophagosomal structure	2	8.69565	0.0165583	NBR1, ULK3	17	19	18224	112.842	0.766045	0.205795	0.196334
GOTERM_CC_DIRECT	GO:0016020~membrane	6	26.087	0.0355575	PINK1, ERBB2, NBR1, RAB24, BCL2, PIK3C3	17	2200	18224	2.92364	0.957141	0.386688	0.368909

## Sheet: MF
Category	Term	Count	%	PValue	Genes	List Total	Pop Hits	Pop Total	Fold Enrichment	Bonferroni	Benjamini	FDR
GOTERM_MF_DIRECT	GO:0016301~kinase activity	7	30.4348	3.57574e-08	PINK1, MAPK8, CDKN2A, HGS, ERBB2, MAPK1, PIK3C3	16	241	16881	30.645	2.75332e-06	2.75332e-06	2.68181e-06
GOTERM_MF_DIRECT	GO:0004672~protein kinase activity	5	21.7391	0.00022803	IKBKB, PINK1, ERBB2, ULK3, PIK3C3	16	359	16881	14.6945	0.017407	0.00698515	0.00680372
GOTERM_MF_DIRECT	GO:0004674~protein serine/threonine kinase activity	5	21.7391	0.000272149	IKBKB, PINK1, MAPK8, ULK3, MAPK1	16	376	16881	14.0301	0.0207402	0.00698515	0.00680372
GOTERM_MF_DIRECT	GO:0005515~protein binding	15	65.2174	0.000820845	CDKN2A, IKBKB, PINK1, MAPK8, HGS, NBR1, ERBB2, RAB24, ULK3, BCL2, BIRC5, ATG4B, MAPK1, PIK3C3, WDFY3	16	8785	16881	1.80147	0.0612734	0.0158013	0.0153908
GOTERM_MF_DIRECT	GO:0005524~ATP binding	7	30.4348	0.0011849	IKBKB, PINK1, MAPK8, ERBB2, ULK3, MAPK1, PIK3C3	16	1495	16881	4.94009	0.0872487	0.0182475	0.0177736
GOTERM_MF_DIRECT	GO:0046982~protein heterodimerization activity	4	17.3913	0.00738186	IKBKB, ERBB2, BCL2, BIRC5	16	465	16881	9.07581	0.434764	0.0947339	0.0922733
GOTERM_MF_DIRECT	GO:0004707~MAP kinase activity	2	8.69565	0.0123732	MAPK8, MAPK1	16	14	16881	150.723	0.6166	0.136105	0.13257
GOTERM_MF_DIRECT	GO:0008134~transcription factor binding	3	13.0435	0.0256337	CDKN2A, BCL2, MAPK1	16	284	16881	11.145	0.864602	0.227203	0.221302
GOTERM_MF_DIRECT	GO:0042802~identical protein binding	4	17.3913	0.0265562	ERBB2, BCL2, MAPK1, BIRC5	16	749	16881	5.63451	0.874126	0.227203	0.221302
GOTERM_MF_DIRECT	GO:0002020~protease binding	2	8.69565	0.0861171	PINK1, BCL2	16	101	16881	20.8923	0.999026	0.663102	0.645879

## Sheet: KEGG
Category	Term	Count	%	PValue	Genes	List Total	Pop Hits	Pop Total	Fold Enrichment	Bonferroni	Benjamini	FDR
KEGG_PATHWAY	hsa05212:Pancreatic cancer	5	21.7391	3.39605e-06	IKBKB, MAPK8, CDKN2A, ERBB2, MAPK1	13	65	6879	40.7041	0.000376891	0.000376962	0.00029206
KEGG_PATHWAY	hsa04140:Regulation of autophagy	4	17.3913	9.13117e-06	ATG16L2, ULK3, ATG4B, PIK3C3	13	25	6879	84.6646	0.00101305	0.00050678	0.00039264
KEGG_PATHWAY	hsa05200:Pathways in cancer	7	30.4348	2.30452e-05	IKBKB, MAPK8, CDKN2A, ERBB2, BCL2, MAPK1, BIRC5	13	393	6879	9.42513	0.00255478	0.000852674	0.00066063
KEGG_PATHWAY	hsa05161:Hepatitis B	5	21.7391	8.22011e-05	IKBKB, MAPK8, BCL2, MAPK1, BIRC5	13	145	6879	18.2467	0.0090832	0.00228108	0.00176732
KEGG_PATHWAY	hsa05210:Colorectal cancer	4	17.3913	0.000144779	MAPK8, BCL2, MAPK1, BIRC5	13	62	6879	34.139	0.0159432	0.0032141	0.0024902
KEGG_PATHWAY	hsa05215:Prostate cancer	4	17.3913	0.000409453	IKBKB, ERBB2, BCL2, MAPK1	13	88	6879	24.0524	0.0444408	0.00757488	0.00586882
KEGG_PATHWAY	hsa05145:Toxoplasmosis	4	17.3913	0.000787985	IKBKB, MAPK8, BCL2, MAPK1	13	110	6879	19.242	0.0837819	0.0124952	0.00968096
KEGG_PATHWAY	hsa04722:Neurotrophin signaling pathway	4	17.3913	0.0010153	IKBKB, MAPK8, BCL2, MAPK1	13	120	6879	17.6385	0.106631	0.0140873	0.0109145
KEGG_PATHWAY	hsa05219:Bladder cancer	3	13.0435	0.00220281	CDKN2A, ERBB2, MAPK1	13	41	6879	38.7186	0.217124	0.027168	0.0210491
KEGG_PATHWAY	hsa04930:Type II diabetes mellitus	3	13.0435	0.00300972	IKBKB, MAPK8, MAPK1	13	48	6879	33.0721	0.284363	0.0313296	0.0242734
KEGG_PATHWAY	hsa05152:Tuberculosis	4	17.3913	0.00310473	MAPK8, BCL2, MAPK1, PIK3C3	13	177	6879	11.9583	0.291894	0.0313296	0.0242734
KEGG_PATHWAY	hsa05223:Non-small cell lung cancer	3	13.0435	0.00407727	CDKN2A, ERBB2, MAPK1	13	56	6879	28.3475	0.364601	0.0346318	0.0268318
KEGG_PATHWAY	hsa04621:NOD-like receptor signaling pathway	3	13.0435	0.00407727	IKBKB, MAPK8, MAPK1	13	56	6879	28.3475	0.364601	0.0346318	0.0268318
KEGG_PATHWAY	hsa04150:mTOR signaling pathway	3	13.0435	0.00436797	IKBKB, ULK3, MAPK1	13	58	6879	27.37	0.384861	0.0346318	0.0268318
KEGG_PATHWAY	hsa04510:Focal adhesion	4	17.3913	0.00476726	MAPK8, ERBB2, BCL2, MAPK1	13	206	6879	10.2748	0.411649	0.0352777	0.0273323
KEGG_PATHWAY	hsa05131:Shigellosis	3	13.0435	0.0052963	IKBKB, MAPK8, MAPK1	13	64	6879	24.8041	0.445369	0.0367431	0.0284676
KEGG_PATHWAY	hsa05220:Chronic myeloid leukemia	3	13.0435	0.0066631	IKBKB, CDKN2A, MAPK1	13	72	6879	22.0481	0.523877	0.0435061	0.0337074
KEGG_PATHWAY	hsa04012:ErbB signaling pathway	3	13.0435	0.00961152	MAPK8, ERBB2, MAPK1	13	87	6879	18.2467	0.65769	0.059271	0.0459217
KEGG_PATHWAY	hsa04066:HIF-1 signaling pathway	3	13.0435	0.011614	ERBB2, BCL2, MAPK1	13	96	6879	16.5361	0.726568	0.0656632	0.0508742
KEGG_PATHWAY	hsa05206:MicroRNAs in cancer	4	17.3913	0.0118312	IKBKB, CDKN2A, ERBB2, BCL2	13	286	6879	7.40075	0.733157	0.0656632	0.0508742
KEGG_PATHWAY	hsa05142:Chagas disease (American trypanosomiasis)	3	13.0435	0.0135361	IKBKB, MAPK8, MAPK1	13	104	6879	15.2641	0.779701	0.0689679	0.0534346
KEGG_PATHWAY	hsa04620:Toll-like receptor signaling pathway	3	13.0435	0.0140371	IKBKB, MAPK8, MAPK1	13	106	6879	14.9761	0.79178	0.0689679	0.0534346
KEGG_PATHWAY	hsa04668:TNF signaling pathway	3	13.0435	0.0142906	IKBKB, MAPK8, MAPK1	13	107	6879	14.8361	0.797639	0.0689679	0.0534346
KEGG_PATHWAY	hsa04071:Sphingolipid signaling pathway	3	13.0435	0.0177674	MAPK8, BCL2, MAPK1	13	120	6879	13.2288	0.863293	0.0813923	0.0630607
KEGG_PATHWAY	hsa05169:Epstein-Barr virus infection	3	13.0435	0.0183316	IKBKB, MAPK8, BCL2	13	122	6879	13.012	0.871739	0.0813923	0.0630607
KEGG_PATHWAY	hsa04380:Osteoclast differentiation	3	13.0435	0.0209646	IKBKB, MAPK8, MAPK1	13	131	6879	12.118	0.904803	0.0867225	0.0671904
KEGG_PATHWAY	hsa05160:Hepatitis C	3	13.0435	0.0215703	IKBKB, MAPK8, MAPK1	13	133	6879	11.9358	0.911123	0.0867225	0.0671904
KEGG_PATHWAY	hsa04068:FoxO signaling pathway	3	13.0435	0.021876	IKBKB, MAPK8, MAPK1	13	134	6879	11.8467	0.914153	0.0867225	0.0671904
KEGG_PATHWAY	hsa04910:Insulin signaling pathway	3	13.0435	0.0231169	IKBKB, MAPK8, MAPK1	13	138	6879	11.5033	0.925436	0.0884818	0.0685535
KEGG_PATHWAY	hsa05164:Influenza A	3	13.0435	0.0355468	IKBKB, MAPK8, MAPK1	13	174	6879	9.12334	0.982003	0.131523	0.101901
KEGG_PATHWAY	hsa04014:Ras signaling pathway	3	13.0435	0.0571049	IKBKB, MAPK8, MAPK1	13	226	6879	7.02417	0.998536	0.204473	0.15842
KEGG_PATHWAY	hsa04010:MAPK signaling pathway	3	13.0435	0.0697565	IKBKB, MAPK8, MAPK1	13	253	6879	6.27455	0.999673	0.241968	0.187471
KEGG_PATHWAY	hsa05213:Endometrial cancer	2	8.69565	0.0870997	ERBB2, MAPK1	13	52	6879	20.3521	0.99996	0.286752	0.222168
KEGG_PATHWAY	hsa05221:Acute myeloid leukemia	2	8.69565	0.0935027	IKBKB, MAPK1	13	56	6879	18.8984	0.999981	0.286752	0.222168
